# Supplementary material
Source: publisher figshare collection journal article supplement (https://tandf.figshare.com/articles/dataset/_/22769239)
Supplement: Supplementary file 1 [file 1]

## Sheet: Thr500...Tyr41
Time	Thr500…Tyr41 N501 angle	Thr500…Tyr41 N501 dist	dist<=0.35 nm	angle<=30 deg.		Thr500…Tyr41 N501Y angle	Thr500…Tyr41 N501Y dist	dist<=0.35 nm	angle<=30 deg.
0	13.905	0.275	0.275	13.905		14.86	0.273	0.273	14.86
10	12.944	0.282	0.282	12.944		54.811	0.288	No	No
20	9.796	0.292	0.292	9.796		55.483	0.309	No	No
30	7.668	0.273	0.273	7.668		58.794	0.321	No	No
40	52.511	0.296	No	No		63.977	0.297	No	No
50	52.195	0.33	No	No		45.197	0.298	No	No
60	65.928	0.301	No	No		54.319	0.327	No	No
70	24.046	0.303	0.303	24.046		61.389	0.33	No	No
80	10.971	0.283	0.283	10.971		54.877	0.3	No	No
90	3.848	0.278	0.278	3.848		60.868	0.333	No	No
100	12.547	0.26	0.26	12.547		60.241	0.312	No	No
110	9.607	0.264	0.264	9.607		62.414	0.323	No	No
120	51.762	0.315	No	No		35.263	0.345	No	No
130	51.081	0.272	No	No		57.908	0.303	No	No
140	68.439	0.302	No	No		43.906	0.294	No	No
150	37.824	0.298	No	No		59.307	0.318	No	No
160	7.565	0.274	0.274	7.565		57.829	0.329	No	No
170	27.822	0.305	0.305	27.822		54.936	0.328	No	No
180	61.561	0.303	No	No		63.367	0.287	No	No
190	50.926	0.322	No	No		63.31	0.294	No	No
200	67.215	0.323	No	No		63.589	0.322	No	No
210	49.882	0.299	No	No		68.035	0.346	No	No
220	5.45	0.304	0.304	5.45		71.531	0.312	No	No
230	41.608	0.333	No	No		66.877	0.295	No	No
240	7.923	0.292	0.292	7.923		59.868	0.322	No	No
250	9.662	0.313	0.313	9.662		39.752	0.285	No	No
260	77.687	0.333	No	No		32.126	0.293	No	No
270	59.239	0.363	No	No		64.784	0.318	No	No
280	41.256	0.34	No	No		63.555	0.316	No	No
290	4.133	0.297	0.297	4.133		64.065	0.303	No	No
300	21.578	0.32	0.32	21.578		67.411	0.328	No	No
310	53.023	0.28	No	No		61.25	0.314	No	No
320	1.561	0.3	0.3	1.561		60.567	0.313	No	No
330	26.74	0.31	0.31	26.74		61.158	0.324	No	No
340	32.289	0.446	No	No		72.783	0.328	No	No
350	41.783	0.283	No	No		46.14	0.315	No	No
360	6.956	0.273	0.273	6.956		50.585	0.341	No	No
370	48.101	0.33	No	No		15.755	0.28	0.28	15.755
380	65.385	0.356	No	No		50.739	0.299	No	No
390	46.937	0.405	No	No		52.634	0.345	No	No
400	40.55	0.361	No	No		68.104	0.29	No	No
410	13.11	0.286	0.286	13.11		53.986	0.345	No	No
420	8.047	0.298	0.298	8.047		50.26	0.314	No	No
430	6.173	0.259	0.259	6.173		57.519	0.3	No	No
440	34.624	0.288	No	No		63.328	0.336	No	No
450	13.693	0.274	0.274	13.693		9.018	0.278	0.278	9.018
460	22.151	0.287	0.287	22.151		28.006	0.29	0.29	28.006
470	13.535	0.292	0.292	13.535		9.104	0.29	0.29	9.104
480	31.22	0.329	No	No		10.162	0.287	0.287	10.162
490	7.983	0.288	0.288	7.983		16.769	0.287	0.287	16.769
500	68.03	0.284	No	No		21.026	0.271	0.271	21.026
510	54.181	0.31	No	No		0.468	0.279	0.279	0.468
520	12.742	0.267	0.267	12.742		44.88	0.375	No	No
530	34.056	0.277	No	No		5.322	0.302	0.302	5.322
540	15.706	0.296	0.296	15.706		10.91	0.283	0.283	10.91
550	20.929	0.283	0.283	20.929		16.759	0.287	0.287	16.759
560	5.172	0.273	0.273	5.172		2.499	0.287	0.287	2.499
570	10.251	0.28	0.28	10.251		22.842	0.295	0.295	22.842
580	23.996	0.294	0.294	23.996		31.456	0.273	No	No
590	3.141	0.293	0.293	3.141		1.49	0.271	0.271	1.49
600	38.762	0.345	No	No		19.497	0.282	0.282	19.497
610	10.407	0.278	0.278	10.407		15.29	0.266	0.266	15.29
620	7.176	0.289	0.289	7.176		66.74	0.292	No	No
630	23.626	0.311	0.311	23.626		18.521	0.274	0.274	18.521
640	12.86	0.284	0.284	12.86		4.53	0.319	0.319	4.53
650	4.239	0.295	0.295	4.239		27.474	0.277	0.277	27.474
660	9.763	0.261	0.261	9.763		9.354	0.286	0.286	9.354
670	12.894	0.301	0.301	12.894		8.683	0.306	0.306	8.683
680	10.183	0.271	0.271	10.183		26.399	0.275	0.275	26.399
690	16.922	0.279	0.279	16.922		9.633	0.298	0.298	9.633
700	5.114	0.295	0.295	5.114		11.5	0.27	0.27	11.5
710	11.772	0.277	0.277	11.772		18.072	0.284	0.284	18.072
720	28.585	0.283	0.283	28.585		40.424	0.299	No	No
730	16.601	0.301	0.301	16.601		36.042	0.417	No	No
740	3.358	0.285	0.285	3.358		4.428	0.322	0.322	4.428
750	15.968	0.282	0.282	15.968		16.373	0.281	0.281	16.373
760	19.536	0.295	0.295	19.536		5.96	0.278	0.278	5.96
770	44.769	0.306	No	No		10.955	0.281	0.281	10.955
780	38.098	0.287	No	No		14.763	0.317	0.317	14.763
790	19.83	0.271	0.271	19.83		11.776	0.277	0.277	11.776
800	15.539	0.287	0.287	15.539		27.028	0.275	0.275	27.028
810	9.336	0.275	0.275	9.336		12.889	0.291	0.291	12.889
820	6.944	0.312	0.312	6.944		1.913	0.296	0.296	1.913
830	32.051	0.312	No	No		12.383	0.286	0.286	12.383
840	17.525	0.295	0.295	17.525		23.647	0.293	0.293	23.647
850	13.757	0.268	0.268	13.757		28.309	0.293	0.293	28.309
860	12.153	0.274	0.274	12.153		44.072	0.371	No	No
870	9.287	0.28	0.28	9.287		38.398	0.33	No	No
880	6.984	0.291	0.291	6.984		6.367	0.294	0.294	6.367
890	25.404	0.295	0.295	25.404		28.956	0.313	0.313	28.956
900	19.077	0.29	0.29	19.077		36.214	0.322	No	No
910	21.78	0.297	0.297	21.78		41.48	0.295	No	No
920	13.205	0.312	0.312	13.205		15.067	0.321	0.321	15.067
930	21.539	0.289	0.289	21.539		29.928	0.277	0.277	29.928
940	21.319	0.274	0.274	21.319		13.687	0.284	0.284	13.687
950	13.848	0.262	0.262	13.848		54.518	0.339	No	No
960	6.96	0.292	0.292	6.96		42.621	0.334	No	No
970	13.812	0.272	0.272	13.812		15.031	0.29	0.29	15.031
980	50.575	0.303	No	No		20.015	0.283	0.283	20.015
990	60.997	0.314	No	No		11.478	0.298	0.298	11.478
1000	16.664	0.304	0.304	16.664		40.842	0.297	No	No
1010	19.16	0.307	0.307	19.16		15.952	0.336	0.336	15.952
1020	11.617	0.29	0.29	11.617		9.408	0.282	0.282	9.408
1030	40.259	0.319	No	No		16.176	0.338	0.338	16.176
1040	53.32	0.323	No	No		61.62	0.352	No	No
1050	65.491	0.329	No	No		29.815	0.296	0.296	29.815
1060	41.214	0.286	No	No		15.67	0.284	0.284	15.67
1070	63.944	0.318	No	No		16.619	0.331	0.331	16.619
1080	47.613	0.318	No	No		54.382	0.323	No	No
1090	52.098	0.283	No	No		41.849	0.29	No	No
1100	62.53	0.323	No	No		40.959	0.31	No	No
1110	60.591	0.307	No	No		8.948	0.294	0.294	8.948
1120	72.014	0.322	No	No		8.547	0.274	0.274	8.547
1130	30.398	0.314	No	No		11.229	0.3	0.3	11.229
1140	65.494	0.296	No	No		17.935	0.283	0.283	17.935
1150	59.773	0.333	No	No		52.067	0.349	No	No
1160	46.006	0.331	No	No		60.624	0.38	No	No
1170	59.142	0.3	No	No		23.992	0.288	0.288	23.992
1180	64.891	0.305	No	No		37.271	0.295	No	No
1190	53.614	0.303	No	No		9.832	0.285	0.285	9.832
1200	65.825	0.287	No	No		11.185	0.297	0.297	11.185
1210	49.379	0.347	No	No		65.331	0.448	No	No
1220	29.751	0.325	0.325	29.751		1.706	0.272	0.272	1.706
1230	50.711	0.348	No	No		14.57	0.32	0.32	14.57
1240	63.839	0.323	No	No		15.606	0.291	0.291	15.606
1250	47.009	0.385	No	No		25.995	0.297	0.297	25.995
1260	42.972	0.345	No	No		9.239	0.281	0.281	9.239
1270	63.607	0.337	No	No		9.519	0.274	0.274	9.519
1280	52.282	0.306	No	No		7.746	0.298	0.298	7.746
1290	64.977	0.401	No	No		21.197	0.318	0.318	21.197
1300	61.705	0.287	No	No		15.948	0.286	0.286	15.948
1310	62.784	0.334	No	No		29.715	0.304	0.304	29.715
1320	72.527	0.352	No	No		15.021	0.293	0.293	15.021
1330	87.993	0.33	No	No		19.29	0.291	0.291	19.29
1340	72.701	0.316	No	No		7.597	0.279	0.279	7.597
1350	71.111	0.315	No	No		23.034	0.311	0.311	23.034
1360	76.476	0.343	No	No		14.731	0.339	0.339	14.731
1370	86.418	0.33	No	No		16.385	0.295	0.295	16.385
1380	39.019	0.363	No	No		7.166	0.307	0.307	7.166
1390	68.192	0.374	No	No		13.507	0.293	0.293	13.507
1400	50.516	0.292	No	No		30.252	0.303	No	No
1410	58.998	0.318	No	No		14.11	0.281	0.281	14.11
1420	65.909	0.368	No	No		28.135	0.297	0.297	28.135
1430	46.176	0.284	No	No		10.361	0.287	0.287	10.361
1440	84.891	0.328	No	No		14.05	0.282	0.282	14.05
1450	52.693	0.371	No	No		6.497	0.276	0.276	6.497
1460	68.021	0.338	No	No		24.522	0.317	0.317	24.522
1470	45.695	0.359	No	No		56.252	0.38	No	No
1480	60.258	0.373	No	No		6.209	0.282	0.282	6.209
1490	68.979	0.336	No	No		9.363	0.315	0.315	9.363
1500	36.797	0.338	No	No		8.811	0.297	0.297	8.811
1510	61.489	0.276	No	No		5.221	0.271	0.271	5.221
1520	57.19	0.324	No	No		7.113	0.284	0.284	7.113
1530	53.53	0.302	No	No		7.987	0.299	0.299	7.987
1540	67.309	0.326	No	No		18.552	0.314	0.314	18.552
1550	56.589	0.348	No	No		10.557	0.326	0.326	10.557
1560	57.048	0.292	No	No		42.609	0.291	No	No
1570	60.141	0.298	No	No		46.705	0.352	No	No
1580	61.69	0.345	No	No		20.989	0.323	0.323	20.989
1590	41.29	0.367	No	No		24.005	0.3	0.3	24.005
1600	64.104	0.368	No	No		11.927	0.29	0.29	11.927
1610	70.246	0.324	No	No		66.628	0.337	No	No
1620	43.776	0.327	No	No		9.057	0.287	0.287	9.057
1630	78.016	0.34	No	No		35.59	0.368	No	No
1640	69.066	0.332	No	No		38.092	0.337	No	No
1650	49.999	0.359	No	No		43.194	0.321	No	No
1660	79.166	0.295	No	No		41.976	0.352	No	No
1670	85.155	0.366	No	No		58.905	0.318	No	No
1680	61.264	0.303	No	No		6.575	0.296	0.296	6.575
1690	50.017	0.287	No	No		51.356	0.355	No	No
1700	61.824	0.31	No	No		56.54	0.325	No	No
1710	68.885	0.32	No	No		54.388	0.318	No	No
1720	49.869	0.339	No	No		64.711	0.296	No	No
1730	71.462	0.311	No	No		35.219	0.318	No	No
1740	61.08	0.337	No	No		25.495	0.327	0.327	25.495
1750	72.81	0.283	No	No		26.334	0.335	0.335	26.334
1760	58.129	0.288	No	No		1.186	0.304	0.304	1.186
1770	67.581	0.322	No	No		42.822	0.284	No	No
1780	40.89	0.374	No	No		48.904	0.331	No	No
1790	47.902	0.335	No	No		50.928	0.425	No	No
1800	64.609	0.364	No	No		47.613	0.37	No	No
1810	46.9	0.359	No	No		24.545	0.275	0.275	24.545
1820	49.393	0.318	No	No		60.503	0.328	No	No
1830	39.295	0.321	No	No		20.316	0.293	0.293	20.316
1840	64.885	0.292	No	No		6.296	0.29	0.29	6.296
1850	66.371	0.336	No	No		36.802	0.366	No	No
1860	45.45	0.314	No	No		10.569	0.291	0.291	10.569
1870	57.656	0.336	No	No		54.896	0.334	No	No
1880	30.389	0.347	No	No		38.626	0.288	No	No
1890	66.627	0.358	No	No		58.158	0.419	No	No
1900	49.444	0.324	No	No		55.313	0.438	No	No
1910	45.708	0.357	No	No		19.586	0.318	0.318	19.586
1920	48.532	0.31	No	No		19.628	0.304	0.304	19.628
1930	43.433	0.344	No	No		5.623	0.285	0.285	5.623
1940	38.366	0.316	No	No		12.741	0.292	0.292	12.741
1950	59.967	0.339	No	No		13.891	0.285	0.285	13.891
1960	53.84	0.348	No	No		19.237	0.319	0.319	19.237
1970	64.214	0.36	No	No		4.957	0.294	0.294	4.957
1980	65.664	0.299	No	No		14.014	0.331	0.331	14.014
1990	40.983	0.316	No	No		15.015	0.277	0.277	15.015
2000	58.764	0.322	No	No		11.503	0.315	0.315	11.503
2010	48.139	0.299	No	No		19.579	0.29	0.29	19.579
2020	43.606	0.331	No	No		9.663	0.273	0.273	9.663
2030	40.358	0.329	No	No		22.22	0.283	0.283	22.22
2040	30.451	0.281	No	No		9.319	0.297	0.297	9.319
2050	70.387	0.327	No	No		16.426	0.312	0.312	16.426
2060	65.24	0.328	No	No		11.988	0.28	0.28	11.988
2070	53.743	0.316	No	No		1.587	0.275	0.275	1.587
2080	53.982	0.3	No	No		0.274	0.284	0.284	0.274
2090	54.833	0.327	No	No		8.127	0.273	0.273	8.127
2100	47.92	0.314	No	No		29.878	0.302	0.302	29.878
2110	43.451	0.291	No	No		11.619	0.282	0.282	11.619
2120	51.233	0.291	No	No		6.948	0.301	0.301	6.948
2130	50.991	0.308	No	No		19.426	0.268	0.268	19.426
2140	58.41	0.327	No	No		20.015	0.281	0.281	20.015
2150	55.388	0.322	No	No		8.017	0.287	0.287	8.017
2160	66.184	0.296	No	No		6.153	0.28	0.28	6.153
2170	69.21	0.396	No	No		10.328	0.277	0.277	10.328
2180	67.648	0.362	No	No		23.243	0.28	0.28	23.243
2190	58.466	0.307	No	No		8.07	0.352	No	No
2200	13.478	0.283	0.283	13.478		37.046	0.295	No	No
2210	39.801	0.305	No	No		19.529	0.339	0.339	19.529
2220	12.865	0.329	0.329	12.865		7.913	0.286	0.286	7.913
2230	26.485	0.292	0.292	26.485		35.768	0.353	No	No
2240	60.322	0.336	No	No		42.003	0.319	No	No
2250	22.404	0.295	0.295	22.404		63.328	0.328	No	No
2260	12.797	0.304	0.304	12.797		65.699	0.331	No	No
2270	50.981	0.32	No	No		60.374	0.292	No	No
2280	16.101	0.306	0.306	16.101		63.06	0.343	No	No
2290	58.46	0.331	No	No		50.394	0.323	No	No
2300	45.529	0.35	No	No		46.541	0.38	No	No
2310	42.517	0.312	No	No		12.547	0.317	0.317	12.547
2320	37.68	0.347	No	No		56.068	0.288	No	No
2330	57.877	0.315	No	No		60.349	0.298	No	No
2340	59.644	0.319	No	No		24.063	0.323	0.323	24.063
2350	43.8	0.359	No	No		31.704	0.316	No	No
2360	59.014	0.326	No	No		10.648	0.295	0.295	10.648
2370	23.356	0.343	0.343	23.356		9.965	0.29	0.29	9.965
2380	23.624	0.342	0.342	23.624		20.452	0.32	0.32	20.452
2390	37.873	0.303	No	No		49.865	0.362	No	No
2400	48.524	0.345	No	No		52.831	0.348	No	No
2410	21.227	0.322	0.322	21.227		62.824	0.307	No	No
2420	44.403	0.304	No	No		18.08	0.299	0.299	18.08
2430	55.562	0.328	No	No		69.413	0.313	No	No
2440	48.567	0.308	No	No		66.47	0.299	No	No
2450	43.958	0.358	No	No		44.205	0.329	No	No
2460	42.211	0.378	No	No		47.746	0.285	No	No
2470	36.421	0.336	No	No		37.763	0.366	No	No
2480	46.535	0.383	No	No		55.61	0.29	No	No
2490	49.181	0.339	No	No		29.961	0.272	0.272	29.961
2500	43.761	0.34	No	No		52.423	0.34	No	No
2510	59.469	0.339	No	No		14.964	0.296	0.296	14.964
2520	37.864	0.324	No	No		61.166	0.287	No	No
2530	46.841	0.365	No	No		13.863	0.287	0.287	13.863
2540	17.563	0.37	No	No		21.244	0.277	0.277	21.244
2550	35.576	0.374	No	No		2.976	0.267	0.267	2.976
2560	44.787	0.378	No	No		23.55	0.309	0.309	23.55
2570	38.014	0.302	No	No		18.801	0.432	No	No
2580	34.077	0.329	No	No		54.049	0.296	No	No
2590	54.987	0.324	No	No		27.653	0.332	0.332	27.653
2600	43.15	0.336	No	No		50.295	0.359	No	No
2610	46.295	0.322	No	No		58.458	0.347	No	No
2620	58.526	0.339	No	No		6.588	0.3	0.3	6.588
2630	48.85	0.348	No	No		6.073	0.276	0.276	6.073
2640	55.026	0.347	No	No		14.882	0.276	0.276	14.882
2650	50.564	0.34	No	No		20.335	0.318	0.318	20.335
2660	54.634	0.321	No	No		39.52	0.302	No	No
2670	69.129	0.377	No	No		5.915	0.264	0.264	5.915
2680	49.612	0.33	No	No		13.082	0.274	0.274	13.082
2690	64.462	0.35	No	No		27.008	0.374	No	No
2700	51.79	0.323	No	No		27.723	0.281	0.281	27.723
2710	41.109	0.342	No	No		27.345	0.273	0.273	27.345
2720	64.81	0.313	No	No		2.816	0.291	0.291	2.816
2730	18.758	0.332	0.332	18.758		54.892	0.323	No	No
2740	40.945	0.329	No	No		42.485	0.411	No	No
2750	53.412	0.37	No	No		35.469	0.449	No	No
2760	33.952	0.377	No	No		29.017	0.408	No	No
2770	35.004	0.339	No	No		75.626	0.468	No	No
2780	42.179	0.315	No	No		41.048	0.44	No	No
2790	59.256	0.341	No	No		75.24	0.432	No	No
2800	59.582	0.363	No	No		36.797	0.44	No	No
2810	55.699	0.353	No	No		42.775	0.401	No	No
2820	44.065	0.325	No	No		35.091	0.478	No	No
2830	40.606	0.345	No	No		20.74	0.478	No	No
2840	53.173	0.335	No	No		48.836	0.455	No	No
2850	56.002	0.308	No	No		32.386	0.367	No	No
2860	40.102	0.334	No	No		43.09	0.425	No	No
2870	17.088	0.297	0.297	17.088		26.297	0.311	0.311	26.297
2880	44.776	0.352	No	No		43.017	0.352	No	No
2890	57.486	0.325	No	No		57.857	0.462	No	No
2900	49.092	0.343	No	No		38.846	0.294	No	No
2910	50.501	0.324	No	No		16.883	0.373	No	No
2920	61.693	0.351	No	No		24.172	0.272	0.272	24.172
2930	58.552	0.34	No	No		31	0.311	No	No
2940	52.127	0.348	No	No		14.269	0.308	0.308	14.269
2950	49.105	0.371	No	No		76.426	0.374	No	No
2960	38.135	0.312	No	No		19.042	0.352	No	No
2970	49.7	0.406	No	No		22.279	0.306	0.306	22.279
2980	56.96	0.376	No	No		54.962	0.376	No	No
2990	43.905	0.35	No	No		65.878	0.478	No	No
3000	42.319	0.333	No	No		74.49	0.432	No	No
3010	41.259	0.388	No	No		15.719	0.299	0.299	15.719
3020	56.796	0.321	No	No		21.264	0.275	0.275	21.264
3030	9.056	0.374	No	No		25.992	0.365	No	No
3040	13.724	0.34	0.34	13.724		12.792	0.314	0.314	12.792
3050	10.186	0.291	0.291	10.186		9.423	0.342	0.342	9.423
3060	41.757	0.296	No	No		60.859	0.426	No	No
3070	43.378	0.317	No	No		55.615	0.433	No	No
3080	38.533	0.313	No	No		52.231	0.654	No	No
3090	40.135	0.373	No	No		75.602	0.472	No	No
3100	27.809	0.317	0.317	27.809		79.231	0.508	No	No
3110	52.482	0.345	No	No		73.154	0.434	No	No
3120	50.199	0.332	No	No		80.909	0.517	No	No
3130	50.819	0.381	No	No		70.403	0.399	No	No
3140	42.208	0.343	No	No		110.093	0.429	No	No
3150	46.171	0.32	No	No		77.51	0.434	No	No
3160	48.475	0.374	No	No		86.775	0.514	No	No
3170	58.792	0.321	No	No		68.35	0.481	No	No
3180	56.801	0.327	No	No		73.366	0.542	No	No
3190	40.622	0.306	No	No		75.101	0.487	No	No
3200	60.929	0.31	No	No		73.773	0.485	No	No
3210	40.564	0.366	No	No		87.867	0.479	No	No
3220	46.122	0.346	No	No		73.707	0.4	No	No
3230	64.987	0.311	No	No		68.109	0.421	No	No
3240	24.913	0.324	0.324	24.913		82.8	0.455	No	No
3250	26.932	0.345	0.345	26.932		78.822	0.412	No	No
3260	45.918	0.391	No	No		87.247	0.425	No	No
3270	54.218	0.325	No	No		82.961	0.343	No	No
3280	13.873	0.272	0.272	13.873		100.585	0.409	No	No
3290	13.907	0.287	0.287	13.907		72.377	0.443	No	No
3300	46.295	0.36	No	No		83.791	0.406	No	No
3310	50.364	0.296	No	No		89.255	0.485	No	No
3320	45.298	0.335	No	No		83.153	0.442	No	No
3330	54.155	0.307	No	No		99.207	0.428	No	No
3340	58.357	0.359	No	No		63.705	0.431	No	No
3350	48.638	0.365	No	No		61.816	0.422	No	No
3360	39.704	0.329	No	No		66.494	0.409	No	No
3370	2.306	0.269	0.269	2.306		49.203	0.474	No	No
3380	11.27	0.28	0.28	11.27		76.152	0.524	No	No
3390	53.441	0.34	No	No		45.656	0.571	No	No
3400	52.811	0.324	No	No		76.468	0.48	No	No
3410	53.117	0.285	No	No		78.382	0.452	No	No
3420	55.683	0.351	No	No		52.099	0.442	No	No
3430	58.833	0.33	No	No		58.27	0.448	No	No
3440	48.661	0.311	No	No		60.071	0.476	No	No
3450	54.577	0.31	No	No		33.79	0.387	No	No
3460	58.149	0.294	No	No		79.898	0.456	No	No
3470	52.695	0.334	No	No		52.28	0.491	No	No
3480	54.581	0.319	No	No		40.71	0.358	No	No
3490	39.797	0.3	No	No		86.694	0.405	No	No
3500	60.807	0.318	No	No		56.783	0.41	No	No
3510	56.285	0.299	No	No		72.639	0.461	No	No
3520	43.189	0.302	No	No		84.549	0.403	No	No
3530	60.645	0.316	No	No		66.914	0.503	No	No
3540	53.382	0.309	No	No		61.028	0.501	No	No
3550	58.027	0.346	No	No		44.089	0.437	No	No
3560	43.964	0.306	No	No		82.907	0.509	No	No
3570	58.314	0.298	No	No		77.57	0.514	No	No
3580	62.447	0.326	No	No		101.798	0.457	No	No
3590	55.158	0.313	No	No		68.269	0.434	No	No
3600	49.453	0.289	No	No		84.712	0.478	No	No
3610	74.134	0.297	No	No		77.655	0.513	No	No
3620	45.466	0.285	No	No		103.839	0.454	No	No
3630	41.066	0.321	No	No		84.991	0.432	No	No
3640	55.93	0.285	No	No		71.055	0.544	No	No
3650	55.326	0.286	No	No		75.647	0.484	No	No
3660	93.539	0.311	No	No		75.389	0.423	No	No
3670	72.773	0.375	No	No		76.438	0.406	No	No
3680	70.879	0.335	No	No		71.966	0.488	No	No
3690	56.308	0.318	No	No		92.588	0.511	No	No
3700	64.501	0.327	No	No		70.712	0.465	No	No
3710	85.758	0.339	No	No		95.003	0.445	No	No
3720	87.57	0.312	No	No		86.676	0.371	No	No
3730	97.474	0.369	No	No		72.333	0.395	No	No
3740	52.721	0.346	No	No		78.774	0.451	No	No
3750	68.242	0.313	No	No		70.603	0.485	No	No
3760	66.039	0.303	No	No		80.943	0.456	No	No
3770	48.186	0.321	No	No		83.061	0.418	No	No
3780	56.014	0.43	No	No		72.072	0.45	No	No
3790	46.028	0.299	No	No		99.233	0.423	No	No
3800	81.568	0.321	No	No		73.692	0.418	No	No
3810	71.898	0.36	No	No		78.712	0.54	No	No
3820	61.496	0.306	No	No		85.309	0.476	No	No
3830	74.292	0.338	No	No		59.856	0.403	No	No
3840	78.831	0.323	No	No		81.494	0.427	No	No
3850	67.914	0.362	No	No		78.496	0.49	No	No
3860	66.411	0.308	No	No		82.817	0.505	No	No
3870	64.216	0.324	No	No		72.256	0.528	No	No
3880	59.008	0.345	No	No		60.833	0.5	No	No
3890	50.097	0.365	No	No		84.191	0.43	No	No
3900	48.035	0.337	No	No		71.304	0.448	No	No
3910	56.585	0.34	No	No		93.309	0.407	No	No
3920	66.145	0.343	No	No		89.346	0.386	No	No
3930	53.592	0.311	No	No		74.602	0.554	No	No
3940	33.623	0.44	No	No		70.288	0.452	No	No
3950	50.261	0.365	No	No		78.762	0.487	No	No
3960	45.909	0.41	No	No		86.221	0.427	No	No
3970	55.044	0.406	No	No		82.971	0.376	No	No
3980	36.466	0.494	No	No		53.643	0.48	No	No
3990	54.955	0.403	No	No		84.27	0.435	No	No
4000	58.796	0.392	No	No		63.567	0.507	No	No
4010	41.604	0.434	No	No		70.532	0.438	No	No
4020	62.183	0.406	No	No		68.768	0.357	No	No
4030	57.762	0.372	No	No		69.341	0.431	No	No
4040	57.668	0.365	No	No		77.241	0.39	No	No
4050	30.473	0.468	No	No		58.606	0.47	No	No
4060	57.189	0.399	No	No		67.147	0.444	No	No
4070	52.186	0.427	No	No		62.234	0.411	No	No
4080	60.117	0.379	No	No		84.482	0.45	No	No
4090	49.751	0.346	No	No		28.002	0.474	No	No
4100	45.525	0.446	No	No		35.99	0.433	No	No
4110	39.991	0.402	No	No		62.787	0.382	No	No
4120	41.209	0.363	No	No		50.164	0.418	No	No
4130	48.984	0.412	No	No		36.42	0.433	No	No
4140	43.595	0.409	No	No		42.393	0.452	No	No
4150	48.81	0.361	No	No		63.275	0.455	No	No
4160	50.882	0.366	No	No		69.959	0.373	No	No
4170	59.235	0.38	No	No		31.598	0.447	No	No
4180	45.31	0.295	No	No		58.284	0.378	No	No
4190	99.441	0.4	No	No		48.067	0.457	No	No
4200	46.897	0.373	No	No		57.385	0.371	No	No
4210	19.037	0.461	No	No		31.439	0.385	No	No
4220	54.462	0.399	No	No		52.015	0.404	No	No
4230	46.459	0.334	No	No		48.43	0.373	No	No
4240	60.872	0.47	No	No		57.259	0.469	No	No
4250	62.268	0.463	No	No		26.216	0.476	No	No
4260	66.26	0.439	No	No		18.271	0.492	No	No
4270	64.801	0.386	No	No		44.485	0.429	No	No
4280	48.232	0.448	No	No		57.449	0.54	No	No
4290	63.692	0.366	No	No		55.121	0.416	No	No
4300	13.537	0.295	0.295	13.537		53.745	0.416	No	No
4310	24.249	0.338	0.338	24.249		39.276	0.435	No	No
4320	16.674	0.32	0.32	16.674		61.62	0.405	No	No
4330	37.48	0.325	No	No		80.989	0.475	No	No
4340	55.446	0.374	No	No		73.576	0.459	No	No
4350	30.514	0.352	No	No		64.082	0.433	No	No
4360	46.287	0.315	No	No		47.463	0.42	No	No
4370	32.993	0.321	No	No		51.561	0.438	No	No
4380	42.581	0.368	No	No		70.56	0.511	No	No
4390	50.517	0.337	No	No		51.063	0.377	No	No
4400	48.107	0.393	No	No		51.538	0.394	No	No
4410	3.968	0.27	0.27	3.968		60.395	0.402	No	No
4420	12.231	0.293	0.293	12.231		63.825	0.461	No	No
4430	43.003	0.341	No	No		72.16	0.446	No	No
4440	39.469	0.363	No	No		37.533	0.438	No	No
4450	6.972	0.323	0.323	6.972		24.476	0.402	No	No
4460	46.603	0.308	No	No		92.508	0.426	No	No
4470	13.717	0.304	0.304	13.717		72.381	0.402	No	No
4480	75.207	0.302	No	No		71.634	0.374	No	No
4490	18.15	0.3	0.3	18.15		59.451	0.391	No	No
4500	58.723	0.338	No	No		56.664	0.508	No	No
4510	14.117	0.306	0.306	14.117		59.921	0.531	No	No
4520	45.554	0.405	No	No		73.247	0.409	No	No
4530	50.584	0.352	No	No		73.358	0.436	No	No
4540	16.303	0.295	0.295	16.303		61.394	0.358	No	No
4550	45.298	0.301	No	No		23.389	0.374	No	No
4560	46.337	0.335	No	No		20.921	0.333	0.333	20.921
4570	12.148	0.29	0.29	12.148		22.206	0.319	0.319	22.206
4580	46.931	0.316	No	No		64.237	0.406	No	No
4590	18.346	0.345	0.345	18.346		103.914	0.463	No	No
4600	21.135	0.308	0.308	21.135		57.979	0.425	No	No
4610	37.907	0.323	No	No		69.304	0.47	No	No
4620	45.728	0.337	No	No		79.339	0.41	No	No
4630	53.67	0.354	No	No		77.505	0.458	No	No
4640	45.268	0.348	No	No		58.956	0.519	No	No
4650	51.351	0.295	No	No		101.46	0.431	No	No
4660	44.406	0.324	No	No		73.617	0.446	No	No
4670	36.219	0.356	No	No		84.577	0.468	No	No
4680	47.275	0.306	No	No		65.189	0.516	No	No
4690	53.767	0.294	No	No		74.155	0.45	No	No
4700	67.761	0.313	No	No		83.607	0.535	No	No
4710	39.261	0.335	No	No		54.493	0.44	No	No
4720	46.891	0.44	No	No		39.631	0.477	No	No
4730	47.396	0.411	No	No		42.588	0.479	No	No
4740	53.631	0.364	No	No		72.204	0.433	No	No
4750	48.101	0.406	No	No		73.962	0.432	No	No
4760	37.73	0.45	No	No		63.148	0.496	No	No
4770	56.5	0.362	No	No		95.329	0.417	No	No
4780	58.496	0.285	No	No		78.01	0.394	No	No
4790	58.145	0.327	No	No		69.036	0.447	No	No
4800	64.179	0.343	No	No		71.582	0.463	No	No
4810	35.173	0.347	No	No		27.465	0.335	0.335	27.465
4820	67.345	0.351	No	No		50.489	0.399	No	No
4830	65.438	0.301	No	No		76.776	0.498	No	No
4840	73.819	0.324	No	No		94.931	0.491	No	No
4850	51.776	0.316	No	No		63.01	0.454	No	No
4860	46.1	0.289	No	No		47.273	0.374	No	No
4870	51.948	0.303	No	No		63.057	0.374	No	No
4880	49.636	0.31	No	No		59.152	0.436	No	No
4890	59.664	0.325	No	No		80.266	0.497	No	No
4900	27.878	0.301	0.301	27.878		76.539	0.414	No	No
4910	47.508	0.315	No	No		75.049	0.497	No	No
4920	53.946	0.353	No	No		62.505	0.5	No	No
4930	53.445	0.339	No	No		62.549	0.442	No	No
4940	50.339	0.323	No	No		84.139	0.478	No	No
4950	6.624	0.329	0.329	6.624		56.166	0.496	No	No
4960	30.129	0.329	No	No		67.342	0.55	No	No
4970	2.167	0.296	0.296	2.167		60.233	0.562	No	No
4980	61.227	0.318	No	No		84.835	0.534	No	No
4990	50.797	0.338	No	No		43.35	0.46	No	No
5000	74.505	0.368	No	No		72.31	0.473	No	No
5010	34.895	0.336	No	No		59.697	0.376	No	No
5020	47.326	0.352	No	No		24.858	0.326	0.326	24.858
5030	48.766	0.35	No	No		56.511	0.366	No	No
5040	57.622	0.322	No	No		38.153	0.551	No	No
5050	23.801	0.268	0.268	23.801		63.964	0.502	No	No
5060	58.571	0.348	No	No		27.131	0.525	No	No
5070	26.909	0.303	0.303	26.909		46.512	0.508	No	No
5080	22.188	0.307	0.307	22.188		90.901	0.456	No	No
5090	56.262	0.323	No	No		49.521	0.499	No	No
5100	60.596	0.313	No	No		42.625	0.489	No	No
5110	60.488	0.308	No	No		46.702	0.448	No	No
5120	63.414	0.307	No	No		35.474	0.42	No	No
5130	69.566	0.354	No	No		53.319	0.394	No	No
5140	43.793	0.318	No	No		59.42	0.466	No	No
5150	67.884	0.307	No	No		67.852	0.471	No	No
5160	55.04	0.295	No	No		61.983	0.412	No	No
5170	56.221	0.308	No	No		46.737	0.446	No	No
5180	18.67	0.317	0.317	18.67		71.096	0.42	No	No
5190	49.601	0.364	No	No		67.408	0.356	No	No
5200	57.454	0.309	No	No		58.994	0.447	No	No
5210	49.748	0.318	No	No		87.913	0.496	No	No
5220	53.946	0.307	No	No		33.871	0.48	No	No
5230	41.428	0.337	No	No		65.606	0.441	No	No
5240	56.852	0.311	No	No		24.507	0.347	0.347	24.507
5250	19.251	0.305	0.305	19.251		53.774	0.383	No	No
5260	45.801	0.345	No	No		28.869	0.511	No	No
5270	49.251	0.352	No	No		51.168	0.42	No	No
5280	20.427	0.275	0.275	20.427		27.291	0.462	No	No
5290	11.009	0.307	0.307	11.009		67.706	0.487	No	No
5300	45.067	0.326	No	No		46.023	0.404	No	No
5310	50.779	0.348	No	No		34.727	0.43	No	No
5320	44.84	0.32	No	No		53.097	0.397	No	No
5330	38.397	0.328	No	No		45.067	0.392	No	No
5340	58.4	0.325	No	No		15.023	0.299	0.299	15.023
5350	44.009	0.324	No	No		2.263	0.262	0.262	2.263
5360	53.325	0.301	No	No		29.076	0.28	0.28	29.076
5370	36.821	0.318	No	No		23.778	0.332	0.332	23.778
5380	45.651	0.32	No	No		20.795	0.343	0.343	20.795
5390	49.849	0.302	No	No		81.722	0.387	No	No
5400	18.927	0.308	0.308	18.927		71.295	0.44	No	No
5410	38.517	0.318	No	No		69.333	0.375	No	No
5420	36.697	0.315	No	No		17.045	0.336	0.336	17.045
5430	25.985	0.296	0.296	25.985		56.8	0.374	No	No
5440	54.253	0.313	No	No		57.872	0.438	No	No
5450	15.743	0.266	0.266	15.743		68.714	0.406	No	No
5460	9.799	0.298	0.298	9.799		55.392	0.31	No	No
5470	46.748	0.301	No	No		32.391	0.399	No	No
5480	59.852	0.297	No	No		57.927	0.41	No	No
5490	15.493	0.287	0.287	15.493		47.772	0.366	No	No
5500	6.666	0.276	0.276	6.666		70.488	0.304	No	No
5510	14.796	0.264	0.264	14.796		33.099	0.362	No	No
5520	17.129	0.287	0.287	17.129		54.735	0.403	No	No
5530	19.534	0.332	0.332	19.534		50.158	0.323	No	No
5540	6.933	0.258	0.258	6.933		36.894	0.399	No	No
5550	15.48	0.279	0.279	15.48		40.508	0.426	No	No
5560	16.479	0.289	0.289	16.479		71.924	0.469	No	No
5570	29.611	0.286	0.286	29.611		52.944	0.456	No	No
5580	4.996	0.284	0.284	4.996		60.952	0.419	No	No
5590	24.342	0.281	0.281	24.342		76.605	0.504	No	No
5600	42.025	0.288	No	No		104.137	0.462	No	No
5610	4.741	0.287	0.287	4.741		71.713	0.412	No	No
5620	17.448	0.279	0.279	17.448		99.391	0.444	No	No
5630	9.632	0.284	0.284	9.632		115.657	0.502	No	No
5640	11.521	0.259	0.259	11.521		80.991	0.464	No	No
5650	7.378	0.273	0.273	7.378		84.645	0.442	No	No
5660	13.624	0.315	0.315	13.624		80.866	0.458	No	No
5670	17.042	0.262	0.262	17.042		89.136	0.437	No	No
5680	2.401	0.278	0.278	2.401		83.478	0.453	No	No
5690	21.035	0.275	0.275	21.035		97.244	0.469	No	No
5700	11.257	0.286	0.286	11.257		82.642	0.448	No	No
5710	8.678	0.261	0.261	8.678		66.287	0.457	No	No
5720	18.696	0.279	0.279	18.696		60.344	0.38	No	No
5730	6.128	0.295	0.295	6.128		75.796	0.403	No	No
5740	12.119	0.277	0.277	12.119		81.456	0.454	No	No
5750	4.308	0.288	0.288	4.308		87.008	0.443	No	No
5760	10.297	0.263	0.263	10.297		81.441	0.45	No	No
5770	21.502	0.281	0.281	21.502		84.9	0.459	No	No
5780	34.036	0.337	No	No		66.693	0.513	No	No
5790	9.352	0.265	0.265	9.352		66.707	0.454	No	No
5800	10.492	0.281	0.281	10.492		93.951	0.387	No	No
5810	6.345	0.286	0.286	6.345		89.963	0.409	No	No
5820	15.269	0.294	0.294	15.269		78.319	0.44	No	No
5830	23.059	0.263	0.263	23.059		72.328	0.419	No	No
5840	29.698	0.319	0.319	29.698		80.482	0.448	No	No
5850	48.959	0.311	No	No		49.458	0.468	No	No
5860	58.079	0.34	No	No		84.983	0.47	No	No
5870	57.25	0.292	No	No		70.974	0.406	No	No
5880	66.907	0.295	No	No		86.586	0.49	No	No
5890	64.119	0.299	No	No		76.585	0.463	No	No
5900	17.5	0.27	0.27	17.5		87.224	0.431	No	No
5910	8.565	0.271	0.271	8.565		89.398	0.452	No	No
5920	63.144	0.335	No	No		96.718	0.429	No	No
5930	33.615	0.308	No	No		64.677	0.397	No	No
5940	43.039	0.31	No	No		71.329	0.447	No	No
5950	54.021	0.314	No	No		76.454	0.484	No	No
5960	54.007	0.333	No	No		75.772	0.497	No	No
5970	46.076	0.33	No	No		78.482	0.439	No	No
5980	58.063	0.318	No	No		61.78	0.47	No	No
5990	51.164	0.325	No	No		96.861	0.428	No	No
6000	63.755	0.309	No	No		80.982	0.521	No	No
6010	50.337	0.295	No	No		89.677	0.537	No	No
6020	64.431	0.294	No	No		105.357	0.429	No	No
6030	51.934	0.345	No	No		78.043	0.491	No	No
6040	54.252	0.304	No	No		97.128	0.489	No	No
6050	69.349	0.33	No	No		57.126	0.494	No	No
6060	65.756	0.305	No	No		76.76	0.472	No	No
6070	63.191	0.295	No	No		73.096	0.447	No	No
6080	60.58	0.303	No	No		87.802	0.523	No	No
6090	56.46	0.316	No	No		86.067	0.473	No	No
6100	48.803	0.291	No	No		77.72	0.506	No	No
6110	56.612	0.314	No	No		77.065	0.519	No	No
6120	66.62	0.336	No	No		76.976	0.442	No	No
6130	45.179	0.325	No	No		78.093	0.456	No	No
6140	57.021	0.328	No	No		93.94	0.428	No	No
6150	73.32	0.321	No	No		22.809	0.307	0.307	22.809
6160	62.677	0.302	No	No		32.29	0.314	No	No
6170	71.2	0.337	No	No		83.288	0.391	No	No
6180	66.662	0.329	No	No		65.849	0.47	No	No
6190	56.099	0.315	No	No		70.754	0.41	No	No
6200	77.339	0.293	No	No		82.24	0.467	No	No
6210	52.283	0.334	No	No		66.948	0.472	No	No
6220	61.429	0.306	No	No		89.098	0.435	No	No
6230	55.922	0.315	No	No		79.119	0.418	No	No
6240	59.288	0.313	No	No		93.749	0.471	No	No
6250	63.14	0.335	No	No		58.97	0.461	No	No
6260	78.644	0.362	No	No		74.64	0.469	No	No
6270	57.404	0.299	No	No		70.311	0.47	No	No
6280	77.02	0.297	No	No		72.041	0.483	No	No
6290	63.181	0.315	No	No		74.217	0.465	No	No
6300	54.763	0.307	No	No		49.446	0.507	No	No
6310	70.218	0.299	No	No		48.851	0.504	No	No
6320	55.349	0.294	No	No		43.277	0.49	No	No
6330	70.654	0.328	No	No		55.484	0.454	No	No
6340	55.445	0.295	No	No		61.121	0.49	No	No
6350	51.971	0.315	No	No		43.717	0.493	No	No
6360	47.926	0.297	No	No		62.481	0.501	No	No
6370	60.001	0.319	No	No		28.94	0.447	No	No
6380	62.057	0.306	No	No		76.329	0.474	No	No
6390	68.626	0.296	No	No		86.552	0.522	No	No
6400	62.44	0.308	No	No		66.34	0.452	No	No
6410	56.841	0.311	No	No		93.497	0.465	No	No
6420	73.674	0.288	No	No		79.742	0.482	No	No
6430	56.335	0.349	No	No		77.918	0.505	No	No
6440	67.045	0.293	No	No		60.639	0.447	No	No
6450	62.83	0.375	No	No		57.259	0.528	No	No
6460	63.952	0.302	No	No		87.443	0.439	No	No
6470	58.088	0.314	No	No		62.25	0.501	No	No
6480	59.315	0.305	No	No		58.738	0.405	No	No
6490	68.431	0.313	No	No		81.505	0.481	No	No
6500	47.673	0.301	No	No		87.565	0.525	No	No
6510	44.95	0.321	No	No		85.821	0.448	No	No
6520	60.784	0.337	No	No		96.703	0.422	No	No
6530	66.407	0.294	No	No		78.695	0.532	No	No
6540	60.084	0.324	No	No		62.364	0.408	No	No
6550	70.176	0.32	No	No		81.202	0.463	No	No
6560	63.603	0.32	No	No		67.06	0.487	No	No
6570	71.845	0.314	No	No		87.124	0.476	No	No
6580	47.743	0.317	No	No		77.831	0.464	No	No
6590	55.062	0.314	No	No		67.475	0.455	No	No
6600	74.018	0.323	No	No		86.214	0.577	No	No
6610	63.081	0.281	No	No		74.99	0.478	No	No
6620	50.501	0.296	No	No		69.459	0.486	No	No
6630	53.955	0.29	No	No		80.991	0.472	No	No
6640	62.568	0.305	No	No		79.59	0.474	No	No
6650	56.516	0.301	No	No		78.525	0.512	No	No
6660	58.376	0.313	No	No		70.288	0.449	No	No
6670	61.63	0.311	No	No		74.313	0.489	No	No
6680	60.166	0.298	No	No		87.97	0.447	No	No
6690	45.539	0.321	No	No		86.669	0.451	No	No
6700	68.607	0.319	No	No		61.128	0.441	No	No
6710	58.181	0.299	No	No		64.323	0.51	No	No
6720	62.131	0.372	No	No		52.356	0.616	No	No
6730	9.329	0.264	0.264	9.329		31.846	0.434	No	No
6740	45.742	0.301	No	No		76.931	0.542	No	No
6750	51.814	0.308	No	No		49.487	0.496	No	No
6760	51.641	0.301	No	No		52.081	0.512	No	No
6770	11.364	0.272	0.272	11.364		41.218	0.527	No	No
6780	66.271	0.282	No	No		67.52	0.38	No	No
6790	28.362	0.287	0.287	28.362		52.853	0.561	No	No
6800	54.088	0.321	No	No		48.659	0.352	No	No
6810	56.177	0.328	No	No		18.801	0.499	No	No
6820	55.587	0.287	No	No		32.926	0.464	No	No
6830	61.312	0.316	No	No		25.195	0.508	No	No
6840	57.394	0.321	No	No		80.907	0.49	No	No
6850	64.583	0.305	No	No		48.175	0.477	No	No
6860	55.126	0.324	No	No		37.495	0.463	No	No
6870	67.841	0.3	No	No		41.961	0.462	No	No
6880	65.122	0.32	No	No		55.17	0.514	No	No
6890	63.371	0.327	No	No		73.709	0.472	No	No
6900	60.986	0.288	No	No		60.534	0.445	No	No
6910	53.336	0.347	No	No		61.898	0.495	No	No
6920	89.303	0.285	No	No		6.152	0.566	No	No
6930	52.488	0.308	No	No		110.632	0.533	No	No
6940	68.694	0.308	No	No		87.981	0.491	No	No
6950	47.328	0.285	No	No		25.025	0.547	No	No
6960	50.509	0.278	No	No		57.537	0.545	No	No
6970	68.101	0.295	No	No		74.501	0.514	No	No
6980	56.821	0.322	No	No		68.747	0.539	No	No
6990	54.596	0.305	No	No		58.793	0.47	No	No
7000	54.537	0.296	No	No		72.699	0.475	No	No
7010	71.703	0.301	No	No		61.447	0.391	No	No
7020	61.637	0.278	No	No		62.122	0.478	No	No
7030	57.995	0.284	No	No		54.083	0.382	No	No
7040	63.075	0.31	No	No		32.785	0.429	No	No
7050	65.939	0.338	No	No		74.588	0.442	No	No
7060	62.686	0.302	No	No		45.351	0.33	No	No
7070	62.183	0.314	No	No		76.33	0.421	No	No
7080	36.439	0.308	No	No		87.405	0.431	No	No
7090	61.983	0.286	No	No		81.285	0.522	No	No
7100	69.626	0.297	No	No		75.896	0.463	No	No
7110	57.529	0.3	No	No		77.156	0.486	No	No
7120	33.169	0.3	No	No		88.549	0.416	No	No
7130	52.585	0.298	No	No		69.964	0.485	No	No
7140	59.188	0.32	No	No		75.1	0.43	No	No
7150	49.654	0.29	No	No		80.261	0.418	No	No
7160	64.38	0.307	No	No		70.223	0.51	No	No
7170	56.14	0.308	No	No		47.049	0.534	No	No
7180	51.719	0.29	No	No		69.919	0.448	No	No
7190	62.938	0.332	No	No		58.711	0.449	No	No
7200	70.746	0.323	No	No		47.231	0.477	No	No
7210	59.166	0.286	No	No		93.694	0.543	No	No
7220	50.331	0.297	No	No		71.302	0.493	No	No
7230	61.715	0.301	No	No		90.142	0.503	No	No
7240	63.081	0.31	No	No		90.272	0.433	No	No
7250	78.277	0.308	No	No		61.524	0.464	No	No
7260	69.238	0.308	No	No		76.871	0.411	No	No
7270	55.564	0.326	No	No		81.4	0.42	No	No
7280	67.25	0.279	No	No		78.664	0.421	No	No
7290	58.269	0.291	No	No		78.698	0.401	No	No
7300	59.852	0.328	No	No		75.907	0.41	No	No
7310	51.09	0.297	No	No		91.46	0.424	No	No
7320	62.592	0.323	No	No		73.985	0.458	No	No
7330	59.369	0.325	No	No		96.418	0.44	No	No
7340	47.242	0.292	No	No		92.782	0.47	No	No
7350	59.838	0.292	No	No		75.476	0.483	No	No
7360	58.618	0.297	No	No		87.805	0.476	No	No
7370	58.842	0.33	No	No		88.72	0.453	No	No
7380	62.832	0.292	No	No		86.989	0.417	No	No
7390	69.104	0.323	No	No		78.473	0.469	No	No
7400	60.723	0.297	No	No		40.522	0.433	No	No
7410	60.293	0.297	No	No		49.558	0.38	No	No
7420	63.766	0.312	No	No		7.18	0.343	0.343	7.18
7430	53.45	0.294	No	No		91.878	0.581	No	No
7440	59.697	0.296	No	No		92.332	0.55	No	No
7450	66.787	0.347	No	No		76.304	0.439	No	No
7460	49.04	0.283	No	No		95.488	0.456	No	No
7470	55.778	0.279	No	No		87.433	0.504	No	No
7480	62.015	0.289	No	No		87.446	0.435	No	No
7490	61.552	0.291	No	No		103.421	0.446	No	No
7500	59.908	0.291	No	No		87.361	0.467	No	No
7510	55.108	0.315	No	No		76.582	0.442	No	No
7520	71.842	0.301	No	No		80.529	0.486	No	No
7530	65.364	0.358	No	No		91.819	0.497	No	No
7540	62.123	0.322	No	No		95.467	0.493	No	No
7550	66.664	0.315	No	No		78.016	0.427	No	No
7560	58.276	0.314	No	No		89.392	0.466	No	No
7570	65.859	0.29	No	No		79.843	0.461	No	No
7580	51.399	0.3	No	No		79.843	0.459	No	No
7590	72.288	0.304	No	No		73.734	0.436	No	No
7600	62.267	0.311	No	No		78.294	0.482	No	No
7610	53.88	0.318	No	No		74.086	0.488	No	No
7620	66.821	0.304	No	No		74.39	0.427	No	No
7630	58.244	0.287	No	No		72.025	0.43	No	No
7640	65.93	0.303	No	No		46.848	0.424	No	No
7650	54.74	0.342	No	No		66.582	0.363	No	No
7660	53.887	0.304	No	No		83.399	0.488	No	No
7670	65.188	0.308	No	No		82.724	0.47	No	No
7680	60.082	0.315	No	No		66.022	0.466	No	No
7690	64.715	0.313	No	No		76.872	0.489	No	No
7700	52.887	0.292	No	No		85.295	0.453	No	No
7710	59.063	0.303	No	No		58.566	0.419	No	No
7720	65.877	0.307	No	No		87.982	0.439	No	No
7730	53.17	0.319	No	No		59.237	0.381	No	No
7740	51.972	0.296	No	No		42.726	0.412	No	No
7750	52.828	0.332	No	No		33.695	0.303	No	No
7760	61.511	0.312	No	No		24.517	0.344	0.344	24.517
7770	62.671	0.313	No	No		19.191	0.29	0.29	19.191
7780	68.035	0.277	No	No		7.611	0.312	0.312	7.611
7790	61.174	0.315	No	No		25.943	0.276	0.276	25.943
7800	56.881	0.312	No	No		31.616	0.295	No	No
7810	57.235	0.276	No	No		76.401	0.353	No	No
7820	43.367	0.303	No	No		57.79	0.364	No	No
7830	65.53	0.286	No	No		3.642	0.316	0.316	3.642
7840	70.518	0.326	No	No		16.863	0.329	0.329	16.863
7850	65.407	0.316	No	No		1.833	0.278	0.278	1.833
7860	53.532	0.295	No	No		6.695	0.317	0.317	6.695
7870	67.857	0.304	No	No		17.454	0.301	0.301	17.454
7880	64.827	0.3	No	No		3.06	0.319	0.319	3.06
7890	46.119	0.345	No	No		19.504	0.295	0.295	19.504
7900	55.094	0.275	No	No		8.23	0.291	0.291	8.23
7910	62.786	0.338	No	No		8.35	0.302	0.302	8.35
7920	45.076	0.281	No	No		64.504	0.437	No	No
7930	50.759	0.304	No	No		20.604	0.302	0.302	20.604
7940	56.454	0.311	No	No		11.012	0.297	0.297	11.012
7950	52.541	0.307	No	No		9.097	0.298	0.298	9.097
7960	63.694	0.286	No	No		7.93	0.354	No	No
7970	46.926	0.283	No	No		4.802	0.272	0.272	4.802
7980	12.154	0.277	0.277	12.154		22.378	0.278	0.278	22.378
7990	54.428	0.323	No	No		15.717	0.325	0.325	15.717
8000	56.505	0.317	No	No		4.728	0.268	0.268	4.728
8010	66.264	0.311	No	No		20.062	0.327	0.327	20.062
8020	60.958	0.318	No	No		17.43	0.293	0.293	17.43
8030	55.694	0.336	No	No		20.209	0.298	0.298	20.209
8040	58.117	0.295	No	No		34.501	0.36	No	No
8050	63.904	0.318	No	No		2.861	0.272	0.272	2.861
8060	63.11	0.288	No	No		6.834	0.276	0.276	6.834
8070	70.09	0.321	No	No		11.512	0.299	0.299	11.512
8080	61.91	0.301	No	No		15.949	0.296	0.296	15.949
8090	55.319	0.297	No	No		25.086	0.328	0.328	25.086
8100	61.915	0.32	No	No		56.208	0.398	No	No
8110	73.98	0.291	No	No		57.093	0.35	No	No
8120	65.222	0.287	No	No		75.566	0.435	No	No
8130	58.667	0.318	No	No		77.202	0.408	No	No
8140	56.847	0.305	No	No		11.247	0.504	No	No
8150	66.649	0.289	No	No		38.461	0.481	No	No
8160	62.695	0.295	No	No		13.62	0.548	No	No
8170	26.281	0.358	No	No		40.456	0.332	No	No
8180	54.959	0.311	No	No		67.714	0.462	No	No
8190	63.384	0.316	No	No		86.443	0.456	No	No
8200	54.267	0.302	No	No		51.695	0.386	No	No
8210	62.939	0.325	No	No		40	0.349	No	No
8220	60.622	0.288	No	No		11.2	0.265	0.265	11.2
8230	67.544	0.329	No	No		40.314	0.449	No	No
8240	60.149	0.284	No	No		74.12	0.424	No	No
8250	68.455	0.307	No	No		53.447	0.408	No	No
8260	61.964	0.306	No	No		54.507	0.416	No	No
8270	78.781	0.311	No	No		69.453	0.42	No	No
8280	67.517	0.288	No	No		65.562	0.425	No	No
8290	58.56	0.354	No	No		62.479	0.362	No	No
8300	53.223	0.331	No	No		27.052	0.422	No	No
8310	69.996	0.303	No	No		54.179	0.4	No	No
8320	65.201	0.283	No	No		68.735	0.389	No	No
8330	66.399	0.297	No	No		67.727	0.428	No	No
8340	55.34	0.311	No	No		55.058	0.418	No	No
8350	66.875	0.328	No	No		62.561	0.416	No	No
8360	73.022	0.279	No	No		61.867	0.372	No	No
8370	61.104	0.287	No	No		27.474	0.358	No	No
8380	73.377	0.304	No	No		51.325	0.423	No	No
8390	69.328	0.326	No	No		22.385	0.565	No	No
8400	56.904	0.306	No	No		30.549	0.457	No	No
8410	54.256	0.312	No	No		35.468	0.406	No	No
8420	87.797	0.357	No	No		42.763	0.429	No	No
8430	57.32	0.297	No	No		59.259	0.373	No	No
8440	63.827	0.297	No	No		23.89	0.468	No	No
8450	64.527	0.274	No	No		44.223	0.443	No	No
8460	48.953	0.333	No	No		73.525	0.429	No	No
8470	54.21	0.31	No	No		22.484	0.406	No	No
8480	75.246	0.315	No	No		44.446	0.427	No	No
8490	66.439	0.274	No	No		62.041	0.397	No	No
8500	67.12	0.281	No	No		81.391	0.364	No	No
8510	64.715	0.31	No	No		10.434	0.296	0.296	10.434
8520	67.696	0.312	No	No		10.348	0.309	0.309	10.348
8530	74.803	0.284	No	No		5.778	0.27	0.27	5.778
8540	63.447	0.304	No	No		17.716	0.299	0.299	17.716
8550	70.72	0.287	No	No		30.958	0.45	No	No
8560	63.945	0.337	No	No		51.215	0.406	No	No
8570	61.355	0.323	No	No		56.028	0.349	No	No
8580	55.983	0.298	No	No		45.042	0.395	No	No
8590	71.802	0.309	No	No		40.738	0.38	No	No
8600	42.592	0.311	No	No		10.547	0.326	0.326	10.547
8610	79.314	0.351	No	No		12.934	0.274	0.274	12.934
8620	63.033	0.281	No	No		34.619	0.414	No	No
8630	64.593	0.328	No	No		55.571	0.357	No	No
8640	63.302	0.326	No	No		9.101	0.346	0.346	9.101
8650	73.087	0.307	No	No		16.647	0.287	0.287	16.647
8660	63.281	0.295	No	No		22.33	0.293	0.293	22.33
8670	44.875	0.329	No	No		11.362	0.295	0.295	11.362
8680	68.98	0.301	No	No		11.797	0.293	0.293	11.797
8690	62.692	0.318	No	No		9.962	0.272	0.272	9.962
8700	54.495	0.316	No	No		19.852	0.329	0.329	19.852
8710	50.491	0.306	No	No		21.415	0.34	0.34	21.415
8720	66.526	0.338	No	No		8.814	0.298	0.298	8.814
8730	52.247	0.325	No	No		4.437	0.295	0.295	4.437
8740	43.4	0.362	No	No		9.252	0.269	0.269	9.252
8750	76.571	0.282	No	No		8.173	0.291	0.291	8.173
8760	55.029	0.296	No	No		16.32	0.296	0.296	16.32
8770	48.427	0.343	No	No		12.548	0.274	0.274	12.548
8780	60.838	0.281	No	No		11.086	0.293	0.293	11.086
8790	53.792	0.369	No	No		7.402	0.291	0.291	7.402
8800	59.115	0.319	No	No		7.834	0.275	0.275	7.834
8810	59.92	0.362	No	No		8.141	0.308	0.308	8.141
8820	58.584	0.341	No	No		8.591	0.282	0.282	8.591
8830	56.225	0.352	No	No		14.231	0.288	0.288	14.231
8840	51.008	0.376	No	No		18.628	0.296	0.296	18.628
8850	58.509	0.343	No	No		28.853	0.286	0.286	28.853
8860	52.591	0.316	No	No		20.016	0.298	0.298	20.016
8870	48.081	0.364	No	No		11.847	0.278	0.278	11.847
8880	51.968	0.398	No	No		3.063	0.325	0.325	3.063
8890	41.117	0.331	No	No		50.441	0.408	No	No
8900	47.621	0.315	No	No		45.039	0.304	No	No
8910	65.529	0.318	No	No		20.197	0.283	0.283	20.197
8920	36.119	0.298	No	No		6.413	0.294	0.294	6.413
8930	22.814	0.298	0.298	22.814		13.62	0.302	0.302	13.62
8940	50.069	0.305	No	No		17.318	0.275	0.275	17.318
8950	57.882	0.327	No	No		14.941	0.295	0.295	14.941
8960	7.162	0.288	0.288	7.162		16.167	0.284	0.284	16.167
8970	16.717	0.343	0.343	16.717		3.154	0.278	0.278	3.154
8980	8.053	0.284	0.284	8.053		11.932	0.274	0.274	11.932
8990	61.883	0.365	No	No		8.265	0.27	0.27	8.265
9000	53.675	0.299	No	No		16.39	0.351	No	No
9010	54.321	0.296	No	No		12.791	0.299	0.299	12.791
9020	70.841	0.316	No	No		11.579	0.267	0.267	11.579
9030	62.042	0.303	No	No		15.713	0.281	0.281	15.713
9040	72.361	0.317	No	No		30.652	0.288	No	No
9050	72.154	0.317	No	No		13.017	0.282	0.282	13.017
9060	68.252	0.322	No	No		10.938	0.321	0.321	10.938
9070	61.671	0.305	No	No		6.885	0.276	0.276	6.885
9080	60.126	0.305	No	No		28.083	0.291	0.291	28.083
9090	36.597	0.319	No	No		7.725	0.288	0.288	7.725
9100	54.852	0.31	No	No		13.268	0.286	0.286	13.268
9110	44.337	0.319	No	No		14.598	0.274	0.274	14.598
9120	51.258	0.312	No	No		28.623	0.299	0.299	28.623
9130	8.802	0.317	0.317	8.802		17.319	0.28	0.28	17.319
9140	75.938	0.33	No	No		10.366	0.278	0.278	10.366
9150	12.657	0.263	0.263	12.657		46.825	0.305	No	No
9160	79.741	0.296	No	No		53.634	0.302	No	No
9170	29.633	0.277	0.277	29.633		56.062	0.307	No	No
9180	59.553	0.303	No	No		53.514	0.345	No	No
9190	51.763	0.321	No	No		60.852	0.298	No	No
9200	50.998	0.321	No	No		57.311	0.303	No	No
9210	66.826	0.339	No	No		46.71	0.292	No	No
9220	47.957	0.321	No	No		48.68	0.289	No	No
9230	54.885	0.322	No	No		62.907	0.334	No	No
9240	59.365	0.305	No	No		57.146	0.327	No	No
9250	47.224	0.311	No	No		64.893	0.363	No	No
9260	70.429	0.314	No	No		64.113	0.323	No	No
9270	54.971	0.318	No	No		36.039	0.359	No	No
9280	33.114	0.334	No	No		28.567	0.322	0.322	28.567
9290	49.322	0.319	No	No		67.592	0.311	No	No
9300	57.861	0.335	No	No		60.757	0.325	No	No
9310	47.11	0.3	No	No		70.554	0.302	No	No
9320	72.096	0.322	No	No		49.07	0.335	No	No
9330	61.846	0.303	No	No		56.571	0.341	No	No
9340	61.302	0.315	No	No		50.605	0.314	No	No
9350	52.723	0.316	No	No		53.308	0.305	No	No
9360	70.553	0.325	No	No		39.517	0.354	No	No
9370	68.637	0.301	No	No		64.257	0.314	No	No
9380	55.245	0.346	No	No		18.658	0.294	0.294	18.658
9390	51.764	0.333	No	No		4.715	0.279	0.279	4.715
9400	72.438	0.3	No	No		25.202	0.308	0.308	25.202
9410	55.603	0.318	No	No		9.918	0.273	0.273	9.918
9420	53.229	0.357	No	No		36.114	0.309	No	No
9430	67.741	0.338	No	No		17.311	0.296	0.296	17.311
9440	66.95	0.281	No	No		49.293	0.294	No	No
9450	75.97	0.291	No	No		56.71	0.318	No	No
9460	63.082	0.324	No	No		48.506	0.314	No	No
9470	53.526	0.284	No	No		59.27	0.337	No	No
9480	72.77	0.312	No	No		64.015	0.296	No	No
9490	48.447	0.332	No	No		52.524	0.333	No	No
9500	77.876	0.304	No	No		58.69	0.336	No	No
9510	66.647	0.315	No	No		50.322	0.323	No	No
9520	67.475	0.284	No	No		50.643	0.344	No	No
9530	58.039	0.325	No	No		51.483	0.335	No	No
9540	63.295	0.3	No	No		42.469	0.277	No	No
9550	68.882	0.327	No	No		14.863	0.281	0.281	14.863
9560	52.177	0.309	No	No		69.208	0.309	No	No
9570	65.79	0.303	No	No		42.789	0.32	No	No
9580	80.01	0.299	No	No		58.13	0.314	No	No
9590	58.448	0.369	No	No		53.85	0.288	No	No
9600	54.394	0.319	No	No		65.478	0.305	No	No
9610	66.254	0.29	No	No		56.432	0.3	No	No
9620	56.764	0.317	No	No		55.351	0.312	No	No
9630	44.203	0.356	No	No		49.184	0.328	No	No
9640	69.613	0.294	No	No		18.348	0.302	0.302	18.348
9650	72.267	0.31	No	No		55.418	0.284	No	No
9660	61.293	0.313	No	No		63.705	0.3	No	No
9670	27.569	0.268	0.268	27.569		58.013	0.29	No	No
9680	42.175	0.314	No	No		60.051	0.305	No	No
9690	50.033	0.312	No	No		63.264	0.306	No	No
9700	52.536	0.307	No	No		63.714	0.32	No	No
9710	60.981	0.335	No	No		63.173	0.328	No	No
9720	55.369	0.31	No	No		55.481	0.302	No	No
9730	60.492	0.304	No	No		61.238	0.307	No	No
9740	64.527	0.282	No	No		64.293	0.32	No	No
9750	45.687	0.29	No	No		60.089	0.329	No	No
9760	54.376	0.288	No	No		54.012	0.345	No	No
9770	60.555	0.279	No	No		67.247	0.322	No	No
9780	10.271	0.283	0.283	10.271		64.88	0.313	No	No
9790	6.085	0.282	0.282	6.085		67.402	0.309	No	No
9800	59.901	0.271	No	No		44.908	0.295	No	No
9810	63.115	0.325	No	No		57.551	0.283	No	No
9820	37.246	0.326	No	No		45.309	0.302	No	No
9830	57.759	0.284	No	No		57.432	0.294	No	No
9840	57.862	0.305	No	No		47.251	0.314	No	No
9850	57.96	0.312	No	No		61.973	0.313	No	No
9860	68.009	0.32	No	No		55.938	0.295	No	No
9870	60.704	0.306	No	No		23.542	0.289	0.289	23.542
9880	69.19	0.323	No	No		23.404	0.308	0.308	23.404
9890	55.989	0.325	No	No		13.682	0.29	0.29	13.682
9900	58.04	0.3	No	No		18.639	0.29	0.29	18.639
9910	52.833	0.304	No	No		21.079	0.296	0.296	21.079
9920	64.209	0.291	No	No		23.981	0.284	0.284	23.981
9930	55.044	0.287	No	No		57.291	0.304	No	No
9940	63.32	0.301	No	No		13.007	0.267	0.267	13.007
9950	63.436	0.305	No	No		11.887	0.269	0.269	11.887
9960	49.169	0.328	No	No		60.367	0.299	No	No
9970	69.245	0.331	No	No		25.491	0.316	0.316	25.491
9980	59.206	0.331	No	No		6.47	0.305	0.305	6.47
9990	50.254	0.297	No	No		3.832	0.266	0.266	3.832
10000	58.745	0.293	No	No		10.354	0.289	0.289	10.354
10010	59.363	0.33	No	No		15.896	0.278	0.278	15.896
10020	53.416	0.298	No	No		5.793	0.312	0.312	5.793
10030	54.203	0.307	No	No		10.659	0.3	0.3	10.659
10040	59.096	0.287	No	No		31.337	0.297	No	No
10050	80.179	0.324	No	No		9.589	0.288	0.288	9.589
10060	60.665	0.289	No	No		54.645	0.287	No	No
10070	62.886	0.292	No	No		28.174	0.325	0.325	28.174
10080	71.361	0.319	No	No		17.293	0.29	0.29	17.293
10090	49.078	0.306	No	No		10.831	0.323	0.323	10.831
10100	61.678	0.286	No	No		11.867	0.296	0.296	11.867
10110	61.234	0.314	No	No		54.387	0.329	No	No
10120	65.63	0.302	No	No		58.578	0.307	No	No
10130	46.93	0.321	No	No		49.758	0.305	No	No
10140	62.352	0.292	No	No		39.197	0.321	No	No
10150	62.859	0.322	No	No		48.797	0.287	No	No
10160	56.65	0.295	No	No		56.438	0.329	No	No
10170	61.069	0.289	No	No		61.193	0.326	No	No
10180	57.142	0.309	No	No		60.638	0.313	No	No
10190	54.292	0.334	No	No		55.581	0.312	No	No
10200	61.071	0.326	No	No		40.341	0.288	No	No
10210	56.553	0.304	No	No		77.599	0.31	No	No
10220	50.32	0.286	No	No		63.119	0.306	No	No
10230	65.548	0.298	No	No		61.733	0.321	No	No
10240	66.724	0.315	No	No		59.715	0.312	No	No
10250	70.941	0.304	No	No		54.877	0.335	No	No
10260	50.548	0.319	No	No		49.553	0.34	No	No
10270	67.502	0.315	No	No		45.987	0.299	No	No
10280	59.925	0.294	No	No		62.242	0.309	No	No
10290	62.711	0.292	No	No		66.426	0.291	No	No
10300	63.431	0.295	No	No		47.138	0.333	No	No
10310	45.228	0.33	No	No		62.487	0.343	No	No
10320	63.729	0.305	No	No		8.07	0.297	0.297	8.07
10330	71.336	0.306	No	No		16.323	0.297	0.297	16.323
10340	75.508	0.307	No	No		53.363	0.304	No	No
10350	65.268	0.327	No	No		68.237	0.332	No	No
10360	62.925	0.306	No	No		73.702	0.33	No	No
10370	72.58	0.302	No	No		66.099	0.342	No	No
10380	64.388	0.328	No	No		53.319	0.299	No	No
10390	54.643	0.306	No	No		48.943	0.286	No	No
10400	63.483	0.327	No	No		71.526	0.294	No	No
10410	49.42	0.307	No	No		53.494	0.301	No	No
10420	70.646	0.329	No	No		67.001	0.342	No	No
10430	50.929	0.319	No	No		11.577	0.276	0.276	11.577
10440	69.361	0.325	No	No		69.828	0.315	No	No
10450	55.991	0.309	No	No		57.113	0.315	No	No
10460	61.299	0.317	No	No		53.664	0.345	No	No
10470	55.896	0.31	No	No		48.102	0.341	No	No
10480	62.958	0.315	No	No		59.292	0.339	No	No
10490	58.008	0.313	No	No		55.743	0.31	No	No
10500	55.909	0.295	No	No		52.249	0.309	No	No
10510	58.088	0.325	No	No		49.484	0.323	No	No
10520	63.381	0.31	No	No		51.515	0.373	No	No
10530	58.973	0.299	No	No		5.249	0.303	0.303	5.249
10540	47.53	0.303	No	No		68.233	0.3	No	No
10550	78.165	0.328	No	No		45.153	0.323	No	No
10560	35.651	0.348	No	No		58.241	0.321	No	No
10570	56.909	0.316	No	No		55.91	0.336	No	No
10580	57.005	0.307	No	No		42.397	0.321	No	No
10590	68.643	0.322	No	No		8.3	0.26	0.26	8.3
10600	47.281	0.297	No	No		59.023	0.318	No	No
10610	73.729	0.336	No	No		64.673	0.295	No	No
10620	39.58	0.318	No	No		55.404	0.323	No	No
10630	53.689	0.315	No	No		57.858	0.292	No	No
10640	55.73	0.313	No	No		48.302	0.316	No	No
10650	65.335	0.349	No	No		58.743	0.31	No	No
10660	52.02	0.323	No	No		63.283	0.326	No	No
10670	63.088	0.321	No	No		57.96	0.307	No	No
10680	73.484	0.309	No	No		42.579	0.359	No	No
10690	53.804	0.332	No	No		45.775	0.339	No	No
10700	56.536	0.309	No	No		61.218	0.314	No	No
10710	61.14	0.315	No	No		66.007	0.304	No	No
10720	55.005	0.305	No	No		45.797	0.348	No	No
10730	63.652	0.289	No	No		46.079	0.33	No	No
10740	62.816	0.282	No	No		69.208	0.279	No	No
10750	71.617	0.303	No	No		56.885	0.3	No	No
10760	64.504	0.313	No	No		70.426	0.294	No	No
10770	58.567	0.274	No	No		64.862	0.315	No	No
10780	56.195	0.312	No	No		63.266	0.308	No	No
10790	70.543	0.32	No	No		63.906	0.329	No	No
10800	67.101	0.291	No	No		47.443	0.31	No	No
10810	62.204	0.311	No	No		59.228	0.301	No	No
10820	51.367	0.329	No	No		56.697	0.335	No	No
10830	55.924	0.333	No	No		42.609	0.288	No	No
10840	81.155	0.323	No	No		55.491	0.324	No	No
10850	55.635	0.31	No	No		56.476	0.273	No	No
10860	60.564	0.299	No	No		68.081	0.319	No	No
10870	58.766	0.314	No	No		55.711	0.307	No	No
10880	50.949	0.32	No	No		54.94	0.331	No	No
10890	66.509	0.32	No	No		60.986	0.35	No	No
10900	56.997	0.315	No	No		64.937	0.324	No	No
10910	65.71	0.309	No	No		63.905	0.326	No	No
10920	58.685	0.385	No	No		64.335	0.327	No	No
10930	70.545	0.305	No	No		63.829	0.309	No	No
10940	56.475	0.332	No	No		67.38	0.281	No	No
10950	33.681	0.3	No	No		67.201	0.311	No	No
10960	71.411	0.326	No	No		74.199	0.342	No	No
10970	46.413	0.313	No	No		57.805	0.319	No	No
10980	65.043	0.289	No	No		47.915	0.298	No	No
10990	57.771	0.355	No	No		57.158	0.336	No	No
11000	76.75	0.348	No	No		60.574	0.336	No	No
11010	72.188	0.3	No	No		44.343	0.282	No	No
11020	57.167	0.293	No	No		59.763	0.394	No	No
11030	71.608	0.315	No	No		55.602	0.306	No	No
11040	63.992	0.3	No	No		54.136	0.317	No	No
11050	52.5	0.311	No	No		51.305	0.317	No	No
11060	63.293	0.293	No	No		53.282	0.307	No	No
11070	57.844	0.289	No	No		50.991	0.33	No	No
11080	60.839	0.296	No	No		51.051	0.297	No	No
11090	66.328	0.3	No	No		63.962	0.321	No	No
11100	66.894	0.294	No	No		67.506	0.301	No	No
11110	55.424	0.3	No	No		62.597	0.329	No	No
11120	49.85	0.283	No	No		65.947	0.298	No	No
11130	67.279	0.32	No	No		56.378	0.28	No	No
11140	63.764	0.284	No	No		55.285	0.307	No	No
11150	62.981	0.343	No	No		53.783	0.325	No	No
11160	68.1	0.326	No	No		46.994	0.287	No	No
11170	66.2	0.287	No	No		72.137	0.309	No	No
11180	67.5	0.319	No	No		58.821	0.322	No	No
11190	56.16	0.312	No	No		57.902	0.273	No	No
11200	46.429	0.288	No	No		49.91	0.31	No	No
11210	67.177	0.284	No	No		72.827	0.314	No	No
11220	70.541	0.285	No	No		59.229	0.322	No	No
11230	71.718	0.326	No	No		52.384	0.306	No	No
11240	67.792	0.327	No	No		45.84	0.302	No	No
11250	57.912	0.301	No	No		48.595	0.351	No	No
11260	52.012	0.338	No	No		49.686	0.329	No	No
11270	50.766	0.334	No	No		50.967	0.289	No	No
11280	61.481	0.291	No	No		54.112	0.309	No	No
11290	61.379	0.288	No	No		69.249	0.318	No	No
11300	45.886	0.346	No	No		61.27	0.319	No	No
11310	63.819	0.31	No	No		45.879	0.37	No	No
11320	48.952	0.293	No	No		56.318	0.335	No	No
11330	63.419	0.302	No	No		59.639	0.32	No	No
11340	39.14	0.314	No	No		48.145	0.329	No	No
11350	55.188	0.296	No	No		49.664	0.321	No	No
11360	44.344	0.281	No	No		50.375	0.299	No	No
11370	55.69	0.281	No	No		54.835	0.308	No	No
11380	59.441	0.317	No	No		12.887	0.281	0.281	12.887
11390	52.66	0.301	No	No		53.899	0.337	No	No
11400	58.653	0.301	No	No		48.28	0.322	No	No
11410	76.55	0.315	No	No		54.718	0.315	No	No
11420	53.248	0.337	No	No		56.528	0.323	No	No
11430	69.258	0.308	No	No		49.657	0.313	No	No
11440	66.4	0.295	No	No		69.917	0.315	No	No
11450	24.824	0.276	0.276	24.824		55.251	0.315	No	No
11460	55.159	0.303	No	No		62.078	0.325	No	No
11470	64.855	0.306	No	No		60.235	0.317	No	No
11480	75.452	0.3	No	No		51.985	0.31	No	No
11490	59.089	0.272	No	No		54.876	0.302	No	No
11500	54.523	0.286	No	No		60.107	0.315	No	No
11510	63.875	0.31	No	No		59.153	0.351	No	No
11520	58.838	0.313	No	No		53.781	0.348	No	No
11530	56.322	0.321	No	No		58.851	0.349	No	No
11540	58.653	0.309	No	No		26.287	0.312	0.312	26.287
11550	55.454	0.349	No	No		59.474	0.289	No	No
11560	55.85	0.36	No	No		70.478	0.384	No	No
11570	42.795	0.306	No	No		58.546	0.363	No	No
11580	64.336	0.349	No	No		66.986	0.342	No	No
11590	58.316	0.334	No	No		66.749	0.354	No	No
11600	63.198	0.299	No	No		61.121	0.289	No	No
11610	61.08	0.32	No	No		59.992	0.343	No	No
11620	72.953	0.298	No	No		56.564	0.301	No	No
11630	67.494	0.327	No	No		53.625	0.314	No	No
11640	59.389	0.293	No	No		50.034	0.332	No	No
11650	57.965	0.339	No	No		51.368	0.341	No	No
11660	66.479	0.287	No	No		52.65	0.34	No	No
11670	54.875	0.308	No	No		48.027	0.328	No	No
11680	58.475	0.297	No	No		53.539	0.328	No	No
11690	42.102	0.305	No	No		55.258	0.328	No	No
11700	72.969	0.331	No	No		61.673	0.345	No	No
11710	20.287	0.321	0.321	20.287		61.935	0.324	No	No
11720	11.692	0.296	0.296	11.692		63.636	0.325	No	No
11730	21.701	0.285	0.285	21.701		56.404	0.342	No	No
11740	73.587	0.315	No	No		67.327	0.34	No	No
11750	68.239	0.314	No	No		57.712	0.326	No	No
11760	60.315	0.3	No	No		50.304	0.327	No	No
11770	60.632	0.305	No	No		58.717	0.294	No	No
11780	61.933	0.312	No	No		58.548	0.317	No	No
11790	63.67	0.305	No	No		57.903	0.311	No	No
11800	69.529	0.31	No	No		57.824	0.307	No	No
11810	55.147	0.295	No	No		55.025	0.322	No	No
11820	59.8	0.293	No	No		53.433	0.28	No	No
11830	59.784	0.285	No	No		53.418	0.36	No	No
11840	61.945	0.343	No	No		48.152	0.337	No	No
11850	72.587	0.367	No	No		59.289	0.286	No	No
11860	62.336	0.29	No	No		53.127	0.356	No	No
11870	67.946	0.297	No	No		52.794	0.297	No	No
11880	54.259	0.283	No	No		58.718	0.329	No	No
11890	52.522	0.34	No	No		36.958	0.372	No	No
11900	50.641	0.311	No	No		50.337	0.327	No	No
11910	64.097	0.306	No	No		6.86	0.276	0.276	6.86
11920	46.649	0.3	No	No		37.939	0.352	No	No
11930	51.279	0.327	No	No		61.363	0.332	No	No
11940	70.709	0.322	No	No		48.142	0.317	No	No
11950	43.111	0.327	No	No		55.118	0.327	No	No
11960	56.665	0.292	No	No		52.634	0.335	No	No
11970	59.044	0.305	No	No		45.882	0.37	No	No
11980	61.753	0.336	No	No		56.08	0.316	No	No
11990	67.736	0.314	No	No		57.792	0.328	No	No
12000	89.211	0.31	No	No		52.086	0.319	No	No
12010	66.525	0.334	No	No		58.895	0.342	No	No
12020	92.971	0.292	No	No		69.26	0.325	No	No
12030	66.686	0.33	No	No		55.486	0.322	No	No
12040	61.773	0.333	No	No		48.048	0.355	No	No
12050	52.087	0.306	No	No		57.631	0.307	No	No
12060	65.227	0.331	No	No		58.416	0.319	No	No
12070	61.541	0.315	No	No		60.491	0.322	No	No
12080	56.597	0.349	No	No		51.943	0.342	No	No
12090	62.75	0.291	No	No		55.998	0.306	No	No
12100	62.859	0.308	No	No		56.512	0.335	No	No
12110	52.126	0.319	No	No		52.893	0.312	No	No
12120	69.894	0.322	No	No		67.132	0.364	No	No
12130	71.176	0.326	No	No		56.934	0.353	No	No
12140	70.819	0.333	No	No		62.49	0.305	No	No
12150	74.287	0.297	No	No		60.82	0.315	No	No
12160	75.595	0.308	No	No		59.443	0.296	No	No
12170	61.523	0.304	No	No		58.145	0.325	No	No
12180	63.874	0.303	No	No		51.383	0.323	No	No
12190	70.176	0.329	No	No		53.06	0.326	No	No
12200	48.343	0.331	No	No		56.29	0.326	No	No
12210	59.325	0.273	No	No		49.978	0.287	No	No
12220	65.156	0.331	No	No		60.865	0.321	No	No
12230	68.204	0.298	No	No		74.608	0.311	No	No
12240	43.482	0.308	No	No		43.109	0.342	No	No
12250	63.661	0.361	No	No		16.425	0.294	0.294	16.425
12260	61.559	0.314	No	No		16.275	0.308	0.308	16.275
12270	69.947	0.323	No	No		8.148	0.275	0.275	8.148
12280	60.223	0.324	No	No		17.452	0.271	0.271	17.452
12290	67.146	0.286	No	No		26.648	0.298	0.298	26.648
12300	63.691	0.318	No	No		65.067	0.319	No	No
12310	52.292	0.349	No	No		68.51	0.317	No	No
12320	57.301	0.311	No	No		51.106	0.304	No	No
12330	39.908	0.351	No	No		56.455	0.333	No	No
12340	67.71	0.322	No	No		61.981	0.328	No	No
12350	47.736	0.32	No	No		53.811	0.31	No	No
12360	69.384	0.323	No	No		49.992	0.297	No	No
12370	41.321	0.288	No	No		48.117	0.358	No	No
12380	64.73	0.319	No	No		50.431	0.359	No	No
12390	58.415	0.341	No	No		45.416	0.309	No	No
12400	39.664	0.337	No	No		50.002	0.307	No	No
12410	70.163	0.324	No	No		48.979	0.287	No	No
12420	62.946	0.33	No	No		60.878	0.323	No	No
12430	57.072	0.285	No	No		50.456	0.3	No	No
12440	57.587	0.301	No	No		59.179	0.302	No	No
12450	51.461	0.323	No	No		59.726	0.314	No	No
12460	54.234	0.334	No	No		47.069	0.304	No	No
12470	56.632	0.349	No	No		44.592	0.277	No	No
12480	54.188	0.331	No	No		44.759	0.34	No	No
12490	54.841	0.294	No	No		56.26	0.312	No	No
12500	60.307	0.348	No	No		51.794	0.299	No	No
12510	61.098	0.299	No	No		58.283	0.328	No	No
12520	67.44	0.305	No	No		41.195	0.3	No	No
12530	61.053	0.295	No	No		50.879	0.281	No	No
12540	72.512	0.322	No	No		53.951	0.313	No	No
12550	42.639	0.317	No	No		60.654	0.284	No	No
12560	57.824	0.282	No	No		46.695	0.358	No	No
12570	66.303	0.273	No	No		32.566	0.326	No	No
12580	57.433	0.336	No	No		50.881	0.275	No	No
12590	55.14	0.339	No	No		52.736	0.332	No	No
12600	36.21	0.3	No	No		36.922	0.293	No	No
12610	62.434	0.295	No	No		26.019	0.302	0.302	26.019
12620	55.869	0.295	No	No		3.963	0.266	0.266	3.963
12630	66.179	0.318	No	No		62.235	0.291	No	No
12640	71.026	0.305	No	No		14.985	0.299	0.299	14.985
12650	56.966	0.317	No	No		14.432	0.328	0.328	14.432
12660	60.146	0.342	No	No		6.976	0.28	0.28	6.976
12670	67.675	0.302	No	No		60.137	0.325	No	No
12680	55.449	0.358	No	No		54.988	0.336	No	No
12690	56.119	0.324	No	No		47.742	0.322	No	No
12700	59.348	0.3	No	No		23.682	0.297	0.297	23.682
12710	55.142	0.34	No	No		19.095	0.285	0.285	19.095
12720	63.321	0.33	No	No		52.822	0.312	No	No
12730	67.634	0.308	No	No		54.587	0.311	No	No
12740	53.735	0.288	No	No		49.154	0.286	No	No
12750	55.107	0.329	No	No		49.246	0.311	No	No
12760	58.641	0.344	No	No		54.342	0.299	No	No
12770	62.344	0.298	No	No		44.132	0.331	No	No
12780	54.777	0.288	No	No		48.252	0.317	No	No
12790	48.256	0.317	No	No		62.162	0.311	No	No
12800	50.998	0.318	No	No		50.143	0.32	No	No
12810	67.088	0.3	No	No		63.069	0.308	No	No
12820	57.375	0.3	No	No		64.158	0.311	No	No
12830	65.94	0.374	No	No		58.038	0.294	No	No
12840	56.701	0.315	No	No		58.343	0.301	No	No
12850	58.422	0.306	No	No		53.755	0.33	No	No
12860	55.495	0.305	No	No		42.591	0.352	No	No
12870	62.42	0.33	No	No		62.33	0.316	No	No
12880	43.026	0.345	No	No		38.623	0.346	No	No
12890	51.521	0.29	No	No		46.521	0.347	No	No
12900	66.219	0.32	No	No		45.773	0.291	No	No
12910	63.963	0.34	No	No		56.301	0.309	No	No
12920	58.479	0.305	No	No		45.586	0.312	No	No
12930	61.795	0.299	No	No		48.48	0.318	No	No
12940	69.422	0.31	No	No		45.486	0.318	No	No
12950	71.238	0.336	No	No		61.399	0.288	No	No
12960	58.286	0.297	No	No		37.826	0.306	No	No
12970	58.631	0.29	No	No		54.847	0.289	No	No
12980	52.586	0.324	No	No		49.436	0.339	No	No
12990	56.663	0.344	No	No		35.312	0.339	No	No
13000	63.132	0.351	No	No		36.807	0.322	No	No
13010	55.389	0.311	No	No		57.381	0.309	No	No
13020	69.386	0.284	No	No		63.013	0.324	No	No
13030	58.369	0.312	No	No		55.071	0.315	No	No
13040	47.294	0.308	No	No		45.385	0.326	No	No
13050	52.372	0.287	No	No		54.477	0.377	No	No
13060	76.217	0.331	No	No		66.345	0.369	No	No
13070	40.213	0.31	No	No		58.974	0.303	No	No
13080	58.01	0.304	No	No		28.567	0.298	0.298	28.567
13090	65.916	0.3	No	No		54.038	0.321	No	No
13100	62.986	0.319	No	No		62.822	0.316	No	No
13110	56.118	0.293	No	No		54.012	0.327	No	No
13120	68.981	0.351	No	No		51.86	0.324	No	No
13130	64.015	0.336	No	No		9.335	0.298	0.298	9.335
13140	65.055	0.328	No	No		6.743	0.284	0.284	6.743
13150	62.07	0.378	No	No		7.688	0.266	0.266	7.688
13160	51.47	0.352	No	No		73.331	0.297	No	No
13170	56.273	0.315	No	No		54.413	0.314	No	No
13180	54.971	0.321	No	No		62.617	0.312	No	No
13190	62.413	0.335	No	No		5.593	0.294	0.294	5.593
13200	60.893	0.319	No	No		6.219	0.3	0.3	6.219
13210	59.588	0.332	No	No		19.732	0.313	0.313	19.732
13220	44.345	0.324	No	No		16.236	0.295	0.295	16.236
13230	54.485	0.315	No	No		26.267	0.307	0.307	26.267
13240	48.18	0.326	No	No		26.221	0.324	0.324	26.221
13250	54.894	0.354	No	No		9.606	0.283	0.283	9.606
13260	60.637	0.29	No	No		12.342	0.3	0.3	12.342
13270	85.774	0.29	No	No		42.925	0.305	No	No
13280	70.871	0.33	No	No		6.85	0.301	0.301	6.85
13290	66.799	0.306	No	No		23.073	0.277	0.277	23.073
13300	89.554	0.305	No	No		16.106	0.289	0.289	16.106
13310	53.261	0.291	No	No		10.982	0.302	0.302	10.982
13320	55.123	0.275	No	No		8.259	0.312	0.312	8.259
13330	40.772	0.297	No	No		9.299	0.326	0.326	9.299
13340	72.041	0.299	No	No		3.6	0.306	0.306	3.6
13350	63.177	0.291	No	No		9.509	0.318	0.318	9.509
13360	54.003	0.318	No	No		11.129	0.321	0.321	11.129
13370	71.986	0.307	No	No		15.185	0.294	0.294	15.185
13380	69.626	0.328	No	No		10.924	0.301	0.301	10.924
13390	64.301	0.311	No	No		58.651	0.293	No	No
13400	68.252	0.299	No	No		44.183	0.287	No	No
13410	39.151	0.326	No	No		61.91	0.314	No	No
13420	51.912	0.307	No	No		55.348	0.305	No	No
13430	59.668	0.294	No	No		57.226	0.326	No	No
13440	60.086	0.319	No	No		48.778	0.324	No	No
13450	58.485	0.326	No	No		69.774	0.291	No	No
13460	54.702	0.3	No	No		49.914	0.327	No	No
13470	70.314	0.29	No	No		59.212	0.308	No	No
13480	57.595	0.287	No	No		54.203	0.326	No	No
13490	62.791	0.312	No	No		5.944	0.263	0.263	5.944
13500	58.063	0.293	No	No		12.79	0.289	0.289	12.79
13510	78.852	0.35	No	No		68.42	0.31	No	No
13520	66.599	0.296	No	No		52.8	0.318	No	No
13530	68.966	0.302	No	No		61.577	0.292	No	No
13540	69.617	0.314	No	No		53.597	0.307	No	No
13550	64.759	0.327	No	No		61.962	0.305	No	No
13560	66.485	0.305	No	No		53.773	0.326	No	No
13570	44.517	0.309	No	No		41.596	0.323	No	No
13580	70.469	0.297	No	No		56.011	0.285	No	No
13590	58.416	0.316	No	No		47.166	0.328	No	No
13600	53.954	0.326	No	No		69.384	0.291	No	No
13610	58.964	0.294	No	No		64.594	0.292	No	No
13620	45.384	0.319	No	No		53.865	0.306	No	No
13630	56.557	0.305	No	No		53.943	0.297	No	No
13640	60.059	0.321	No	No		56.673	0.3	No	No
13650	52.824	0.356	No	No		54.858	0.317	No	No
13660	61.248	0.284	No	No		59.334	0.356	No	No
13670	54.249	0.351	No	No		58.191	0.313	No	No
13680	46.507	0.328	No	No		52.301	0.304	No	No
13690	55.155	0.307	No	No		58.244	0.309	No	No
13700	71.471	0.343	No	No		53.359	0.315	No	No
13710	55.587	0.321	No	No		54.054	0.339	No	No
13720	55.197	0.273	No	No		74.53	0.297	No	No
13730	62.217	0.3	No	No		46.304	0.278	No	No
13740	39.535	0.287	No	No		51.334	0.3	No	No
13750	49.37	0.304	No	No		63.968	0.325	No	No
13760	72.427	0.293	No	No		68.464	0.32	No	No
13770	59.854	0.29	No	No		53.67	0.304	No	No
13780	50.55	0.35	No	No		52.921	0.341	No	No
13790	52.864	0.307	No	No		58.416	0.346	No	No
13800	60.12	0.329	No	No		34.438	0.296	No	No
13810	73.281	0.296	No	No		71.464	0.313	No	No
13820	67.597	0.276	No	No		64.841	0.318	No	No
13830	80.738	0.278	No	No		48.102	0.304	No	No
13840	57.28	0.29	No	No		50.466	0.301	No	No
13850	41.24	0.308	No	No		56.894	0.297	No	No
13860	58.257	0.288	No	No		46.215	0.313	No	No
13870	46.251	0.294	No	No		41.828	0.308	No	No
13880	44.066	0.304	No	No		60.144	0.327	No	No
13890	66.737	0.277	No	No		47.737	0.29	No	No
13900	58.727	0.29	No	No		26.052	0.28	0.28	26.052
13910	56.299	0.305	No	No		10.741	0.271	0.271	10.741
13920	24.975	0.291	0.291	24.975		26.604	0.302	0.302	26.604
13930	67.893	0.281	No	No		12.751	0.3	0.3	12.751
13940	50.093	0.32	No	No		3.765	0.263	0.263	3.765
13950	55.848	0.286	No	No		9.558	0.304	0.304	9.558
13960	47.012	0.334	No	No		11.606	0.288	0.288	11.606
13970	45.912	0.295	No	No		43.479	0.272	No	No
13980	61.946	0.311	No	No		21.646	0.3	0.3	21.646
13990	39.018	0.334	No	No		4.693	0.281	0.281	4.693
14000	52.638	0.307	No	No		3.958	0.271	0.271	3.958
14010	51.118	0.28	No	No		16.956	0.274	0.274	16.956
14020	55.251	0.285	No	No		24.024	0.299	0.299	24.024
14030	63.937	0.32	No	No		23.329	0.303	0.303	23.329
14040	53.797	0.304	No	No		9.064	0.288	0.288	9.064
14050	62.723	0.297	No	No		20.424	0.28	0.28	20.424
14060	28.292	0.279	0.279	28.292		7.242	0.286	0.286	7.242
14070	70.915	0.284	No	No		5.895	0.295	0.295	5.895
14080	65.149	0.292	No	No		5.418	0.278	0.278	5.418
14090	87.414	0.393	No	No		18.017	0.288	0.288	18.017
14100	60.206	0.317	No	No		11.329	0.283	0.283	11.329
14110	53.587	0.326	No	No		5.478	0.269	0.269	5.478
14120	57.096	0.287	No	No		10.191	0.294	0.294	10.191
14130	52.387	0.322	No	No		15.834	0.265	0.265	15.834
14140	67.28	0.287	No	No		19.15	0.291	0.291	19.15
14150	66.576	0.329	No	No		8.756	0.27	0.27	8.756
14160	62.95	0.297	No	No		33.922	0.305	No	No
14170	47.254	0.3	No	No		17.027	0.272	0.272	17.027
14180	67.139	0.319	No	No		12.861	0.267	0.267	12.861
14190	54.512	0.312	No	No		14.863	0.274	0.274	14.863
14200	56.571	0.329	No	No		11.435	0.286	0.286	11.435
14210	62.013	0.303	No	No		6.342	0.282	0.282	6.342
14220	50.909	0.315	No	No		9.586	0.299	0.299	9.586
14230	57.528	0.306	No	No		11.55	0.289	0.289	11.55
14240	50.746	0.324	No	No		13.173	0.304	0.304	13.173
14250	60.142	0.329	No	No		4.011	0.29	0.29	4.011
14260	52.141	0.312	No	No		21.343	0.28	0.28	21.343
14270	64.679	0.292	No	No		10.033	0.257	0.257	10.033
14280	65.009	0.305	No	No		3.27	0.269	0.269	3.27
14290	67.793	0.287	No	No		12.566	0.274	0.274	12.566
14300	62.938	0.338	No	No		10.409	0.296	0.296	10.409
14310	60.394	0.294	No	No		14.257	0.268	0.268	14.257
14320	63.034	0.29	No	No		11.41	0.289	0.289	11.41
14330	63.941	0.3	No	No		26.729	0.317	0.317	26.729
14340	72.06	0.333	No	No		35.035	0.304	No	No
14350	63.19	0.298	No	No		44.441	0.308	No	No
14360	65.611	0.292	No	No		75.156	0.33	No	No
14370	61.095	0.319	No	No		71.631	0.337	No	No
14380	58.986	0.313	No	No		63.615	0.341	No	No
14390	50.376	0.299	No	No		44.229	0.302	No	No
14400	59.795	0.33	No	No		16.24	0.286	0.286	16.24
14410	55.477	0.306	No	No		64.639	0.326	No	No
14420	50.987	0.299	No	No		56.261	0.307	No	No
14430	42.818	0.281	No	No		65.494	0.314	No	No
14440	30.786	0.272	No	No		54.791	0.3	No	No
14450	50.995	0.312	No	No		50.479	0.305	No	No
14460	69.813	0.329	No	No		65.207	0.329	No	No
14470	57.847	0.32	No	No		48.201	0.325	No	No
14480	58.66	0.31	No	No		17.562	0.289	0.289	17.562
14490	63.465	0.31	No	No		50.581	0.32	No	No
14500	62.711	0.324	No	No		55.197	0.316	No	No
14510	51.766	0.345	No	No		62.352	0.323	No	No
14520	56.719	0.3	No	No		46.354	0.349	No	No
14530	54.162	0.321	No	No		51.287	0.313	No	No
14540	52.648	0.301	No	No		46.21	0.304	No	No
14550	60.122	0.333	No	No		60.676	0.307	No	No
14560	64.21	0.297	No	No		75.61	0.306	No	No
14570	63.467	0.323	No	No		54.949	0.338	No	No
14580	57.351	0.301	No	No		61.385	0.303	No	No
14590	65.376	0.303	No	No		55.114	0.312	No	No
14600	60.266	0.325	No	No		52.478	0.356	No	No
14610	75.607	0.355	No	No		38.683	0.322	No	No
14620	68.648	0.294	No	No		75.571	0.317	No	No
14630	68.619	0.335	No	No		48.231	0.311	No	No
14640	67.613	0.291	No	No		49.613	0.308	No	No
14650	74.402	0.334	No	No		66.134	0.301	No	No
14660	91.556	0.364	No	No		35.372	0.326	No	No
14670	46.557	0.332	No	No		53.796	0.313	No	No
14680	67.093	0.328	No	No		45.926	0.324	No	No
14690	60.257	0.307	No	No		53.199	0.323	No	No
14700	58.325	0.313	No	No		63.137	0.3	No	No
14710	60.982	0.299	No	No		66.311	0.33	No	No
14720	69.092	0.308	No	No		65.262	0.309	No	No
14730	69.47	0.327	No	No		55.451	0.307	No	No
14740	63.102	0.319	No	No		50.457	0.331	No	No
14750	56.312	0.314	No	No		49.38	0.302	No	No
14760	62.038	0.305	No	No		45.218	0.327	No	No
14770	53.125	0.318	No	No		45.424	0.33	No	No
14780	57.867	0.321	No	No		50.298	0.335	No	No
14790	60.109	0.284	No	No		49.288	0.307	No	No
14800	67.05	0.314	No	No		77.502	0.31	No	No
14810	61.641	0.275	No	No		46.701	0.317	No	No
14820	53.463	0.319	No	No		57.159	0.313	No	No
14830	56.852	0.311	No	No		33.273	0.3	No	No
14840	69.22	0.324	No	No		65.475	0.316	No	No
14850	54.343	0.306	No	No		60.576	0.314	No	No
14860	68.062	0.31	No	No		65.481	0.325	No	No
14870	68.259	0.302	No	No		48.664	0.326	No	No
14880	77.929	0.3	No	No		63.261	0.327	No	No
14890	65.176	0.292	No	No		59.01	0.312	No	No
14900	62.404	0.302	No	No		12.989	0.292	0.292	12.989
14910	61.473	0.304	No	No		19.094	0.3	0.3	19.094
14920	57.949	0.339	No	No		18.222	0.284	0.284	18.222
14930	78.395	0.338	No	No		61.937	0.367	No	No
14940	67.195	0.329	No	No		54.382	0.322	No	No
14950	54.459	0.313	No	No		61.221	0.331	No	No
14960	63.184	0.279	No	No		59.129	0.33	No	No
14970	67.892	0.335	No	No		44.667	0.359	No	No
14980	59.73	0.336	No	No		53.049	0.332	No	No
14990	65.55	0.304	No	No		69.37	0.326	No	No
15000	67.144	0.302	No	No		40.677	0.301	No	No
15010	86.411	0.321	No	No		50.04	0.332	No	No
15020	47.975	0.324	No	No		53.394	0.357	No	No
15030	60.053	0.305	No	No		55.91	0.333	No	No
15040	72.118	0.33	No	No		52.503	0.387	No	No
15050	60.686	0.393	No	No		47.732	0.315	No	No
15060	64.558	0.349	No	No		51.083	0.352	No	No
15070	63.564	0.333	No	No		55.847	0.353	No	No
15080	58.368	0.304	No	No		50.131	0.341	No	No
15090	42.659	0.318	No	No		69.944	0.353	No	No
15100	65.81	0.324	No	No		77.814	0.336	No	No
15110	64.091	0.297	No	No		53.859	0.318	No	No
15120	60.671	0.331	No	No		59.558	0.317	No	No
15130	61.233	0.303	No	No		63.266	0.325	No	No
15140	67.142	0.324	No	No		56.748	0.312	No	No
15150	67.357	0.31	No	No		64.864	0.35	No	No
15160	61.307	0.333	No	No		60.012	0.315	No	No
15170	59.216	0.307	No	No		64.386	0.319	No	No
15180	62.156	0.339	No	No		55.772	0.31	No	No
15190	65.52	0.303	No	No		58.412	0.282	No	No
15200	58.35	0.306	No	No		46.912	0.31	No	No
15210	73.549	0.349	No	No		50.846	0.308	No	No
15220	48.367	0.326	No	No		58.189	0.32	No	No
15230	64.602	0.318	No	No		55.599	0.315	No	No
15240	55.328	0.343	No	No		56.09	0.297	No	No
15250	47.779	0.316	No	No		65.997	0.308	No	No
15260	69.349	0.358	No	No		52.24	0.319	No	No
15270	70.162	0.312	No	No		61.313	0.31	No	No
15280	71.449	0.345	No	No		59.256	0.292	No	No
15290	58.37	0.301	No	No		73.826	0.315	No	No
15300	66.804	0.306	No	No		60.584	0.325	No	No
15310	62.081	0.282	No	No		60.71	0.286	No	No
15320	57.579	0.319	No	No		63.129	0.306	No	No
15330	58.557	0.332	No	No		56.594	0.336	No	No
15340	65.91	0.313	No	No		48.543	0.327	No	No
15350	65.173	0.292	No	No		59.989	0.341	No	No
15360	59.928	0.288	No	No		62.053	0.314	No	No
15370	76.635	0.305	No	No		59.386	0.357	No	No
15380	72.449	0.294	No	No		64.267	0.329	No	No
15390	45.062	0.328	No	No		49.454	0.271	No	No
15400	51.557	0.333	No	No		62.749	0.325	No	No
15410	47.642	0.303	No	No		60.572	0.336	No	No
15420	63.885	0.302	No	No		43.628	0.298	No	No
15430	56.467	0.306	No	No		66.789	0.305	No	No
15440	75.014	0.348	No	No		53.901	0.281	No	No
15450	53.741	0.34	No	No		51.756	0.299	No	No
15460	65.137	0.342	No	No		51.859	0.287	No	No
15470	65.355	0.373	No	No		55.337	0.296	No	No
15480	61.631	0.34	No	No		58.556	0.341	No	No
15490	58.193	0.312	No	No		60.306	0.319	No	No
15500	72.689	0.327	No	No		48.639	0.314	No	No
15510	60.584	0.327	No	No		60.394	0.309	No	No
15520	52.146	0.357	No	No		62.178	0.309	No	No
15530	65.681	0.324	No	No		66.004	0.324	No	No
15540	53.669	0.321	No	No		59.29	0.3	No	No
15550	74.307	0.324	No	No		49.105	0.311	No	No
15560	64.18	0.315	No	No		69.08	0.306	No	No
15570	47.655	0.29	No	No		60.772	0.321	No	No
15580	63.644	0.312	No	No		53.084	0.296	No	No
15590	73.292	0.331	No	No		13.115	0.266	0.266	13.115
15600	72.91	0.326	No	No		6.88	0.263	0.263	6.88
15610	72.927	0.33	No	No		73.783	0.309	No	No
15620	60.296	0.301	No	No		63.828	0.29	No	No
15630	62.934	0.3	No	No		24.614	0.291	0.291	24.614
15640	67.789	0.297	No	No		9.664	0.279	0.279	9.664
15650	56.503	0.276	No	No		18.688	0.33	0.33	18.688
15660	74.284	0.322	No	No		8.564	0.289	0.289	8.564
15670	62.885	0.314	No	No		7.599	0.27	0.27	7.599
15680	45.289	0.306	No	No		6.221	0.271	0.271	6.221
15690	79.002	0.338	No	No		6.346	0.265	0.265	6.346
15700	68.559	0.315	No	No		8.845	0.323	0.323	8.845
15710	72.954	0.29	No	No		16.152	0.303	0.303	16.152
15720	63.878	0.303	No	No		10.843	0.295	0.295	10.843
15730	66.343	0.294	No	No		37.503	0.31	No	No
15740	58.15	0.323	No	No		5.343	0.279	0.279	5.343
15750	62.778	0.322	No	No		21.76	0.275	0.275	21.76
15760	51.878	0.302	No	No		25.599	0.281	0.281	25.599
15770	62.584	0.297	No	No		16.307	0.322	0.322	16.307
15780	63.249	0.278	No	No		24.704	0.281	0.281	24.704
15790	67.82	0.349	No	No		8.611	0.287	0.287	8.611
15800	57.28	0.3	No	No		10.105	0.282	0.282	10.105
15810	59.476	0.271	No	No		3.641	0.313	0.313	3.641
15820	63.207	0.315	No	No		4.231	0.264	0.264	4.231
15830	70.689	0.321	No	No		8.881	0.279	0.279	8.881
15840	62.194	0.281	No	No		20.129	0.305	0.305	20.129
15850	73.755	0.307	No	No		11.601	0.284	0.284	11.601
15860	63.462	0.305	No	No		24.052	0.284	0.284	24.052
15870	72.931	0.333	No	No		14.353	0.317	0.317	14.353
15880	59.121	0.374	No	No		3.433	0.286	0.286	3.433
15890	65.013	0.322	No	No		1.871	0.277	0.277	1.871
15900	55.581	0.348	No	No		19.017	0.296	0.296	19.017
15910	66.18	0.311	No	No		3.461	0.256	0.256	3.461
15920	66.502	0.329	No	No		3.266	0.267	0.267	3.266
15930	63.608	0.274	No	No		8.814	0.27	0.27	8.814
15940	73.508	0.318	No	No		10.481	0.27	0.27	10.481
15950	70.322	0.347	No	No		19.783	0.306	0.306	19.783
15960	57.987	0.32	No	No		4.087	0.277	0.277	4.087
15970	61.027	0.315	No	No		8.379	0.315	0.315	8.379
15980	67.267	0.287	No	No		13.892	0.3	0.3	13.892
15990	65.763	0.376	No	No		19.102	0.298	0.298	19.102
16000	64.312	0.292	No	No		12.984	0.29	0.29	12.984
16010	56.532	0.337	No	No		21.46	0.285	0.285	21.46
16020	49.001	0.363	No	No		25.999	0.296	0.296	25.999
16030	63.58	0.301	No	No		6.824	0.321	0.321	6.824
16040	54.884	0.315	No	No		9.72	0.298	0.298	9.72
16050	69.257	0.287	No	No		15.075	0.32	0.32	15.075
16060	57.81	0.292	No	No		20.435	0.32	0.32	20.435
16070	65.159	0.307	No	No		13.812	0.296	0.296	13.812
16080	68.928	0.344	No	No		27.02	0.3	0.3	27.02
16090	55.937	0.351	No	No		15.948	0.275	0.275	15.948
16100	55.535	0.306	No	No		12.676	0.304	0.304	12.676
16110	62.215	0.283	No	No		15.165	0.271	0.271	15.165
16120	64.21	0.329	No	No		19.36	0.276	0.276	19.36
16130	47.664	0.302	No	No		19.411	0.299	0.299	19.411
16140	54.662	0.292	No	No		10.818	0.27	0.27	10.818
16150	61.991	0.308	No	No		9.718	0.304	0.304	9.718
16160	57.766	0.308	No	No		15.292	0.29	0.29	15.292
16170	45.796	0.318	No	No		20.892	0.292	0.292	20.892
16180	51.496	0.282	No	No		2.92	0.27	0.27	2.92
16190	18.076	0.285	0.285	18.076		3.734	0.302	0.302	3.734
16200	16.095	0.267	0.267	16.095		11.733	0.282	0.282	11.733
16210	13.88	0.305	0.305	13.88		13.927	0.294	0.294	13.927
16220	9.558	0.276	0.276	9.558		11.05	0.266	0.266	11.05
16230	65.103	0.279	No	No		5.916	0.261	0.261	5.916
16240	72.454	0.351	No	No		16.636	0.275	0.275	16.636
16250	59.158	0.336	No	No		16.926	0.285	0.285	16.926
16260	58.194	0.304	No	No		6.631	0.29	0.29	6.631
16270	64.628	0.312	No	No		2.691	0.288	0.288	2.691
16280	61.29	0.287	No	No		11.716	0.286	0.286	11.716
16290	76.47	0.285	No	No		0.459	0.288	0.288	0.459
16300	61.091	0.317	No	No		2.786	0.291	0.291	2.786
16310	53.875	0.304	No	No		25.826	0.295	0.295	25.826
16320	49.808	0.312	No	No		19.621	0.28	0.28	19.621
16330	63.269	0.322	No	No		12.985	0.289	0.289	12.985
16340	61.86	0.301	No	No		15.12	0.287	0.287	15.12
16350	64.902	0.285	No	No		7.863	0.274	0.274	7.863
16360	60.3	0.323	No	No		15.311	0.284	0.284	15.311
16370	69.07	0.303	No	No		12.007	0.275	0.275	12.007
16380	55.894	0.322	No	No		21.485	0.282	0.282	21.485
16390	53.052	0.316	No	No		14.378	0.265	0.265	14.378
16400	48.713	0.328	No	No		20.178	0.272	0.272	20.178
16410	50.255	0.297	No	No		20.739	0.28	0.28	20.739
16420	62.125	0.325	No	No		15.001	0.282	0.282	15.001
16430	77.022	0.283	No	No		11.901	0.27	0.27	11.901
16440	62.93	0.313	No	No		9.32	0.268	0.268	9.32
16450	72.876	0.334	No	No		7.259	0.278	0.278	7.259
16460	71.199	0.329	No	No		18.579	0.284	0.284	18.579
16470	57.426	0.318	No	No		15.244	0.287	0.287	15.244
16480	52.803	0.3	No	No		10.783	0.268	0.268	10.783
16490	65.201	0.327	No	No		11.303	0.279	0.279	11.303
16500	65.962	0.316	No	No		15.856	0.272	0.272	15.856
16510	68.616	0.297	No	No		19.509	0.312	0.312	19.509
16520	52.334	0.295	No	No		1.891	0.274	0.274	1.891
16530	53.299	0.327	No	No		18.509	0.275	0.275	18.509
16540	57.892	0.33	No	No		19.368	0.292	0.292	19.368
16550	50.012	0.32	No	No		3.434	0.279	0.279	3.434
16560	65.752	0.295	No	No		15.373	0.27	0.27	15.373
16570	53.458	0.288	No	No		14.568	0.302	0.302	14.568
16580	66.765	0.305	No	No		19.664	0.281	0.281	19.664
16590	50.256	0.309	No	No		32.907	0.307	No	No
16600	65.274	0.3	No	No		26.477	0.33	0.33	26.477
16610	61.363	0.274	No	No		14.605	0.276	0.276	14.605
16620	59.088	0.287	No	No		14.274	0.3	0.3	14.274
16630	65.392	0.279	No	No		9.531	0.291	0.291	9.531
16640	58.918	0.323	No	No		8.918	0.274	0.274	8.918
16650	42.148	0.29	No	No		1.719	0.297	0.297	1.719
16660	58.76	0.331	No	No		6.699	0.265	0.265	6.699
16670	51.327	0.278	No	No		5.517	0.286	0.286	5.517
16680	53.948	0.297	No	No		11.745	0.307	0.307	11.745
16690	53.995	0.312	No	No		16.733	0.335	0.335	16.733
16700	59.793	0.324	No	No		11.106	0.279	0.279	11.106
16710	41.51	0.332	No	No		19.337	0.288	0.288	19.337
16720	64.619	0.313	No	No		9.559	0.317	0.317	9.559
16730	63.849	0.282	No	No		3.454	0.278	0.278	3.454
16740	36.027	0.302	No	No		15.345	0.303	0.303	15.345
16750	57.738	0.311	No	No		9.339	0.3	0.3	9.339
16760	51.154	0.301	No	No		1.968	0.292	0.292	1.968
16770	58.125	0.326	No	No		5.271	0.281	0.281	5.271
16780	58.348	0.297	No	No		26.434	0.287	0.287	26.434
16790	62.106	0.312	No	No		8.401	0.273	0.273	8.401
16800	70.688	0.33	No	No		9.437	0.28	0.28	9.437
16810	59.735	0.345	No	No		16.932	0.284	0.284	16.932
16820	46.4	0.347	No	No		4.832	0.272	0.272	4.832
16830	52.743	0.298	No	No		18.436	0.281	0.281	18.436
16840	62.282	0.311	No	No		4.947	0.295	0.295	4.947
16850	58.412	0.321	No	No		18.891	0.28	0.28	18.891
16860	58.301	0.345	No	No		13.145	0.286	0.286	13.145
16870	57.502	0.319	No	No		8.788	0.285	0.285	8.788
16880	56.301	0.302	No	No		35.482	0.305	No	No
16890	60.006	0.32	No	No		16.304	0.282	0.282	16.304
16900	49.555	0.334	No	No		24.012	0.306	0.306	24.012
16910	50.883	0.317	No	No		5.238	0.313	0.313	5.238
16920	57.158	0.305	No	No		8.988	0.284	0.284	8.988
16930	67.793	0.293	No	No		21.763	0.297	0.297	21.763
16940	59.169	0.318	No	No		19.93	0.279	0.279	19.93
16950	52.119	0.304	No	No		9.729	0.298	0.298	9.729
16960	67.658	0.289	No	No		11.795	0.309	0.309	11.795
16970	46.931	0.335	No	No		5.226	0.295	0.295	5.226
16980	66.118	0.3	No	No		24.456	0.285	0.285	24.456
16990	56.282	0.343	No	No		14.857	0.267	0.267	14.857
17000	49.699	0.332	No	No		23.925	0.283	0.283	23.925
17010	64.46	0.329	No	No		7.064	0.262	0.262	7.064
17020	57.514	0.319	No	No		8.963	0.278	0.278	8.963
17030	59.86	0.294	No	No		10.257	0.293	0.293	10.257
17040	60.908	0.324	No	No		15.598	0.309	0.309	15.598
17050	60.778	0.325	No	No		19.052	0.315	0.315	19.052
17060	67.056	0.307	No	No		23.522	0.292	0.292	23.522
17070	63.767	0.3	No	No		11.293	0.297	0.297	11.293
17080	52.863	0.31	No	No		25.586	0.285	0.285	25.586
17090	57	0.305	No	No		13.642	0.308	0.308	13.642
17100	46.897	0.334	No	No		12.898	0.277	0.277	12.898
17110	75.679	0.324	No	No		16.457	0.292	0.292	16.457
17120	62.942	0.336	No	No		8.996	0.272	0.272	8.996
17130	52.187	0.341	No	No		18.532	0.307	0.307	18.532
17140	63.059	0.322	No	No		10.798	0.277	0.277	10.798
17150	60.878	0.311	No	No		8.466	0.302	0.302	8.466
17160	70.849	0.332	No	No		16.882	0.296	0.296	16.882
17170	70.699	0.332	No	No		12.157	0.264	0.264	12.157
17180	71.147	0.325	No	No		9.848	0.278	0.278	9.848
17190	66.873	0.338	No	No		17.437	0.301	0.301	17.437
17200	67.556	0.311	No	No		14.367	0.276	0.276	14.367
17210	53.11	0.292	No	No		7.65	0.289	0.289	7.65
17220	78.787	0.332	No	No		15.285	0.273	0.273	15.285
17230	49.419	0.301	No	No		6.083	0.278	0.278	6.083
17240	57.456	0.286	No	No		14.449	0.276	0.276	14.449
17250	66.019	0.288	No	No		5.048	0.273	0.273	5.048
17260	66.782	0.303	No	No		8.472	0.282	0.282	8.472
17270	59.772	0.323	No	No		4.886	0.296	0.296	4.886
17280	66.528	0.298	No	No		20.24	0.328	0.328	20.24
17290	74.577	0.33	No	No		21.801	0.321	0.321	21.801
17300	70.922	0.315	No	No		26.213	0.276	0.276	26.213
17310	65.071	0.313	No	No		8.898	0.3	0.3	8.898
17320	60.106	0.302	No	No		7.489	0.308	0.308	7.489
17330	54.132	0.326	No	No		8.522	0.284	0.284	8.522
17340	60.625	0.295	No	No		21.036	0.309	0.309	21.036
17350	63.367	0.301	No	No		3.95	0.27	0.27	3.95
17360	68.265	0.322	No	No		16.32	0.276	0.276	16.32
17370	68.642	0.351	No	No		15.603	0.292	0.292	15.603
17380	72.355	0.348	No	No		1.694	0.271	0.271	1.694
17390	77.642	0.343	No	No		16.038	0.296	0.296	16.038
17400	71.174	0.308	No	No		5.326	0.267	0.267	5.326
17410	73.27	0.295	No	No		4.565	0.274	0.274	4.565
17420	72.614	0.299	No	No		8.624	0.276	0.276	8.624
17430	58.418	0.333	No	No		7.334	0.283	0.283	7.334
17440	69.145	0.314	No	No		11.538	0.287	0.287	11.538
17450	64.447	0.278	No	No		34.476	0.284	No	No
17460	78.105	0.306	No	No		48.056	0.308	No	No
17470	66.01	0.328	No	No		53.874	0.306	No	No
17480	56.291	0.291	No	No		64.676	0.287	No	No
17490	69.181	0.316	No	No		65.341	0.3	No	No
17500	70.543	0.334	No	No		55.362	0.313	No	No
17510	61.446	0.313	No	No		49.23	0.291	No	No
17520	42.431	0.297	No	No		46.045	0.311	No	No
17530	71.68	0.305	No	No		67.024	0.328	No	No
17540	77.207	0.344	No	No		56.379	0.317	No	No
17550	67.822	0.286	No	No		57.636	0.307	No	No
17560	60.281	0.304	No	No		65.92	0.3	No	No
17570	61.667	0.304	No	No		6.451	0.285	0.285	6.451
17580	49.383	0.321	No	No		6.816	0.268	0.268	6.816
17590	57.708	0.315	No	No		6.972	0.275	0.275	6.972
17600	55.526	0.316	No	No		45.686	0.32	No	No
17610	52.767	0.314	No	No		43.303	0.305	No	No
17620	59.366	0.299	No	No		54.009	0.318	No	No
17630	57.322	0.292	No	No		25.274	0.301	0.301	25.274
17640	76.463	0.311	No	No		3.988	0.316	0.316	3.988
17650	74.723	0.292	No	No		5.779	0.28	0.28	5.779
17660	48.105	0.307	No	No		24.021	0.292	0.292	24.021
17670	48.953	0.306	No	No		7.459	0.282	0.282	7.459
17680	58.842	0.301	No	No		3.234	0.271	0.271	3.234
17690	63.331	0.297	No	No		4.608	0.275	0.275	4.608
17700	55.466	0.314	No	No		23.608	0.29	0.29	23.608
17710	56.543	0.341	No	No		51.128	0.288	No	No
17720	57.453	0.306	No	No		56.457	0.317	No	No
17730	15.513	0.323	0.323	15.513		57.364	0.292	No	No
17740	62.746	0.302	No	No		51.873	0.311	No	No
17750	55.469	0.301	No	No		66.813	0.311	No	No
17760	51.243	0.303	No	No		56.706	0.355	No	No
17770	57.085	0.304	No	No		69.117	0.356	No	No
17780	61.747	0.3	No	No		61.46	0.343	No	No
17790	59.24	0.325	No	No		58.259	0.324	No	No
17800	70.151	0.307	No	No		57.975	0.348	No	No
17810	72.557	0.325	No	No		49.207	0.331	No	No
17820	67.066	0.317	No	No		46.018	0.306	No	No
17830	76.071	0.334	No	No		41.635	0.329	No	No
17840	61.58	0.314	No	No		64.63	0.277	No	No
17850	53.762	0.297	No	No		47.998	0.299	No	No
17860	55.882	0.305	No	No		3.199	0.285	0.285	3.199
17870	71.666	0.363	No	No		26.047	0.282	0.282	26.047
17880	56.193	0.305	No	No		63.053	0.285	No	No
17890	51.053	0.294	No	No		58.621	0.315	No	No
17900	54.893	0.359	No	No		48.02	0.36	No	No
17910	66.732	0.309	No	No		55.03	0.317	No	No
17920	65.177	0.322	No	No		50.387	0.324	No	No
17930	56.57	0.297	No	No		67.757	0.319	No	No
17940	80.33	0.314	No	No		57.745	0.322	No	No
17950	62.516	0.331	No	No		22.023	0.283	0.283	22.023
17960	71.959	0.336	No	No		49.012	0.311	No	No
17970	64.596	0.326	No	No		57.534	0.289	No	No
17980	58.949	0.329	No	No		55.146	0.295	No	No
17990	66.318	0.288	No	No		9.077	0.282	0.282	9.077
18000	68.867	0.323	No	No		9.096	0.27	0.27	9.096
18010	57.314	0.323	No	No		33.939	0.314	No	No
18020	69.183	0.298	No	No		21.839	0.29	0.29	21.839
18030	57.184	0.286	No	No		13.394	0.282	0.282	13.394
18040	75.565	0.331	No	No		58.736	0.319	No	No
18050	50.133	0.336	No	No		45.106	0.29	No	No
18060	57.468	0.318	No	No		55.695	0.283	No	No
18070	67.156	0.313	No	No		64.392	0.289	No	No
18080	59.066	0.323	No	No		63.687	0.308	No	No
18090	67.856	0.306	No	No		56.843	0.318	No	No
18100	61.212	0.313	No	No		66.836	0.323	No	No
18110	53.735	0.317	No	No		69.561	0.331	No	No
18120	53.11	0.312	No	No		58.04	0.318	No	No
18130	28.624	0.269	0.269	28.624		64.049	0.318	No	No
18140	5.004	0.296	0.296	5.004		53.893	0.283	No	No
18150	62.699	0.305	No	No		47.778	0.313	No	No
18160	51.003	0.316	No	No		44.704	0.311	No	No
18170	68.406	0.311	No	No		65.624	0.299	No	No
18180	55.98	0.297	No	No		61.303	0.323	No	No
18190	53.64	0.349	No	No		51.622	0.296	No	No
18200	60.185	0.291	No	No		42.545	0.327	No	No
18210	65.504	0.296	No	No		65.779	0.304	No	No
18220	48.772	0.325	No	No		46.434	0.312	No	No
18230	55.344	0.34	No	No		46.199	0.31	No	No
18240	63.194	0.346	No	No		10.679	0.294	0.294	10.679
18250	63.52	0.286	No	No		29.694	0.298	0.298	29.694
18260	59.535	0.319	No	No		21.241	0.281	0.281	21.241
18270	63.295	0.294	No	No		11.716	0.289	0.289	11.716
18280	73.63	0.299	No	No		60.966	0.345	No	No
18290	61.525	0.311	No	No		56.707	0.283	No	No
18300	58.718	0.313	No	No		57.492	0.312	No	No
18310	64.509	0.286	No	No		50.832	0.389	No	No
18320	45.816	0.315	No	No		76.763	0.287	No	No
18330	60.738	0.302	No	No		54.1	0.326	No	No
18340	59.097	0.319	No	No		56.117	0.304	No	No
18350	69.92	0.302	No	No		57.282	0.323	No	No
18360	67.726	0.306	No	No		55.883	0.301	No	No
18370	63.97	0.315	No	No		60.203	0.337	No	No
18380	50.665	0.318	No	No		49.55	0.32	No	No
18390	60.311	0.31	No	No		19.098	0.263	0.263	19.098
18400	66.762	0.303	No	No		11.278	0.276	0.276	11.278
18410	71.349	0.315	No	No		17.624	0.287	0.287	17.624
18420	60.384	0.288	No	No		3.796	0.272	0.272	3.796
18430	70.271	0.302	No	No		0.887	0.279	0.279	0.887
18440	63.719	0.306	No	No		13.431	0.301	0.301	13.431
18450	60.116	0.331	No	No		42.943	0.291	No	No
18460	64.008	0.3	No	No		12.614	0.287	0.287	12.614
18470	54.582	0.344	No	No		22.1	0.305	0.305	22.1
18480	72.402	0.316	No	No		56.365	0.318	No	No
18490	64.943	0.312	No	No		55.19	0.346	No	No
18500	78.139	0.343	No	No		50.567	0.322	No	No
18510	51.097	0.333	No	No		54.884	0.343	No	No
18520	61.223	0.331	No	No		52.09	0.329	No	No
18530	61.658	0.296	No	No		76.47	0.301	No	No
18540	31.78	0.301	No	No		64.245	0.341	No	No
18550	67.737	0.305	No	No		37.732	0.275	No	No
18560	59.252	0.32	No	No		56.027	0.299	No	No
18570	65.639	0.293	No	No		61.191	0.289	No	No
18580	49.005	0.327	No	No		53.481	0.29	No	No
18590	54.946	0.345	No	No		61.657	0.273	No	No
18600	61.768	0.306	No	No		57.621	0.302	No	No
18610	64.024	0.32	No	No		70.676	0.306	No	No
18620	67.223	0.321	No	No		86.833	0.342	No	No
18630	61.532	0.304	No	No		59.77	0.293	No	No
18640	60.334	0.322	No	No		61.358	0.298	No	No
18650	55.956	0.328	No	No		53.191	0.355	No	No
18660	50.173	0.302	No	No		15.401	0.302	0.302	15.401
18670	57.513	0.306	No	No		12.26	0.326	0.326	12.26
18680	60.924	0.329	No	No		12.64	0.288	0.288	12.64
18690	76.953	0.29	No	No		25.338	0.282	0.282	25.338
18700	59.311	0.305	No	No		58.887	0.315	No	No
18710	59.898	0.284	No	No		68.823	0.331	No	No
18720	58.019	0.31	No	No		80.53	0.312	No	No
18730	121.358	0.364	No	No		56.095	0.324	No	No
18740	64.745	0.332	No	No		17.211	0.305	0.305	17.211
18750	68.725	0.308	No	No		16.767	0.296	0.296	16.767
18760	61.614	0.332	No	No		7.995	0.29	0.29	7.995
18770	61.305	0.313	No	No		10.554	0.286	0.286	10.554
18780	60.545	0.309	No	No		13.299	0.285	0.285	13.299
18790	68.402	0.325	No	No		50.225	0.339	No	No
18800	58.963	0.307	No	No		62.364	0.312	No	No
18810	55.18	0.313	No	No		62.151	0.28	No	No
18820	67.305	0.31	No	No		75.586	0.322	No	No
18830	45.584	0.298	No	No		64.633	0.33	No	No
18840	61.201	0.309	No	No		56.64	0.321	No	No
18850	67.7	0.285	No	No		53.222	0.281	No	No
18860	60.111	0.29	No	No		51.474	0.3	No	No
18870	51.263	0.315	No	No		120.977	0.266	No	No
18880	47.661	0.3	No	No		61.893	0.308	No	No
18890	69.534	0.33	No	No		65.795	0.326	No	No
18900	83.761	0.277	No	No		4.402	0.273	0.273	4.402
18910	56.12	0.317	No	No		62.837	0.342	No	No
18920	65.516	0.313	No	No		18.001	0.304	0.304	18.001
18930	45.359	0.307	No	No		17.108	0.306	0.306	17.108
18940	62.503	0.3	No	No		5.809	0.273	0.273	5.809
18950	66.322	0.316	No	No		24.546	0.286	0.286	24.546
18960	43.503	0.349	No	No		55.883	0.316	No	No
18970	55.312	0.307	No	No		11.988	0.274	0.274	11.988
18980	62.445	0.316	No	No		24.996	0.313	0.313	24.996
18990	64.425	0.304	No	No		20.585	0.281	0.281	20.585
19000	78.766	0.3	No	No		8.34	0.288	0.288	8.34
19010	52.418	0.317	No	No		7.057	0.268	0.268	7.057
19020	51.815	0.291	No	No		11.184	0.277	0.277	11.184
19030	65.882	0.336	No	No		3.851	0.297	0.297	3.851
19040	54.872	0.33	No	No		10.436	0.288	0.288	10.436
19050	22.255	0.266	0.266	22.255		13.964	0.299	0.299	13.964
19060	59.423	0.295	No	No		38.09	0.324	No	No
19070	17.163	0.285	0.285	17.163		4.573	0.291	0.291	4.573
19080	13.505	0.295	0.295	13.505		7.909	0.294	0.294	7.909
19090	46.262	0.296	No	No		19.582	0.277	0.277	19.582
19100	63.288	0.307	No	No		9.205	0.297	0.297	9.205
19110	62.994	0.309	No	No		13.901	0.288	0.288	13.901
19120	47.177	0.29	No	No		19.62	0.278	0.278	19.62
19130	60.539	0.328	No	No		6.186	0.276	0.276	6.186
19140	66.319	0.302	No	No		10.379	0.277	0.277	10.379
19150	59.193	0.295	No	No		14.827	0.298	0.298	14.827
19160	61.72	0.293	No	No		66.8	0.286	No	No
19170	56.52	0.348	No	No		16.122	0.296	0.296	16.122
19180	59.944	0.307	No	No		4.871	0.297	0.297	4.871
19190	44.683	0.336	No	No		70.704	0.313	No	No
19200	49.295	0.325	No	No		57.696	0.307	No	No
19210	57.42	0.309	No	No		60.061	0.309	No	No
19220	63.481	0.29	No	No		51.813	0.324	No	No
19230	60.725	0.286	No	No		22.987	0.3	0.3	22.987
19240	56.627	0.321	No	No		6.944	0.29	0.29	6.944
19250	14.877	0.284	0.284	14.877		18.978	0.278	0.278	18.978
19260	59.602	0.334	No	No		21.165	0.282	0.282	21.165
19270	37.451	0.294	No	No		11.385	0.273	0.273	11.385
19280	52.478	0.283	No	No		54.56	0.352	No	No
19290	46.296	0.334	No	No		64.53	0.329	No	No
19300	43.775	0.282	No	No		69.115	0.308	No	No
19310	61.366	0.285	No	No		57.212	0.296	No	No
19320	64.594	0.304	No	No		57.572	0.303	No	No
19330	11.222	0.271	0.271	11.222		64.267	0.316	No	No
19340	65.744	0.282	No	No		65.15	0.295	No	No
19350	61.977	0.291	No	No		62.936	0.286	No	No
19360	62.988	0.279	No	No		51.589	0.305	No	No
19370	52.407	0.281	No	No		55.155	0.32	No	No
19380	63.722	0.301	No	No		51.291	0.321	No	No
19390	61.092	0.296	No	No		57.265	0.308	No	No
19400	55.588	0.305	No	No		53.797	0.31	No	No
19410	56.897	0.314	No	No		62.337	0.322	No	No
19420	72.582	0.32	No	No		65.094	0.317	No	No
19430	51.716	0.325	No	No		59.669	0.293	No	No
19440	72.215	0.311	No	No		62.19	0.292	No	No
19450	54.853	0.29	No	No		38.251	0.293	No	No
19460	79.387	0.296	No	No		61.342	0.316	No	No
19470	75.198	0.305	No	No		58.109	0.309	No	No
19480	49.857	0.313	No	No		18.731	0.278	0.278	18.731
19490	56.267	0.304	No	No		64.196	0.312	No	No
19500	66.702	0.312	No	No		68.333	0.309	No	No
19510	51.848	0.329	No	No		75.681	0.318	No	No
19520	41.437	0.302	No	No		74.858	0.289	No	No
19530	55.605	0.321	No	No		41.102	0.289	No	No
19540	73.619	0.302	No	No		57.716	0.308	No	No
19550	60.775	0.273	No	No		68.096	0.288	No	No
19560	64.02	0.283	No	No		60.626	0.297	No	No
19570	77.121	0.293	No	No		61.522	0.314	No	No
19580	64.189	0.308	No	No		47.966	0.287	No	No
19590	67.988	0.323	No	No		58.722	0.311	No	No
19600	63.678	0.272	No	No		70.106	0.296	No	No
19610	62.939	0.311	No	No		69.76	0.281	No	No
19620	47.974	0.306	No	No		56.185	0.321	No	No
19630	68.397	0.357	No	No		70.471	0.276	No	No
19640	57.311	0.3	No	No		72.522	0.282	No	No
19650	49.849	0.321	No	No		69.274	0.297	No	No
19660	47.806	0.328	No	No		7.918	0.304	0.304	7.918
19670	66.533	0.304	No	No		8.528	0.28	0.28	8.528
19680	67.185	0.319	No	No		4.744	0.26	0.26	4.744
19690	57.598	0.303	No	No		9.994	0.257	0.257	9.994
19700	58.564	0.346	No	No		10.322	0.269	0.269	10.322
19710	67.959	0.313	No	No		25.163	0.301	0.301	25.163
19720	60.845	0.319	No	No		15.964	0.274	0.274	15.964
19730	69.7	0.281	No	No		23.995	0.349	0.349	23.995
19740	67.336	0.3	No	No		11.605	0.288	0.288	11.605
19750	70.71	0.306	No	No		13.701	0.289	0.289	13.701
19760	90.608	0.31	No	No		7.777	0.29	0.29	7.777
19770	58.836	0.325	No	No		34.528	0.322	No	No
19780	74.331	0.306	No	No		28.114	0.285	0.285	28.114
19790	72.977	0.321	No	No		50.092	0.296	No	No
19800	45.994	0.288	No	No		54.921	0.345	No	No
19810	65.144	0.323	No	No		64.084	0.33	No	No
19820	68.946	0.28	No	No		61.714	0.292	No	No
19830	68.623	0.314	No	No		67.515	0.294	No	No
19840	67.964	0.32	No	No		62.841	0.294	No	No
19850	68.03	0.335	No	No		73.075	0.348	No	No
19860	59.182	0.312	No	No		38.79	0.304	No	No
19870	73.621	0.327	No	No		49.224	0.319	No	No
19880	58.715	0.288	No	No		57.462	0.353	No	No
19890	82.355	0.297	No	No		16.425	0.317	0.317	16.425
19900	63.256	0.289	No	No		47.444	0.316	No	No
19910	49.669	0.293	No	No		65.823	0.307	No	No
19920	65.342	0.3	No	No		64.079	0.303	No	No
19930	58.986	0.321	No	No		66.634	0.313	No	No
19940	49.075	0.3	No	No		75.775	0.312	No	No
19950	76.514	0.324	No	No		60.111	0.285	No	No
19960	64.271	0.313	No	No		53.853	0.305	No	No
19970	55.119	0.291	No	No		66.79	0.318	No	No
19980	70.951	0.313	No	No		57.486	0.316	No	No
[truncated: 3,011 more rows]

## Sheet: Thr500...Asp355
Time	Thr500…Asp355 N501 angle	Thr500…Asp355 N501 dist	dist<=0.35 nm	angle<=30 deg.		Thr500…Asp355 N501Y angle	Thr500…Asp355 N501Y dist	dist<=0.35 nm	angle<=30 deg.
0	46.94	0.406	No	No		44.533	0.461	No	No
10	52.363	0.362	No	No		19.369	0.269	0.269	19.369
20	48.382	0.393	No	No		9.966	0.279	0.279	9.966
30	44.686	0.435	No	No		13.183	0.276	0.276	13.183
40	13.696	0.262	0.262	13.696		27.912	0.291	0.291	27.912
50	4.181	0.279	0.279	4.181		14.078	0.293	0.293	14.078
60	9.242	0.266	0.266	9.242		9.317	0.264	0.264	9.317
70	53.592	0.362	No	No		12.533	0.279	0.279	12.533
80	40.875	0.463	No	No		1.578	0.261	0.261	1.578
90	34.008	0.419	No	No		16.32	0.316	0.316	16.32
100	37.278	0.413	No	No		21.689	0.283	0.283	21.689
110	51.195	0.42	No	No		11.518	0.264	0.264	11.518
120	7.68	0.264	0.264	7.68		12.894	0.34	0.34	12.894
130	6.387	0.261	0.261	6.387		20.486	0.29	0.29	20.486
140	17.579	0.284	0.284	17.579		23.093	0.287	0.287	23.093
150	18.114	0.315	0.315	18.114		7.493	0.272	0.272	7.493
160	47.373	0.356	No	No		13.73	0.333	0.333	13.73
170	24.62	0.417	No	No		6.249	0.272	0.272	6.249
180	10.091	0.258	0.258	10.091		10.989	0.256	0.256	10.989
190	14.041	0.261	0.261	14.041		17.717	0.305	0.305	17.717
200	12.773	0.262	0.262	12.773		19.781	0.347	0.347	19.781
210	58.132	0.371	No	No		18.331	0.266	0.266	18.331
220	32.146	0.439	No	No		18.43	0.279	0.279	18.43
230	69.616	0.462	No	No		13.962	0.275	0.275	13.962
240	40.602	0.44	No	No		9.445	0.274	0.274	9.445
250	42.697	0.409	No	No		11.986	0.319	0.319	11.986
260	75.927	0.429	No	No		25.568	0.291	0.291	25.568
270	77.652	0.462	No	No		10.039	0.266	0.266	10.039
280	47.702	0.464	No	No		13.688	0.28	0.28	13.688
290	43.343	0.376	No	No		16.176	0.275	0.275	16.176
300	38.752	0.471	No	No		15.737	0.273	0.273	15.737
310	63.292	0.434	No	No		17.27	0.28	0.28	17.27
320	43.736	0.402	No	No		6.981	0.262	0.262	6.981
330	54.81	0.447	No	No		9.6	0.267	0.267	9.6
340	29.267	0.511	No	No		26.939	0.288	0.288	26.939
350	68.108	0.379	No	No		18.297	0.283	0.283	18.297
360	43.185	0.432	No	No		14.696	0.297	0.297	14.696
370	47.583	0.409	No	No		42.03	0.457	No	No
380	40.07	0.333	No	No		7.943	0.284	0.284	7.943
390	46.454	0.398	No	No		7.533	0.299	0.299	7.533
400	38.499	0.434	No	No		7.215	0.26	0.26	7.215
410	44.145	0.467	No	No		10.585	0.279	0.279	10.585
420	43.475	0.441	No	No		10.154	0.274	0.274	10.154
430	40.822	0.378	No	No		11.333	0.251	0.251	11.333
440	62.24	0.456	No	No		16.528	0.294	0.294	16.528
450	36.22	0.485	No	No		49.864	0.405	No	No
460	56.186	0.46	No	No		23.87	0.379	No	No
470	31.756	0.405	No	No		41.622	0.422	No	No
480	42.417	0.435	No	No		52.271	0.42	No	No
490	47.357	0.369	No	No		50.809	0.458	No	No
500	6.941	0.26	0.26	6.941		31.961	0.388	No	No
510	9.651	0.283	0.283	9.651		40.33	0.393	No	No
520	48.581	0.379	No	No		69.485	0.482	No	No
530	27.739	0.315	0.315	27.739		27.679	0.472	No	No
540	32.239	0.41	No	No		44.04	0.448	No	No
550	56.526	0.382	No	No		46.005	0.453	No	No
560	40.05	0.386	No	No		36.505	0.418	No	No
570	50.903	0.406	No	No		30.769	0.425	No	No
580	65.356	0.386	No	No		39.171	0.398	No	No
590	39.109	0.389	No	No		33.107	0.461	No	No
600	59.063	0.454	No	No		40.97	0.422	No	No
610	48.051	0.407	No	No		41.788	0.405	No	No
620	46.026	0.384	No	No		3.52	0.27	0.27	3.52
630	44.819	0.416	No	No		46.28	0.449	No	No
640	48.994	0.395	No	No		36.838	0.436	No	No
650	39.617	0.374	No	No		58.829	0.426	No	No
660	47.357	0.379	No	No		35.193	0.389	No	No
670	49.394	0.43	No	No		43.616	0.433	No	No
680	49.965	0.413	No	No		52.089	0.41	No	No
690	50.933	0.445	No	No		31.714	0.409	No	No
700	40.175	0.389	No	No		38.117	0.428	No	No
710	34.941	0.393	No	No		54.577	0.421	No	No
720	23.971	0.306	0.306	23.971		46.311	0.467	No	No
730	49.673	0.434	No	No		57.467	0.547	No	No
740	42.53	0.397	No	No		42.341	0.392	No	No
750	36.243	0.425	No	No		26.616	0.413	No	No
760	52.583	0.434	No	No		44.25	0.393	No	No
770	8.95	0.268	0.268	8.95		45.526	0.408	No	No
780	17.647	0.32	0.32	17.647		45.71	0.432	No	No
790	43.013	0.382	No	No		36.473	0.402	No	No
800	50.667	0.345	No	No		60.474	0.426	No	No
810	45.614	0.415	No	No		42.108	0.467	No	No
820	41.488	0.39	No	No		37.056	0.437	No	No
830	48.457	0.405	No	No		55.77	0.405	No	No
840	51.044	0.38	No	No		60.92	0.403	No	No
850	42.305	0.386	No	No		29.328	0.384	No	No
860	37.385	0.412	No	No		72.16	0.434	No	No
870	50.629	0.4	No	No		68.595	0.491	No	No
880	42.887	0.436	No	No		34.126	0.43	No	No
890	23.878	0.337	0.337	23.878		67.583	0.41	No	No
900	36.485	0.404	No	No		48.532	0.432	No	No
910	49.06	0.439	No	No		77.421	0.36	No	No
920	53.289	0.389	No	No		38.043	0.388	No	No
930	48.956	0.468	No	No		36.614	0.422	No	No
940	48.529	0.4	No	No		48.696	0.41	No	No
950	40.935	0.413	No	No		82.732	0.504	No	No
960	34.86	0.411	No	No		60.876	0.488	No	No
970	47.251	0.408	No	No		46.608	0.416	No	No
980	11.153	0.282	0.282	11.153		42.04	0.393	No	No
990	2.543	0.262	0.262	2.543		41.795	0.431	No	No
1000	33.829	0.401	No	No		69.229	0.413	No	No
1010	55.838	0.413	No	No		49.817	0.447	No	No
1020	44.333	0.434	No	No		48.872	0.389	No	No
1030	22.225	0.295	0.295	22.225		51.902	0.448	No	No
1040	15.373	0.269	0.269	15.373		63.16	0.448	No	No
1050	17.204	0.289	0.289	17.204		57.694	0.434	No	No
1060	13.617	0.285	0.285	13.617		45.473	0.423	No	No
1070	62.158	0.383	No	No		27.299	0.394	No	No
1080	56.645	0.432	No	No		70.069	0.402	No	No
1090	52.852	0.373	No	No		62.507	0.4	No	No
1100	63.637	0.361	No	No		55.632	0.398	No	No
1110	56.249	0.367	No	No		40.682	0.418	No	No
1120	72.907	0.395	No	No		48.807	0.392	No	No
1130	45.308	0.378	No	No		49.576	0.417	No	No
1140	55.05	0.403	No	No		58.111	0.394	No	No
1150	56.698	0.339	No	No		60.201	0.363	No	No
1160	35.083	0.329	No	No		65.737	0.479	No	No
1170	3.808	0.263	0.263	3.808		41.954	0.363	No	No
1180	19.621	0.296	0.296	19.621		66.598	0.4	No	No
1190	10.222	0.275	0.275	10.222		35.417	0.384	No	No
1200	26.533	0.285	0.285	26.533		51.184	0.38	No	No
1210	29.914	0.329	0.329	29.914		79.538	0.553	No	No
1220	14.935	0.35	0.35	14.935		43.746	0.372	No	No
1230	60.546	0.44	No	No		43.776	0.426	No	No
1240	67.596	0.423	No	No		55.847	0.398	No	No
1250	50.795	0.455	No	No		38.24	0.437	No	No
1260	52.897	0.425	No	No		39.654	0.452	No	No
1270	70.617	0.446	No	No		46.84	0.377	No	No
1280	40.777	0.308	No	No		43.966	0.438	No	No
1290	45.782	0.363	No	No		63.613	0.405	No	No
1300	50.403	0.363	No	No		46.26	0.418	No	No
1310	42.899	0.321	No	No		64.595	0.447	No	No
1320	71.49	0.429	No	No		55.596	0.417	No	No
1330	88.19	0.433	No	No		39.849	0.5	No	No
1340	62.495	0.4	No	No		39.06	0.398	No	No
1350	68.301	0.385	No	No		43.504	0.392	No	No
1360	66.831	0.352	No	No		45.445	0.459	No	No
1370	65.84	0.381	No	No		36.196	0.362	No	No
1380	42.338	0.403	No	No		45.597	0.38	No	No
1390	76.145	0.407	No	No		53.943	0.407	No	No
1400	58.478	0.391	No	No		66.378	0.432	No	No
1410	70.723	0.383	No	No		47.275	0.435	No	No
1420	62.394	0.416	No	No		60.239	0.46	No	No
1430	50.396	0.37	No	No		52.657	0.389	No	No
1440	80.913	0.368	No	No		24.31	0.405	No	No
1450	54.449	0.474	No	No		45.193	0.402	No	No
1460	62.248	0.434	No	No		26.792	0.428	No	No
1470	52.12	0.469	No	No		59.34	0.484	No	No
1480	59.687	0.401	No	No		42.165	0.406	No	No
1490	71.023	0.45	No	No		33.15	0.368	No	No
1500	60.419	0.426	No	No		41.876	0.401	No	No
1510	61.712	0.388	No	No		43.549	0.417	No	No
1520	64.03	0.358	No	No		33.63	0.413	No	No
1530	60.881	0.394	No	No		46.082	0.361	No	No
1540	69.989	0.417	No	No		47.844	0.398	No	No
1550	60.813	0.402	No	No		51.461	0.416	No	No
1560	63.923	0.366	No	No		7.108	0.301	0.301	7.108
1570	60.1	0.358	No	No		70.872	0.463	No	No
1580	60.835	0.442	No	No		39.193	0.395	No	No
1590	41.793	0.454	No	No		21.245	0.419	No	No
1600	57.784	0.406	No	No		41.875	0.354	No	No
1610	67.4	0.382	No	No		83.697	0.418	No	No
1620	59.258	0.432	No	No		37.714	0.391	No	No
1630	69.055	0.426	No	No		22.515	0.266	0.266	22.515
1640	64.988	0.443	No	No		16.107	0.326	0.326	16.107
1650	61.634	0.454	No	No		15.182	0.279	0.279	15.182
1660	83.557	0.392	No	No		27.858	0.331	0.331	27.858
1670	84.537	0.476	No	No		6.858	0.276	0.276	6.858
1680	5.863	0.269	0.269	5.863		38.442	0.413	No	No
1690	10.855	0.274	0.274	10.855		58.42	0.443	No	No
1700	12.718	0.29	0.29	12.718		9.362	0.256	0.256	9.362
1710	18.439	0.265	0.265	18.439		16.258	0.27	0.27	16.258
1720	7.959	0.262	0.262	7.959		30.827	0.288	No	No
1730	68.488	0.409	No	No		24.232	0.286	0.286	24.232
1740	17.319	0.314	0.314	17.319		37.921	0.358	No	No
1750	13.395	0.266	0.266	13.395		48.275	0.384	No	No
1760	1.638	0.254	0.254	1.638		41.364	0.397	No	No
1770	19.979	0.27	0.27	19.979		69.396	0.406	No	No
1780	56.478	0.483	No	No		68.199	0.426	No	No
1790	69.379	0.412	No	No		66.741	0.495	No	No
1800	60.704	0.476	No	No		52.221	0.418	No	No
1810	45.863	0.434	No	No		65.672	0.394	No	No
1820	64.821	0.456	No	No		95.964	0.4	No	No
1830	41.002	0.346	No	No		59.13	0.429	No	No
1840	7.019	0.253	0.253	7.019		46.223	0.382	No	No
1850	21.126	0.272	0.272	21.126		57.255	0.456	No	No
1860	53.199	0.358	No	No		34.304	0.386	No	No
1870	69.34	0.423	No	No		76.328	0.446	No	No
1880	44.489	0.483	No	No		69.631	0.426	No	No
1890	69.907	0.424	No	No		76.666	0.579	No	No
1900	60.515	0.392	No	No		76.979	0.565	No	No
1910	57.962	0.462	No	No		46.609	0.518	No	No
1920	59.234	0.448	No	No		20.862	0.438	No	No
1930	62.327	0.485	No	No		26.893	0.47	No	No
1940	55.358	0.394	No	No		15.342	0.486	No	No
1950	57.861	0.425	No	No		38.199	0.483	No	No
1960	58.269	0.407	No	No		56.439	0.416	No	No
1970	58.532	0.345	No	No		30.54	0.504	No	No
1980	29.874	0.314	0.314	29.874		29.54	0.476	No	No
1990	12.099	0.292	0.292	12.099		46.587	0.458	No	No
2000	29.149	0.282	0.282	29.149		18.742	0.496	No	No
2010	15.687	0.29	0.29	15.687		45.091	0.485	No	No
2020	6.83	0.276	0.276	6.83		37.671	0.352	No	No
2030	8.146	0.295	0.295	8.146		53.003	0.462	No	No
2040	22.773	0.32	0.32	22.773		35.349	0.395	No	No
2050	21.046	0.256	0.256	21.046		31.934	0.451	No	No
2060	9.117	0.255	0.255	9.117		40.981	0.39	No	No
2070	27.516	0.27	0.27	27.516		37.788	0.436	No	No
2080	7.83	0.252	0.252	7.83		33.524	0.435	No	No
2090	5.827	0.282	0.282	5.827		44.368	0.413	No	No
2100	8.194	0.283	0.283	8.194		48.467	0.464	No	No
2110	10.971	0.258	0.258	10.971		40.55	0.453	No	No
2120	2.455	0.269	0.269	2.455		29.839	0.454	No	No
2130	12.804	0.268	0.268	12.804		45.112	0.44	No	No
2140	13.758	0.266	0.266	13.758		37.62	0.48	No	No
2150	6.764	0.254	0.254	6.764		40.193	0.448	No	No
2160	22.6	0.315	0.315	22.6		37.083	0.472	No	No
2170	8.365	0.28	0.28	8.365		41.938	0.445	No	No
2180	22.273	0.254	0.254	22.273		36.208	0.426	No	No
2190	25.915	0.274	0.274	25.915		38.367	0.411	No	No
2200	51.974	0.319	No	No		22.569	0.345	0.345	22.569
2210	43.282	0.365	No	No		40.02	0.495	No	No
2220	40.944	0.478	No	No		35.148	0.409	No	No
2230	37.75	0.423	No	No		44.709	0.385	No	No
2240	15.506	0.271	0.271	15.506		12.922	0.263	0.263	12.922
2250	53.787	0.396	No	No		13.937	0.265	0.265	13.937
2260	48.407	0.415	No	No		16.857	0.28	0.28	16.857
2270	20.1	0.324	0.324	20.1		17.366	0.26	0.26	17.366
2280	30.96	0.4	No	No		18.278	0.264	0.264	18.278
2290	3.624	0.254	0.254	3.624		10.582	0.273	0.273	10.582
2300	18.656	0.313	0.313	18.656		3.405	0.299	0.299	3.405
2310	30.885	0.303	No	No		44.082	0.384	No	No
2320	9.073	0.3	0.3	9.073		6.361	0.278	0.278	6.361
2330	15.245	0.264	0.264	15.245		5.64	0.251	0.251	5.64
2340	15.137	0.264	0.264	15.137		51.182	0.403	No	No
2350	13.381	0.272	0.272	13.381		34.528	0.426	No	No
2360	8.812	0.259	0.259	8.812		40.318	0.414	No	No
2370	33.956	0.38	No	No		45.159	0.419	No	No
2380	11.377	0.436	No	No		45.339	0.393	No	No
2390	32.193	0.341	No	No		4.581	0.278	0.278	4.581
2400	7.943	0.276	0.276	7.943		15.232	0.268	0.268	15.232
2410	37.792	0.392	No	No		21.155	0.274	0.274	21.155
2420	6.841	0.293	0.293	6.841		50.089	0.409	No	No
2430	24.08	0.264	0.264	24.08		20.54	0.323	0.323	20.54
2440	3.276	0.29	0.29	3.276		13.184	0.266	0.266	13.184
2450	3.635	0.264	0.264	3.635		11.403	0.314	0.314	11.403
2460	14.624	0.269	0.269	14.624		18.835	0.297	0.297	18.835
2470	17.343	0.3	0.3	17.343		11.794	0.282	0.282	11.794
2480	22.62	0.273	0.273	22.62		5.588	0.267	0.267	5.588
2490	5.69	0.282	0.282	5.69		28.349	0.319	0.319	28.349
2500	20.977	0.315	0.315	20.977		5.166	0.3	0.3	5.166
2510	8.198	0.259	0.259	8.198		53.401	0.435	No	No
2520	9.895	0.274	0.274	9.895		8.108	0.264	0.264	8.108
2530	11.252	0.255	0.255	11.252		31.434	0.424	No	No
2540	25.607	0.302	0.302	25.607		51.613	0.424	No	No
2550	8.339	0.29	0.29	8.339		45.167	0.381	No	No
2560	4.566	0.275	0.275	4.566		57.66	0.362	No	No
2570	14.828	0.304	0.304	14.828		52.56	0.516	No	No
2580	14.973	0.275	0.275	14.973		84.25	0.436	No	No
2590	5.316	0.284	0.284	5.316		52.931	0.485	No	No
2600	20.037	0.313	0.313	20.037		75.704	0.495	No	No
2610	29.683	0.281	0.281	29.683		88.893	0.402	No	No
2620	9.02	0.256	0.256	9.02		30.271	0.459	No	No
2630	23.994	0.274	0.274	23.994		29.611	0.476	No	No
2640	20.52	0.302	0.302	20.52		40.995	0.448	No	No
2650	11.496	0.264	0.264	11.496		42.955	0.465	No	No
2660	34.112	0.281	No	No		56.955	0.351	No	No
2670	29.102	0.264	0.264	29.102		44.576	0.37	No	No
2680	20.835	0.31	0.31	20.835		26.234	0.414	No	No
2690	17.08	0.277	0.277	17.08		47.667	0.42	No	No
2700	1.737	0.299	0.299	1.737		57.772	0.397	No	No
2710	32.476	0.388	No	No		38.33	0.435	No	No
2720	50.227	0.394	No	No		33.413	0.456	No	No
2730	22.368	0.387	No	No		66.075	0.535	No	No
2740	10.587	0.286	0.286	10.587		61.523	0.552	No	No
2750	9.214	0.252	0.252	9.214		49.905	0.563	No	No
2760	18.664	0.308	0.308	18.664		54.698	0.518	No	No
2770	16.401	0.31	0.31	16.401		86.209	0.653	No	No
2780	9.219	0.299	0.299	9.219		65.052	0.555	No	No
2790	18.453	0.266	0.266	18.453		91.467	0.637	No	No
2800	12.771	0.272	0.272	12.771		55.872	0.575	No	No
2810	11.35	0.29	0.29	11.35		56.558	0.591	No	No
2820	8.548	0.264	0.264	8.548		55.347	0.636	No	No
2830	16.927	0.302	0.302	16.927		45.165	0.606	No	No
2840	12.161	0.287	0.287	12.161		63.801	0.621	No	No
2850	36.009	0.295	No	No		44.455	0.56	No	No
2860	12.269	0.278	0.278	12.269		47.963	0.637	No	No
2870	38.974	0.371	No	No		46.777	0.565	No	No
2880	6.828	0.305	0.305	6.828		67.754	0.538	No	No
2890	24.533	0.297	0.297	24.533		59.765	0.643	No	No
2900	7.553	0.263	0.263	7.553		57.797	0.514	No	No
2910	12.388	0.289	0.289	12.388		48.914	0.484	No	No
2920	22.333	0.282	0.282	22.333		41.761	0.475	No	No
2930	13.684	0.282	0.282	13.684		42.71	0.517	No	No
2940	6.499	0.301	0.301	6.499		42.558	0.459	No	No
2950	7.115	0.254	0.254	7.115		83.781	0.543	No	No
2960	27.467	0.334	0.334	27.467		36.34	0.516	No	No
2970	69.853	0.465	No	No		43.741	0.512	No	No
2980	69.693	0.439	No	No		78.649	0.531	No	No
2990	8.306	0.303	0.303	8.306		83.504	0.647	No	No
3000	58.98	0.403	No	No		97.372	0.578	No	No
3010	17.108	0.418	No	No		36.3	0.521	No	No
3020	12.541	0.292	0.292	12.541		38.659	0.499	No	No
3030	40.407	0.38	No	No		39.385	0.599	No	No
3040	25.975	0.41	No	No		43.196	0.513	No	No
3050	41.677	0.368	No	No		24.008	0.561	No	No
3060	26.071	0.33	0.33	26.071		79.465	0.6	No	No
3070	11.172	0.284	0.284	11.172		73.87	0.656	No	No
3080	12.379	0.324	0.324	12.379		68.109	0.775	No	No
3090	7.073	0.293	0.293	7.073		87.259	0.675	No	No
3100	19.669	0.326	0.326	19.669		98.003	0.695	No	No
3110	10.11	0.264	0.264	10.11		81.298	0.674	No	No
3120	4.784	0.268	0.268	4.784		95.629	0.73	No	No
3130	21.65	0.291	0.291	21.65		87.319	0.662	No	No
3140	9.118	0.298	0.298	9.118		118.346	0.654	No	No
3150	15.86	0.324	0.324	15.86		95.342	0.643	No	No
3160	16.709	0.277	0.277	16.709		99.165	0.728	No	No
3170	5.9	0.296	0.296	5.9		80.325	0.719	No	No
3180	13.257	0.288	0.288	13.257		85.32	0.752	No	No
3190	20.769	0.31	0.31	20.769		89.093	0.695	No	No
3200	20.475	0.278	0.278	20.475		90.891	0.684	No	No
3210	13.807	0.266	0.266	13.807		101.884	0.68	No	No
3220	4.935	0.279	0.279	4.935		92.653	0.663	No	No
3230	9.176	0.258	0.258	9.176		80.239	0.648	No	No
3240	50.024	0.393	No	No		98.31	0.675	No	No
3250	47.217	0.409	No	No		91.575	0.619	No	No
3260	41.499	0.321	No	No		98.336	0.669	No	No
3270	30.998	0.291	No	No		91.313	0.607	No	No
3280	33.528	0.334	No	No		114.362	0.657	No	No
3290	31.43	0.364	No	No		92.559	0.647	No	No
3300	17.34	0.272	0.272	17.34		101.049	0.678	No	No
3310	11.039	0.273	0.273	11.039		102.554	0.737	No	No
3320	5.258	0.28	0.28	5.258		98.286	0.627	No	No
3330	10.798	0.269	0.269	10.798		109.446	0.683	No	No
3340	80.497	0.395	No	No		80.11	0.63	No	No
3350	8.66	0.285	0.285	8.66		76.033	0.604	No	No
3360	13.217	0.287	0.287	13.217		82.514	0.615	No	No
3370	38.181	0.392	No	No		68.078	0.663	No	No
3380	44.797	0.391	No	No		96.589	0.714	No	No
3390	6.5	0.276	0.276	6.5		71.186	0.679	No	No
3400	11.411	0.266	0.266	11.411		88.789	0.686	No	No
3410	16.225	0.282	0.282	16.225		90.742	0.652	No	No
3420	8.842	0.306	0.306	8.842		73.595	0.623	No	No
3430	8.79	0.261	0.261	8.79		71.107	0.635	No	No
3440	5.952	0.271	0.271	5.952		77.721	0.698	No	No
3450	2.692	0.255	0.255	2.692		54.384	0.599	No	No
3460	2.332	0.261	0.261	2.332		95.415	0.689	No	No
3470	12.726	0.272	0.272	12.726		68.706	0.689	No	No
3480	0.276	0.275	0.275	0.276		57.731	0.588	No	No
3490	16.82	0.281	0.281	16.82		93.959	0.621	No	No
3500	14.327	0.265	0.265	14.327		73.25	0.607	No	No
3510	9.187	0.27	0.27	9.187		89.099	0.677	No	No
3520	10.374	0.277	0.277	10.374		102.437	0.629	No	No
3530	27.876	0.286	0.286	27.876		82.299	0.718	No	No
3540	9.435	0.27	0.27	9.435		76.073	0.732	No	No
3550	9.768	0.277	0.277	9.768		53.82	0.669	No	No
3560	9.389	0.283	0.283	9.389		97.89	0.724	No	No
3570	7.97	0.267	0.267	7.97		93.014	0.795	No	No
3580	9.06	0.274	0.274	9.06		113.798	0.685	No	No
3590	4.75	0.267	0.267	4.75		81.691	0.667	No	No
3600	9.279	0.272	0.272	9.279		93.329	0.717	No	No
3610	18.739	0.25	0.25	18.739		95.794	0.728	No	No
3620	10.32	0.274	0.274	10.32		114.925	0.687	No	No
3630	12.035	0.26	0.26	12.035		101.131	0.65	No	No
3640	4.592	0.271	0.271	4.592		83.973	0.762	No	No
3650	9.095	0.291	0.291	9.095		86.983	0.72	No	No
3660	75.846	0.363	No	No		89.192	0.687	No	No
3670	61.345	0.379	No	No		93.099	0.633	No	No
3680	56.826	0.401	No	No		80.945	0.73	No	No
3690	29.47	0.336	0.336	29.47		104.697	0.764	No	No
3700	52.888	0.43	No	No		88.384	0.695	No	No
3710	65.107	0.36	No	No		104.613	0.658	No	No
3720	67.285	0.437	No	No		98.649	0.642	No	No
3730	81.648	0.451	No	No		87.514	0.634	No	No
3740	51.381	0.41	No	No		96.16	0.658	No	No
3750	60.462	0.368	No	No		82.302	0.726	No	No
3760	11.456	0.269	0.269	11.456		93.899	0.671	No	No
3770	43.813	0.356	No	No		97.851	0.658	No	No
3780	52.633	0.423	No	No		82.087	0.7	No	No
3790	6.812	0.285	0.285	6.812		102.416	0.67	No	No
3800	69.067	0.386	No	No		94.073	0.625	No	No
3810	58.158	0.42	No	No		94.426	0.747	No	No
3820	52.249	0.447	No	No		97.886	0.693	No	No
3830	64.213	0.461	No	No		78.115	0.619	No	No
3840	64.635	0.399	No	No		96.378	0.655	No	No
3850	65.704	0.42	No	No		91.08	0.7	No	No
3860	67.293	0.361	No	No		102.189	0.703	No	No
3870	51.851	0.348	No	No		88.633	0.744	No	No
3880	10.008	0.26	0.26	10.008		78.882	0.674	No	No
3890	8.299	0.284	0.284	8.299		106.127	0.669	No	No
3900	42.04	0.374	No	No		88.144	0.69	No	No
3910	53.981	0.387	No	No		108.17	0.628	No	No
3920	51.334	0.362	No	No		103.685	0.633	No	No
3930	49.629	0.398	No	No		89.901	0.754	No	No
3940	40.835	0.395	No	No		85.395	0.714	No	No
3950	50.395	0.352	No	No		96.817	0.725	No	No
3960	46.994	0.395	No	No		93.676	0.663	No	No
3970	38.94	0.395	No	No		95.462	0.61	No	No
3980	32.479	0.409	No	No		68.195	0.685	No	No
3990	54.772	0.434	No	No		98.938	0.645	No	No
4000	40.886	0.382	No	No		80.603	0.691	No	No
4010	33.712	0.452	No	No		83.726	0.669	No	No
4020	46.015	0.432	No	No		80.008	0.572	No	No
4030	49.327	0.386	No	No		92.854	0.597	No	No
4040	32.465	0.393	No	No		91.375	0.61	No	No
4050	31.198	0.455	No	No		80.77	0.63	No	No
4060	37.786	0.436	No	No		82.458	0.664	No	No
4070	34.896	0.443	No	No		80.266	0.601	No	No
4080	68.076	0.426	No	No		96.342	0.628	No	No
4090	50.158	0.389	No	No		43.994	0.661	No	No
4100	35.885	0.385	No	No		45.866	0.642	No	No
4110	33.495	0.385	No	No		69.033	0.575	No	No
4120	36.855	0.396	No	No		60.653	0.574	No	No
4130	42.589	0.399	No	No		50.87	0.533	No	No
4140	36.962	0.403	No	No		46.489	0.623	No	No
4150	46.115	0.389	No	No		75.376	0.587	No	No
4160	62.817	0.466	No	No		75.907	0.608	No	No
4170	54.645	0.394	No	No		46.953	0.605	No	No
4180	41.107	0.474	No	No		78.495	0.546	No	No
4190	80.82	0.465	No	No		59.902	0.622	No	No
4200	62.857	0.539	No	No		70.868	0.548	No	No
4210	39.214	0.551	No	No		49.321	0.525	No	No
4220	65.513	0.465	No	No		61.517	0.561	No	No
4230	58.349	0.412	No	No		60.166	0.574	No	No
4240	81.215	0.589	No	No		68.388	0.653	No	No
4250	87.419	0.59	No	No		42.468	0.63	No	No
4260	66.957	0.514	No	No		40.017	0.602	No	No
4270	78.892	0.476	No	No		53.939	0.568	No	No
4280	67.185	0.586	No	No		69.752	0.624	No	No
4290	90.165	0.531	No	No		77.683	0.558	No	No
4300	43.014	0.413	No	No		78.019	0.576	No	No
4310	59.984	0.469	No	No		51.704	0.585	No	No
4320	27.158	0.38	No	No		78.426	0.602	No	No
4330	64.6	0.409	No	No		86.261	0.715	No	No
4340	79.334	0.444	No	No		79.995	0.665	No	No
4350	14.883	0.321	0.321	14.883		78.141	0.636	No	No
4360	20.071	0.296	0.296	20.071		62.808	0.601	No	No
4370	16.289	0.278	0.278	16.289		71.491	0.631	No	No
4380	5.675	0.291	0.291	5.675		83.11	0.694	No	No
4390	14.91	0.287	0.287	14.91		69.788	0.556	No	No
4400	13.793	0.296	0.296	13.793		59.187	0.567	No	No
4410	41.494	0.367	No	No		74.667	0.575	No	No
4420	35.504	0.386	No	No		83.178	0.601	No	No
4430	11.815	0.326	0.326	11.815		93.1	0.632	No	No
4440	16.467	0.281	0.281	16.467		57.59	0.604	No	No
4450	43.75	0.376	No	No		39.174	0.593	No	No
4460	52.292	0.39	No	No		106.537	0.609	No	No
4470	30.162	0.378	No	No		87.846	0.62	No	No
4480	46.807	0.315	No	No		89.944	0.587	No	No
4490	30.157	0.348	No	No		75.597	0.618	No	No
4500	19.852	0.286	0.286	19.852		69.545	0.715	No	No
4510	54.121	0.356	No	No		76.127	0.754	No	No
4520	65.082	0.488	No	No		84.615	0.639	No	No
4530	60.197	0.437	No	No		95.347	0.627	No	No
4540	57.869	0.401	No	No		78.694	0.581	No	No
4550	12.825	0.289	0.289	12.825		45.821	0.56	No	No
4560	1.748	0.272	0.272	1.748		52.573	0.528	No	No
4570	44.165	0.38	No	No		31.756	0.535	No	No
4580	6.64	0.283	0.283	6.64		50.36	0.606	No	No
4590	54.914	0.439	No	No		112.741	0.658	No	No
4600	53.682	0.392	No	No		76.198	0.613	No	No
4610	19.5	0.277	0.277	19.5		85.034	0.687	No	No
4620	15.348	0.286	0.286	15.348		95.703	0.658	No	No
4630	6.155	0.288	0.288	6.155		90.123	0.711	No	No
4640	6.522	0.287	0.287	6.522		80.361	0.66	No	No
4650	11.013	0.268	0.268	11.013		115.614	0.661	No	No
4660	9.207	0.319	0.319	9.207		89.324	0.665	No	No
4670	56.423	0.373	No	No		98.967	0.672	No	No
4680	11.44	0.282	0.282	11.44		80.333	0.736	No	No
4690	5.86	0.258	0.258	5.86		94.574	0.632	No	No
4700	14.566	0.266	0.266	14.566		101.854	0.679	No	No
4710	59.682	0.468	No	No		64.168	0.636	No	No
4720	30.144	0.445	No	No		50.719	0.629	No	No
4730	30.995	0.423	No	No		59.854	0.648	No	No
4740	44.298	0.369	No	No		88.342	0.597	No	No
4750	36.838	0.396	No	No		98.807	0.571	No	No
4760	35.818	0.434	No	No		87.05	0.659	No	No
4770	10.422	0.281	0.281	10.422		105.032	0.619	No	No
4780	4.39	0.266	0.266	4.39		93.922	0.593	No	No
4790	9.892	0.251	0.251	9.892		86.495	0.638	No	No
4800	11.964	0.265	0.265	11.964		60.559	0.645	No	No
4810	12.597	0.274	0.274	12.597		48.446	0.545	No	No
4820	25.775	0.258	0.258	25.775		66.74	0.61	No	No
4830	11.625	0.272	0.272	11.625		88.378	0.747	No	No
4840	16.849	0.275	0.275	16.849		102.511	0.743	No	No
4850	4.692	0.242	0.242	4.692		76.165	0.626	No	No
4860	11.197	0.275	0.275	11.197		68.073	0.559	No	No
4870	35.19	0.311	No	No		72.887	0.595	No	No
4880	40.649	0.33	No	No		75.884	0.604	No	No
4890	8.798	0.274	0.274	8.798		91.298	0.672	No	No
4900	20.926	0.331	0.331	20.926		91.687	0.671	No	No
4910	19.594	0.3	0.3	19.594		85.913	0.701	No	No
4920	9.773	0.271	0.271	9.773		81.61	0.672	No	No
4930	5.322	0.257	0.257	5.322		79.624	0.66	No	No
4940	31.044	0.308	No	No		96.335	0.628	No	No
4950	41.416	0.415	No	No		72.03	0.63	No	No
4960	33.231	0.403	No	No		82.451	0.737	No	No
4970	41.79	0.408	No	No		77.486	0.707	No	No
4980	16.577	0.28	0.28	16.577		98.075	0.718	No	No
4990	11.14	0.273	0.273	11.14		66.313	0.604	No	No
5000	27.451	0.252	0.252	27.451		92.879	0.673	No	No
5010	70.246	0.447	No	No		68.952	0.571	No	No
5020	3.069	0.263	0.263	3.069		40.309	0.546	No	No
5030	12.45	0.263	0.263	12.45		76.86	0.514	No	No
5040	9.974	0.283	0.283	9.974		57.959	0.692	No	No
5050	20.452	0.383	No	No		84.592	0.659	No	No
5060	14.518	0.3	0.3	14.518		46.458	0.663	No	No
5070	16.435	0.414	No	No		59.205	0.717	No	No
5080	53.159	0.431	No	No		107.196	0.679	No	No
5090	10.176	0.269	0.269	10.176		64.937	0.657	No	No
5100	18.352	0.254	0.254	18.352		62.35	0.651	No	No
5110	27.314	0.328	0.328	27.314		68.812	0.682	No	No
5120	7.941	0.265	0.265	7.941		53.94	0.632	No	No
5130	25.864	0.282	0.282	25.864		73.488	0.609	No	No
5140	11.043	0.265	0.265	11.043		80.694	0.671	No	No
5150	5.239	0.25	0.25	5.239		84.703	0.649	No	No
5160	4.909	0.281	0.281	4.909		79.941	0.601	No	No
5170	7.237	0.265	0.265	7.237		54.324	0.627	No	No
5180	26.909	0.339	0.339	26.909		89.623	0.613	No	No
5190	22.307	0.283	0.283	22.307		78.534	0.559	No	No
5200	11.044	0.262	0.262	11.044		73.425	0.645	No	No
5210	18.098	0.292	0.292	18.098		93.343	0.693	No	No
5220	9.886	0.293	0.293	9.886		59.272	0.607	No	No
5230	9.148	0.3	0.3	9.148		81.437	0.607	No	No
5240	26.861	0.288	0.288	26.861		51.519	0.567	No	No
5250	35.545	0.331	No	No		72.821	0.55	No	No
5260	9.733	0.26	0.26	9.733		54.845	0.582	No	No
5270	6.171	0.278	0.278	6.171		72.929	0.561	No	No
5280	34.252	0.339	No	No		54.135	0.572	No	No
5290	49.287	0.439	No	No		83.937	0.642	No	No
5300	14.003	0.309	0.309	14.003		68.377	0.53	No	No
5310	4.393	0.289	0.289	4.393		56.371	0.569	No	No
5320	18.114	0.277	0.277	18.114		79.85	0.529	No	No
5330	23.89	0.276	0.276	23.89		62.784	0.536	No	No
5340	17.342	0.283	0.283	17.342		34.985	0.498	No	No
5350	29.557	0.311	0.311	29.557		28.625	0.494	No	No
5360	27.521	0.292	0.292	27.521		39.053	0.481	No	No
5370	28.84	0.284	0.284	28.84		52.434	0.456	No	No
5380	6.403	0.265	0.265	6.403		36.887	0.564	No	No
5390	21.256	0.279	0.279	21.256		98.581	0.646	No	No
5400	52.793	0.467	No	No		88.812	0.641	No	No
5410	14.632	0.299	0.299	14.632		85.353	0.589	No	No
5420	14.781	0.294	0.294	14.781		38.303	0.543	No	No
5430	34.853	0.374	No	No		78.596	0.527	No	No
5440	9.684	0.296	0.296	9.684		77.949	0.601	No	No
5450	49.546	0.427	No	No		78.205	0.602	No	No
5460	27.257	0.437	No	No		75.239	0.559	No	No
5470	5.267	0.305	0.305	5.267		54.188	0.577	No	No
5480	10.078	0.272	0.272	10.078		73.208	0.637	No	No
5490	42.127	0.392	No	No		68.065	0.706	No	No
5500	39.625	0.398	No	No		87.271	0.623	No	No
5510	49.249	0.411	No	No		68.958	0.706	No	No
5520	42.93	0.476	No	No		91.577	0.704	No	No
5530	54.87	0.475	No	No		96.886	0.58	No	No
5540	38.726	0.44	No	No		79.494	0.696	No	No
5550	41.347	0.433	No	No		79.643	0.689	No	No
5560	54.098	0.427	No	No		97.488	0.718	No	No
5570	45.153	0.403	No	No		92.601	0.658	No	No
5580	35.63	0.392	No	No		80.608	0.605	No	No
5590	56.822	0.43	No	No		99.156	0.655	No	No
5600	31.763	0.327	No	No		112.037	0.678	No	No
5610	44.97	0.38	No	No		84.345	0.661	No	No
5620	52.86	0.415	No	No		111.154	0.665	No	No
5630	41.2	0.434	No	No		115.519	0.726	No	No
5640	28.043	0.479	No	No		96.172	0.685	No	No
5650	36.49	0.415	No	No		104.068	0.701	No	No
5660	32.24	0.418	No	No		94.306	0.676	No	No
5670	45.208	0.393	No	No		101.698	0.67	No	No
5680	41.086	0.396	No	No		97.132	0.691	No	No
5690	44.877	0.409	No	No		104.216	0.682	No	No
5700	32.314	0.387	No	No		100.563	0.685	No	No
5710	44.992	0.413	No	No		81.037	0.692	No	No
5720	36.541	0.405	No	No		75.939	0.626	No	No
5730	41.22	0.411	No	No		90.858	0.632	No	No
5740	39.978	0.367	No	No		94.304	0.678	No	No
5750	36.324	0.42	No	No		103.44	0.665	No	No
5760	42.749	0.374	No	No		96.03	0.69	No	No
5770	39.333	0.417	No	No		100.678	0.688	No	No
5780	22.157	0.3	0.3	22.157		78.549	0.75	No	No
5790	41.801	0.384	No	No		80.682	0.683	No	No
5800	47.092	0.416	No	No		106.995	0.654	No	No
5810	39.92	0.426	No	No		107.343	0.656	No	No
5820	49.697	0.414	No	No		93.459	0.675	No	No
5830	31.695	0.391	No	No		91.351	0.644	No	No
5840	12.928	0.399	No	No		91.294	0.697	No	No
5850	9.453	0.29	0.29	9.453		65.951	0.694	No	No
5860	3.927	0.283	0.283	3.927		98.344	0.706	No	No
5870	8.205	0.267	0.267	8.205		82.263	0.644	No	No
5880	18.611	0.286	0.286	18.611		99.587	0.718	No	No
5890	11.831	0.277	0.277	11.831		92.674	0.678	No	No
5900	24.893	0.38	No	No		93.148	0.688	No	No
5910	30.769	0.438	No	No		97.111	0.69	No	No
5920	79.613	0.406	No	No		112.129	0.649	No	No
5930	50.293	0.483	No	No		75.601	0.687	No	No
5940	14.656	0.279	0.279	14.656		88.487	0.647	No	No
5950	9.884	0.278	0.278	9.884		86.819	0.707	No	No
5960	9.826	0.27	0.27	9.826		87.039	0.737	No	No
5970	2.248	0.35	0.35	2.248		95.346	0.657	No	No
5980	16.685	0.261	0.261	16.685		83.056	0.644	No	No
5990	2.524	0.275	0.275	2.524		110.41	0.666	No	No
6000	14.369	0.27	0.27	14.369		95.687	0.738	No	No
6010	5.913	0.252	0.252	5.913		107.277	0.781	No	No
6020	17.042	0.262	0.262	17.042		116.868	0.67	No	No
6030	2.176	0.255	0.255	2.176		86.732	0.734	No	No
6040	7.121	0.306	0.306	7.121		114.752	0.701	No	No
6050	18.164	0.276	0.276	18.164		77.764	0.678	No	No
6060	11.06	0.277	0.277	11.06		95.565	0.668	No	No
6070	3.411	0.26	0.26	3.411		83.277	0.686	No	No
6080	23.511	0.272	0.272	23.511		103.449	0.743	No	No
6090	5.281	0.263	0.263	5.281		100.743	0.678	No	No
6100	8.839	0.261	0.261	8.839		93.345	0.692	No	No
6110	13.56	0.264	0.264	13.56		90.407	0.698	No	No
6120	23.101	0.285	0.285	23.101		94.549	0.642	No	No
6130	19.323	0.29	0.29	19.323		95.677	0.662	No	No
6140	6.491	0.288	0.288	6.491		109.931	0.651	No	No
6150	16.524	0.297	0.297	16.524		46.377	0.524	No	No
6160	11.358	0.284	0.284	11.358		54.509	0.541	No	No
6170	20.264	0.275	0.275	20.264		99.095	0.629	No	No
6180	14.561	0.262	0.262	14.561		83.564	0.685	No	No
6190	5.062	0.294	0.294	5.062		82.466	0.657	No	No
6200	29.796	0.267	0.267	29.796		96.294	0.699	No	No
6210	18.907	0.262	0.262	18.907		91.206	0.638	No	No
6220	4.565	0.264	0.264	4.565		104.08	0.668	No	No
6230	11.41	0.269	0.269	11.41		95.661	0.657	No	No
6240	7.985	0.264	0.264	7.985		103.835	0.702	No	No
6250	9.417	0.266	0.266	9.417		84.226	0.619	No	No
6260	41.781	0.298	No	No		88.759	0.684	No	No
6270	5.44	0.294	0.294	5.44		87.625	0.661	No	No
6280	19.019	0.26	0.26	19.019		86.263	0.657	No	No
6290	11.672	0.273	0.273	11.672		87.59	0.655	No	No
6300	18.969	0.281	0.281	18.969		73.126	0.668	No	No
6310	27.03	0.267	0.267	27.03		66.831	0.67	No	No
6320	6.325	0.278	0.278	6.325		65.037	0.601	No	No
6330	16.762	0.284	0.284	16.762		69.144	0.643	No	No
6340	9.757	0.267	0.267	9.757		77.077	0.683	No	No
6350	4.084	0.258	0.258	4.084		60.448	0.691	No	No
6360	15.779	0.286	0.286	15.779		75.466	0.699	No	No
6370	12.235	0.276	0.276	12.235		48.249	0.585	No	No
6380	17.797	0.267	0.267	17.797		97.407	0.622	No	No
6390	9.206	0.256	0.256	9.206		98.052	0.757	No	No
6400	3.358	0.267	0.267	3.358		88.066	0.637	No	No
6410	7.061	0.282	0.282	7.061		109.152	0.68	No	No
6420	12.95	0.258	0.258	12.95		90.68	0.74	No	No
6430	18.471	0.287	0.287	18.471		90.192	0.732	No	No
6440	13.192	0.286	0.286	13.192		79.703	0.653	No	No
6450	17.149	0.267	0.267	17.149		76.835	0.693	No	No
6460	21.584	0.286	0.286	21.584		102.652	0.679	No	No
6470	3.548	0.276	0.276	3.548		73.659	0.726	No	No
6480	27.417	0.28	0.28	27.417		59.755	0.632	No	No
6490	11.502	0.273	0.273	11.502		98.257	0.685	No	No
6500	14.154	0.289	0.289	14.154		103.882	0.727	No	No
6510	12.654	0.259	0.259	12.654		101.283	0.689	No	No
6520	18.205	0.276	0.276	18.205		114.149	0.631	No	No
6530	6.982	0.256	0.256	6.982		96.121	0.708	No	No
6540	6.921	0.269	0.269	6.921		78.082	0.617	No	No
6550	28.719	0.271	0.271	28.719		97.776	0.662	No	No
6560	12.1	0.262	0.262	12.1		80.783	0.689	No	No
6570	16.733	0.271	0.271	16.733		104.272	0.693	No	No
6580	8.048	0.261	0.261	8.048		92.826	0.677	No	No
6590	17.28	0.277	0.277	17.28		83.766	0.691	No	No
6600	21.667	0.28	0.28	21.667		102.078	0.77	No	No
6610	13.021	0.27	0.27	13.021		93.049	0.668	No	No
6620	9.444	0.268	0.268	9.444		82.844	0.696	No	No
6630	16.059	0.267	0.267	16.059		99.214	0.668	No	No
6640	10.062	0.268	0.268	10.062		94.337	0.697	No	No
6650	12.404	0.258	0.258	12.404		90.159	0.744	No	No
6660	7.293	0.291	0.291	7.293		80.86	0.691	No	No
6670	26.231	0.261	0.261	26.231		93.995	0.664	No	No
6680	8.894	0.273	0.273	8.894		97.886	0.691	No	No
6690	5.489	0.278	0.278	5.489		95.225	0.708	No	No
6700	9.634	0.263	0.263	9.634		71.973	0.681	No	No
6710	12.041	0.311	0.311	12.041		88.247	0.638	No	No
6720	16.23	0.266	0.266	16.23		70.496	0.713	No	No
6730	39.655	0.359	No	No		54.502	0.639	No	No
6740	4.626	0.322	0.322	4.626		93.088	0.67	No	No
6750	14.464	0.262	0.262	14.464		69.249	0.637	No	No
6760	15.954	0.257	0.257	15.954		72.172	0.679	No	No
6770	39.376	0.379	No	No		66.623	0.604	No	No
6780	8.344	0.262	0.262	8.344		82.248	0.605	No	No
6790	28.125	0.286	0.286	28.125		71.661	0.666	No	No
6800	8.095	0.286	0.286	8.095		88.468	0.685	No	No
6810	6.794	0.265	0.265	6.794		38.516	0.705	No	No
6820	15.511	0.275	0.275	15.511		46.215	0.675	No	No
6830	11.342	0.301	0.301	11.342		44.137	0.683	No	No
6840	18.296	0.274	0.274	18.296		89.269	0.626	No	No
6850	14.68	0.282	0.282	14.68		61.842	0.658	No	No
6860	10.695	0.264	0.264	10.695		45.626	0.591	No	No
6870	13.392	0.27	0.27	13.392		54.183	0.61	No	No
6880	14.007	0.292	0.292	14.007		78.074	0.636	No	No
6890	20.892	0.279	0.279	20.892		89.601	0.608	No	No
6900	8.674	0.26	0.26	8.674		79.809	0.65	No	No
6910	15.013	0.263	0.263	15.013		81.667	0.617	No	No
6920	36.314	0.284	No	No		26.539	0.612	No	No
6930	10.185	0.277	0.277	10.185		134.756	0.619	No	No
6940	16.837	0.296	0.296	16.837		103.248	0.692	No	No
6950	11.869	0.27	0.27	11.869		42.829	0.681	No	No
6960	8.184	0.274	0.274	8.184		74	0.748	No	No
6970	9.987	0.261	0.261	9.987		92.205	0.714	No	No
6980	10.318	0.258	0.258	10.318		92.254	0.659	No	No
6990	4.284	0.26	0.26	4.284		80.573	0.651	No	No
7000	20.167	0.28	0.28	20.167		95.581	0.629	No	No
7010	24.222	0.288	0.288	24.222		74.08	0.565	No	No
7020	2.79	0.255	0.255	2.79		83.172	0.654	No	No
7030	14.681	0.257	0.257	14.681		76.124	0.541	No	No
7040	15.245	0.266	0.266	15.245		52.397	0.615	No	No
7050	12.544	0.259	0.259	12.544		86.484	0.713	No	No
7060	14.522	0.268	0.268	14.522		63.666	0.554	No	No
7070	3.748	0.257	0.257	3.748		88.762	0.645	No	No
7080	33.426	0.291	No	No		104.322	0.65	No	No
7090	6.113	0.262	0.262	6.113		96.122	0.731	No	No
7100	12.674	0.253	0.253	12.674		87.677	0.692	No	No
7110	6.715	0.267	0.267	6.715		91.46	0.704	No	No
7120	25.66	0.313	0.313	25.66		95.865	0.65	No	No
7130	8.989	0.3	0.3	8.989		84.728	0.69	No	No
7140	16.489	0.294	0.294	16.489		82.279	0.681	No	No
7150	21.291	0.286	0.286	21.291		93.284	0.626	No	No
7160	8.614	0.276	0.276	8.614		88.262	0.655	No	No
7170	6.652	0.26	0.26	6.652		67.629	0.68	No	No
7180	7.779	0.272	0.272	7.779		86.054	0.688	No	No
7190	11.665	0.28	0.28	11.665		74.547	0.692	No	No
7200	8.796	0.288	0.288	8.796		58.658	0.679	No	No
7210	7.989	0.288	0.288	7.989		105.585	0.805	No	No
7220	7.71	0.299	0.299	7.71		85.623	0.714	No	No
7230	22.864	0.277	0.277	22.864		106.031	0.69	No	No
7240	12.743	0.265	0.265	12.743		105.664	0.644	No	No
7250	19.635	0.253	0.253	19.635		80.38	0.654	No	No
7260	9.654	0.266	0.266	9.654		94.109	0.641	No	No
7270	10.664	0.295	0.295	10.664		97.294	0.656	No	No
7280	13.535	0.259	0.259	13.535		89.769	0.638	No	No
7290	15.537	0.264	0.264	15.537		94.808	0.6	No	No
7300	13.802	0.263	0.263	13.802		90.183	0.648	No	No
7310	27.347	0.301	0.301	27.347		104.965	0.649	No	No
7320	14.089	0.258	0.258	14.089		88.486	0.688	No	No
7330	8.266	0.294	0.294	8.266		111.003	0.639	No	No
7340	10.596	0.262	0.262	10.596		102.28	0.68	No	No
7350	3.265	0.268	0.268	3.265		86.444	0.706	No	No
7360	11.923	0.262	0.262	11.923		101.289	0.689	No	No
7370	10.931	0.282	0.282	10.931		102.516	0.688	No	No
7380	11.646	0.256	0.256	11.646		106.459	0.691	No	No
7390	23.788	0.273	0.273	23.788		92.173	0.705	No	No
7400	6.246	0.265	0.265	6.246		52.407	0.667	No	No
7410	5.452	0.266	0.266	5.452		67.825	0.622	No	No
7420	10.701	0.267	0.267	10.701		23.159	0.567	No	No
7430	22.422	0.277	0.277	22.422		105.035	0.785	No	No
7440	7.795	0.262	0.262	7.795		99.42	0.795	No	No
7450	24.243	0.26	0.26	24.243		88.845	0.686	No	No
7460	18.669	0.323	0.323	18.669		108.754	0.688	No	No
7470	20.355	0.308	0.308	20.355		101.736	0.728	No	No
7480	4.587	0.271	0.271	4.587		101.207	0.685	No	No
7490	7.924	0.267	0.267	7.924		119.754	0.665	No	No
7500	2.901	0.266	0.266	2.901		102.081	0.68	No	No
7510	8.531	0.306	0.306	8.531		91.324	0.665	No	No
7520	12.244	0.265	0.265	12.244		91.618	0.722	No	No
7530	22.894	0.272	0.272	22.894		110.818	0.678	No	No
7540	8.727	0.265	0.265	8.727		106.644	0.713	No	No
7550	13.37	0.268	0.268	13.37		89.949	0.675	No	No
7560	7.525	0.258	0.258	7.525		105.975	0.671	No	No
7570	11.501	0.295	0.295	11.501		85.796	0.713	No	No
7580	11.354	0.281	0.281	11.354		93.478	0.694	No	No
7590	19.991	0.266	0.266	19.991		85.576	0.694	No	No
7600	10.736	0.251	0.251	10.736		92.139	0.709	No	No
7610	7.872	0.28	0.28	7.872		93.407	0.677	No	No
7620	10.396	0.279	0.279	10.396		86.64	0.67	No	No
7630	0.964	0.26	0.26	0.964		85.034	0.649	No	No
7640	13.035	0.263	0.263	13.035		61.901	0.613	No	No
7650	6.918	0.271	0.271	6.918		82.924	0.569	No	No
7660	7.607	0.27	0.27	7.607		102.147	0.685	No	No
7670	8.006	0.248	0.248	8.006		97.22	0.677	No	No
7680	19.801	0.302	0.302	19.801		78.702	0.702	No	No
7690	6.802	0.265	0.265	6.802		96.667	0.684	No	No
7700	11.111	0.266	0.266	11.111		103.106	0.643	No	No
7710	15.138	0.281	0.281	15.138		73.235	0.635	No	No
7720	18.028	0.278	0.278	18.028		101.965	0.675	No	No
7730	8.612	0.289	0.289	8.612		83.794	0.563	No	No
7740	21.802	0.269	0.269	21.802		57.571	0.635	No	No
7750	9.958	0.274	0.274	9.958		71.192	0.663	No	No
7760	8.782	0.256	0.256	8.782		43.869	0.566	No	No
7770	9.558	0.256	0.256	9.558		43.063	0.463	No	No
7780	18.204	0.268	0.268	18.204		31.333	0.532	No	No
7790	8.853	0.276	0.276	8.853		41.045	0.481	No	No
7800	14.874	0.273	0.273	14.874		30.711	0.46	No	No
7810	10.786	0.263	0.263	10.786		93.223	0.564	No	No
7820	10.318	0.253	0.253	10.318		80.434	0.559	No	No
7830	8.47	0.257	0.257	8.47		34.612	0.492	No	No
7840	20.996	0.274	0.274	20.996		45.053	0.514	No	No
7850	6.667	0.282	0.282	6.667		38.562	0.466	No	No
7860	12.716	0.267	0.267	12.716		25.377	0.49	No	No
7870	16.537	0.267	0.267	16.537		45.863	0.498	No	No
7880	19.396	0.264	0.264	19.396		22.985	0.519	No	No
7890	5.175	0.261	0.261	5.175		38.042	0.466	No	No
7900	11.518	0.286	0.286	11.518		32.087	0.513	No	No
7910	12.261	0.282	0.282	12.261		37.827	0.489	No	No
7920	18.587	0.268	0.268	18.587		77.609	0.561	No	No
7930	10.666	0.271	0.271	10.666		54.338	0.471	No	No
7940	5.413	0.261	0.261	5.413		39.878	0.462	No	No
7950	5.164	0.273	0.273	5.164		44.443	0.446	No	No
7960	5.873	0.275	0.275	5.873		38.978	0.481	No	No
7970	18.013	0.293	0.293	18.013		40.785	0.424	No	No
7980	37.37	0.353	No	No		40.668	0.437	No	No
7990	1.7	0.277	0.277	1.7		28.919	0.505	No	No
8000	18.123	0.312	0.312	18.123		32.624	0.454	No	No
8010	11.139	0.271	0.271	11.139		47.199	0.538	No	No
8020	6.51	0.256	0.256	6.51		40.068	0.495	No	No
8030	31.923	0.303	No	No		44.087	0.521	No	No
8040	4.817	0.255	0.255	4.817		51.949	0.585	No	No
8050	7.899	0.283	0.283	7.899		25.473	0.498	No	No
8060	10.138	0.264	0.264	10.138		32.173	0.476	No	No
8070	20.27	0.298	0.298	20.27		45.273	0.484	No	No
8080	7.603	0.264	0.264	7.603		31.709	0.521	No	No
8090	10.283	0.278	0.278	10.283		42.225	0.543	No	No
8100	10.807	0.268	0.268	10.807		64.537	0.6	No	No
8110	9.862	0.266	0.266	9.862		68.625	0.533	No	No
8120	10.37	0.257	0.257	10.37		90.316	0.665	No	No
8130	10.686	0.276	0.276	10.686		88.7	0.654	No	No
8140	10.333	0.265	0.265	10.333		34.252	0.633	No	No
8150	17.155	0.279	0.279	17.155		53.491	0.685	No	No
8160	15.738	0.272	0.272	15.738		35.765	0.674	No	No
8170	19.583	0.34	0.34	19.583		61.188	0.561	No	No
8180	9.802	0.26	0.26	9.802		78.645	0.65	No	No
8190	10.381	0.269	0.269	10.381		92.631	0.7	No	No
8200	10.834	0.267	0.267	10.834		73.423	0.583	No	No
8210	13.776	0.267	0.267	13.776		47.871	0.517	No	No
8220	17.946	0.262	0.262	17.946		30.678	0.468	No	No
8230	15.784	0.264	0.264	15.784		62.737	0.607	No	No
8240	3.533	0.272	0.272	3.533		85.728	0.626	No	No
8250	18.092	0.271	0.271	18.092		61.959	0.601	No	No
8260	8.921	0.263	0.263	8.921		69.199	0.572	No	No
8270	22.774	0.255	0.255	22.774		85.956	0.567	No	No
8280	16.351	0.268	0.268	16.351		82.906	0.608	No	No
8290	11.556	0.28	0.28	11.556		82.482	0.56	No	No
8300	14.346	0.301	0.301	14.346		45.374	0.625	No	No
8310	15.559	0.261	0.261	15.559		68.793	0.579	No	No
8320	15.596	0.26	0.26	15.596		87.324	0.545	No	No
8330	11.741	0.256	0.256	11.741		87.013	0.557	No	No
8340	11.449	0.282	0.282	11.449		65.323	0.626	No	No
8350	27.745	0.286	0.286	27.745		86.383	0.564	No	No
8360	18.417	0.262	0.262	18.417		80.287	0.583	No	No
8370	8.547	0.257	0.257	8.547		48.422	0.57	No	No
8380	20.089	0.285	0.285	20.089		57.674	0.578	No	No
8390	4.875	0.263	0.263	4.875		31.801	0.659	No	No
8400	15.382	0.258	0.258	15.382		40.869	0.617	No	No
8410	9.336	0.257	0.257	9.336		53.21	0.493	No	No
8420	76.665	0.417	No	No		64.221	0.572	No	No
8430	9.656	0.254	0.254	9.656		62.595	0.531	No	No
8440	10.03	0.274	0.274	10.03		44.066	0.66	No	No
8450	5.599	0.257	0.257	5.599		56.389	0.626	No	No
8460	15.786	0.289	0.289	15.786		79.178	0.645	No	No
8470	15.173	0.273	0.273	15.173		30.032	0.579	No	No
8480	21.295	0.259	0.259	21.295		51.953	0.624	No	No
8490	8.945	0.271	0.271	8.945		77.063	0.592	No	No
8500	11.744	0.265	0.265	11.744		92.817	0.53	No	No
8510	18.904	0.278	0.278	18.904		25.122	0.52	No	No
8520	8.325	0.265	0.265	8.325		34.654	0.521	No	No
8530	22.097	0.272	0.272	22.097		31.902	0.463	No	No
8540	8.542	0.294	0.294	8.542		45.596	0.517	No	No
8550	19.722	0.283	0.283	19.722		48.098	0.564	No	No
8560	13.062	0.257	0.257	13.062		72.158	0.609	No	No
8570	8.693	0.27	0.27	8.693		66.62	0.529	No	No
8580	9.563	0.251	0.251	9.563		60.327	0.561	No	No
8590	33.893	0.277	No	No		69.192	0.536	No	No
8600	9.193	0.337	0.337	9.193		26.576	0.546	No	No
8610	31.359	0.286	No	No		33.945	0.469	No	No
8620	7.222	0.283	0.283	7.222		49.424	0.574	No	No
8630	14.952	0.297	0.297	14.952		73.479	0.57	No	No
8640	14.158	0.273	0.273	14.158		30.017	0.534	No	No
8650	16.642	0.277	0.277	16.642		39.884	0.513	No	No
8660	8.472	0.256	0.256	8.472		43.434	0.489	No	No
8670	12.708	0.279	0.279	12.708		29.846	0.418	No	No
8680	15.521	0.27	0.27	15.521		29.376	0.502	No	No
8690	12.198	0.267	0.267	12.198		31.593	0.465	No	No
8700	6.301	0.265	0.265	6.301		45.11	0.521	No	No
8710	4.751	0.276	0.276	4.751		43.011	0.556	No	No
8720	11.233	0.252	0.252	11.233		33.872	0.52	No	No
8730	3.827	0.263	0.263	3.827		35.781	0.481	No	No
8740	5.828	0.288	0.288	5.828		24.07	0.501	No	No
8750	30.62	0.28	No	No		36.451	0.481	No	No
8760	2.414	0.26	0.26	2.414		43.956	0.509	No	No
8770	10.459	0.28	0.28	10.459		39.151	0.48	No	No
8780	5.961	0.27	0.27	5.961		26.543	0.518	No	No
8790	9.825	0.274	0.274	9.825		36.895	0.482	No	No
8800	6.316	0.255	0.255	6.316		23.599	0.486	No	No
8810	9.268	0.262	0.262	9.268		34.838	0.523	No	No
8820	13.774	0.293	0.293	13.774		20.564	0.495	No	No
8830	30.093	0.325	No	No		33.33	0.503	No	No
8840	21.721	0.305	0.305	21.721		44.192	0.534	No	No
8850	8.021	0.274	0.274	8.021		59.21	0.467	No	No
8860	10.565	0.297	0.297	10.565		46.043	0.495	No	No
8870	13.644	0.318	0.318	13.644		38.936	0.487	No	No
8880	14.371	0.27	0.27	14.371		29.906	0.516	No	No
8890	16.059	0.293	0.293	16.059		67.34	0.633	No	No
8900	4.562	0.273	0.273	4.562		65.522	0.53	No	No
8910	14.287	0.278	0.278	14.287		42.879	0.526	No	No
8920	60.143	0.412	No	No		31.167	0.494	No	No
8930	18.545	0.419	No	No		36.552	0.533	No	No
8940	10.232	0.264	0.264	10.232		37.314	0.468	No	No
8950	10.205	0.266	0.266	10.205		43.345	0.487	No	No
8960	39.988	0.401	No	No		31.201	0.537	No	No
8970	31.455	0.362	No	No		34.548	0.444	No	No
8980	38.767	0.451	No	No		38.546	0.474	No	No
8990	16.234	0.277	0.277	16.234		29.596	0.458	No	No
9000	2.473	0.289	0.289	2.473		40.839	0.525	No	No
9010	12.949	0.275	0.275	12.949		42.195	0.464	No	No
9020	18.563	0.275	0.275	18.563		33.572	0.383	No	No
9030	16.239	0.278	0.278	16.239		51.575	0.444	No	No
9040	13.027	0.275	0.275	13.027		33.683	0.368	No	No
9050	12.649	0.266	0.266	12.649		26.025	0.414	No	No
9060	14.228	0.265	0.265	14.228		37.911	0.476	No	No
9070	4.574	0.268	0.268	4.574		28.49	0.446	No	No
9080	16.662	0.263	0.263	16.662		45.475	0.379	No	No
9090	24.684	0.291	0.291	24.684		39.798	0.45	No	No
9100	20.983	0.287	0.287	20.983		35.954	0.372	No	No
9110	11.879	0.269	0.269	11.879		49.882	0.411	No	No
9120	5.82	0.275	0.275	5.82		64.332	0.414	No	No
9130	40.622	0.367	No	No		43.206	0.467	No	No
9140	13.711	0.251	0.251	13.711		37.344	0.347	No	No
9150	30.235	0.388	No	No		8.795	0.291	0.291	8.795
9160	5.689	0.258	0.258	5.689		9.759	0.278	0.278	9.759
9170	19.961	0.337	0.337	19.961		13.825	0.276	0.276	13.825
9180	3.196	0.257	0.257	3.196		3.421	0.284	0.284	3.421
9190	3.803	0.286	0.286	3.803		5.827	0.265	0.265	5.827
9200	5.201	0.268	0.268	5.201		4.193	0.265	0.265	4.193
9210	18.167	0.278	0.278	18.167		8.478	0.271	0.271	8.478
9220	16.975	0.274	0.274	16.975		8.348	0.268	0.268	8.348
9230	9.824	0.274	0.274	9.824		13.345	0.279	0.279	13.345
9240	7.872	0.273	0.273	7.872		11.003	0.257	0.257	11.003
9250	19.677	0.284	0.284	19.677		14.869	0.282	0.282	14.869
9260	19.4	0.259	0.259	19.4		11.414	0.271	0.271	11.414
9270	8.271	0.269	0.269	8.271		15.073	0.323	0.323	15.073
9280	23.869	0.297	0.297	23.869		19.034	0.298	0.298	19.034
9290	10.367	0.273	0.273	10.367		10.25	0.259	0.259	10.25
9300	16.095	0.286	0.286	16.095		16.121	0.302	0.302	16.121
9310	8.244	0.26	0.26	8.244		15.696	0.283	0.283	15.696
9320	21.214	0.286	0.286	21.214		5.555	0.295	0.295	5.555
9330	9.136	0.254	0.254	9.136		5.778	0.286	0.286	5.778
9340	20.921	0.281	0.281	20.921		18.831	0.274	0.274	18.831
9350	4.749	0.267	0.267	4.749		13.837	0.26	0.26	13.837
9360	20.917	0.284	0.284	20.917		7.648	0.295	0.295	7.648
9370	11.928	0.253	0.253	11.928		33.549	0.297	No	No
9380	11.584	0.337	0.337	11.584		64.027	0.435	No	No
9390	8.809	0.28	0.28	8.809		33.583	0.422	No	No
9400	15.908	0.256	0.256	15.908		59.702	0.441	No	No
9410	6.46	0.266	0.266	6.46		38.158	0.431	No	No
9420	6.422	0.298	0.298	6.422		13.383	0.31	0.31	13.383
9430	14.985	0.246	0.246	14.985		52.011	0.43	No	No
9440	6.341	0.293	0.293	6.341		10.975	0.262	0.262	10.975
9450	13.008	0.264	0.264	13.008		13.167	0.277	0.277	13.167
9460	9.924	0.278	0.278	9.924		2.209	0.324	0.324	2.209
9470	18.37	0.274	0.274	18.37		12.577	0.248	0.248	12.577
9480	21.901	0.299	0.299	21.901		12.634	0.267	0.267	12.634
9490	2.203	0.308	0.308	2.203		7.423	0.274	0.274	7.423
9500	24.041	0.268	0.268	24.041		8.036	0.262	0.262	8.036
9510	22.76	0.268	0.268	22.76		8.054	0.27	0.27	8.054
9520	15.871	0.276	0.276	15.871		4.669	0.263	0.263	4.669
9530	9.272	0.278	0.278	9.272		2.361	0.265	0.265	2.361
9540	10.235	0.253	0.253	10.235		15.945	0.298	0.298	15.945
9550	19.492	0.265	0.265	19.492		38.177	0.372	No	No
9560	2.119	0.267	0.267	2.119		22.415	0.288	0.288	22.415
9570	8.825	0.275	0.275	8.825		15.623	0.269	0.269	15.623
9580	27.604	0.273	0.273	27.604		7.956	0.28	0.28	7.956
9590	17.654	0.299	0.299	17.654		15.804	0.264	0.264	15.804
9600	7.243	0.258	0.258	7.243		18.019	0.258	0.258	18.019
9610	14.421	0.286	0.286	14.421		14.698	0.286	0.286	14.698
9620	10.073	0.27	0.27	10.073		5.704	0.28	0.28	5.704
9630	28.667	0.261	0.261	28.667		8.875	0.286	0.286	8.875
9640	11.359	0.252	0.252	11.359		28.826	0.368	No	No
9650	19.476	0.265	0.265	19.476		6.955	0.269	0.269	6.955
9660	16.612	0.254	0.254	16.612		12.826	0.263	0.263	12.826
9670	22.441	0.351	No	No		3.734	0.272	0.272	3.734
9680	22.291	0.262	0.262	22.291		6.549	0.29	0.29	6.549
9690	14.562	0.276	0.276	14.562		11.82	0.283	0.283	11.82
9700	15.852	0.274	0.274	15.852		7.935	0.302	0.302	7.935
9710	9.641	0.282	0.282	9.641		7.474	0.297	0.297	7.474
9720	27.669	0.289	0.289	27.669		6.914	0.277	0.277	6.914
9730	11.083	0.269	0.269	11.083		7.433	0.272	0.272	7.433
9740	9.733	0.274	0.274	9.733		16.963	0.269	0.269	16.963
9750	13.509	0.281	0.281	13.509		10.358	0.258	0.258	10.358
9760	11.779	0.301	0.301	11.779		20.128	0.284	0.284	20.128
9770	5.376	0.266	0.266	5.376		13.29	0.286	0.286	13.29
9780	50.365	0.423	No	No		15.785	0.292	0.292	15.785
9790	38.953	0.362	No	No		26.893	0.297	0.297	26.893
9800	24.02	0.277	0.277	24.02		12.845	0.327	0.327	12.845
9810	19.08	0.264	0.264	19.08		8.208	0.274	0.274	8.208
9820	20.617	0.27	0.27	20.617		11.151	0.28	0.28	11.151
9830	11.302	0.255	0.255	11.302		21.259	0.287	0.287	21.259
9840	3.492	0.254	0.254	3.492		9.076	0.304	0.304	9.076
9850	14.111	0.274	0.274	14.111		11.245	0.257	0.257	11.245
9860	7.32	0.267	0.267	7.32		3.926	0.284	0.284	3.926
9870	8.943	0.268	0.268	8.943		53.008	0.465	No	No
9880	15.321	0.264	0.264	15.321		54.16	0.428	No	No
9890	18.194	0.293	0.293	18.194		39.805	0.477	No	No
9900	6.248	0.262	0.262	6.248		54.441	0.436	No	No
9910	11.49	0.275	0.275	11.49		51.956	0.448	No	No
9920	10.642	0.268	0.268	10.642		37.244	0.411	No	No
9930	6.742	0.277	0.277	6.742		8.477	0.298	0.298	8.477
9940	14.246	0.279	0.279	14.246		32.882	0.359	No	No
9950	9.288	0.266	0.266	9.288		44.433	0.434	No	No
9960	3.509	0.276	0.276	3.509		0.995	0.268	0.268	0.995
9970	21.579	0.274	0.274	21.579		42.386	0.438	No	No
9980	11.672	0.274	0.274	11.672		32.194	0.463	No	No
9990	5.416	0.278	0.278	5.416		38.484	0.409	No	No
10000	5.728	0.259	0.259	5.728		30.964	0.444	No	No
10010	12.887	0.27	0.27	12.887		26.78	0.446	No	No
10020	17.938	0.277	0.277	17.938		38.089	0.449	No	No
10030	9.826	0.284	0.284	9.826		51.764	0.393	No	No
10040	9.747	0.293	0.293	9.747		19.113	0.327	0.327	19.113
10050	28.011	0.265	0.265	28.011		47.357	0.433	No	No
10060	20.725	0.272	0.272	20.725		11.973	0.278	0.278	11.973
10070	10.43	0.26	0.26	10.43		20.481	0.341	0.341	20.481
10080	13.482	0.274	0.274	13.482		42.205	0.375	No	No
10090	10.222	0.273	0.273	10.222		40.662	0.465	No	No
10100	19.084	0.268	0.268	19.084		46.25	0.458	No	No
10110	6.388	0.262	0.262	6.388		11.271	0.265	0.265	11.271
10120	5.937	0.263	0.263	5.937		18.1	0.277	0.277	18.1
10130	12.963	0.271	0.271	12.963		8.298	0.269	0.269	8.298
10140	6.801	0.261	0.261	6.801		18.979	0.3	0.3	18.979
10150	16.723	0.28	0.28	16.723		33.238	0.271	No	No
10160	13.531	0.286	0.286	13.531		13.665	0.272	0.272	13.665
10170	14.247	0.287	0.287	14.247		11.833	0.269	0.269	11.833
10180	4.822	0.251	0.251	4.822		12.343	0.274	0.274	12.343
10190	10.062	0.298	0.298	10.062		4.956	0.281	0.281	4.956
10200	10.771	0.262	0.262	10.771		23.097	0.354	No	No
10210	8.755	0.261	0.261	8.755		34.111	0.272	No	No
10220	8.881	0.298	0.298	8.881		9.4	0.265	0.265	9.4
10230	20.236	0.286	0.286	20.236		11.877	0.254	0.254	11.877
10240	11.392	0.269	0.269	11.392		10.775	0.273	0.273	10.775
10250	16.535	0.281	0.281	16.535		16.95	0.332	0.332	16.95
10260	2.573	0.263	0.263	2.573		25.709	0.296	0.296	25.709
10270	18.391	0.276	0.276	18.391		8.889	0.288	0.288	8.889
10280	3.627	0.274	0.274	3.627		15.626	0.253	0.253	15.626
10290	1.725	0.278	0.278	1.725		11.7	0.277	0.277	11.7
10300	13.243	0.284	0.284	13.243		8.651	0.293	0.293	8.651
10310	10.871	0.268	0.268	10.871		16.808	0.291	0.291	16.808
10320	12.749	0.294	0.294	12.749		32.671	0.399	No	No
10330	15.719	0.267	0.267	15.719		40.66	0.396	No	No
10340	6.224	0.262	0.262	6.224		3.796	0.272	0.272	3.796
10350	24.481	0.265	0.265	24.481		12.064	0.274	0.274	12.064
10360	15.691	0.253	0.253	15.691		25.037	0.272	0.272	25.037
10370	16.307	0.281	0.281	16.307		14.61	0.266	0.266	14.61
10380	8.103	0.269	0.269	8.103		10.122	0.27	0.27	10.122
10390	4.828	0.259	0.259	4.828		8.668	0.277	0.277	8.668
10400	12.643	0.258	0.258	12.643		15.249	0.282	0.282	15.249
10410	11.3	0.283	0.283	11.3		17.252	0.278	0.278	17.252
10420	25.102	0.264	0.264	25.102		21.933	0.258	0.258	21.933
10430	8.566	0.295	0.295	8.566		32.845	0.375	No	No
10440	22.468	0.263	0.263	22.468		25.612	0.275	0.275	25.612
10450	14.604	0.271	0.271	14.604		6.252	0.266	0.266	6.252
10460	24.137	0.265	0.265	24.137		14.62	0.307	0.307	14.62
10470	4.473	0.272	0.272	4.473		3.199	0.283	0.283	3.199
10480	7.494	0.272	0.272	7.494		15.983	0.271	0.271	15.983
10490	10.516	0.294	0.294	10.516		3.768	0.261	0.261	3.768
10500	15.848	0.254	0.254	15.848		11.019	0.27	0.27	11.019
10510	21.25	0.258	0.258	21.25		12.703	0.308	0.308	12.703
10520	11.037	0.265	0.265	11.037		8.156	0.284	0.284	8.156
10530	6.126	0.273	0.273	6.126		42.896	0.393	No	No
10540	8.903	0.29	0.29	8.903		8.38	0.257	0.257	8.38
10550	25.634	0.268	0.268	25.634		14.399	0.277	0.277	14.399
10560	12.224	0.298	0.298	12.224		7.536	0.261	0.261	7.536
10570	8.73	0.263	0.263	8.73		2.875	0.274	0.274	2.875
10580	18.583	0.272	0.272	18.583		27.685	0.305	0.305	27.685
10590	11.448	0.271	0.271	11.448		36.115	0.368	No	No
10600	17.968	0.263	0.263	17.968		6.498	0.255	0.255	6.498
10610	29.747	0.265	0.265	29.747		21.657	0.265	0.265	21.657
10620	14.677	0.356	No	No		2.643	0.275	0.275	2.643
10630	29.494	0.271	0.271	29.494		14.217	0.26	0.26	14.217
10640	7.452	0.268	0.268	7.452		16.253	0.318	0.318	16.253
10650	13.89	0.264	0.264	13.89		14.596	0.252	0.252	14.596
10660	10.595	0.263	0.263	10.595		13.434	0.258	0.258	13.434
10670	10.205	0.274	0.274	10.205		15.584	0.305	0.305	15.584
10680	12.946	0.253	0.253	12.946		12.566	0.262	0.262	12.566
10690	19.567	0.269	0.269	19.567		13.294	0.29	0.29	13.294
10700	6.076	0.277	0.277	6.076		19.029	0.261	0.261	19.029
10710	11.447	0.26	0.26	11.447		23.449	0.272	0.272	23.449
10720	2.706	0.278	0.278	2.706		10.7	0.276	0.276	10.7
10730	9.752	0.272	0.272	9.752		12.886	0.263	0.263	12.886
10740	21.212	0.27	0.27	21.212		18.92	0.286	0.286	18.92
10750	7.985	0.272	0.272	7.985		2.843	0.262	0.262	2.843
10760	13.658	0.266	0.266	13.658		26.853	0.269	0.269	26.853
10770	6.332	0.262	0.262	6.332		17.071	0.271	0.271	17.071
10780	1.453	0.27	0.27	1.453		10.682	0.266	0.266	10.682
10790	20.17	0.261	0.261	20.17		15.93	0.265	0.265	15.93
10800	16.174	0.255	0.255	16.174		15.607	0.287	0.287	15.607
10810	9.159	0.266	0.266	9.159		5.758	0.252	0.252	5.758
10820	8.097	0.26	0.26	8.097		10.326	0.273	0.273	10.326
10830	4.67	0.282	0.282	4.67		10.492	0.299	0.299	10.492
10840	42.203	0.276	No	No		11.781	0.264	0.264	11.781
10850	11.968	0.27	0.27	11.968		11.436	0.271	0.271	11.436
10860	5.916	0.251	0.251	5.916		14.565	0.261	0.261	14.565
10870	8.234	0.247	0.247	8.234		9.499	0.269	0.269	9.499
10880	1.508	0.265	0.265	1.508		11.296	0.26	0.26	11.296
10890	13.764	0.264	0.264	13.764		13.192	0.278	0.278	13.192
10900	7.302	0.268	0.268	7.302		15.463	0.264	0.264	15.463
10910	21.082	0.269	0.269	21.082		17.393	0.268	0.268	17.393
10920	18.159	0.303	0.303	18.159		11.954	0.273	0.273	11.954
10930	10.372	0.269	0.269	10.372		5.751	0.287	0.287	5.751
10940	4.743	0.278	0.278	4.743		0.767	0.268	0.268	0.767
10950	27.423	0.308	0.308	27.423		15.075	0.276	0.276	15.075
10960	22.013	0.28	0.28	22.013		23.34	0.262	0.262	23.34
10970	23.82	0.307	0.307	23.82		9.303	0.261	0.261	9.303
10980	12.979	0.258	0.258	12.979		9.651	0.272	0.272	9.651
10990	13.398	0.27	0.27	13.398		5.636	0.269	0.269	5.636
11000	33.208	0.29	No	No		11.624	0.256	0.256	11.624
11010	15.318	0.262	0.262	15.318		25.793	0.338	0.338	25.793
11020	10.289	0.27	0.27	10.289		10.345	0.267	0.267	10.345
11030	12.345	0.28	0.28	12.345		9.62	0.255	0.255	9.62
11040	9.422	0.259	0.259	9.422		13.371	0.266	0.266	13.371
11050	21.057	0.259	0.259	21.057		13.716	0.295	0.295	13.716
11060	22.776	0.282	0.282	22.776		26.465	0.285	0.285	26.465
11070	16.722	0.267	0.267	16.722		2.69	0.271	0.271	2.69
11080	13.132	0.254	0.254	13.132		14.075	0.273	0.273	14.075
11090	15.895	0.273	0.273	15.895		21.804	0.294	0.294	21.804
11100	15.157	0.267	0.267	15.157		10.983	0.261	0.261	10.983
11110	9.042	0.276	0.276	9.042		8.231	0.25	0.25	8.231
11120	5.342	0.285	0.285	5.342		14.063	0.253	0.253	14.063
11130	11.08	0.265	0.265	11.08		14.257	0.255	0.255	14.257
11140	9.883	0.264	0.264	9.883		18.94	0.279	0.279	18.94
11150	15.924	0.287	0.287	15.924		18.096	0.261	0.261	18.096
11160	19.466	0.278	0.278	19.466		17.639	0.292	0.292	17.639
11170	10.738	0.273	0.273	10.738		15.567	0.257	0.257	15.567
11180	10.012	0.266	0.266	10.012		22.24	0.255	0.255	22.24
11190	72.08	0.328	No	No		9.181	0.282	0.282	9.181
11200	17.178	0.285	0.285	17.178		5.9	0.28	0.28	5.9
11210	19.782	0.265	0.265	19.782		14.609	0.245	0.245	14.609
11220	14.779	0.259	0.259	14.779		4.652	0.27	0.27	4.652
11230	35.934	0.269	No	No		11.641	0.25	0.25	11.641
11240	15.676	0.269	0.269	15.676		5.557	0.288	0.288	5.557
11250	6.872	0.268	0.268	6.872		10.148	0.276	0.276	10.148
11260	1.982	0.273	0.273	1.982		6.231	0.27	0.27	6.231
11270	5.597	0.287	0.287	5.597		7.43	0.269	0.269	7.43
11280	3.598	0.254	0.254	3.598		6.015	0.266	0.266	6.015
11290	5.465	0.279	0.279	5.465		14.777	0.264	0.264	14.777
11300	16	0.286	0.286	16		15.183	0.264	0.264	15.183
11310	8.936	0.281	0.281	8.936		9.531	0.274	0.274	9.531
11320	13.966	0.324	0.324	13.966		12.029	0.269	0.269	12.029
11330	7.727	0.262	0.262	7.727		4.687	0.271	0.271	4.687
11340	16.666	0.288	0.288	16.666		8.357	0.267	0.267	8.357
11350	8.64	0.26	0.26	8.64		5.124	0.274	0.274	5.124
11360	26.117	0.316	0.316	26.117		20.824	0.291	0.291	20.824
11370	4.929	0.26	0.26	4.929		6.774	0.272	0.272	6.774
11380	13.614	0.271	0.271	13.614		38.012	0.366	No	No
11390	19.991	0.283	0.283	19.991		6.883	0.269	0.269	6.883
11400	5.365	0.258	0.258	5.365		12.801	0.274	0.274	12.801
11410	22.88	0.267	0.267	22.88		12.124	0.263	0.263	12.124
11420	15.765	0.261	0.261	15.765		54.982	0.391	No	No
11430	6.1	0.272	0.272	6.1		4.988	0.285	0.285	4.988
11440	23.919	0.261	0.261	23.919		21.948	0.277	0.277	21.948
11450	48.887	0.349	No	No		11.755	0.262	0.262	11.755
11460	14.585	0.255	0.255	14.585		28.867	0.264	0.264	28.867
11470	11.765	0.282	0.282	11.765		14.229	0.271	0.271	14.229
11480	23.566	0.264	0.264	23.566		12.195	0.283	0.283	12.195
11490	14.832	0.268	0.268	14.832		4.026	0.273	0.273	4.026
11500	8.161	0.265	0.265	8.161		6.145	0.269	0.269	6.145
11510	5.195	0.265	0.265	5.195		18.866	0.266	0.266	18.866
11520	8.095	0.282	0.282	8.095		33.327	0.288	No	No
11530	3.31	0.27	0.27	3.31		13.336	0.274	0.274	13.336
11540	21.628	0.289	0.289	21.628		23.673	0.294	0.294	23.673
11550	14.897	0.265	0.265	14.897		3.94	0.277	0.277	3.94
11560	14.877	0.261	0.261	14.877		23.921	0.295	0.295	23.921
11570	13.108	0.27	0.27	13.108		10.861	0.264	0.264	10.861
11580	21.142	0.261	0.261	21.142		23.577	0.261	0.261	23.577
11590	13.734	0.278	0.278	13.734		21.43	0.299	0.299	21.43
11600	8.084	0.259	0.259	8.084		4.48	0.272	0.272	4.48
11610	13.055	0.256	0.256	13.055		13.188	0.289	0.289	13.188
11620	4.601	0.262	0.262	4.601		10.414	0.275	0.275	10.414
11630	19.596	0.299	0.299	19.596		3.874	0.262	0.262	3.874
11640	10.992	0.271	0.271	10.992		11.161	0.254	0.254	11.161
11650	12.692	0.271	0.271	12.692		11.479	0.292	0.292	11.479
11660	18.983	0.295	0.295	18.983		14.975	0.268	0.268	14.975
11670	26.224	0.296	0.296	26.224		14.881	0.328	0.328	14.881
11680	8.557	0.274	0.274	8.557		13.736	0.258	0.258	13.736
11690	9.623	0.334	0.334	9.623		12.192	0.277	0.277	12.192
11700	20.885	0.281	0.281	20.885		16.735	0.307	0.307	16.735
11710	39.551	0.372	No	No		10.304	0.282	0.282	10.304
11720	49.913	0.408	No	No		16.852	0.256	0.256	16.852
11730	25.366	0.36	No	No		9.044	0.267	0.267	9.044
11740	15.869	0.26	0.26	15.869		19.692	0.27	0.27	19.692
11750	6.874	0.254	0.254	6.874		7.978	0.252	0.252	7.978
11760	2.403	0.27	0.27	2.403		5.681	0.288	0.288	5.681
11770	16.793	0.247	0.247	16.793		10.395	0.275	0.275	10.395
11780	4.873	0.268	0.268	4.873		12.808	0.286	0.286	12.808
11790	5.768	0.257	0.257	5.768		25.196	0.286	0.286	25.196
11800	18.112	0.292	0.292	18.112		6.256	0.264	0.264	6.256
11810	18.677	0.249	0.249	18.677		3.037	0.265	0.265	3.037
11820	12.896	0.286	0.286	12.896		11.133	0.269	0.269	11.133
11830	7.32	0.263	0.263	7.32		1.455	0.275	0.275	1.455
11840	11.849	0.277	0.277	11.849		6.751	0.259	0.259	6.751
11850	32.083	0.278	No	No		17.464	0.258	0.258	17.464
11860	18.221	0.274	0.274	18.221		7.753	0.268	0.268	7.753
11870	14.091	0.267	0.267	14.091		3.233	0.273	0.273	3.233
11880	13.516	0.289	0.289	13.516		10.394	0.288	0.288	10.394
11890	6.64	0.27	0.27	6.64		12.197	0.269	0.269	12.197
11900	8.543	0.268	0.268	8.543		2.212	0.295	0.295	2.212
11910	14.437	0.263	0.263	14.437		39.327	0.366	No	No
11920	5.734	0.291	0.291	5.734		10.673	0.282	0.282	10.673
11930	20.479	0.268	0.268	20.479		15.606	0.262	0.262	15.606
11940	14.189	0.272	0.272	14.189		5.858	0.26	0.26	5.858
11950	9.114	0.274	0.274	9.114		21.587	0.271	0.271	21.587
11960	0.873	0.267	0.267	0.873		13.321	0.269	0.269	13.321
11970	3.951	0.276	0.276	3.951		5.726	0.279	0.279	5.726
11980	13.351	0.258	0.258	13.351		5.021	0.264	0.264	5.021
11990	15.632	0.254	0.254	15.632		13.187	0.278	0.278	13.187
12000	16.162	0.255	0.255	16.162		17.609	0.268	0.268	17.609
12010	3.138	0.262	0.262	3.138		11.936	0.272	0.272	11.936
12020	10.965	0.271	0.271	10.965		17.035	0.264	0.264	17.035
12030	14.761	0.295	0.295	14.761		16.03	0.281	0.281	16.03
12040	10.868	0.265	0.265	10.868		6.159	0.29	0.29	6.159
12050	8.396	0.259	0.259	8.396		9.896	0.265	0.265	9.896
12060	31.499	0.273	No	No		18.766	0.277	0.277	18.766
12070	11.429	0.276	0.276	11.429		13.12	0.247	0.247	13.12
12080	10.081	0.26	0.26	10.081		11.717	0.266	0.266	11.717
12090	11.621	0.282	0.282	11.621		10.567	0.26	0.26	10.567
12100	7.871	0.259	0.259	7.871		11.324	0.265	0.265	11.324
12110	15.74	0.262	0.262	15.74		5.338	0.261	0.261	5.338
12120	21.207	0.273	0.273	21.207		17.145	0.282	0.282	17.145
12130	26.24	0.267	0.267	26.24		10.595	0.264	0.264	10.595
12140	16.799	0.252	0.252	16.799		13.231	0.255	0.255	13.231
12150	12.106	0.26	0.26	12.106		21.683	0.265	0.265	21.683
12160	21.269	0.257	0.257	21.269		4.919	0.254	0.254	4.919
12170	22.139	0.29	0.29	22.139		20.613	0.273	0.273	20.613
12180	8.49	0.266	0.266	8.49		9.89	0.264	0.264	9.89
12190	19.613	0.28	0.28	19.613		4.779	0.296	0.296	4.779
12200	9.482	0.272	0.272	9.482		6.293	0.269	0.269	6.293
12210	9.662	0.256	0.256	9.662		13.844	0.281	0.281	13.844
12220	13.328	0.282	0.282	13.328		5.759	0.259	0.259	5.759
12230	18.338	0.269	0.269	18.338		1.525	0.273	0.273	1.525
12240	14.571	0.275	0.275	14.571		5.039	0.273	0.273	5.039
12250	13.904	0.26	0.26	13.904		32.044	0.386	No	No
12260	11.269	0.281	0.281	11.269		35.97	0.343	No	No
12270	20.605	0.266	0.266	20.605		47.58	0.394	No	No
12280	18.488	0.289	0.289	18.488		42.801	0.455	No	No
12290	23.069	0.283	0.283	23.069		33.777	0.423	No	No
12300	10.018	0.3	0.3	10.018		10.359	0.279	0.279	10.359
12310	14.906	0.271	0.271	14.906		15.656	0.273	0.273	15.656
12320	3.235	0.263	0.263	3.235		6.729	0.271	0.271	6.729
12330	10.025	0.262	0.262	10.025		19.041	0.264	0.264	19.041
12340	16.029	0.265	0.265	16.029		11.624	0.255	0.255	11.624
12350	9.994	0.26	0.26	9.994		6.601	0.271	0.271	6.601
12360	22.263	0.311	0.311	22.263		15.441	0.263	0.263	15.441
12370	18.617	0.272	0.272	18.617		3.606	0.29	0.29	3.606
12380	16.047	0.27	0.27	16.047		7.398	0.256	0.256	7.398
12390	10.578	0.26	0.26	10.578		20.444	0.285	0.285	20.444
12400	13.12	0.288	0.288	13.12		5.753	0.283	0.283	5.753
12410	19.661	0.266	0.266	19.661		12.76	0.28	0.28	12.76
12420	12.466	0.275	0.275	12.466		13.541	0.301	0.301	13.541
12430	9.337	0.25	0.25	9.337		12.922	0.291	0.291	12.922
12440	11.506	0.258	0.258	11.506		4.328	0.257	0.257	4.328
12450	14.255	0.264	0.264	14.255		6.453	0.268	0.268	6.453
12460	4.548	0.257	0.257	4.548		5.126	0.28	0.28	5.126
12470	11.991	0.27	0.27	11.991		15.658	0.283	0.283	15.658
12480	4.561	0.263	0.263	4.561		10.281	0.284	0.284	10.281
12490	7.193	0.263	0.263	7.193		8.619	0.268	0.268	8.619
12500	3.802	0.28	0.28	3.802		0.878	0.267	0.267	0.878
12510	8.01	0.273	0.273	8.01		26.568	0.279	0.279	26.568
12520	11.864	0.255	0.255	11.864		10.239	0.302	0.302	10.239
12530	9.203	0.258	0.258	9.203		12.222	0.275	0.275	12.222
12540	19.039	0.254	0.254	19.039		6.678	0.304	0.304	6.678
12550	11.705	0.284	0.284	11.705		18.26	0.262	0.262	18.26
12560	5.917	0.296	0.296	5.917		10.302	0.272	0.272	10.302
12570	10.774	0.263	0.263	10.774		13.947	0.312	0.312	13.947
12580	9.248	0.26	0.26	9.248		8.177	0.261	0.261	8.177
12590	6.249	0.25	0.25	6.249		7.352	0.287	0.287	7.352
12600	24.927	0.289	0.289	24.927		15.227	0.312	0.312	15.227
12610	12.698	0.287	0.287	12.698		39.997	0.388	No	No
12620	6.173	0.276	0.276	6.173		41.466	0.379	No	No
12630	10.238	0.271	0.271	10.238		7.864	0.266	0.266	7.864
12640	16.765	0.261	0.261	16.765		32.238	0.357	No	No
12650	8.624	0.254	0.254	8.624		33.984	0.361	No	No
12660	8.604	0.257	0.257	8.604		49.114	0.38	No	No
12670	12.48	0.263	0.263	12.48		8.979	0.282	0.282	8.979
12680	8.514	0.288	0.288	8.514		8.63	0.277	0.277	8.63
12690	9.669	0.261	0.261	9.669		6.645	0.29	0.29	6.645
12700	8.391	0.253	0.253	8.391		29.199	0.32	0.32	29.199
12710	5.799	0.274	0.274	5.799		52.906	0.352	No	No
12720	11.298	0.26	0.26	11.298		12.447	0.266	0.266	12.447
12730	9.795	0.272	0.272	9.795		5.762	0.28	0.28	5.762
12740	9.032	0.269	0.269	9.032		10.315	0.27	0.27	10.315
12750	20.04	0.269	0.269	20.04		17.615	0.268	0.268	17.615
12760	10.786	0.256	0.256	10.786		10.017	0.261	0.261	10.017
12770	8.177	0.274	0.274	8.177		12.085	0.264	0.264	12.085
12780	15.518	0.265	0.265	15.518		9.598	0.293	0.293	9.598
12790	11.4	0.259	0.259	11.4		8.656	0.258	0.258	8.656
12800	10.471	0.266	0.266	10.471		14.635	0.27	0.27	14.635
12810	10.216	0.272	0.272	10.216		13.3	0.278	0.278	13.3
12820	4.124	0.271	0.271	4.124		10.813	0.267	0.267	10.813
12830	19.988	0.271	0.271	19.988		2.184	0.26	0.26	2.184
12840	4.885	0.255	0.255	4.885		19.22	0.262	0.262	19.22
12850	19.146	0.26	0.26	19.146		11.429	0.276	0.276	11.429
12860	5.922	0.271	0.271	5.922		11.996	0.275	0.275	11.996
12870	11.046	0.259	0.259	11.046		8.172	0.273	0.273	8.172
12880	8.138	0.263	0.263	8.138		8.033	0.282	0.282	8.033
12890	11.322	0.254	0.254	11.322		16.274	0.272	0.272	16.274
12900	7.908	0.257	0.257	7.908		14.153	0.268	0.268	14.153
12910	13.623	0.259	0.259	13.623		10.212	0.286	0.286	10.212
12920	15.648	0.265	0.265	15.648		12.426	0.303	0.303	12.426
12930	7.513	0.267	0.267	7.513		17.225	0.282	0.282	17.225
12940	21.025	0.287	0.287	21.025		14.844	0.275	0.275	14.844
12950	19.465	0.279	0.279	19.465		19.881	0.284	0.284	19.881
12960	3.926	0.273	0.273	3.926		17.7	0.316	0.316	17.7
12970	3.512	0.287	0.287	3.512		13.102	0.271	0.271	13.102
12980	6.145	0.272	0.272	6.145		10.336	0.287	0.287	10.336
12990	6.726	0.269	0.269	6.726		13.633	0.301	0.301	13.633
13000	20.17	0.261	0.261	20.17		15.573	0.276	0.276	15.573
13010	10.683	0.263	0.263	10.683		29.983	0.303	0.303	29.983
13020	15.059	0.249	0.249	15.059		4.878	0.263	0.263	4.878
13030	2.461	0.257	0.257	2.461		14.131	0.281	0.281	14.131
13040	11.653	0.29	0.29	11.653		8.224	0.283	0.283	8.224
13050	4.46	0.261	0.261	4.46		11.027	0.28	0.28	11.027
13060	27.579	0.307	0.307	27.579		16.044	0.302	0.302	16.044
13070	25.139	0.287	0.287	25.139		6.634	0.271	0.271	6.634
13080	0.959	0.268	0.268	0.959		32.527	0.388	No	No
13090	4.381	0.257	0.257	4.381		7.279	0.273	0.273	7.279
13100	14.419	0.265	0.265	14.419		5.598	0.256	0.256	5.598
13110	7.398	0.27	0.27	7.398		13.846	0.272	0.272	13.846
13120	19.534	0.266	0.266	19.534		10.883	0.272	0.272	10.883
13130	7.262	0.267	0.267	7.262		44.918	0.423	No	No
13140	10.721	0.262	0.262	10.721		27.336	0.462	No	No
13150	17.635	0.272	0.272	17.635		42.83	0.44	No	No
13160	11.876	0.286	0.286	11.876		13.159	0.268	0.268	13.159
13170	6.526	0.281	0.281	6.526		2.079	0.316	0.316	2.079
13180	4.3	0.273	0.273	4.3		11.88	0.283	0.283	11.88
13190	12.639	0.273	0.273	12.639		37.122	0.407	No	No
13200	11.658	0.278	0.278	11.658		48.432	0.419	No	No
13210	14.095	0.279	0.279	14.095		60.934	0.418	No	No
13220	10.729	0.269	0.269	10.729		30.208	0.408	No	No
13230	2.931	0.274	0.274	2.931		29.401	0.363	No	No
13240	2.793	0.302	0.302	2.793		18.275	0.402	No	No
13250	11.81	0.278	0.278	11.81		46.799	0.424	No	No
13260	19.556	0.265	0.265	19.556		43.104	0.463	No	No
13270	23.198	0.279	0.279	23.198		67.329	0.459	No	No
13280	25.612	0.308	0.308	25.612		34.083	0.48	No	No
13290	11.611	0.282	0.282	11.611		54.507	0.451	No	No
13300	36.157	0.28	No	No		33.038	0.369	No	No
13310	8.294	0.261	0.261	8.294		33.543	0.417	No	No
13320	11.163	0.278	0.278	11.163		40.181	0.395	No	No
13330	13.494	0.298	0.298	13.494		42.347	0.407	No	No
13340	22.246	0.276	0.276	22.246		43.514	0.391	No	No
13350	5.735	0.267	0.267	5.735		30.845	0.423	No	No
13360	6.09	0.276	0.276	6.09		26.448	0.434	No	No
13370	19.325	0.269	0.269	19.325		49.039	0.391	No	No
13380	25.675	0.288	0.288	25.675		41.311	0.464	No	No
13390	8.761	0.257	0.257	8.761		21.854	0.266	0.266	21.854
13400	7.524	0.265	0.265	7.524		12.493	0.3	0.3	12.493
13410	11.392	0.271	0.271	11.392		16.033	0.263	0.263	16.033
13420	11.165	0.273	0.273	11.165		12.398	0.278	0.278	12.398
13430	15.728	0.278	0.278	15.728		9.331	0.264	0.264	9.331
13440	17.13	0.272	0.272	17.13		20.415	0.276	0.276	20.415
13450	16.986	0.28	0.28	16.986		14.774	0.266	0.266	14.774
13460	18.239	0.289	0.289	18.239		1.254	0.273	0.273	1.254
13470	13.899	0.27	0.27	13.899		3.46	0.273	0.273	3.46
13480	4.047	0.266	0.266	4.047		11.72	0.347	0.347	11.72
13490	12.568	0.277	0.277	12.568		38.428	0.388	No	No
13500	9.864	0.275	0.275	9.864		31.674	0.393	No	No
13510	41.28	0.266	No	No		17.188	0.264	0.264	17.188
13520	15.884	0.269	0.269	15.884		15.853	0.256	0.256	15.853
13530	24.12	0.292	0.292	24.12		4.163	0.27	0.27	4.163
13540	17.64	0.281	0.281	17.64		3.32	0.259	0.259	3.32
13550	13.262	0.275	0.275	13.262		18.487	0.259	0.259	18.487
13560	12.876	0.275	0.275	12.876		10.529	0.266	0.266	10.529
13570	7.937	0.282	0.282	7.937		16.08	0.287	0.287	16.08
13580	14.665	0.26	0.26	14.665		17.209	0.259	0.259	17.209
13590	17.408	0.27	0.27	17.408		11.879	0.266	0.266	11.879
13600	14.528	0.266	0.266	14.528		16.408	0.251	0.251	16.408
13610	6.634	0.258	0.258	6.634		18.158	0.255	0.255	18.158
13620	14.501	0.254	0.254	14.501		15.991	0.271	0.271	15.991
13630	15.203	0.257	0.257	15.203		25.156	0.282	0.282	25.156
13640	19.243	0.267	0.267	19.243		9.449	0.25	0.25	9.449
13650	8.773	0.326	0.326	8.773		17.34	0.273	0.273	17.34
13660	7.243	0.26	0.26	7.243		13.451	0.252	0.252	13.451
13670	4.253	0.255	0.255	4.253		17.074	0.28	0.28	17.074
13680	5.94	0.3	0.3	5.94		32.681	0.296	No	No
13690	4.594	0.273	0.273	4.594		3.643	0.289	0.289	3.643
13700	19.942	0.267	0.267	19.942		8.427	0.259	0.259	8.427
13710	9.474	0.276	0.276	9.474		26.971	0.274	0.274	26.971
13720	11.765	0.288	0.288	11.765		13.276	0.256	0.256	13.276
13730	22.327	0.263	0.263	22.327		15.068	0.283	0.283	15.068
13740	34.493	0.299	No	No		21.899	0.26	0.26	21.899
13750	10.84	0.285	0.285	10.84		23.384	0.272	0.272	23.384
13760	20.021	0.272	0.272	20.021		11.537	0.275	0.275	11.537
13770	7.37	0.269	0.269	7.37		6.703	0.268	0.268	6.703
13780	18.683	0.34	0.34	18.683		7.586	0.31	0.31	7.586
13790	14.377	0.3	0.3	14.377		13.576	0.254	0.254	13.576
13800	5.122	0.258	0.258	5.122		32.33	0.288	No	No
13810	17.715	0.255	0.255	17.715		20.224	0.261	0.261	20.224
13820	5.887	0.264	0.264	5.887		14.295	0.259	0.259	14.295
13830	18.227	0.285	0.285	18.227		9.356	0.286	0.286	9.356
13840	19.449	0.264	0.264	19.449		12.65	0.304	0.304	12.65
13850	17.124	0.302	0.302	17.124		4.672	0.261	0.261	4.672
13860	10.215	0.269	0.269	10.215		19.473	0.272	0.272	19.473
13870	22.643	0.266	0.266	22.643		18.5	0.265	0.265	18.5
13880	13.845	0.28	0.28	13.845		12.809	0.257	0.257	12.809
13890	2.016	0.262	0.262	2.016		9.661	0.265	0.265	9.661
13900	4.975	0.296	0.296	4.975		23.423	0.353	No	No
13910	6.236	0.264	0.264	6.236		51.926	0.378	No	No
13920	36.152	0.336	No	No		25.54	0.335	0.335	25.54
13930	9.389	0.261	0.261	9.389		49.474	0.425	No	No
13940	7.878	0.271	0.271	7.878		40.636	0.395	No	No
13950	20.09	0.269	0.269	20.09		41.845	0.416	No	No
13960	21.902	0.275	0.275	21.902		29.657	0.411	No	No
13970	10.172	0.261	0.261	10.172		23.35	0.32	0.32	23.35
13980	9.991	0.277	0.277	9.991		25.508	0.47	No	No
13990	17.965	0.279	0.279	17.965		38.504	0.47	No	No
14000	19.979	0.258	0.258	19.979		40.863	0.454	No	No
14010	4.674	0.275	0.275	4.674		47.909	0.464	No	No
14020	7.107	0.276	0.276	7.107		54.161	0.509	No	No
14030	9.793	0.266	0.266	9.793		27.664	0.379	No	No
14040	6.923	0.266	0.266	6.923		42.175	0.449	No	No
14050	8.946	0.266	0.266	8.946		49.982	0.44	No	No
14060	36.305	0.301	No	No		40.899	0.429	No	No
14070	12.713	0.274	0.274	12.713		34.356	0.43	No	No
14080	10.115	0.257	0.257	10.115		47.237	0.409	No	No
14090	38.091	0.291	No	No		49.041	0.455	No	No
14100	8.866	0.269	0.269	8.866		32.553	0.465	No	No
14110	17.835	0.275	0.275	17.835		44.989	0.428	No	No
14120	4.3	0.264	0.264	4.3		48.048	0.358	No	No
14130	6.314	0.292	0.292	6.314		48.767	0.424	No	No
14140	10.47	0.264	0.264	10.47		45.898	0.45	No	No
14150	16.498	0.274	0.274	16.498		44.475	0.433	No	No
14160	14.207	0.267	0.267	14.207		53.173	0.519	No	No
14170	19.084	0.271	0.271	19.084		43.121	0.473	No	No
14180	28.719	0.276	0.276	28.719		43.107	0.498	No	No
14190	16.313	0.273	0.273	16.313		40.806	0.405	No	No
14200	6.296	0.26	0.26	6.296		44.323	0.376	No	No
14210	15.618	0.253	0.253	15.618		48.26	0.411	No	No
14220	9.419	0.279	0.279	9.419		40.67	0.408	No	No
14230	5.305	0.253	0.253	5.305		39.108	0.447	No	No
14240	4.925	0.286	0.286	4.925		38.515	0.447	No	No
14250	16.44	0.259	0.259	16.44		29.093	0.455	No	No
14260	3.413	0.262	0.262	3.413		50.461	0.469	No	No
14270	4.985	0.252	0.252	4.985		43.626	0.407	No	No
14280	12.245	0.289	0.289	12.245		38.732	0.405	No	No
14290	10.368	0.25	0.25	10.368		34.58	0.537	No	No
14300	16.316	0.27	0.27	16.316		39.585	0.465	No	No
14310	3.77	0.26	0.26	3.77		37.938	0.356	No	No
14320	9.677	0.274	0.274	9.677		41.094	0.389	No	No
14330	5.155	0.267	0.267	5.155		27.736	0.393	No	No
14340	22.149	0.288	0.288	22.149		10.705	0.362	No	No
14350	19.21	0.283	0.283	19.21		14.513	0.29	0.29	14.513
14360	9.901	0.245	0.245	9.901		18.476	0.258	0.258	18.476
14370	13.725	0.273	0.273	13.725		12.221	0.271	0.271	12.221
14380	8.184	0.253	0.253	8.184		14.369	0.274	0.274	14.369
14390	14.324	0.28	0.28	14.324		19.276	0.297	0.297	19.276
14400	6.516	0.264	0.264	6.516		47.208	0.369	No	No
14410	5.337	0.263	0.263	5.337		9.326	0.256	0.256	9.326
14420	11.65	0.274	0.274	11.65		10.45	0.26	0.26	10.45
14430	15.737	0.262	0.262	15.737		17.961	0.317	0.317	17.961
14440	25.131	0.284	0.284	25.131		4.186	0.266	0.266	4.186
14450	12.491	0.262	0.262	12.491		6.023	0.288	0.288	6.023
14460	15.567	0.264	0.264	15.567		15.867	0.277	0.277	15.867
14470	9.93	0.264	0.264	9.93		19.467	0.264	0.264	19.467
14480	8.759	0.264	0.264	8.759		44.719	0.426	No	No
14490	3.375	0.271	0.271	3.375		16.748	0.277	0.277	16.748
14500	12.194	0.264	0.264	12.194		14.24	0.268	0.268	14.24
14510	9.304	0.274	0.274	9.304		14.663	0.282	0.282	14.663
14520	7.351	0.273	0.273	7.351		4.884	0.273	0.273	4.884
14530	9.865	0.275	0.275	9.865		3.613	0.287	0.287	3.613
14540	3.583	0.268	0.268	3.583		11.527	0.285	0.285	11.527
14550	8.213	0.263	0.263	8.213		12.098	0.28	0.28	12.098
14560	10.392	0.264	0.264	10.392		8.473	0.255	0.255	8.473
14570	8.249	0.253	0.253	8.249		13.472	0.27	0.27	13.472
14580	3.822	0.317	0.317	3.822		4.723	0.271	0.271	4.723
14590	10.086	0.261	0.261	10.086		17.754	0.253	0.253	17.754
14600	8.279	0.274	0.274	8.279		4.486	0.257	0.257	4.486
14610	33.065	0.304	No	No		14.935	0.268	0.268	14.935
14620	2.912	0.261	0.261	2.912		34.572	0.259	No	No
14630	15.786	0.248	0.248	15.786		7.399	0.281	0.281	7.399
14640	10.2	0.262	0.262	10.2		21.329	0.257	0.257	21.329
14650	23.542	0.28	0.28	23.542		7.897	0.265	0.265	7.897
14660	38.382	0.294	No	No		15.054	0.274	0.274	15.054
14670	9.553	0.3	0.3	9.553		9.645	0.286	0.286	9.645
14680	13.319	0.282	0.282	13.319		10.492	0.255	0.255	10.492
14690	2.862	0.258	0.258	2.862		11.248	0.265	0.265	11.248
14700	5.738	0.257	0.257	5.738		6.241	0.262	0.262	6.241
14710	11.283	0.271	0.271	11.283		11.558	0.262	0.262	11.558
14720	16.11	0.27	0.27	16.11		14.513	0.278	0.278	14.513
14730	16.052	0.269	0.269	16.052		3.871	0.285	0.285	3.871
14740	12.63	0.267	0.267	12.63		3.432	0.266	0.266	3.432
14750	8.988	0.294	0.294	8.988		21.004	0.309	0.309	21.004
14760	6.806	0.253	0.253	6.806		12.917	0.303	0.303	12.917
14770	6.815	0.252	0.252	6.815		9.489	0.277	0.277	9.489
14780	39.268	0.283	No	No		21.195	0.283	0.283	21.195
14790	5.913	0.254	0.254	5.913		15.593	0.296	0.296	15.593
14800	13.351	0.256	0.256	13.351		17.953	0.258	0.258	17.953
14810	13.098	0.271	0.271	13.098		11.783	0.298	0.298	11.783
14820	9.341	0.275	0.275	9.341		26.086	0.303	0.303	26.086
14830	7.418	0.264	0.264	7.418		20.879	0.314	0.314	20.879
14840	16.021	0.272	0.272	16.021		11.38	0.259	0.259	11.38
14850	2.946	0.27	0.27	2.946		7.416	0.268	0.268	7.416
14860	8.703	0.255	0.255	8.703		29.11	0.27	0.27	29.11
14870	20.15	0.259	0.259	20.15		14.661	0.289	0.289	14.661
14880	15.322	0.25	0.25	15.322		14.545	0.263	0.263	14.545
14890	16.455	0.274	0.274	16.455		7.894	0.262	0.262	7.894
14900	2.394	0.261	0.261	2.394		43.926	0.356	No	No
14910	8.295	0.274	0.274	8.295		53.726	0.426	No	No
14920	10.029	0.268	0.268	10.029		50.974	0.418	No	No
14930	30.768	0.297	No	No		11.038	0.265	0.265	11.038
14940	15.265	0.301	0.301	15.265		9.044	0.27	0.27	9.044
14950	11.435	0.289	0.289	11.435		12.534	0.283	0.283	12.534
14960	6.505	0.283	0.283	6.505		9.651	0.269	0.269	9.651
14970	18.707	0.304	0.304	18.707		24.694	0.277	0.277	24.694
14980	7.715	0.273	0.273	7.715		2.309	0.258	0.258	2.309
14990	12.824	0.265	0.265	12.824		7.126	0.254	0.254	7.126
15000	18.187	0.282	0.282	18.187		17.229	0.27	0.27	17.229
15010	26.086	0.253	0.253	26.086		4.758	0.302	0.302	4.758
15020	8.264	0.252	0.252	8.264		12.247	0.273	0.273	12.247
15030	5.998	0.261	0.261	5.998		6.458	0.264	0.264	6.458
15040	27.031	0.285	0.285	27.031		14.533	0.299	0.299	14.533
15050	21.69	0.305	0.305	21.69		10.238	0.272	0.272	10.238
15060	20.337	0.285	0.285	20.337		8.693	0.288	0.288	8.693
15070	15.656	0.267	0.267	15.656		5.992	0.263	0.263	5.992
15080	9.374	0.277	0.277	9.374		21.746	0.267	0.267	21.746
15090	12.789	0.257	0.257	12.789		12.088	0.257	0.257	12.088
15100	10.577	0.273	0.273	10.577		18.229	0.278	0.278	18.229
15110	9.226	0.264	0.264	9.226		6.755	0.257	0.257	6.755
15120	11.102	0.292	0.292	11.102		4.795	0.262	0.262	4.795
15130	8.33	0.264	0.264	8.33		8.307	0.256	0.256	8.307
15140	17.315	0.266	0.266	17.315		12.618	0.258	0.258	12.618
15150	16.411	0.249	0.249	16.411		10.918	0.263	0.263	10.918
15160	19.487	0.266	0.266	19.487		6.938	0.279	0.279	6.938
15170	6.108	0.279	0.279	6.108		14.846	0.282	0.282	14.846
15180	13.524	0.268	0.268	13.524		7.683	0.26	0.26	7.683
15190	10.233	0.295	0.295	10.233		23.138	0.271	0.271	23.138
15200	10.79	0.261	0.261	10.79		8.749	0.28	0.28	8.749
15210	21.567	0.263	0.263	21.567		9.633	0.264	0.264	9.633
15220	4.724	0.297	0.297	4.724		3.853	0.261	0.261	3.853
15230	16.248	0.267	0.267	16.248		9.857	0.282	0.282	9.857
15240	9.857	0.269	0.269	9.857		6.33	0.271	0.271	6.33
15250	13.971	0.288	0.288	13.971		19.131	0.272	0.272	19.131
15260	18.859	0.295	0.295	18.859		3.545	0.321	0.321	3.545
15270	19.754	0.259	0.259	19.754		6.533	0.266	0.266	6.533
15280	23.724	0.271	0.271	23.724		7.956	0.309	0.309	7.956
15290	9.458	0.262	0.262	9.458		6.531	0.253	0.253	6.531
15300	8.998	0.252	0.252	8.998		14.205	0.259	0.259	14.205
15310	8.567	0.262	0.262	8.567		4.941	0.263	0.263	4.941
15320	7.092	0.291	0.291	7.092		9.487	0.278	0.278	9.487
15330	14.469	0.271	0.271	14.469		5.43	0.253	0.253	5.43
15340	12.245	0.279	0.279	12.245		7.947	0.267	0.267	7.947
15350	13.466	0.268	0.268	13.466		11.231	0.276	0.276	11.231
15360	3.636	0.27	0.27	3.636		6.943	0.254	0.254	6.943
15370	30.561	0.272	No	No		5.653	0.274	0.274	5.653
15380	14.989	0.262	0.262	14.989		12.236	0.285	0.285	12.236
15390	14.625	0.277	0.277	14.625		12.507	0.27	0.27	12.507
15400	1.987	0.263	0.263	1.987		20.979	0.256	0.256	20.979
15410	6.921	0.271	0.271	6.921		15.691	0.302	0.302	15.691
15420	7.605	0.258	0.258	7.605		14.759	0.318	0.318	14.759
15430	5.385	0.265	0.265	5.385		9.029	0.253	0.253	9.029
15440	24.015	0.257	0.257	24.015		11.518	0.268	0.268	11.518
15450	12.2	0.254	0.254	12.2		6.536	0.295	0.295	6.536
15460	14.385	0.262	0.262	14.385		16.812	0.263	0.263	16.812
15470	20.66	0.258	0.258	20.66		3.258	0.294	0.294	3.258
15480	17.518	0.278	0.278	17.518		16.909	0.268	0.268	16.909
15490	10.395	0.267	0.267	10.395		10.341	0.274	0.274	10.341
15500	21.428	0.274	0.274	21.428		18.445	0.306	0.306	18.445
15510	9.851	0.26	0.26	9.851		6.452	0.272	0.272	6.452
15520	6.823	0.274	0.274	6.823		6.216	0.256	0.256	6.216
15530	5.685	0.273	0.273	5.685		10.425	0.252	0.252	10.425
15540	11.173	0.275	0.275	11.173		12.724	0.315	0.315	12.724
15550	18.231	0.252	0.252	18.231		19.2	0.268	0.268	19.2
15560	10.172	0.248	0.248	10.172		14.544	0.26	0.26	14.544
15570	18.08	0.293	0.293	18.08		13.118	0.281	0.281	13.118
15580	13.165	0.269	0.269	13.165		15.451	0.263	0.263	15.451
15590	17.776	0.263	0.263	17.776		51.575	0.408	No	No
15600	21.456	0.28	0.28	21.456		45.266	0.428	No	No
15610	23.439	0.28	0.28	23.439		22.375	0.268	0.268	22.375
15620	11.912	0.271	0.271	11.912		14.262	0.267	0.267	14.262
15630	4.775	0.273	0.273	4.775		27.488	0.399	No	No
15640	8.311	0.246	0.246	8.311		45.915	0.434	No	No
15650	7.294	0.277	0.277	7.294		43.906	0.501	No	No
15660	17.843	0.268	0.268	17.843		31.412	0.403	No	No
15670	16.083	0.259	0.259	16.083		41.385	0.465	No	No
15680	8.297	0.283	0.283	8.297		29.983	0.432	No	No
15690	18.731	0.26	0.26	18.731		37.223	0.444	No	No
15700	19.638	0.254	0.254	19.638		39.725	0.489	No	No
15710	16.139	0.271	0.271	16.139		43.043	0.472	No	No
15720	11.036	0.286	0.286	11.036		39.295	0.478	No	No
15730	15.16	0.259	0.259	15.16		63.693	0.492	No	No
15740	8.398	0.269	0.269	8.398		33.147	0.48	No	No
15750	10.78	0.276	0.276	10.78		26.549	0.428	No	No
15760	6.471	0.297	0.297	6.471		41.078	0.453	No	No
15770	11.375	0.277	0.277	11.375		37.805	0.532	No	No
15780	10.083	0.267	0.267	10.083		34.046	0.477	No	No
15790	18.351	0.296	0.296	18.351		49.791	0.486	No	No
15800	6.268	0.273	0.273	6.268		17.448	0.487	No	No
15810	7.786	0.281	0.281	7.786		25.54	0.549	No	No
15820	9.493	0.277	0.277	9.493		23.566	0.453	No	No
15830	12.515	0.267	0.267	12.515		29.526	0.529	No	No
15840	7.243	0.271	0.271	7.243		47.206	0.521	No	No
15850	16.601	0.263	0.263	16.601		33.488	0.51	No	No
15860	3.593	0.254	0.254	3.593		49.302	0.529	No	No
15870	21.382	0.268	0.268	21.382		25.77	0.509	No	No
15880	18.542	0.28	0.28	18.542		35.902	0.504	No	No
15890	11.198	0.25	0.25	11.198		30.529	0.461	No	No
15900	6.99	0.297	0.297	6.99		49.921	0.476	No	No
15910	15.271	0.27	0.27	15.271		29.378	0.475	No	No
15920	15.021	0.293	0.293	15.021		29.696	0.464	No	No
15930	9.807	0.267	0.267	9.807		35.471	0.472	No	No
15940	21.29	0.261	0.261	21.29		43.039	0.457	No	No
15950	23.879	0.289	0.289	23.879		24.074	0.5	No	No
15960	9.926	0.257	0.257	9.926		35.159	0.467	No	No
15970	5.936	0.266	0.266	5.936		22.623	0.53	No	No
15980	17.313	0.266	0.266	17.313		38.423	0.497	No	No
15990	21.899	0.292	0.292	21.899		41.492	0.514	No	No
16000	12.185	0.276	0.276	12.185		39.637	0.483	No	No
16010	4.779	0.269	0.269	4.779		36.807	0.499	No	No
16020	10.766	0.282	0.282	10.766		33.383	0.499	No	No
16030	16.465	0.261	0.261	16.465		26.81	0.483	No	No
16040	14.979	0.267	0.267	14.979		38.889	0.475	No	No
16050	12.25	0.259	0.259	12.25		39.794	0.505	No	No
16060	1.678	0.258	0.258	1.678		35.495	0.542	No	No
16070	15.925	0.272	0.272	15.925		37.464	0.512	No	No
16080	16.211	0.266	0.266	16.211		52.208	0.49	No	No
16090	14.075	0.281	0.281	14.075		46.925	0.452	No	No
16100	20.6	0.262	0.262	20.6		43.396	0.479	No	No
16110	14.214	0.265	0.265	14.214		34.503	0.468	No	No
16120	18.476	0.276	0.276	18.476		50.344	0.449	No	No
16130	12.783	0.308	0.308	12.783		45.446	0.505	No	No
16140	18.738	0.265	0.265	18.738		41.177	0.453	No	No
16150	20.874	0.248	0.248	20.874		39.755	0.491	No	No
16160	1.539	0.268	0.268	1.539		47.041	0.413	No	No
16170	5.233	0.282	0.282	5.233		53.187	0.491	No	No
16180	6.461	0.282	0.282	6.461		33.894	0.447	No	No
16190	30.646	0.349	No	No		34.355	0.468	No	No
16200	29.618	0.347	0.347	29.618		31.424	0.48	No	No
16210	39.278	0.32	No	No		37.119	0.516	No	No
16220	44.131	0.345	No	No		35.278	0.44	No	No
16230	13.093	0.274	0.274	13.093		30.435	0.46	No	No
16240	19.457	0.262	0.262	19.457		40.864	0.488	No	No
16250	12.631	0.258	0.258	12.631		36.936	0.503	No	No
16260	12.968	0.26	0.26	12.968		32.02	0.483	No	No
16270	14.97	0.267	0.267	14.97		22.366	0.501	No	No
16280	13.214	0.277	0.277	13.214		35.062	0.508	No	No
16290	7.125	0.263	0.263	7.125		24.517	0.499	No	No
16300	9.692	0.298	0.298	9.692		40.9	0.456	No	No
16310	4.457	0.282	0.282	4.457		53.043	0.476	No	No
16320	25.362	0.302	0.302	25.362		49.426	0.458	No	No
16330	14.629	0.29	0.29	14.629		39.86	0.488	No	No
16340	14.502	0.288	0.288	14.502		32.773	0.526	No	No
16350	12.374	0.275	0.275	12.374		38.542	0.442	No	No
16360	9.629	0.286	0.286	9.629		21.904	0.457	No	No
16370	17.647	0.253	0.253	17.647		22.232	0.466	No	No
16380	6.797	0.276	0.276	6.797		43.617	0.502	No	No
16390	1.434	0.303	0.303	1.434		39.048	0.432	No	No
16400	7.112	0.272	0.272	7.112		39.704	0.49	No	No
16410	5.718	0.254	0.254	5.718		47.741	0.515	No	No
16420	12.26	0.311	0.311	12.26		36.967	0.481	No	No
16430	22.949	0.25	0.25	22.949		42.247	0.436	No	No
16440	9.014	0.292	0.292	9.014		35.182	0.469	No	No
16450	18.36	0.279	0.279	18.36		28.423	0.499	No	No
16460	12.172	0.269	0.269	12.172		36.062	0.486	No	No
16470	12.267	0.281	0.281	12.267		43.142	0.507	No	No
16480	17.161	0.3	0.3	17.161		46.494	0.449	No	No
16490	12.694	0.259	0.259	12.694		32.354	0.501	No	No
16500	14.421	0.261	0.261	14.421		43.623	0.457	No	No
16510	19.364	0.261	0.261	19.364		39.001	0.543	No	No
16520	8.043	0.263	0.263	8.043		34.648	0.452	No	No
16530	3.609	0.27	0.27	3.609		45.087	0.48	No	No
16540	11.395	0.27	0.27	11.395		47.533	0.492	No	No
16550	17.508	0.274	0.274	17.508		36.776	0.43	No	No
16560	6.756	0.25	0.25	6.756		23.765	0.417	No	No
16570	6.815	0.267	0.267	6.815		47.833	0.438	No	No
16580	12.645	0.265	0.265	12.645		51.512	0.468	No	No
16590	14.979	0.267	0.267	14.979		44.698	0.496	No	No
16600	13.604	0.268	0.268	13.604		43.065	0.527	No	No
16610	7.297	0.271	0.271	7.297		38.496	0.497	No	No
16620	12.403	0.254	0.254	12.403		37.528	0.488	No	No
16630	9.714	0.268	0.268	9.714		33.267	0.499	No	No
16640	15.712	0.28	0.28	15.712		33.963	0.481	No	No
16650	12.674	0.272	0.272	12.674		39.678	0.507	No	No
16660	16.141	0.274	0.274	16.141		38.682	0.397	No	No
16670	12.161	0.274	0.274	12.161		39.051	0.438	No	No
16680	5.156	0.29	0.29	5.156		44.815	0.454	No	No
16690	11.991	0.276	0.276	11.991		40.26	0.543	No	No
16700	10.6	0.262	0.262	10.6		46.704	0.456	No	No
16710	14.295	0.265	0.265	14.295		47.387	0.489	No	No
16720	12.141	0.258	0.258	12.141		20.163	0.523	No	No
16730	7.383	0.265	0.265	7.383		37.736	0.484	No	No
16740	15.773	0.27	0.27	15.773		40.997	0.5	No	No
16750	0.991	0.265	0.265	0.991		20.391	0.519	No	No
16760	2.748	0.282	0.282	2.748		31.153	0.503	No	No
16770	12.71	0.266	0.266	12.71		36.069	0.474	No	No
16780	5.465	0.266	0.266	5.465		35.93	0.496	No	No
16790	5.815	0.252	0.252	5.815		29.078	0.486	No	No
16800	22.599	0.274	0.274	22.599		29.324	0.506	No	No
16810	12.424	0.252	0.252	12.424		45.551	0.473	No	No
16820	3.179	0.275	0.275	3.179		31.166	0.452	No	No
16830	25.664	0.248	0.248	25.664		38.487	0.493	No	No
16840	8.223	0.254	0.254	8.223		31.332	0.462	No	No
16850	3.27	0.253	0.253	3.27		53.612	0.438	No	No
16860	23.022	0.282	0.282	23.022		42.845	0.479	No	No
16870	6.348	0.266	0.266	6.348		35.875	0.446	No	No
16880	6.96	0.282	0.282	6.96		56.711	0.516	No	No
16890	3.316	0.26	0.26	3.316		37.012	0.473	No	No
16900	11.979	0.296	0.296	11.979		40.498	0.489	No	No
16910	2.788	0.264	0.264	2.788		31.607	0.495	No	No
16920	2.744	0.272	0.272	2.744		25.217	0.454	No	No
16930	19.753	0.268	0.268	19.753		42.917	0.504	No	No
16940	7.809	0.262	0.262	7.809		56.085	0.447	No	No
16950	4.858	0.268	0.268	4.858		31.502	0.525	No	No
16960	14.495	0.259	0.259	14.495		36.496	0.542	No	No
16970	1.429	0.269	0.269	1.429		32.754	0.488	No	No
16980	14.107	0.254	0.254	14.107		44.391	0.505	No	No
16990	12.271	0.262	0.262	12.271		36.377	0.463	No	No
17000	3.915	0.269	0.269	3.915		40.91	0.492	No	No
17010	9.356	0.274	0.274	9.356		32.791	0.46	No	No
17020	7.331	0.263	0.263	7.331		42.55	0.47	No	No
17030	11.429	0.3	0.3	11.429		19.066	0.521	No	No
17040	10.884	0.256	0.256	10.884		38.813	0.521	No	No
17050	10.585	0.268	0.268	10.585		33.827	0.54	No	No
17060	15.593	0.261	0.261	15.593		47.027	0.532	No	No
17070	15.293	0.257	0.257	15.293		31.601	0.488	No	No
17080	10.366	0.26	0.26	10.366		45.698	0.562	No	No
17090	6.679	0.262	0.262	6.679		20.484	0.529	No	No
17100	2.855	0.293	0.293	2.855		31.589	0.5	No	No
17110	15.738	0.282	0.282	15.738		42.029	0.486	No	No
17120	14.945	0.26	0.26	14.945		30.068	0.493	No	No
17130	6.156	0.29	0.29	6.156		37.688	0.533	No	No
17140	12.549	0.281	0.281	12.549		36.039	0.512	No	No
17150	7.307	0.272	0.272	7.307		33.507	0.518	No	No
17160	19.198	0.279	0.279	19.198		30.862	0.541	No	No
17170	19.497	0.31	0.31	19.497		34.694	0.478	No	No
17180	15.492	0.291	0.291	15.492		43.025	0.469	No	No
17190	18.259	0.281	0.281	18.259		39.478	0.489	No	No
17200	19.861	0.28	0.28	19.861		18.26	0.468	No	No
17210	6.266	0.297	0.297	6.266		36.406	0.473	No	No
17220	26.189	0.282	0.282	26.189		41.339	0.484	No	No
17230	8.421	0.285	0.285	8.421		29.352	0.452	No	No
17240	6.59	0.294	0.294	6.59		40.084	0.446	No	No
17250	8.27	0.279	0.279	8.27		26.604	0.45	No	No
17260	5.858	0.26	0.26	5.858		31.292	0.467	No	No
17270	9.419	0.282	0.282	9.419		28.436	0.479	No	No
17280	8.566	0.269	0.269	8.566		37.302	0.535	No	No
17290	24.801	0.288	0.288	24.801		37.547	0.544	No	No
17300	14.673	0.278	0.278	14.673		43.555	0.459	No	No
17310	14.475	0.268	0.268	14.475		29.79	0.523	No	No
17320	12.243	0.288	0.288	12.243		23.387	0.507	No	No
17330	8.349	0.286	0.286	8.349		33.221	0.472	No	No
17340	12.494	0.268	0.268	12.494		36.356	0.518	No	No
17350	11.475	0.262	0.262	11.475		28.585	0.495	No	No
17360	14.897	0.258	0.258	14.897		28.659	0.488	No	No
17370	28.457	0.296	0.296	28.457		45.469	0.482	No	No
17380	18.371	0.274	0.274	18.371		24.126	0.505	No	No
17390	40.667	0.291	No	No		41.764	0.504	No	No
17400	4.526	0.266	0.266	4.526		28.819	0.484	No	No
17410	14.203	0.268	0.268	14.203		35.604	0.44	No	No
17420	12.07	0.26	0.26	12.07		29.101	0.425	No	No
17430	9.7	0.291	0.291	9.7		36.704	0.45	No	No
17440	18.262	0.277	0.277	18.262		37.445	0.464	No	No
17450	12.995	0.267	0.267	12.995		15.101	0.317	0.317	15.101
17460	29.69	0.273	0.273	29.69		10.786	0.264	0.264	10.786
17470	9.998	0.255	0.255	9.998		6.554	0.251	0.251	6.554
17480	20.495	0.311	0.311	20.495		12.943	0.262	0.262	12.943
17490	9.593	0.252	0.252	9.593		12.129	0.272	0.272	12.129
17500	25.714	0.292	0.292	25.714		13.953	0.276	0.276	13.953
17510	12.583	0.287	0.287	12.583		7.643	0.277	0.277	7.643
17520	14.309	0.289	0.289	14.309		12.094	0.269	0.269	12.094
17530	19.747	0.246	0.246	19.747		21.635	0.299	0.299	21.635
17540	21.226	0.246	0.246	21.226		4.81	0.256	0.256	4.81
17550	17.558	0.272	0.272	17.558		3.555	0.255	0.255	3.555
17560	7.563	0.286	0.286	7.563		9.887	0.265	0.265	9.887
17570	16.368	0.276	0.276	16.368		39.404	0.453	No	No
17580	7.122	0.289	0.289	7.122		32.124	0.414	No	No
17590	10.123	0.302	0.302	10.123		40.85	0.385	No	No
17600	26.369	0.347	0.347	26.369		7.246	0.284	0.284	7.246
17610	5.969	0.326	0.326	5.969		15.611	0.319	0.319	15.611
17620	6.979	0.272	0.272	6.979		2.684	0.282	0.282	2.684
17630	6.143	0.264	0.264	6.143		39.994	0.324	No	No
17640	21.531	0.261	0.261	21.531		35.461	0.431	No	No
17650	21.632	0.268	0.268	21.632		35.76	0.471	No	No
17660	4.81	0.28	0.28	4.81		49.305	0.49	No	No
17670	11.847	0.285	0.285	11.847		45.637	0.39	No	No
17680	0.569	0.287	0.287	0.569		39.416	0.392	No	No
17690	15.715	0.261	0.261	15.715		42.046	0.401	No	No
17700	10.946	0.274	0.274	10.946		26.28	0.38	No	No
17710	7.394	0.265	0.265	7.394		25.586	0.31	0.31	25.586
17720	5.269	0.26	0.26	5.269		9.958	0.258	0.258	9.958
17730	36.987	0.289	No	No		15.633	0.263	0.263	15.633
17740	23.105	0.257	0.257	23.105		1.764	0.274	0.274	1.764
17750	2.363	0.26	0.26	2.363		13.651	0.257	0.257	13.651
17760	11.439	0.257	0.257	11.439		11.984	0.273	0.273	11.984
17770	7.741	0.262	0.262	7.741		18.832	0.262	0.262	18.832
17780	6.952	0.249	0.249	6.952		13.982	0.28	0.28	13.982
17790	15.461	0.268	0.268	15.461		12.854	0.272	0.272	12.854
17800	10.854	0.268	0.268	10.854		7.85	0.258	0.258	7.85
17810	21.181	0.267	0.267	21.181		0.768	0.299	0.299	0.768
17820	10.936	0.261	0.261	10.936		10.709	0.279	0.279	10.709
17830	22.599	0.293	0.293	22.599		19.426	0.26	0.26	19.426
17840	9.667	0.272	0.272	9.667		10.943	0.26	0.26	10.943
17850	1.451	0.276	0.276	1.451		28.626	0.259	0.259	28.626
17860	2.844	0.273	0.273	2.844		37.314	0.417	No	No
17870	26.598	0.276	0.276	26.598		51.426	0.398	No	No
17880	6.382	0.266	0.266	6.382		9.39	0.272	0.272	9.39
17890	3.927	0.274	0.274	3.927		22.452	0.247	0.247	22.452
17900	14.868	0.278	0.278	14.868		11.103	0.278	0.278	11.103
17910	12.136	0.258	0.258	12.136		4.444	0.266	0.266	4.444
17920	9.521	0.258	0.258	9.521		9.851	0.262	0.262	9.851
17930	9.828	0.251	0.251	9.828		9.687	0.266	0.266	9.687
17940	16.975	0.264	0.264	16.975		9.894	0.261	0.261	9.894
17950	10.74	0.279	0.279	10.74		27.936	0.324	0.324	27.936
17960	15.888	0.256	0.256	15.888		9.013	0.274	0.274	9.013
17970	15.008	0.283	0.283	15.008		3.186	0.284	0.284	3.186
17980	9.339	0.297	0.297	9.339		5.784	0.265	0.265	5.784
17990	11.011	0.279	0.279	11.011		35.838	0.364	No	No
18000	18.856	0.273	0.273	18.856		40.645	0.404	No	No
18010	22.645	0.275	0.275	22.645		54.34	0.461	No	No
18020	17.208	0.285	0.285	17.208		41.822	0.387	No	No
18030	12.216	0.281	0.281	12.216		35.728	0.358	No	No
18040	13.585	0.287	0.287	13.585		11.085	0.292	0.292	11.085
18050	10.89	0.301	0.301	10.89		24.534	0.276	0.276	24.534
18060	16.99	0.265	0.265	16.99		9.257	0.274	0.274	9.257
18070	21.152	0.297	0.297	21.152		12.445	0.276	0.276	12.445
18080	15.333	0.268	0.268	15.333		12.492	0.258	0.258	12.492
18090	19.793	0.266	0.266	19.793		2.971	0.28	0.28	2.971
18100	5.3	0.262	0.262	5.3		22.008	0.262	0.262	22.008
18110	21.131	0.335	0.335	21.131		20.559	0.278	0.278	20.559
18120	59.918	0.378	No	No		11.318	0.273	0.273	11.318
18130	33.7	0.433	No	No		8.34	0.272	0.272	8.34
18140	36.322	0.424	No	No		3.614	0.286	0.286	3.614
18150	7.231	0.273	0.273	7.231		4.825	0.269	0.269	4.825
18160	6.51	0.331	0.331	6.51		16.973	0.288	0.288	16.973
18170	16.804	0.263	0.263	16.804		10.594	0.266	0.266	10.594
18180	2.367	0.265	0.265	2.367		9.67	0.258	0.258	9.67
18190	6.608	0.263	0.263	6.608		10.749	0.275	0.275	10.749
18200	3.149	0.273	0.273	3.149		6.141	0.288	0.288	6.141
18210	20.659	0.274	0.274	20.659		6.053	0.251	0.251	6.053
18220	6.263	0.29	0.29	6.263		2.813	0.319	0.319	2.813
18230	19.937	0.289	0.289	19.937		12.989	0.277	0.277	12.989
18240	5.891	0.265	0.265	5.891		45.514	0.491	No	No
18250	11.508	0.274	0.274	11.508		68.096	0.402	No	No
18260	6.347	0.277	0.277	6.347		59.637	0.425	No	No
18270	3.08	0.27	0.27	3.08		46.579	0.399	No	No
18280	12.45	0.26	0.26	12.45		10.486	0.27	0.27	10.486
18290	6.97	0.264	0.264	6.97		7.556	0.275	0.275	7.556
18300	14.687	0.259	0.259	14.687		31.402	0.291	No	No
18310	8.823	0.278	0.278	8.823		19.882	0.289	0.289	19.882
18320	5.919	0.317	0.317	5.919		17.924	0.249	0.249	17.924
18330	4.283	0.258	0.258	4.283		22.974	0.268	0.268	22.974
18340	6.229	0.269	0.269	6.229		5.243	0.26	0.26	5.243
18350	10.218	0.267	0.267	10.218		6.019	0.285	0.285	6.019
18360	6.184	0.269	0.269	6.184		10.708	0.267	0.267	10.708
18370	6.893	0.258	0.258	6.893		7.996	0.271	0.271	7.996
18380	16.575	0.282	0.282	16.575		3.356	0.266	0.266	3.356
18390	9.05	0.272	0.272	9.05		44.223	0.432	No	No
18400	10.785	0.281	0.281	10.785		38.715	0.358	No	No
18410	12.04	0.273	0.273	12.04		57.926	0.418	No	No
18420	7.725	0.257	0.257	7.725		44.748	0.374	No	No
18430	14.603	0.259	0.259	14.603		38.99	0.441	No	No
18440	12.844	0.262	0.262	12.844		43.105	0.473	No	No
18450	9.059	0.277	0.277	9.059		15.487	0.309	0.309	15.487
18460	11.865	0.27	0.27	11.865		33.766	0.426	No	No
18470	8.097	0.3	0.3	8.097		29.485	0.389	No	No
18480	19.701	0.284	0.284	19.701		5.113	0.277	0.277	5.113
18490	11.243	0.268	0.268	11.243		12.498	0.255	0.255	12.498
18500	83.045	0.415	No	No		16.468	0.258	0.258	16.468
18510	5.87	0.27	0.27	5.87		19.302	0.275	0.275	19.302
18520	11.721	0.286	0.286	11.721		8.003	0.285	0.285	8.003
18530	6.759	0.258	0.258	6.759		12.653	0.249	0.249	12.653
18540	28.293	0.298	0.298	28.293		19.236	0.246	0.246	19.236
18550	26.914	0.267	0.267	26.914		24.695	0.287	0.287	24.695
18560	11.318	0.277	0.277	11.318		20.269	0.274	0.274	20.269
18570	16.608	0.26	0.26	16.608		18.47	0.294	0.294	18.47
18580	1.532	0.295	0.295	1.532		16.584	0.292	0.292	16.584
18590	9.971	0.27	0.27	9.971		53.781	0.357	No	No
18600	6.834	0.265	0.265	6.834		17.918	0.284	0.284	17.918
18610	6.543	0.273	0.273	6.543		22.74	0.271	0.271	22.74
18620	15.977	0.299	0.299	15.977		37.994	0.284	No	No
18630	3.064	0.258	0.258	3.064		0.813	0.264	0.264	0.813
18640	8.562	0.255	0.255	8.562		11.946	0.248	0.248	11.946
18650	9.25	0.281	0.281	9.25		4.473	0.273	0.273	4.473
18660	7.145	0.284	0.284	7.145		35.931	0.429	No	No
18670	1.557	0.271	0.271	1.557		37.07	0.476	No	No
18680	10.531	0.297	0.297	10.531		32.095	0.39	No	No
18690	12.742	0.268	0.268	12.742		60.34	0.43	No	No
18700	13.832	0.3	0.3	13.832		11.31	0.264	0.264	11.31
18710	18.254	0.278	0.278	18.254		22.51	0.265	0.265	22.51
18720	21.926	0.295	0.295	21.926		22.057	0.267	0.267	22.057
18730	125.667	0.394	No	No		13.59	0.266	0.266	13.59
18740	12.296	0.276	0.276	12.296		47.112	0.422	No	No
18750	13.829	0.272	0.272	13.829		47.33	0.45	No	No
18760	8.95	0.276	0.276	8.95		34.049	0.431	No	No
18770	6.032	0.287	0.287	6.032		40.965	0.477	No	No
18780	23.898	0.276	0.276	23.898		44.937	0.439	No	No
18790	16.178	0.282	0.282	16.178		12.102	0.279	0.279	12.102
18800	21.472	0.26	0.26	21.472		6.839	0.258	0.258	6.839
18810	1.835	0.3	0.3	1.835		10.255	0.271	0.271	10.255
18820	16.31	0.303	0.303	16.31		22.046	0.267	0.267	22.046
18830	8.245	0.304	0.304	8.245		5.821	0.26	0.26	5.821
18840	9.462	0.264	0.264	9.462		7.596	0.307	0.307	7.596
18850	14.211	0.278	0.278	14.211		13.577	0.307	0.307	13.577
18860	11.369	0.267	0.267	11.369		21.173	0.302	0.302	21.173
18870	2.509	0.272	0.272	2.509		5.656	0.271	0.271	5.656
18880	8.652	0.269	0.269	8.652		6.931	0.27	0.27	6.931
18890	36.465	0.287	No	No		11.427	0.265	0.265	11.427
18900	19.176	0.268	0.268	19.176		41.735	0.388	No	No
18910	7.422	0.317	0.317	7.422		11.008	0.284	0.284	11.008
18920	10.797	0.273	0.273	10.797		51.353	0.463	No	No
18930	9.726	0.294	0.294	9.726		48.109	0.441	No	No
18940	5.935	0.261	0.261	5.935		38.423	0.464	No	No
18950	14.984	0.26	0.26	14.984		28.758	0.359	No	No
18960	14.915	0.302	0.302	14.915		4.598	0.277	0.277	4.598
18970	12.532	0.257	0.257	12.532		42.585	0.377	No	No
18980	7.258	0.297	0.297	7.258		26.439	0.393	No	No
18990	10.549	0.26	0.26	10.549		46.902	0.394	No	No
19000	21.319	0.266	0.266	21.319		40.368	0.468	No	No
19010	6.579	0.276	0.276	6.579		38.641	0.364	No	No
19020	10.18	0.285	0.285	10.18		51.182	0.396	No	No
19030	18.663	0.256	0.256	18.663		36.613	0.428	No	No
19040	5.845	0.262	0.262	5.845		51.468	0.422	No	No
19050	26.403	0.339	0.339	26.403		50.153	0.438	No	No
19060	11.721	0.277	0.277	11.721		21.468	0.289	0.289	21.468
19070	29.805	0.365	No	No		39.655	0.388	No	No
19080	39.246	0.396	No	No		34.712	0.38	No	No
19090	12.704	0.277	0.277	12.704		47.453	0.377	No	No
19100	5.957	0.283	0.283	5.957		35.098	0.451	No	No
19110	14.467	0.269	0.269	14.467		53.602	0.384	No	No
19120	7.369	0.256	0.256	7.369		35.946	0.39	No	No
19130	12.167	0.26	0.26	12.167		42.131	0.392	No	No
19140	7.212	0.254	0.254	7.212		42.163	0.447	No	No
19150	5.163	0.277	0.277	5.163		49.825	0.432	No	No
19160	6.027	0.26	0.26	6.027		20.037	0.266	0.266	20.037
19170	13.102	0.291	0.291	13.102		42.681	0.477	No	No
19180	9.654	0.264	0.264	9.654		40.68	0.401	No	No
19190	13.861	0.303	0.303	13.861		14.602	0.268	0.268	14.602
19200	2.771	0.291	0.291	2.771		19.359	0.265	0.265	19.359
19210	23.959	0.261	0.261	23.959		13.755	0.266	0.266	13.755
19220	6.009	0.257	0.257	6.009		11.326	0.284	0.284	11.326
19230	4.341	0.259	0.259	4.341		21.553	0.373	No	No
19240	10.414	0.267	0.267	10.414		41.077	0.423	No	No
19250	24.445	0.415	No	No		47.738	0.455	No	No
19260	2.636	0.264	0.264	2.636		58.434	0.424	No	No
19270	20.142	0.312	0.312	20.142		44.646	0.416	No	No
19280	2.301	0.283	0.283	2.301		6.936	0.268	0.268	6.936
19290	9.642	0.295	0.295	9.642		9.241	0.265	0.265	9.241
19300	20.991	0.307	0.307	20.991		17.788	0.273	0.273	17.788
19310	3.13	0.263	0.263	3.13		13.894	0.287	0.287	13.894
19320	17.865	0.276	0.276	17.865		7.458	0.294	0.294	7.458
19330	33.106	0.372	No	No		15.805	0.298	0.298	15.805
19340	10.488	0.266	0.266	10.488		11.233	0.282	0.282	11.233
19350	15.147	0.279	0.279	15.147		10.056	0.272	0.272	10.056
19360	14.228	0.26	0.26	14.228		5.258	0.303	0.303	5.258
19370	6.889	0.266	0.266	6.889		1.157	0.265	0.265	1.157
19380	8.239	0.245	0.245	8.239		4.679	0.291	0.291	4.679
19390	10.983	0.266	0.266	10.983		4.452	0.263	0.263	4.452
19400	5.393	0.273	0.273	5.393		7.265	0.287	0.287	7.265
19410	13.666	0.28	0.28	13.666		10.183	0.262	0.262	10.183
19420	12.555	0.279	0.279	12.555		15.331	0.285	0.285	15.331
19430	8.259	0.283	0.283	8.259		12.988	0.267	0.267	12.988
19440	18.09	0.257	0.257	18.09		12.094	0.255	0.255	12.094
19450	2.68	0.277	0.277	2.68		27.743	0.274	0.274	27.743
19460	19.355	0.249	0.249	19.355		14.126	0.292	0.292	14.126
19470	17.764	0.273	0.273	17.764		4.85	0.262	0.262	4.85
19480	1.192	0.256	0.256	1.192		55.54	0.401	No	No
19490	9.75	0.287	0.287	9.75		18.526	0.285	0.285	18.526
19500	3.919	0.258	0.258	3.919		21.9	0.269	0.269	21.9
19510	1.309	0.277	0.277	1.309		19.631	0.274	0.274	19.631
19520	13.245	0.287	0.287	13.245		14.182	0.27	0.27	14.182
19530	5.727	0.266	0.266	5.727		16.954	0.331	0.331	16.954
19540	17.575	0.262	0.262	17.575		19.79	0.282	0.282	19.79
19550	3.632	0.256	0.256	3.632		11.704	0.276	0.276	11.704
19560	12.299	0.273	0.273	12.299		13.644	0.279	0.279	13.644
19570	17.575	0.265	0.265	17.575		16.746	0.278	0.278	16.746
19580	10.631	0.269	0.269	10.631		25.609	0.293	0.293	25.609
19590	17.08	0.272	0.272	17.08		14.49	0.253	0.253	14.49
19600	9.033	0.271	0.271	9.033		4.101	0.263	0.263	4.101
19610	9.406	0.266	0.266	9.406		14.59	0.271	0.271	14.59
19620	19.391	0.269	0.269	19.391		6.259	0.275	0.275	6.259
19630	20.009	0.292	0.292	20.009		7.695	0.277	0.277	7.695
19640	10.836	0.26	0.26	10.836		6.803	0.256	0.256	6.803
19650	9.115	0.278	0.278	9.115		29.642	0.277	0.277	29.642
19660	1.446	0.282	0.282	1.446		31.002	0.446	No	No
19670	10.6	0.269	0.269	10.6		48.485	0.428	No	No
19680	17.797	0.283	0.283	17.797		33.636	0.435	No	No
19690	23.56	0.266	0.266	23.56		35.115	0.464	No	No
19700	22.319	0.268	0.268	22.319		32.409	0.496	No	No
19710	31.669	0.28	No	No		38.955	0.522	No	No
19720	9.413	0.28	0.28	9.413		40.798	0.476	No	No
19730	18.264	0.269	0.269	18.264		48.567	0.542	No	No
19740	20.803	0.268	0.268	20.803		30.346	0.49	No	No
19750	14.051	0.256	0.256	14.051		32.273	0.474	No	No
19760	33.602	0.283	No	No		29.19	0.468	No	No
19770	5.036	0.277	0.277	5.036		67.524	0.437	No	No
19780	10.793	0.267	0.267	10.793		47.062	0.365	No	No
19790	15.91	0.248	0.248	15.91		7.517	0.269	0.269	7.517
19800	11.449	0.272	0.272	11.449		23.727	0.267	0.267	23.727
19810	13.128	0.27	0.27	13.128		5.982	0.255	0.255	5.982
19820	16.423	0.28	0.28	16.423		12.316	0.257	0.257	12.316
19830	19.679	0.281	0.281	19.679		20.795	0.26	0.26	20.795
19840	14.579	0.258	0.258	14.579		22.548	0.287	0.287	22.548
19850	23.609	0.266	0.266	23.609		29.44	0.261	0.261	29.44
19860	16.31	0.269	0.269	16.31		14.195	0.316	0.316	14.195
19870	22.053	0.294	0.294	22.053		19.081	0.263	0.263	19.081
19880	13.845	0.271	0.271	13.845		10.468	0.254	0.254	10.468
19890	21.155	0.266	0.266	21.155		35.661	0.376	No	No
19900	10.593	0.265	0.265	10.593		6.807	0.316	0.316	6.807
19910	8.741	0.299	0.299	8.741		16.164	0.264	0.264	16.164
19920	7.487	0.284	0.284	7.487		11.666	0.257	0.257	11.666
19930	15.385	0.292	0.292	15.385		12.553	0.256	0.256	12.553
19940	5.044	0.289	0.289	5.044		22.383	0.285	0.285	22.383
19950	18.595	0.261	0.261	18.595		17.401	0.276	0.276	17.401
19960	16.21	0.276	0.276	16.21		16.613	0.262	0.262	16.613
19970	19.468	0.281	0.281	19.468		7.186	0.273	0.273	7.186
19980	17.164	0.259	0.259	17.164		7.209	0.265	0.265	7.209
[truncated: 3,010 more rows]

## Sheet: Asn501...Lys353|Tyr501...Lys353
Time	Asn501…Lys353 N501 angle	Asn501…Lys353 N501 dist	dist<=0.35 nm	angle<=30 deg.		Tyr501…Lys353 N501Y angle	Tyr501…Lys353 N501Y dist	dist<=0.35 nm	angle<=30 deg.
0	84.82	0.52	No	No		110.781	0.272	No	No
10	73.852	0.569	No	No		86.063	0.315	No	No
20	80.897	0.511	No	No		19.518	0.28	0.28	19.518
30	93.666	0.526	No	No		5.119	0.267	0.267	5.119
40	85.667	0.463	No	No		27.205	0.308	0.308	27.205
50	75.661	0.519	No	No		9.394	0.288	0.288	9.394
60	86.653	0.493	No	No		10.852	0.308	0.308	10.852
70	81.277	0.566	No	No		9.434	0.303	0.303	9.434
80	97.465	0.573	No	No		25.493	0.316	0.316	25.493
90	94.913	0.529	No	No		11.008	0.308	0.308	11.008
100	90.172	0.574	No	No		4.245	0.271	0.271	4.245
110	99.621	0.522	No	No		1.758	0.278	0.278	1.758
120	87.163	0.471	No	No		17.452	0.29	0.29	17.452
130	89.547	0.461	No	No		22.808	0.289	0.289	22.808
140	87.133	0.522	No	No		94.622	0.287	No	No
150	98.893	0.482	No	No		94.208	0.285	No	No
160	89.63	0.509	No	No		160.323	0.323	No	No
170	80.386	0.534	No	No		123.436	0.271	No	No
180	98.002	0.546	No	No		98.735	0.318	No	No
190	95.886	0.49	No	No		118.931	0.311	No	No
200	98.259	0.546	No	No		119.634	0.28	No	No
210	108.786	0.579	No	No		110.156	0.31	No	No
220	104.504	0.54	No	No		101.128	0.299	No	No
230	85.545	0.531	No	No		99.068	0.283	No	No
240	70.913	0.503	No	No		126.748	0.346	No	No
250	89.679	0.489	No	No		118.049	0.303	No	No
260	87.224	0.585	No	No		119.979	0.296	No	No
270	88.587	0.521	No	No		114.257	0.3	No	No
280	105.879	0.503	No	No		122.073	0.298	No	No
290	101.694	0.494	No	No		130.537	0.32	No	No
300	106.004	0.506	No	No		161.488	0.39	No	No
310	102.232	0.498	No	No		129.29	0.301	No	No
320	87.094	0.423	No	No		25.999	0.307	0.307	25.999
330	76.566	0.553	No	No		8.485	0.299	0.299	8.485
340	81.022	0.543	No	No		69.092	0.329	No	No
350	100.317	0.485	No	No		89.988	0.32	No	No
360	96.909	0.509	No	No		83.469	0.29	No	No
370	99.971	0.545	No	No		84.757	0.284	No	No
380	107.685	0.486	No	No		79.66	0.322	No	No
390	85.792	0.479	No	No		80.706	0.279	No	No
400	115.865	0.468	No	No		79.11	0.326	No	No
410	96.341	0.54	No	No		110.479	0.279	No	No
420	87.355	0.496	No	No		138.859	0.294	No	No
430	65.933	0.494	No	No		9.246	0.305	0.305	9.246
440	114.943	0.549	No	No		8.27	0.286	0.286	8.27
450	94.533	0.489	No	No		7.378	0.277	0.277	7.378
460	87.391	0.532	No	No		104.879	0.308	No	No
470	98.538	0.544	No	No		31.105	0.312	No	No
480	97.969	0.444	No	No		35.926	0.316	No	No
490	100.401	0.52	No	No		21.676	0.287	0.287	21.676
500	89.05	0.524	No	No		11.821	0.288	0.288	11.821
510	106.669	0.486	No	No		20.494	0.308	0.308	20.494
520	87.303	0.48	No	No		5.922	0.286	0.286	5.922
530	82.731	0.519	No	No		19.753	0.317	0.317	19.753
540	85.686	0.532	No	No		22.24	0.312	0.312	22.24
550	84.598	0.482	No	No		7.129	0.299	0.299	7.129
560	107.179	0.496	No	No		19.409	0.291	0.291	19.409
570	92.823	0.508	No	No		15.103	0.315	0.315	15.103
580	108.386	0.479	No	No		20.513	0.313	0.313	20.513
590	109.198	0.5	No	No		27.217	0.319	0.319	27.217
600	93.475	0.494	No	No		108.329	0.298	No	No
610	90.096	0.527	No	No		109.246	0.29	No	No
620	101.259	0.532	No	No		113.503	0.299	No	No
630	89.046	0.499	No	No		76.233	0.314	No	No
640	77.181	0.515	No	No		89.726	0.338	No	No
650	83.233	0.47	No	No		113.935	0.277	No	No
660	105.948	0.511	No	No		105.74	0.293	No	No
670	107.397	0.52	No	No		122.997	0.291	No	No
680	88.679	0.528	No	No		113.138	0.286	No	No
690	82.455	0.571	No	No		90.152	0.301	No	No
700	107.563	0.49	No	No		96.585	0.278	No	No
710	103.353	0.6	No	No		112.669	0.305	No	No
720	92.139	0.493	No	No		103.021	0.3	No	No
730	99.081	0.507	No	No		105.188	0.29	No	No
740	90.368	0.524	No	No		105.532	0.295	No	No
750	104.061	0.502	No	No		93.388	0.322	No	No
760	93.136	0.486	No	No		48.874	0.285	No	No
770	105.485	0.427	No	No		108.88	0.297	No	No
780	100.858	0.54	No	No		113.682	0.292	No	No
790	106.148	0.521	No	No		25.381	0.292	0.292	25.381
800	79.786	0.531	No	No		109.356	0.292	No	No
810	100.209	0.513	No	No		123.162	0.312	No	No
820	98.614	0.491	No	No		66.215	0.309	No	No
830	113.146	0.515	No	No		20.219	0.296	0.296	20.219
840	90.757	0.516	No	No		110.312	0.529	No	No
850	97.016	0.55	No	No		108.31	0.417	No	No
860	90.037	0.489	No	No		122.137	0.527	No	No
870	102.183	0.525	No	No		107.381	0.489	No	No
880	85.619	0.545	No	No		108.056	0.479	No	No
890	87.278	0.485	No	No		111.044	0.526	No	No
900	105.508	0.516	No	No		112.283	0.516	No	No
910	102.057	0.53	No	No		111.686	0.458	No	No
920	95.199	0.523	No	No		103.484	0.458	No	No
930	76.48	0.525	No	No		102.149	0.275	No	No
940	86.8	0.466	No	No		97.965	0.311	No	No
950	102.654	0.497	No	No		88.884	0.36	No	No
960	95.74	0.529	No	No		112.069	0.312	No	No
970	92.612	0.508	No	No		95.811	0.282	No	No
980	102.878	0.5	No	No		104.165	0.29	No	No
990	90.486	0.494	No	No		60.558	0.306	No	No
1000	96.199	0.51	No	No		77.053	0.378	No	No
1010	84.557	0.488	No	No		110.717	0.287	No	No
1020	89.254	0.496	No	No		86.793	0.295	No	No
1030	99.024	0.491	No	No		76.941	0.316	No	No
1040	117.946	0.514	No	No		60.211	0.321	No	No
1050	105.437	0.457	No	No		67.39	0.303	No	No
1060	105.562	0.472	No	No		100.685	0.3	No	No
1070	96.845	0.471	No	No		93.139	0.305	No	No
1080	116.234	0.489	No	No		119.362	0.328	No	No
1090	107.702	0.517	No	No		80.65	0.315	No	No
1100	92.115	0.473	No	No		85.896	0.308	No	No
1110	103.017	0.504	No	No		102.298	0.299	No	No
1120	102.201	0.539	No	No		114.596	0.303	No	No
1130	97.716	0.548	No	No		108.765	0.289	No	No
1140	101.088	0.486	No	No		99.911	0.325	No	No
1150	94.877	0.438	No	No		111.99	0.292	No	No
1160	103.618	0.451	No	No		107.037	0.3	No	No
1170	96.964	0.446	No	No		118.559	0.295	No	No
1180	90.279	0.488	No	No		114.666	0.281	No	No
1190	101.717	0.412	No	No		115.414	0.297	No	No
1200	87.402	0.504	No	No		112.487	0.314	No	No
1210	80.976	0.503	No	No		116.925	0.29	No	No
1220	93.238	0.476	No	No		98.883	0.282	No	No
1230	95.52	0.493	No	No		130.187	0.335	No	No
1240	101.123	0.516	No	No		123.751	0.286	No	No
1250	111.528	0.527	No	No		89.665	0.286	No	No
1260	102.28	0.538	No	No		98.708	0.295	No	No
1270	97.04	0.488	No	No		105.244	0.302	No	No
1280	103.093	0.463	No	No		105.624	0.276	No	No
1290	93.538	0.478	No	No		115.142	0.28	No	No
1300	97.547	0.504	No	No		106.815	0.354	No	No
1310	96.613	0.492	No	No		111.041	0.29	No	No
1320	95.126	0.453	No	No		121.163	0.299	No	No
1330	84.822	0.497	No	No		108.522	0.334	No	No
1340	99.796	0.48	No	No		120.754	0.321	No	No
1350	96.542	0.512	No	No		103.343	0.28	No	No
1360	82.848	0.506	No	No		115.796	0.284	No	No
1370	93.923	0.41	No	No		105.873	0.3	No	No
1380	109.423	0.452	No	No		96.405	0.285	No	No
1390	104.878	0.489	No	No		9.48	0.274	0.274	9.48
1400	103.152	0.496	No	No		3.903	0.292	0.292	3.903
1410	84.563	0.433	No	No		10.134	0.288	0.288	10.134
1420	108.426	0.399	No	No		20.156	0.319	0.319	20.156
1430	91.747	0.547	No	No		2.237	0.297	0.297	2.237
1440	103.25	0.458	No	No		9.078	0.278	0.278	9.078
1450	92.252	0.435	No	No		14.263	0.289	0.289	14.263
1460	96.854	0.48	No	No		10.134	0.297	0.297	10.134
1470	104.039	0.489	No	No		4.401	0.293	0.293	4.401
1480	113.358	0.468	No	No		17.632	0.286	0.286	17.632
1490	107.532	0.525	No	No		4.909	0.31	0.31	4.909
1500	102.719	0.473	No	No		19.822	0.341	0.341	19.822
1510	99.625	0.485	No	No		9.204	0.286	0.286	9.204
1520	99.309	0.501	No	No		12.392	0.273	0.273	12.392
1530	89.344	0.468	No	No		19.329	0.301	0.301	19.329
1540	105.602	0.52	No	No		0.829	0.289	0.289	0.829
1550	92.368	0.518	No	No		19.304	0.309	0.309	19.304
1560	96.772	0.517	No	No		6.819	0.311	0.311	6.819
1570	105.783	0.441	No	No		1.467	0.282	0.282	1.467
1580	95.812	0.484	No	No		10.229	0.287	0.287	10.229
1590	107.133	0.466	No	No		10.712	0.288	0.288	10.712
1600	99.142	0.494	No	No		25.947	0.318	0.318	25.947
1610	98.021	0.499	No	No		8.974	0.297	0.297	8.974
1620	110.841	0.507	No	No		17.384	0.281	0.281	17.384
1630	110.063	0.505	No	No		46.746	0.414	No	No
1640	100.665	0.489	No	No		60.991	0.321	No	No
1650	106.943	0.467	No	No		83.437	0.291	No	No
1660	99.384	0.481	No	No		117.521	0.311	No	No
1670	119.914	0.484	No	No		88.009	0.271	No	No
1680	83.422	0.42	No	No		107.813	0.488	No	No
1690	91.012	0.441	No	No		98.097	0.579	No	No
1700	95.239	0.458	No	No		105.61	0.642	No	No
1710	109.367	0.477	No	No		109.532	0.576	No	No
1720	118.277	0.448	No	No		102.597	0.538	No	No
1730	97.413	0.5	No	No		102.126	0.55	No	No
1740	82.988	0.406	No	No		91.036	0.575	No	No
1750	108.046	0.413	No	No		101.826	0.639	No	No
1760	106.033	0.497	No	No		107.37	0.641	No	No
1770	89.017	0.476	No	No		90.437	0.591	No	No
1780	100.638	0.499	No	No		98.028	0.616	No	No
1790	104.435	0.527	No	No		102.157	0.588	No	No
1800	108.457	0.534	No	No		108.066	0.575	No	No
1810	102.863	0.512	No	No		93.286	0.637	No	No
1820	95.254	0.513	No	No		88.168	0.535	No	No
1830	93.272	0.5	No	No		100.271	0.508	No	No
1840	98.099	0.5	No	No		88.04	0.527	No	No
1850	89.086	0.467	No	No		95.63	0.599	No	No
1860	99.13	0.476	No	No		105.82	0.479	No	No
1870	94.701	0.426	No	No		92.067	0.584	No	No
1880	92.354	0.491	No	No		88.745	0.545	No	No
1890	95.704	0.494	No	No		101.207	0.432	No	No
1900	101.602	0.502	No	No		90.725	0.447	No	No
1910	89.415	0.505	No	No		71.429	0.436	No	No
1920	102.538	0.545	No	No		72.21	0.403	No	No
1930	101.008	0.547	No	No		79.683	0.389	No	No
1940	100.812	0.54	No	No		91.976	0.516	No	No
1950	101.3	0.493	No	No		90.113	0.493	No	No
1960	98.855	0.435	No	No		92.338	0.537	No	No
1970	115.998	0.501	No	No		94.389	0.487	No	No
1980	116.666	0.457	No	No		86.36	0.484	No	No
1990	114.498	0.499	No	No		88.585	0.422	No	No
2000	102.091	0.435	No	No		90.941	0.498	No	No
2010	103.851	0.443	No	No		74.301	0.502	No	No
2020	107.025	0.477	No	No		94.896	0.497	No	No
2030	100.476	0.458	No	No		92.702	0.501	No	No
2040	98.063	0.45	No	No		97.918	0.491	No	No
2050	100.103	0.475	No	No		88.824	0.49	No	No
2060	86.973	0.479	No	No		116.878	0.518	No	No
2070	89.528	0.471	No	No		103.996	0.446	No	No
2080	98.947	0.539	No	No		103.727	0.593	No	No
2090	94.36	0.44	No	No		92.756	0.505	No	No
2100	96.024	0.5	No	No		97.964	0.491	No	No
2110	100.729	0.507	No	No		92.801	0.483	No	No
2120	87.599	0.483	No	No		98.922	0.467	No	No
2130	96.541	0.479	No	No		85.544	0.48	No	No
2140	100.687	0.522	No	No		99.436	0.47	No	No
2150	81.514	0.483	No	No		98.55	0.488	No	No
2160	97.599	0.543	No	No		81.872	0.493	No	No
2170	96.682	0.492	No	No		102.223	0.575	No	No
2180	91.908	0.497	No	No		64.442	0.427	No	No
2190	102.387	0.502	No	No		94.258	0.594	No	No
2200	102.34	0.48	No	No		92.202	0.438	No	No
2210	100.91	0.465	No	No		91.386	0.474	No	No
2220	91.415	0.475	No	No		93.355	0.565	No	No
2230	96.829	0.497	No	No		81.195	0.552	No	No
2240	91.49	0.457	No	No		74.134	0.498	No	No
2250	115.094	0.531	No	No		80.088	0.536	No	No
2260	106.012	0.523	No	No		76.874	0.534	No	No
2270	103.99	0.474	No	No		86.473	0.477	No	No
2280	107.775	0.486	No	No		74.537	0.498	No	No
2290	121.722	0.472	No	No		75.737	0.458	No	No
2300	92.884	0.477	No	No		69.222	0.429	No	No
2310	94.398	0.495	No	No		89.796	0.413	No	No
2320	103.246	0.472	No	No		83.5	0.423	No	No
2330	86.988	0.449	No	No		63.701	0.336	No	No
2340	86.258	0.489	No	No		68.247	0.481	No	No
2350	96.616	0.477	No	No		64.314	0.384	No	No
2360	96.73	0.432	No	No		79.879	0.404	No	No
2370	103.327	0.461	No	No		71.626	0.453	No	No
2380	108.697	0.476	No	No		68.145	0.49	No	No
2390	92.004	0.458	No	No		75.813	0.513	No	No
2400	101.063	0.436	No	No		84.22	0.573	No	No
2410	98.936	0.475	No	No		122.153	0.459	No	No
2420	98.575	0.459	No	No		61.422	0.474	No	No
2430	109.256	0.431	No	No		96.348	0.449	No	No
2440	90.001	0.401	No	No		77.908	0.488	No	No
2450	96.635	0.505	No	No		77.736	0.417	No	No
2460	118.007	0.435	No	No		58.477	0.428	No	No
2470	98.049	0.434	No	No		82.449	0.445	No	No
2480	106.23	0.471	No	No		73.446	0.381	No	No
2490	103.851	0.433	No	No		67.481	0.5	No	No
2500	98.968	0.434	No	No		77.71	0.475	No	No
2510	82.02	0.48	No	No		76.217	0.409	No	No
2520	92.57	0.468	No	No		78.699	0.414	No	No
2530	87.165	0.405	No	No		66.122	0.448	No	No
2540	103.727	0.402	No	No		86.162	0.405	No	No
2550	82.625	0.372	No	No		89.786	0.506	No	No
2560	88.126	0.46	No	No		96.296	0.438	No	No
2570	96.463	0.451	No	No		87.451	0.461	No	No
2580	99.317	0.445	No	No		88.927	0.463	No	No
2590	92.202	0.429	No	No		94.574	0.465	No	No
2600	89.663	0.456	No	No		86.074	0.49	No	No
2610	95.547	0.415	No	No		97.753	0.467	No	No
2620	100.674	0.447	No	No		94.83	0.49	No	No
2630	100.085	0.472	No	No		84.06	0.446	No	No
2640	100.354	0.456	No	No		97.364	0.505	No	No
2650	94.139	0.382	No	No		90.288	0.51	No	No
2660	68.187	0.433	No	No		94.223	0.419	No	No
2670	103.595	0.42	No	No		109.542	0.501	No	No
2680	98.004	0.424	No	No		80.917	0.4	No	No
2690	86.891	0.46	No	No		95.303	0.486	No	No
2700	113.914	0.477	No	No		88.014	0.404	No	No
2710	110.084	0.454	No	No		97.555	0.434	No	No
2720	90.062	0.5	No	No		73.55	0.433	No	No
2730	82.898	0.453	No	No		66.178	0.484	No	No
2740	88.456	0.481	No	No		106.986	0.502	No	No
2750	98.783	0.465	No	No		39.76	0.413	No	No
2760	78.95	0.377	No	No		50.001	0.442	No	No
2770	89.202	0.449	No	No		38.248	0.459	No	No
2780	79.809	0.44	No	No		67.101	0.473	No	No
2790	88.308	0.467	No	No		48.372	0.456	No	No
2800	92.404	0.442	No	No		84.626	0.622	No	No
2810	78.21	0.441	No	No		74.235	0.516	No	No
2820	99.084	0.472	No	No		63.25	0.472	No	No
2830	83.301	0.449	No	No		61.002	0.529	No	No
2840	125.053	0.44	No	No		63.425	0.539	No	No
2850	87.844	0.422	No	No		91.54	0.487	No	No
2860	76.608	0.438	No	No		79.714	0.497	No	No
2870	92.345	0.425	No	No		86.381	0.422	No	No
2880	84.527	0.5	No	No		89.167	0.449	No	No
2890	98.26	0.488	No	No		69.949	0.487	No	No
2900	80.254	0.432	No	No		162.777	0.455	No	No
2910	88.941	0.485	No	No		51.947	0.38	No	No
2920	93.221	0.516	No	No		101.118	0.331	No	No
2930	100.937	0.487	No	No		80.616	0.306	No	No
2940	90.271	0.478	No	No		75.868	0.429	No	No
2950	97.336	0.452	No	No		98.497	0.462	No	No
2960	90.972	0.469	No	No		99.771	0.414	No	No
2970	105.585	0.478	No	No		73.165	0.457	No	No
2980	103.645	0.496	No	No		41.598	0.436	No	No
2990	105.949	0.448	No	No		101.643	0.444	No	No
3000	81.986	0.47	No	No		96.903	0.442	No	No
3010	94.473	0.504	No	No		93.385	0.441	No	No
3020	101.83	0.519	No	No		23.22	0.444	No	No
3030	94.323	0.462	No	No		147.169	0.436	No	No
3040	93.826	0.521	No	No		129.551	0.393	No	No
3050	98.568	0.463	No	No		22.499	0.444	No	No
3060	100.581	0.486	No	No		111.666	0.381	No	No
3070	78.797	0.447	No	No		122.991	0.433	No	No
3080	115.255	0.478	No	No		173.01	0.479	No	No
3090	88.284	0.489	No	No		153.433	0.486	No	No
3100	107.156	0.498	No	No		158.016	0.451	No	No
3110	90.473	0.468	No	No		145.263	0.517	No	No
3120	88.109	0.491	No	No		150.49	0.477	No	No
3130	84.817	0.486	No	No		156.124	0.466	No	No
3140	79.299	0.417	No	No		163.258	0.472	No	No
3150	108.748	0.479	No	No		131.712	0.557	No	No
3160	102.007	0.361	No	No		75.378	0.527	No	No
3170	102.361	0.479	No	No		81.83	0.529	No	No
3180	85.723	0.402	No	No		73.926	0.48	No	No
3190	95.561	0.477	No	No		78.735	0.467	No	No
3200	95.448	0.479	No	No		93.132	0.587	No	No
3210	101.951	0.457	No	No		72.037	0.49	No	No
3220	91.622	0.479	No	No		83.018	0.464	No	No
3230	97.93	0.466	No	No		74.16	0.466	No	No
3240	88.015	0.453	No	No		79.608	0.451	No	No
3250	97.952	0.497	No	No		59.105	0.487	No	No
3260	84.033	0.46	No	No		173.919	0.453	No	No
3270	95.445	0.425	No	No		149.26	0.489	No	No
3280	99.876	0.444	No	No		167.987	0.485	No	No
3290	91.276	0.514	No	No		161.228	0.495	No	No
3300	107.673	0.439	No	No		157.803	0.507	No	No
3310	85.577	0.521	No	No		164.843	0.437	No	No
3320	90.282	0.514	No	No		154.169	0.555	No	No
3330	113.99	0.469	No	No		164.049	0.493	No	No
3340	103.728	0.447	No	No		152.037	0.539	No	No
3350	97.392	0.474	No	No		139.505	0.553	No	No
3360	117.891	0.505	No	No		151.328	0.577	No	No
3370	102.151	0.498	No	No		158.354	0.49	No	No
3380	97.278	0.481	No	No		146.707	0.476	No	No
3390	118.504	0.474	No	No		160.792	0.448	No	No
3400	91.311	0.506	No	No		142.227	0.455	No	No
3410	107.606	0.53	No	No		144.34	0.414	No	No
3420	121.005	0.502	No	No		143.296	0.481	No	No
3430	127.519	0.51	No	No		151.931	0.51	No	No
3440	126.542	0.444	No	No		159.778	0.453	No	No
3450	124.563	0.489	No	No		95.951	0.493	No	No
3460	130.676	0.534	No	No		49.144	0.496	No	No
3470	104.737	0.511	No	No		62.28	0.498	No	No
3480	106.566	0.496	No	No		95.646	0.528	No	No
3490	102.849	0.417	No	No		85.309	0.463	No	No
3500	120.001	0.457	No	No		88.212	0.485	No	No
3510	113.442	0.422	No	No		85.819	0.484	No	No
3520	126.218	0.448	No	No		85.944	0.486	No	No
3530	122.14	0.543	No	No		93.078	0.515	No	No
3540	89.236	0.423	No	No		103.135	0.52	No	No
3550	113.151	0.521	No	No		93.893	0.481	No	No
3560	88.195	0.465	No	No		90.515	0.458	No	No
3570	90.452	0.453	No	No		72.396	0.497	No	No
3580	126.526	0.45	No	No		63.329	0.452	No	No
3590	111.014	0.459	No	No		59.525	0.405	No	No
3600	132.196	0.483	No	No		75.054	0.456	No	No
3610	116.129	0.543	No	No		79.539	0.462	No	No
3620	110.104	0.517	No	No		93.307	0.466	No	No
3630	116.579	0.426	No	No		78.669	0.392	No	No
3640	105.845	0.495	No	No		66.786	0.506	No	No
3650	113.26	0.528	No	No		82.457	0.45	No	No
3660	112.099	0.516	No	No		85.712	0.424	No	No
3670	101.403	0.419	No	No		76.451	0.513	No	No
3680	124.689	0.494	No	No		82.399	0.574	No	No
3690	134.54	0.494	No	No		67.702	0.48	No	No
3700	123.025	0.493	No	No		73.357	0.539	No	No
3710	108.481	0.47	No	No		49.433	0.431	No	No
3720	137.118	0.533	No	No		75.3	0.411	No	No
3730	113.117	0.51	No	No		66.027	0.487	No	No
3740	131.911	0.532	No	No		93.136	0.561	No	No
3750	120.055	0.475	No	No		94.563	0.494	No	No
3760	124.698	0.494	No	No		104.344	0.514	No	No
3770	121.167	0.544	No	No		80.899	0.509	No	No
3780	117.474	0.535	No	No		86.301	0.474	No	No
3790	128.306	0.533	No	No		70.24	0.481	No	No
3800	116.89	0.54	No	No		140.236	0.584	No	No
3810	135.075	0.489	No	No		165.196	0.552	No	No
3820	118.128	0.516	No	No		163.243	0.476	No	No
3830	122.888	0.531	No	No		151.856	0.504	No	No
3840	121.051	0.543	No	No		159.881	0.513	No	No
3850	111.678	0.486	No	No		146.547	0.504	No	No
3860	115.421	0.475	No	No		133.428	0.576	No	No
3870	134.967	0.516	No	No		143.295	0.508	No	No
3880	115.69	0.522	No	No		136.331	0.614	No	No
3890	115.769	0.514	No	No		144.669	0.547	No	No
3900	95.17	0.513	No	No		132.717	0.529	No	No
3910	81.845	0.53	No	No		157.389	0.465	No	No
3920	103.365	0.446	No	No		152.655	0.526	No	No
3930	112.569	0.498	No	No		150.392	0.443	No	No
3940	106.212	0.49	No	No		146.343	0.456	No	No
3950	114.661	0.51	No	No		156.882	0.51	No	No
3960	111.314	0.523	No	No		167.217	0.424	No	No
3970	108.04	0.405	No	No		106.32	0.544	No	No
3980	94.203	0.434	No	No		94.07	0.46	No	No
3990	116.24	0.467	No	No		92.472	0.531	No	No
4000	89.938	0.457	No	No		86.107	0.476	No	No
4010	109.499	0.464	No	No		97.008	0.485	No	No
4020	116.126	0.515	No	No		85.123	0.477	No	No
4030	100.945	0.407	No	No		61.436	0.492	No	No
4040	117.164	0.445	No	No		81.104	0.559	No	No
4050	103.078	0.454	No	No		91.001	0.559	No	No
4060	100.555	0.418	No	No		86.326	0.562	No	No
4070	111.301	0.504	No	No		88.567	0.542	No	No
4080	109.745	0.491	No	No		106.235	0.591	No	No
4090	106.077	0.508	No	No		74.132	0.48	No	No
4100	97.493	0.474	No	No		78.469	0.519	No	No
4110	95.529	0.488	No	No		88.967	0.516	No	No
4120	105.48	0.484	No	No		69.475	0.431	No	No
4130	109.18	0.43	No	No		90.191	0.526	No	No
4140	110.62	0.458	No	No		87.202	0.577	No	No
4150	104.837	0.468	No	No		84.402	0.494	No	No
4160	107.368	0.511	No	No		75.828	0.438	No	No
4170	107.997	0.508	No	No		82.145	0.472	No	No
4180	110.526	0.555	No	No		88.553	0.444	No	No
4190	105.219	0.566	No	No		86.439	0.458	No	No
4200	106.137	0.516	No	No		90.952	0.45	No	No
4210	114.296	0.522	No	No		93.226	0.468	No	No
4220	96.38	0.501	No	No		86.248	0.43	No	No
4230	114.862	0.502	No	No		93.261	0.444	No	No
4240	108.154	0.499	No	No		99.418	0.45	No	No
4250	90.436	0.525	No	No		84.762	0.487	No	No
4260	109.088	0.565	No	No		85.238	0.603	No	No
4270	115.969	0.516	No	No		83.084	0.477	No	No
4280	119.229	0.527	No	No		94.751	0.556	No	No
4290	102.297	0.543	No	No		78.901	0.452	No	No
4300	108.532	0.517	No	No		88.734	0.477	No	No
4310	108.619	0.52	No	No		77.084	0.462	No	No
4320	103.433	0.504	No	No		61.523	0.519	No	No
4330	98.67	0.478	No	No		67.126	0.523	No	No
4340	118.107	0.53	No	No		150.032	0.577	No	No
4350	107.652	0.467	No	No		159.449	0.543	No	No
4360	97.385	0.529	No	No		160.943	0.51	No	No
4370	119.409	0.492	No	No		134.333	0.552	No	No
4380	116.709	0.516	No	No		143.195	0.521	No	No
4390	110.364	0.441	No	No		141.477	0.493	No	No
4400	105.954	0.487	No	No		156.217	0.506	No	No
4410	103.725	0.509	No	No		153.439	0.493	No	No
4420	122.606	0.512	No	No		164.337	0.441	No	No
4430	114.398	0.474	No	No		157.235	0.506	No	No
4440	119.16	0.491	No	No		154.791	0.464	No	No
4450	107.189	0.53	No	No		161.839	0.436	No	No
4460	110.038	0.527	No	No		162.481	0.487	No	No
4470	111.823	0.493	No	No		140.44	0.476	No	No
4480	107.184	0.517	No	No		156.149	0.575	No	No
4490	112.839	0.478	No	No		168.882	0.516	No	No
4500	89.894	0.461	No	No		164.834	0.541	No	No
4510	97.694	0.437	No	No		163.834	0.443	No	No
4520	118.361	0.533	No	No		167.997	0.468	No	No
4530	115.242	0.518	No	No		161.026	0.467	No	No
4540	101.456	0.49	No	No		163.757	0.483	No	No
4550	115.13	0.509	No	No		82.22	0.363	No	No
4560	88.937	0.429	No	No		92.136	0.438	No	No
4570	96.338	0.457	No	No		97.775	0.459	No	No
4580	100.923	0.446	No	No		59.63	0.458	No	No
4590	116.072	0.486	No	No		51.565	0.398	No	No
4600	105.348	0.442	No	No		44.812	0.44	No	No
4610	105.48	0.461	No	No		24.67	0.433	No	No
4620	87.563	0.418	No	No		33.079	0.438	No	No
4630	118.366	0.444	No	No		36.355	0.419	No	No
4640	102.874	0.531	No	No		36.482	0.417	No	No
4650	114.295	0.494	No	No		30.246	0.415	No	No
4660	116.671	0.497	No	No		137.472	0.419	No	No
4670	102.849	0.479	No	No		138.341	0.485	No	No
4680	102.25	0.472	No	No		133.425	0.415	No	No
4690	92.755	0.471	No	No		135.163	0.432	No	No
4700	90.107	0.54	No	No		136.797	0.405	No	No
4710	93.72	0.485	No	No		131.418	0.446	No	No
4720	100.596	0.472	No	No		80.753	0.416	No	No
4730	92.076	0.52	No	No		68.395	0.442	No	No
4740	104.947	0.517	No	No		67.57	0.436	No	No
4750	96.413	0.519	No	No		91.83	0.459	No	No
4760	88.069	0.483	No	No		103.622	0.415	No	No
4770	98.955	0.501	No	No		94.871	0.47	No	No
4780	104.328	0.492	No	No		86.63	0.42	No	No
4790	117.16	0.45	No	No		26.688	0.439	No	No
4800	98.139	0.516	No	No		35.662	0.455	No	No
4810	101.273	0.501	No	No		45.828	0.449	No	No
4820	98.221	0.508	No	No		143.617	0.346	No	No
4830	92.965	0.474	No	No		125.815	0.431	No	No
4840	103.275	0.516	No	No		125.045	0.47	No	No
4850	105.85	0.496	No	No		132.074	0.429	No	No
4860	107.99	0.505	No	No		143.28	0.439	No	No
4870	96.296	0.468	No	No		124.346	0.47	No	No
4880	87.411	0.481	No	No		89.631	0.432	No	No
4890	97.821	0.523	No	No		90.929	0.434	No	No
4900	96.735	0.539	No	No		84.104	0.448	No	No
4910	105.779	0.493	No	No		89.539	0.472	No	No
4920	91.909	0.457	No	No		84.553	0.303	No	No
4930	107.14	0.459	No	No		133.48	0.469	No	No
4940	94.676	0.438	No	No		127.547	0.449	No	No
4950	83.126	0.45	No	No		138.424	0.443	No	No
4960	85.489	0.494	No	No		125.414	0.475	No	No
4970	87.284	0.468	No	No		64.541	0.344	No	No
4980	105.321	0.431	No	No		81.833	0.401	No	No
4990	108.489	0.507	No	No		85.046	0.439	No	No
5000	100.408	0.399	No	No		85.262	0.386	No	No
5010	86.667	0.481	No	No		72.601	0.338	No	No
5020	112.375	0.486	No	No		10.047	0.289	0.289	10.047
5030	86.361	0.487	No	No		11.849	0.332	0.332	11.849
5040	107.499	0.511	No	No		114.336	0.304	No	No
5050	114.519	0.493	No	No		105.613	0.407	No	No
5060	101.49	0.537	No	No		87.735	0.438	No	No
5070	105.754	0.46	No	No		111.187	0.311	No	No
5080	123.561	0.483	No	No		100.636	0.309	No	No
5090	77.81	0.459	No	No		95.406	0.306	No	No
5100	97.321	0.474	No	No		98.256	0.384	No	No
5110	96.305	0.515	No	No		110.211	0.321	No	No
5120	94.319	0.452	No	No		112.181	0.282	No	No
5130	84.833	0.53	No	No		27.094	0.374	No	No
5140	110.517	0.498	No	No		12.943	0.319	0.319	12.943
5150	120.997	0.491	No	No		4.426	0.32	0.32	4.426
5160	106.506	0.524	No	No		8.496	0.33	0.33	8.496
5170	87.189	0.483	No	No		8.826	0.272	0.272	8.826
5180	104.379	0.5	No	No		3.321	0.283	0.283	3.321
5190	93.159	0.5	No	No		4.026	0.339	0.339	4.026
5200	116.201	0.507	No	No		20.966	0.291	0.291	20.966
5210	115.227	0.562	No	No		3.729	0.294	0.294	3.729
5220	116.187	0.501	No	No		11.291	0.303	0.303	11.291
5230	113.949	0.514	No	No		20.451	0.325	0.325	20.451
5240	103.829	0.49	No	No		6.175	0.316	0.316	6.175
5250	106.786	0.549	No	No		51.023	0.41	No	No
5260	88.721	0.477	No	No		22.752	0.43	No	No
5270	75.918	0.468	No	No		107.37	0.413	No	No
5280	100.423	0.519	No	No		136.343	0.49	No	No
5290	103.748	0.486	No	No		91.388	0.308	No	No
5300	92.546	0.423	No	No		110.963	0.37	No	No
5310	99.077	0.493	No	No		102.699	0.298	No	No
5320	111.782	0.49	No	No		8.938	0.293	0.293	8.938
5330	92.471	0.471	No	No		13.931	0.306	0.306	13.931
5340	108.073	0.521	No	No		10.093	0.269	0.269	10.093
5350	97.53	0.54	No	No		152.518	0.46	No	No
5360	86.113	0.495	No	No		155.099	0.412	No	No
5370	101.021	0.525	No	No		157.073	0.453	No	No
5380	113.677	0.477	No	No		155.823	0.421	No	No
5390	116.329	0.525	No	No		160.579	0.478	No	No
5400	113.17	0.561	No	No		149.075	0.479	No	No
5410	104.398	0.482	No	No		162.055	0.512	No	No
5420	119.166	0.492	No	No		137.702	0.439	No	No
5430	103.707	0.496	No	No		159.79	0.505	No	No
5440	100.422	0.493	No	No		159.983	0.57	No	No
5450	100.366	0.499	No	No		147.486	0.521	No	No
5460	110.014	0.469	No	No		156.488	0.505	No	No
5470	108.568	0.446	No	No		158.128	0.513	No	No
5480	104.141	0.52	No	No		175.254	0.421	No	No
5490	92.509	0.535	No	No		154.736	0.503	No	No
5500	116.578	0.488	No	No		168.232	0.389	No	No
5510	111.147	0.517	No	No		157.087	0.438	No	No
5520	87.134	0.559	No	No		167.643	0.451	No	No
5530	82.356	0.502	No	No		155.466	0.393	No	No
5540	98.219	0.55	No	No		161.433	0.475	No	No
5550	104.439	0.539	No	No		150.024	0.504	No	No
5560	94.456	0.5	No	No		170.358	0.471	No	No
5570	117.391	0.496	No	No		156.067	0.473	No	No
5580	90.467	0.491	No	No		161.252	0.442	No	No
5590	88.002	0.457	No	No		156.397	0.535	No	No
5600	106.426	0.505	No	No		176.754	0.476	No	No
5610	95.541	0.54	No	No		167.618	0.399	No	No
5620	106.159	0.503	No	No		154.394	0.505	No	No
5630	110.657	0.494	No	No		160.066	0.6	No	No
5640	101.95	0.533	No	No		167.465	0.463	No	No
5650	107.785	0.489	No	No		170.725	0.423	No	No
5660	92.464	0.439	No	No		168.856	0.438	No	No
5670	106.191	0.442	No	No		73.661	0.477	No	No
5680	103.78	0.515	No	No		85.795	0.504	No	No
5690	98.143	0.476	No	No		69.883	0.477	No	No
5700	94.456	0.454	No	No		75.385	0.464	No	No
5710	106.11	0.492	No	No		82.732	0.495	No	No
5720	97.25	0.49	No	No		82.708	0.5	No	No
5730	107.387	0.516	No	No		74.105	0.439	No	No
5740	106.9	0.548	No	No		75.702	0.493	No	No
5750	110.667	0.533	No	No		70.916	0.459	No	No
5760	101.248	0.489	No	No		84.273	0.471	No	No
5770	88.178	0.479	No	No		75.585	0.462	No	No
5780	109.817	0.421	No	No		93.704	0.525	No	No
5790	94.981	0.478	No	No		83.114	0.463	No	No
5800	111.956	0.439	No	No		81.242	0.479	No	No
5810	95.14	0.492	No	No		94.143	0.528	No	No
5820	87.911	0.489	No	No		91.711	0.481	No	No
5830	57.804	0.378	No	No		74.845	0.514	No	No
5840	35.106	0.368	No	No		87.579	0.45	No	No
5850	82.22	0.441	No	No		72.087	0.483	No	No
5860	33.77	0.326	No	No		85.966	0.452	No	No
5870	17.453	0.318	0.318	17.453		77.962	0.521	No	No
5880	36.738	0.408	No	No		93.111	0.475	No	No
5890	32.523	0.318	No	No		69.822	0.45	No	No
5900	25.407	0.278	0.278	25.407		59.316	0.406	No	No
5910	52.224	0.357	No	No		67.519	0.428	No	No
5920	48.018	0.347	No	No		75.661	0.523	No	No
5930	50.671	0.433	No	No		83.513	0.499	No	No
5940	27.632	0.283	0.283	27.632		70.023	0.458	No	No
5950	27.513	0.297	0.297	27.513		74.154	0.516	No	No
5960	28.289	0.316	0.316	28.289		68.779	0.482	No	No
5970	27.168	0.368	No	No		87.979	0.512	No	No
5980	85.86	0.372	No	No		88.623	0.497	No	No
5990	43.129	0.289	No	No		83.663	0.49	No	No
6000	37.865	0.306	No	No		79.232	0.488	No	No
6010	59.402	0.376	No	No		90.491	0.456	No	No
6020	65.142	0.36	No	No		85.411	0.499	No	No
6030	79.657	0.387	No	No		81.248	0.447	No	No
6040	58.849	0.389	No	No		61.889	0.454	No	No
6050	61.353	0.369	No	No		89.707	0.468	No	No
6060	74.768	0.352	No	No		94.816	0.498	No	No
6070	40.498	0.311	No	No		87.589	0.467	No	No
6080	58.127	0.323	No	No		74.95	0.471	No	No
6090	88.078	0.377	No	No		88.377	0.491	No	No
6100	79.476	0.354	No	No		78.588	0.446	No	No
6110	71.024	0.384	No	No		84.045	0.492	No	No
6120	71.254	0.338	No	No		93.521	0.509	No	No
6130	57.7	0.374	No	No		71.633	0.513	No	No
6140	56.712	0.32	No	No		97.032	0.518	No	No
6150	52.643	0.373	No	No		86.744	0.478	No	No
6160	62.129	0.361	No	No		85.188	0.45	No	No
6170	34.071	0.432	No	No		72.224	0.412	No	No
6180	73.518	0.376	No	No		79.744	0.426	No	No
6190	87.921	0.406	No	No		75.223	0.454	No	No
6200	70.023	0.37	No	No		65.464	0.447	No	No
6210	72.585	0.37	No	No		80.767	0.508	No	No
6220	52.313	0.364	No	No		84.655	0.539	No	No
6230	79.502	0.38	No	No		82.968	0.482	No	No
6240	49.072	0.325	No	No		75.604	0.527	No	No
6250	75.143	0.324	No	No		82.03	0.485	No	No
6260	47.715	0.383	No	No		78.071	0.5	No	No
6270	49.215	0.348	No	No		70.84	0.42	No	No
6280	45.115	0.321	No	No		68.726	0.564	No	No
6290	101.111	0.375	No	No		91.513	0.469	No	No
6300	58.174	0.4	No	No		74.538	0.46	No	No
6310	72.961	0.399	No	No		78.122	0.511	No	No
6320	66.315	0.386	No	No		88.545	0.491	No	No
6330	76.547	0.36	No	No		84.843	0.483	No	No
6340	63.675	0.361	No	No		87.839	0.457	No	No
6350	67.802	0.357	No	No		79.501	0.542	No	No
6360	86.909	0.4	No	No		59.822	0.548	No	No
6370	87.116	0.389	No	No		76.135	0.631	No	No
6380	70.46	0.41	No	No		66.602	0.565	No	No
6390	70.981	0.408	No	No		54.957	0.517	No	No
6400	94.596	0.365	No	No		75.584	0.596	No	No
6410	64.285	0.367	No	No		81.926	0.484	No	No
6420	43.213	0.359	No	No		73.626	0.496	No	No
6430	91.867	0.374	No	No		91.057	0.455	No	No
6440	75.769	0.399	No	No		84.809	0.491	No	No
6450	67.413	0.403	No	No		79.001	0.477	No	No
6460	67.2	0.401	No	No		82.77	0.463	No	No
6470	58.204	0.432	No	No		94.883	0.45	No	No
6480	53.738	0.327	No	No		67.893	0.591	No	No
6490	75.982	0.4	No	No		89.145	0.508	No	No
6500	79.129	0.334	No	No		95.59	0.519	No	No
6510	51.618	0.42	No	No		78.604	0.5	No	No
6520	55.303	0.335	No	No		86.312	0.474	No	No
6530	66.117	0.4	No	No		94.765	0.461	No	No
6540	37.079	0.35	No	No		78.863	0.401	No	No
6550	73.791	0.336	No	No		59.285	0.549	No	No
6560	74.345	0.387	No	No		84.843	0.496	No	No
6570	52.343	0.342	No	No		49.283	0.46	No	No
6580	72.995	0.426	No	No		46.695	0.461	No	No
6590	83.494	0.373	No	No		65.606	0.467	No	No
6600	57.223	0.357	No	No		74.891	0.52	No	No
6610	81.059	0.367	No	No		79.143	0.463	No	No
6620	59.708	0.384	No	No		72.942	0.48	No	No
6630	52.78	0.377	No	No		78.288	0.531	No	No
6640	67.436	0.389	No	No		84.633	0.521	No	No
6650	67.483	0.361	No	No		60.751	0.599	No	No
6660	70.549	0.335	No	No		65.167	0.496	No	No
6670	22.413	0.304	0.304	22.413		80.725	0.505	No	No
6680	89.568	0.427	No	No		76.053	0.471	No	No
6690	97.58	0.393	No	No		82.001	0.494	No	No
6700	89.118	0.368	No	No		77.409	0.486	No	No
6710	74.907	0.319	No	No		81.332	0.483	No	No
6720	76.506	0.386	No	No		79.071	0.494	No	No
6730	80.712	0.413	No	No		86.349	0.514	No	No
6740	62.391	0.359	No	No		80.955	0.477	No	No
6750	62.253	0.36	No	No		77.166	0.506	No	No
6760	70.476	0.42	No	No		67.667	0.46	No	No
6770	70.354	0.448	No	No		64.773	0.489	No	No
6780	77.187	0.375	No	No		72.14	0.431	No	No
6790	73.107	0.359	No	No		62.687	0.448	No	No
6800	63.053	0.363	No	No		79.648	0.449	No	No
6810	61.185	0.354	No	No		60.084	0.454	No	No
6820	47.629	0.319	No	No		62.026	0.469	No	No
6830	69.729	0.331	No	No		77.235	0.48	No	No
6840	76.527	0.369	No	No		76.184	0.501	No	No
6850	72.972	0.386	No	No		87.566	0.438	No	No
6860	45.367	0.392	No	No		82.79	0.501	No	No
6870	79.02	0.407	No	No		86.354	0.505	No	No
6880	83.277	0.444	No	No		74.1	0.584	No	No
6890	58.559	0.36	No	No		74.312	0.474	No	No
6900	64.62	0.351	No	No		78.545	0.528	No	No
6910	50.909	0.332	No	No		75.016	0.532	No	No
6920	66.321	0.341	No	No		65.558	0.474	No	No
6930	96.884	0.396	No	No		78.804	0.497	No	No
6940	69.171	0.375	No	No		69.844	0.449	No	No
6950	46.401	0.384	No	No		79.41	0.468	No	No
6960	73.309	0.414	No	No		84.793	0.424	No	No
6970	91.059	0.365	No	No		65.514	0.483	No	No
6980	85.063	0.365	No	No		64.171	0.49	No	No
6990	63.856	0.353	No	No		79.764	0.426	No	No
7000	97.704	0.358	No	No		80.416	0.451	No	No
7010	69.689	0.334	No	No		83.751	0.463	No	No
7020	66.464	0.396	No	No		72.091	0.489	No	No
7030	85.298	0.38	No	No		62.65	0.462	No	No
7040	83.306	0.397	No	No		73.226	0.446	No	No
7050	65.963	0.314	No	No		89.251	0.41	No	No
7060	78.725	0.447	No	No		94.099	0.495	No	No
7070	77.386	0.361	No	No		93.711	0.482	No	No
7080	79.935	0.359	No	No		61.557	0.482	No	No
7090	62.363	0.383	No	No		72.532	0.542	No	No
7100	59.213	0.373	No	No		82.014	0.534	No	No
7110	47.87	0.377	No	No		88.498	0.492	No	No
7120	51.814	0.359	No	No		59.388	0.528	No	No
7130	73.853	0.377	No	No		98.569	0.51	No	No
7140	70.198	0.425	No	No		76.902	0.449	No	No
7150	61.757	0.444	No	No		84.716	0.476	No	No
7160	55.576	0.37	No	No		90.677	0.5	No	No
7170	67.659	0.389	No	No		80.703	0.52	No	No
7180	29.601	0.322	0.322	29.601		90.481	0.536	No	No
7190	54.747	0.366	No	No		75.667	0.479	No	No
7200	69.475	0.38	No	No		71.458	0.516	No	No
7210	57.975	0.398	No	No		68.47	0.475	No	No
7220	55.372	0.378	No	No		74.593	0.517	No	No
7230	50.966	0.346	No	No		77.251	0.453	No	No
7240	57.444	0.357	No	No		74.78	0.453	No	No
7250	53.514	0.316	No	No		76.216	0.484	No	No
7260	68.365	0.392	No	No		75.537	0.481	No	No
7270	38.511	0.394	No	No		71.901	0.472	No	No
7280	57.159	0.387	No	No		76.52	0.482	No	No
7290	57.044	0.399	No	No		80.969	0.482	No	No
7300	63.462	0.387	No	No		81.496	0.523	No	No
7310	70.684	0.39	No	No		99.315	0.486	No	No
7320	74.661	0.378	No	No		80.505	0.498	No	No
7330	50.309	0.372	No	No		83.377	0.497	No	No
7340	55.978	0.357	No	No		70.515	0.449	No	No
7350	54.644	0.323	No	No		72.091	0.493	No	No
7360	44.384	0.38	No	No		67.039	0.441	No	No
7370	44.777	0.372	No	No		99.634	0.539	No	No
7380	61.811	0.331	No	No		36.72	0.479	No	No
7390	64.579	0.375	No	No		160.822	0.562	No	No
7400	63.014	0.371	No	No		153.314	0.497	No	No
7410	72.354	0.411	No	No		145.518	0.541	No	No
7420	56.934	0.401	No	No		159.304	0.453	No	No
7430	64.236	0.451	No	No		159.587	0.491	No	No
7440	66.313	0.37	No	No		169.604	0.431	No	No
7450	78.245	0.429	No	No		155.221	0.502	No	No
7460	59.31	0.438	No	No		165.254	0.423	No	No
7470	47.666	0.351	No	No		163.541	0.488	No	No
7480	54.943	0.475	No	No		163.533	0.519	No	No
7490	41.553	0.369	No	No		154.881	0.488	No	No
7500	99.099	0.356	No	No		157.573	0.462	No	No
7510	74.911	0.417	No	No		161.187	0.46	No	No
7520	89.518	0.388	No	No		161.545	0.462	No	No
7530	85.564	0.38	No	No		165.545	0.524	No	No
7540	68.354	0.341	No	No		161.762	0.49	No	No
7550	64.068	0.388	No	No		146.945	0.531	No	No
7560	60.64	0.37	No	No		156.337	0.523	No	No
7570	50.28	0.392	No	No		172.091	0.498	No	No
7580	74.206	0.427	No	No		162.252	0.455	No	No
7590	42.083	0.369	No	No		158.047	0.496	No	No
7600	68.655	0.384	No	No		149.381	0.451	No	No
7610	56.383	0.327	No	No		151.52	0.498	No	No
7620	76.142	0.443	No	No		161.189	0.508	No	No
7630	77.659	0.378	No	No		142.591	0.486	No	No
7640	87.978	0.344	No	No		158.648	0.525	No	No
7650	82.713	0.392	No	No		164.423	0.466	No	No
7660	53.785	0.394	No	No		148.463	0.462	No	No
7670	61.223	0.371	No	No		154.068	0.516	No	No
7680	78.917	0.366	No	No		158.403	0.463	No	No
7690	102.81	0.42	No	No		157.27	0.48	No	No
7700	106.933	0.42	No	No		172.898	0.454	No	No
7710	57.615	0.372	No	No		161.238	0.456	No	No
7720	47.527	0.362	No	No		155.45	0.405	No	No
7730	90.738	0.382	No	No		172.709	0.413	No	No
7740	63.434	0.309	No	No		149.722	0.409	No	No
7750	83.216	0.457	No	No		113.756	0.482	No	No
7760	64.661	0.338	No	No		171.019	0.371	No	No
7770	67.269	0.36	No	No		169.34	0.416	No	No
7780	110.43	0.387	No	No		156.386	0.437	No	No
7790	68.421	0.348	No	No		167.467	0.456	No	No
7800	61.383	0.365	No	No		158.202	0.473	No	No
7810	87.872	0.381	No	No		157.313	0.465	No	No
7820	71.421	0.406	No	No		160.684	0.524	No	No
7830	100.467	0.405	No	No		157.355	0.491	No	No
7840	89.559	0.364	No	No		148.164	0.442	No	No
7850	82.607	0.414	No	No		65.428	0.438	No	No
7860	50.954	0.345	No	No		77.855	0.446	No	No
7870	85.404	0.363	No	No		88.463	0.416	No	No
7880	75.091	0.39	No	No		154.493	0.453	No	No
7890	58.948	0.334	No	No		151.584	0.476	No	No
7900	48.113	0.367	No	No		154.462	0.464	No	No
7910	88.214	0.377	No	No		147.271	0.467	No	No
7920	57.881	0.369	No	No		82.005	0.531	No	No
7930	52.967	0.413	No	No		84.299	0.618	No	No
7940	56.916	0.357	No	No		54.809	0.419	No	No
7950	88.265	0.395	No	No		58.743	0.37	No	No
7960	72.697	0.373	No	No		51.026	0.392	No	No
7970	57.715	0.37	No	No		54.475	0.322	No	No
7980	60.789	0.363	No	No		60.803	0.4	No	No
7990	48.287	0.376	No	No		51.648	0.358	No	No
8000	90.976	0.354	No	No		55.27	0.396	No	No
8010	65.809	0.371	No	No		61.962	0.433	No	No
8020	50.539	0.384	No	No		65.996	0.432	No	No
8030	92.246	0.381	No	No		67.772	0.489	No	No
8040	76.243	0.408	No	No		59.862	0.439	No	No
8050	62.5	0.347	No	No		60.469	0.451	No	No
8060	63.227	0.36	No	No		64.797	0.444	No	No
8070	97.001	0.36	No	No		64.099	0.485	No	No
8080	49.405	0.388	No	No		61.431	0.463	No	No
8090	59.602	0.384	No	No		70.131	0.46	No	No
8100	93.992	0.405	No	No		70.797	0.477	No	No
8110	74.392	0.408	No	No		88.747	0.467	No	No
8120	58.535	0.386	No	No		71.687	0.451	No	No
8130	54.863	0.323	No	No		63.631	0.408	No	No
8140	72.201	0.314	No	No		67.722	0.411	No	No
8150	79.075	0.387	No	No		69.75	0.418	No	No
8160	53.26	0.339	No	No		62.111	0.486	No	No
8170	68.559	0.382	No	No		48.954	0.494	No	No
8180	78.809	0.409	No	No		71.153	0.429	No	No
8190	63.155	0.354	No	No		51.555	0.461	No	No
8200	62.244	0.384	No	No		24.185	0.367	No	No
8210	51.898	0.38	No	No		40.48	0.335	No	No
8220	44.406	0.348	No	No		48.93	0.345	No	No
8230	46.54	0.365	No	No		52.983	0.411	No	No
8240	97.588	0.418	No	No		62.246	0.459	No	No
8250	63.757	0.305	No	No		64.185	0.462	No	No
8260	88.92	0.347	No	No		69.391	0.485	No	No
8270	34.892	0.383	No	No		73.089	0.42	No	No
8280	47.2	0.345	No	No		66.973	0.511	No	No
8290	104.178	0.421	No	No		65.969	0.508	No	No
8300	104.545	0.351	No	No		52.461	0.524	No	No
8310	88.402	0.391	No	No		73.907	0.459	No	No
8320	79.934	0.351	No	No		64.981	0.506	No	No
8330	72.07	0.43	No	No		62.904	0.428	No	No
8340	95.745	0.361	No	No		69.324	0.474	No	No
8350	84.726	0.332	No	No		68.975	0.418	No	No
8360	95.092	0.383	No	No		150.909	0.507	No	No
8370	70.869	0.347	No	No		147.535	0.376	No	No
8380	93.425	0.416	No	No		163.184	0.47	No	No
8390	88.484	0.35	No	No		144.504	0.449	No	No
8400	89.596	0.377	No	No		55.339	0.585	No	No
8410	84.784	0.348	No	No		65.189	0.553	No	No
8420	90.19	0.362	No	No		62.531	0.447	No	No
8430	82.792	0.394	No	No		50.736	0.447	No	No
8440	85.742	0.439	No	No		65.918	0.556	No	No
8450	79.864	0.384	No	No		63.306	0.508	No	No
8460	89.88	0.391	No	No		58.518	0.545	No	No
8470	84.311	0.369	No	No		66.155	0.452	No	No
8480	91.677	0.441	No	No		56.451	0.428	No	No
8490	79.751	0.36	No	No		66.504	0.532	No	No
8500	72.459	0.399	No	No		72.935	0.57	No	No
8510	86.229	0.37	No	No		92.363	0.461	No	No
8520	81.438	0.313	No	No		86.256	0.479	No	No
8530	69.889	0.373	No	No		90.391	0.542	No	No
8540	92.771	0.352	No	No		88.631	0.536	No	No
8550	74.244	0.373	No	No		94.652	0.537	No	No
8560	51.438	0.331	No	No		87.338	0.478	No	No
8570	70.776	0.365	No	No		90.656	0.459	No	No
8580	39.457	0.374	No	No		90.434	0.396	No	No
8590	68.482	0.33	No	No		88.962	0.446	No	No
8600	46.316	0.361	No	No		87.782	0.456	No	No
8610	85.111	0.352	No	No		96.035	0.427	No	No
8620	42.528	0.333	No	No		90.084	0.482	No	No
8630	93.029	0.406	No	No		75.458	0.471	No	No
8640	68.476	0.375	No	No		100.362	0.55	No	No
8650	49.414	0.327	No	No		108.7	0.488	No	No
8660	89.144	0.377	No	No		95.401	0.514	No	No
8670	62.265	0.377	No	No		74.372	0.344	No	No
8680	89.171	0.39	No	No		167.95	0.356	No	No
8690	68.697	0.409	No	No		171.42	0.37	No	No
8700	65.484	0.369	No	No		159.159	0.373	No	No
8710	57.399	0.363	No	No		156.018	0.399	No	No
8720	14.55	0.303	0.303	14.55		163.244	0.393	No	No
8730	8.831	0.286	0.286	8.831		176.233	0.355	No	No
8740	6.795	0.292	0.292	6.795		154.933	0.379	No	No
8750	12.745	0.303	0.303	12.745		164.931	0.335	No	No
8760	20.066	0.317	0.317	20.066		126.786	0.399	No	No
8770	15.798	0.28	0.28	15.798		86.017	0.495	No	No
8780	4.366	0.291	0.291	4.366		90.295	0.436	No	No
8790	7.326	0.294	0.294	7.326		101.651	0.444	No	No
8800	11.917	0.304	0.304	11.917		93.687	0.411	No	No
8810	10.976	0.276	0.276	10.976		86.633	0.439	No	No
8820	19.704	0.272	0.272	19.704		87.686	0.488	No	No
8830	7.439	0.284	0.284	7.439		98.164	0.493	No	No
8840	21.943	0.29	0.29	21.943		72.039	0.489	No	No
8850	15.681	0.285	0.285	15.681		90.618	0.484	No	No
8860	22.604	0.275	0.275	22.604		93.221	0.476	No	No
8870	10.802	0.28	0.28	10.802		101.476	0.389	No	No
8880	42.972	0.305	No	No		85.104	0.462	No	No
8890	26.268	0.268	0.268	26.268		106.759	0.508	No	No
8900	100.397	0.382	No	No		95.776	0.466	No	No
8910	59.848	0.337	No	No		91.696	0.429	No	No
8920	23.633	0.379	No	No		81.043	0.429	No	No
8930	47.569	0.39	No	No		99.706	0.524	No	No
8940	36.531	0.297	No	No		93.63	0.335	No	No
8950	20.103	0.29	0.29	20.103		87.363	0.342	No	No
8960	42.722	0.291	No	No		66.349	0.439	No	No
8970	21.284	0.295	0.295	21.284		94.838	0.44	No	No
8980	27.231	0.3	0.3	27.231		90.461	0.375	No	No
8990	36.888	0.354	No	No		92.97	0.524	No	No
9000	77.746	0.349	No	No		87.031	0.519	No	No
9010	48.749	0.288	No	No		103.214	0.511	No	No
9020	18.162	0.286	0.286	18.162		94.214	0.446	No	No
9030	81.511	0.349	No	No		101.354	0.343	No	No
9040	21.525	0.279	0.279	21.525		93.419	0.493	No	No
9050	71.801	0.33	No	No		101.976	0.41	No	No
9060	56.982	0.349	No	No		86.228	0.473	No	No
9070	54.443	0.383	No	No		94.229	0.45	No	No
9080	36.924	0.317	No	No		90.423	0.408	No	No
9090	103.942	0.347	No	No		111.481	0.464	No	No
9100	69.954	0.366	No	No		109.058	0.473	No	No
9110	45.667	0.32	No	No		85.767	0.495	No	No
9120	13.674	0.281	0.281	13.674		92.409	0.48	No	No
9130	39.937	0.318	No	No		90.846	0.425	No	No
9140	23.53	0.345	0.345	23.53		93.929	0.43	No	No
9150	48.929	0.363	No	No		81.398	0.44	No	No
9160	16.685	0.324	0.324	16.685		93.86	0.489	No	No
9170	70.445	0.418	No	No		105.53	0.405	No	No
9180	55.572	0.315	No	No		101.437	0.443	No	No
9190	68.227	0.423	No	No		92.647	0.486	No	No
9200	43.768	0.291	No	No		105.954	0.401	No	No
9210	39.666	0.297	No	No		94.628	0.465	No	No
9220	71.38	0.396	No	No		93.932	0.544	No	No
9230	32.262	0.381	No	No		106.11	0.495	No	No
9240	40.529	0.327	No	No		99.208	0.504	No	No
9250	25.69	0.337	0.337	25.69		110.209	0.447	No	No
9260	55.506	0.378	No	No		113.217	0.51	No	No
9270	29.963	0.358	No	No		96.571	0.471	No	No
9280	28.329	0.312	0.312	28.329		78.651	0.503	No	No
9290	82.661	0.37	No	No		106.346	0.473	No	No
9300	63.883	0.374	No	No		90.023	0.52	No	No
9310	46.691	0.339	No	No		91.672	0.472	No	No
9320	51.748	0.325	No	No		98.062	0.534	No	No
9330	70.134	0.365	No	No		97.482	0.514	No	No
9340	71.071	0.4	No	No		92.274	0.525	No	No
9350	93.881	0.361	No	No		107.649	0.537	No	No
9360	74.918	0.324	No	No		87.181	0.496	No	No
9370	110.794	0.402	No	No		93.068	0.515	No	No
9380	74.233	0.361	No	No		84.404	0.504	No	No
9390	93.467	0.412	No	No		107.918	0.522	No	No
9400	85.415	0.328	No	No		88.544	0.457	No	No
9410	89.58	0.315	No	No		95.234	0.519	No	No
9420	37.952	0.331	No	No		96.397	0.478	No	No
9430	81.921	0.394	No	No		86.479	0.454	No	No
9440	39.507	0.343	No	No		86.923	0.494	No	No
9450	45.183	0.348	No	No		92.82	0.465	No	No
9460	73.269	0.386	No	No		87.855	0.446	No	No
9470	77.93	0.399	No	No		89.931	0.474	No	No
9480	77.786	0.35	No	No		101.432	0.353	No	No
9490	41.305	0.365	No	No		113.48	0.535	No	No
9500	67.257	0.409	No	No		106.602	0.41	No	No
9510	56.72	0.423	No	No		106.559	0.534	No	No
9520	56.347	0.357	No	No		96.449	0.413	No	No
9530	59.784	0.406	No	No		95.648	0.421	No	No
9540	72.469	0.441	No	No		87.277	0.486	No	No
9550	79.376	0.367	No	No		81.194	0.429	No	No
9560	77.908	0.326	No	No		91.351	0.454	No	No
9570	66.683	0.313	No	No		108.109	0.451	No	No
9580	96.188	0.427	No	No		96.336	0.426	No	No
9590	63.836	0.36	No	No		83.648	0.436	No	No
9600	71.534	0.356	No	No		93.325	0.434	No	No
9610	80.82	0.421	No	No		97.092	0.472	No	No
9620	63.393	0.355	No	No		77.303	0.431	No	No
9630	84.273	0.42	No	No		85.514	0.459	No	No
9640	87.785	0.386	No	No		95.756	0.516	No	No
9650	52.814	0.438	No	No		84.169	0.437	No	No
9660	82.102	0.314	No	No		99.552	0.488	No	No
9670	94.728	0.453	No	No		80.809	0.487	No	No
9680	81.414	0.286	No	No		89.128	0.452	No	No
9690	83.355	0.385	No	No		101.387	0.433	No	No
9700	62.193	0.445	No	No		92.948	0.454	No	No
9710	47.717	0.318	No	No		103.687	0.474	No	No
9720	68.34	0.392	No	No		106.865	0.525	No	No
9730	77.215	0.379	No	No		91.307	0.499	No	No
9740	80.411	0.433	No	No		93.675	0.463	No	No
9750	62.089	0.461	No	No		89.644	0.517	No	No
9760	71.655	0.399	No	No		86.734	0.507	No	No
9770	69.359	0.418	No	No		99.757	0.467	No	No
9780	71.504	0.425	No	No		93.572	0.471	No	No
9790	42.283	0.393	No	No		94.71	0.451	No	No
9800	53.723	0.397	No	No		97.516	0.486	No	No
9810	29.928	0.332	0.332	29.928		101.801	0.467	No	No
9820	51.727	0.355	No	No		92.72	0.418	No	No
9830	52.504	0.4	No	No		79.044	0.479	No	No
9840	73.051	0.416	No	No		102.019	0.445	No	No
9850	48.973	0.404	No	No		111.767	0.484	No	No
9860	29.773	0.308	0.308	29.773		108.299	0.462	No	No
9870	62.595	0.399	No	No		89.742	0.432	No	No
9880	49.249	0.368	No	No		88.198	0.439	No	No
9890	45.744	0.32	No	No		92.536	0.438	No	No
9900	55.342	0.411	No	No		89.098	0.422	No	No
9910	68.017	0.427	No	No		85.165	0.425	No	No
9920	26.072	0.302	0.302	26.072		83.614	0.417	No	No
9930	59.822	0.396	No	No		87.127	0.487	No	No
9940	63.978	0.366	No	No		89.755	0.442	No	No
9950	45.921	0.321	No	No		75.877	0.436	No	No
9960	85.002	0.4	No	No		98.053	0.466	No	No
9970	65.81	0.375	No	No		83.22	0.395	No	No
9980	26.907	0.353	No	No		86.042	0.452	No	No
9990	59.273	0.337	No	No		78.682	0.437	No	No
10000	83.034	0.366	No	No		83.515	0.381	No	No
10010	90.089	0.355	No	No		66.034	0.353	No	No
10020	89.216	0.35	No	No		82.794	0.464	No	No
10030	69.893	0.319	No	No		92.645	0.47	No	No
10040	58.445	0.316	No	No		102.865	0.536	No	No
10050	44.588	0.376	No	No		84.6	0.492	No	No
10060	52.782	0.325	No	No		94.555	0.529	No	No
10070	49.419	0.361	No	No		84.211	0.459	No	No
10080	41.099	0.333	No	No		95.793	0.477	No	No
10090	72.143	0.361	No	No		106.467	0.579	No	No
10100	77.593	0.366	No	No		89.076	0.541	No	No
10110	103.474	0.406	No	No		87.122	0.473	No	No
10120	83.416	0.373	No	No		97.555	0.533	No	No
10130	28.965	0.288	0.288	28.965		99.564	0.533	No	No
10140	63.233	0.384	No	No		93.942	0.48	No	No
10150	87.41	0.335	No	No		91.764	0.451	No	No
10160	13.474	0.319	0.319	13.474		96.448	0.455	No	No
10170	94.964	0.341	No	No		97.85	0.496	No	No
10180	97.393	0.337	No	No		104.594	0.549	No	No
10190	84.001	0.301	No	No		104.7	0.533	No	No
10200	72.785	0.344	No	No		47.723	0.422	No	No
10210	52.041	0.301	No	No		4.395	0.47	No	No
10220	95.678	0.34	No	No		107.187	0.417	No	No
10230	73.124	0.344	No	No		94.782	0.48	No	No
10240	115.896	0.37	No	No		98.004	0.59	No	No
10250	88.03	0.342	No	No		99.558	0.497	No	No
10260	66.701	0.34	No	No		83.859	0.438	No	No
10270	71.692	0.396	No	No		103.588	0.447	No	No
10280	86.316	0.379	No	No		93.756	0.519	No	No
10290	51.859	0.349	No	No		98.17	0.53	No	No
10300	74.446	0.388	No	No		103.962	0.473	No	No
10310	22.872	0.303	0.303	22.872		95.339	0.631	No	No
10320	61.848	0.36	No	No		95.033	0.494	No	No
10330	112.629	0.362	No	No		79.222	0.437	No	No
10340	79.086	0.343	No	No		80.124	0.45	No	No
10350	102.899	0.333	No	No		146.53	0.542	No	No
10360	89.777	0.378	No	No		148.726	0.412	No	No
10370	86.315	0.38	No	No		147.873	0.451	No	No
10380	74.344	0.35	No	No		157.529	0.44	No	No
10390	40.844	0.329	No	No		147.264	0.511	No	No
10400	104.297	0.346	No	No		147.708	0.389	No	No
10410	85.135	0.358	No	No		172.685	0.443	No	No
10420	79.745	0.332	No	No		146.612	0.485	No	No
10430	96.744	0.337	No	No		165.61	0.495	No	No
10440	72.915	0.302	No	No		145.564	0.518	No	No
10450	73.033	0.318	No	No		153.656	0.46	No	No
10460	50.783	0.342	No	No		156.11	0.459	No	No
10470	59.651	0.39	No	No		157.134	0.463	No	No
10480	96.202	0.327	No	No		155.081	0.479	No	No
10490	47.452	0.356	No	No		154.424	0.525	No	No
10500	76.959	0.353	No	No		150.008	0.519	No	No
10510	66.205	0.342	No	No		142.899	0.435	No	No
10520	89.96	0.345	No	No		145.607	0.457	No	No
10530	100.564	0.404	No	No		147.065	0.48	No	No
10540	88.122	0.389	No	No		156.543	0.45	No	No
10550	78.14	0.416	No	No		147.854	0.544	No	No
10560	72.955	0.366	No	No		147.002	0.47	No	No
10570	74.503	0.387	No	No		156.644	0.483	No	No
10580	77.498	0.388	No	No		144.255	0.456	No	No
10590	67.762	0.396	No	No		145.652	0.48	No	No
10600	90.487	0.392	No	No		148.212	0.519	No	No
10610	75.616	0.439	No	No		155.197	0.438	No	No
10620	26.241	0.314	0.314	26.241		136.611	0.582	No	No
10630	58.904	0.372	No	No		143.751	0.525	No	No
10640	50.131	0.373	No	No		149.654	0.561	No	No
10650	43.06	0.358	No	No		144.442	0.545	No	No
10660	87.409	0.337	No	No		139.222	0.552	No	No
10670	84.494	0.332	No	No		146.093	0.577	No	No
10680	72.386	0.33	No	No		132.389	0.55	No	No
10690	65.377	0.328	No	No		148.111	0.521	No	No
10700	82.43	0.394	No	No		152.411	0.565	No	No
10710	78.817	0.427	No	No		150.525	0.558	No	No
10720	77.159	0.399	No	No		142.926	0.54	No	No
10730	63.034	0.408	No	No		147.489	0.514	No	No
10740	75.891	0.368	No	No		148.054	0.482	No	No
10750	64.153	0.376	No	No		158.588	0.508	No	No
10760	84.18	0.396	No	No		149.189	0.518	No	No
10770	81.155	0.385	No	No		139.386	0.584	No	No
10780	50.108	0.324	No	No		149.635	0.482	No	No
10790	45.461	0.368	No	No		135.036	0.517	No	No
10800	44.032	0.405	No	No		152.801	0.566	No	No
10810	49.896	0.344	No	No		156.46	0.509	No	No
10820	27.168	0.331	0.331	27.168		146.071	0.459	No	No
10830	23.953	0.277	0.277	23.953		149.155	0.464	No	No
10840	16.886	0.314	0.314	16.886		146.764	0.444	No	No
10850	11.96	0.304	0.304	11.96		158.088	0.498	No	No
10860	5.8	0.325	0.325	5.8		154.807	0.456	No	No
10870	2.113	0.36	No	No		146.963	0.495	No	No
10880	24.52	0.398	No	No		153.106	0.541	No	No
10890	17.984	0.3	0.3	17.984		160.362	0.461	No	No
10900	60.484	0.315	No	No		146.367	0.498	No	No
10910	72.693	0.413	No	No		153.793	0.497	No	No
10920	78.362	0.385	No	No		153.573	0.513	No	No
10930	52.39	0.37	No	No		152.957	0.48	No	No
10940	11.964	0.28	0.28	11.964		160.607	0.491	No	No
10950	31.627	0.286	No	No		151.951	0.468	No	No
10960	75.839	0.359	No	No		149.131	0.429	No	No
10970	43.492	0.303	No	No		158.117	0.433	No	No
10980	95.508	0.397	No	No		152.371	0.453	No	No
10990	100.122	0.386	No	No		159.959	0.455	No	No
11000	61.93	0.379	No	No		152.284	0.491	No	No
11010	60.479	0.365	No	No		143.139	0.475	No	No
11020	62.66	0.34	No	No		158.715	0.491	No	No
11030	81.659	0.344	No	No		149.192	0.504	No	No
11040	65.378	0.399	No	No		153.238	0.512	No	No
11050	76.187	0.337	No	No		137.259	0.523	No	No
11060	60.097	0.379	No	No		150.037	0.556	No	No
11070	101.122	0.401	No	No		148.976	0.466	No	No
11080	46.247	0.407	No	No		138.369	0.488	No	No
11090	85.772	0.395	No	No		155.519	0.474	No	No
11100	80.987	0.39	No	No		154.424	0.419	No	No
11110	91.127	0.416	No	No		147.486	0.454	No	No
11120	53.794	0.409	No	No		154.332	0.433	No	No
11130	45.991	0.331	No	No		160.548	0.424	No	No
11140	55.332	0.384	No	No		145.738	0.438	No	No
11150	64.248	0.363	No	No		154.973	0.427	No	No
11160	62.008	0.341	No	No		149.87	0.487	No	No
11170	64.518	0.363	No	No		151.82	0.437	No	No
11180	53.148	0.338	No	No		156.139	0.434	No	No
11190	77.394	0.426	No	No		157.909	0.444	No	No
11200	82.955	0.394	No	No		156.102	0.425	No	No
11210	78.467	0.347	No	No		147.264	0.415	No	No
11220	97.607	0.383	No	No		147.888	0.484	No	No
11230	37.471	0.313	No	No		152.815	0.497	No	No
11240	67.404	0.349	No	No		149.357	0.436	No	No
11250	93.745	0.471	No	No		149.854	0.542	No	No
11260	53.103	0.397	No	No		158.608	0.478	No	No
11270	37.328	0.354	No	No		161.968	0.482	No	No
11280	43.687	0.37	No	No		170.061	0.48	No	No
11290	46.494	0.383	No	No		155.407	0.401	No	No
11300	31.409	0.424	No	No		156.972	0.428	No	No
11310	38.068	0.333	No	No		156.975	0.46	No	No
11320	55.722	0.325	No	No		163.28	0.432	No	No
11330	69.859	0.402	No	No		146.783	0.44	No	No
11340	20.103	0.36	No	No		159.509	0.392	No	No
11350	86.052	0.388	No	No		151.472	0.449	No	No
11360	64.54	0.375	No	No		149.811	0.46	No	No
11370	71.5	0.329	No	No		146.732	0.445	No	No
11380	103.483	0.419	No	No		169.797	0.395	No	No
11390	43.987	0.351	No	No		147.078	0.475	No	No
11400	87.261	0.319	No	No		150.57	0.484	No	No
11410	41.196	0.296	No	No		155.506	0.461	No	No
11420	69.05	0.333	No	No		154.678	0.475	No	No
11430	72.05	0.338	No	No		159.808	0.5	No	No
11440	75.796	0.345	No	No		159.164	0.463	No	No
11450	85.053	0.371	No	No		154.799	0.445	No	No
11460	72.296	0.337	No	No		147.112	0.46	No	No
11470	88.555	0.392	No	No		152.426	0.506	No	No
11480	76.98	0.339	No	No		157.743	0.467	No	No
11490	70.444	0.402	No	No		142.34	0.531	No	No
11500	61.218	0.397	No	No		147.744	0.482	No	No
11510	60.677	0.342	No	No		158.42	0.465	No	No
11520	85.999	0.412	No	No		159.697	0.464	No	No
11530	77.126	0.34	No	No		143.821	0.48	No	No
11540	64.124	0.442	No	No		157.86	0.502	No	No
11550	46.162	0.38	No	No		156.78	0.46	No	No
11560	65.359	0.303	No	No		162.849	0.452	No	No
11570	67.49	0.334	No	No		156.664	0.489	No	No
11580	77.045	0.416	No	No		147.809	0.497	No	No
11590	73.514	0.335	No	No		163.264	0.48	No	No
11600	86.54	0.394	No	No		151.443	0.493	No	No
11610	68.411	0.323	No	No		149.621	0.5	No	No
11620	46.849	0.331	No	No		172.603	0.395	No	No
11630	59.19	0.392	No	No		156.659	0.451	No	No
11640	67.672	0.391	No	No		144.396	0.474	No	No
11650	76.068	0.426	No	No		151.825	0.443	No	No
11660	58.425	0.353	No	No		148.857	0.45	No	No
11670	56.119	0.298	No	No		148.803	0.532	No	No
11680	51.604	0.353	No	No		153.673	0.495	No	No
11690	29.961	0.311	0.311	29.961		152.931	0.455	No	No
11700	78.101	0.303	No	No		149.61	0.497	No	No
11710	50.042	0.416	No	No		157.425	0.555	No	No
11720	80.536	0.365	No	No		144.161	0.549	No	No
11730	76.434	0.33	No	No		162.251	0.454	No	No
11740	87.34	0.344	No	No		143.206	0.458	No	No
11750	56.055	0.328	No	No		149.04	0.44	No	No
11760	95.12	0.37	No	No		155.497	0.498	No	No
11770	71.388	0.354	No	No		157.863	0.431	No	No
11780	81.19	0.366	No	No		162.544	0.453	No	No
11790	70.679	0.351	No	No		138.674	0.492	No	No
11800	121.54	0.345	No	No		152.646	0.504	No	No
11810	74.354	0.333	No	No		155.629	0.48	No	No
11820	58.045	0.366	No	No		146.295	0.482	No	No
11830	93.323	0.435	No	No		145.168	0.479	No	No
11840	41.888	0.332	No	No		137.424	0.524	No	No
11850	64.312	0.31	No	No		136.499	0.508	No	No
11860	63.866	0.342	No	No		144.531	0.466	No	No
11870	45.499	0.307	No	No		161.844	0.447	No	No
11880	48.127	0.324	No	No		146.661	0.481	No	No
11890	79.352	0.309	No	No		147.029	0.439	No	No
11900	72.668	0.366	No	No		133.924	0.49	No	No
11910	59.716	0.295	No	No		149.769	0.453	No	No
11920	78.092	0.417	No	No		141.734	0.479	No	No
11930	83.948	0.359	No	No		152.477	0.509	No	No
11940	19.163	0.299	0.299	19.163		142.526	0.499	No	No
11950	103.07	0.304	No	No		137.058	0.482	No	No
11960	106.504	0.348	No	No		135.764	0.544	No	No
11970	84.092	0.33	No	No		136.472	0.469	No	No
11980	36.628	0.276	No	No		147.664	0.45	No	No
11990	60.799	0.323	No	No		146.242	0.473	No	No
12000	96.717	0.407	No	No		133.011	0.501	No	No
12010	76.042	0.339	No	No		139.115	0.544	No	No
12020	70.737	0.316	No	No		129.953	0.482	No	No
12030	46.213	0.336	No	No		145.455	0.491	No	No
12040	71.1	0.29	No	No		131.177	0.482	No	No
12050	52.8	0.364	No	No		142.881	0.586	No	No
12060	72.938	0.339	No	No		134.69	0.489	No	No
12070	98.376	0.377	No	No		131.635	0.432	No	No
12080	34.884	0.308	No	No		144.654	0.443	No	No
12090	56.409	0.289	No	No		145.132	0.491	No	No
12100	94.802	0.396	No	No		150.422	0.446	No	No
12110	79.985	0.339	No	No		126.42	0.467	No	No
12120	57.311	0.324	No	No		141.157	0.47	No	No
12130	80.228	0.379	No	No		148.85	0.433	No	No
12140	67.436	0.31	No	No		151.62	0.436	No	No
12150	82.792	0.345	No	No		165.258	0.461	No	No
12160	66.823	0.286	No	No		147.086	0.483	No	No
12170	71.045	0.349	No	No		144.918	0.499	No	No
12180	96.3	0.385	No	No		149.573	0.466	No	No
12190	103.481	0.402	No	No		150.97	0.426	No	No
12200	36.823	0.312	No	No		156.304	0.398	No	No
12210	96.114	0.3	No	No		128.824	0.523	No	No
12220	82.994	0.362	No	No		145.111	0.493	No	No
12230	96.126	0.362	No	No		146.151	0.5	No	No
12240	81.464	0.362	No	No		152.769	0.423	No	No
12250	72.497	0.279	No	No		139.01	0.505	No	No
12260	99.686	0.319	No	No		144.451	0.452	No	No
12270	76.074	0.326	No	No		153.987	0.483	No	No
12280	62.117	0.321	No	No		158.065	0.471	No	No
12290	120.061	0.321	No	No		159.977	0.477	No	No
12300	76.886	0.36	No	No		161.132	0.426	No	No
12310	89.352	0.317	No	No		151.158	0.404	No	No
12320	20.402	0.291	0.291	20.402		149.135	0.458	No	No
12330	72.667	0.324	No	No		151.743	0.462	No	No
12340	90.225	0.327	No	No		154.14	0.429	No	No
12350	85.376	0.328	No	No		142.751	0.494	No	No
12360	34.684	0.294	No	No		154.545	0.45	No	No
12370	34.168	0.312	No	No		142.752	0.493	No	No
12380	83.945	0.317	No	No		145.981	0.461	No	No
12390	84.373	0.343	No	No		148.925	0.511	No	No
12400	64.138	0.351	No	No		159.256	0.437	No	No
12410	58.431	0.29	No	No		162.463	0.464	No	No
12420	77.537	0.375	No	No		142.249	0.461	No	No
12430	69.793	0.313	No	No		145.055	0.45	No	No
12440	62.231	0.292	No	No		151.285	0.475	No	No
12450	60.216	0.311	No	No		148.27	0.426	No	No
12460	98.078	0.358	No	No		159.967	0.442	No	No
12470	35.027	0.321	No	No		154.176	0.431	No	No
12480	81.036	0.321	No	No		140.904	0.485	No	No
12490	67.677	0.317	No	No		145.202	0.455	No	No
12500	44.905	0.341	No	No		153.034	0.454	No	No
12510	52.559	0.384	No	No		132.747	0.508	No	No
12520	69.384	0.428	No	No		145.781	0.484	No	No
12530	60.835	0.382	No	No		140.711	0.487	No	No
12540	94.511	0.411	No	No		161.114	0.502	No	No
12550	99.384	0.393	No	No		152.227	0.486	No	No
12560	79.598	0.338	No	No		138.356	0.546	No	No
12570	49.439	0.34	No	No		157.576	0.441	No	No
12580	68.583	0.316	No	No		156.118	0.482	No	No
12590	64.842	0.365	No	No		147.113	0.487	No	No
12600	79.793	0.395	No	No		153.22	0.432	No	No
12610	63.142	0.338	No	No		152.051	0.435	No	No
12620	46.696	0.327	No	No		167.363	0.437	No	No
12630	76.28	0.379	No	No		155.949	0.412	No	No
12640	65.316	0.33	No	No		144.965	0.493	No	No
12650	40.986	0.317	No	No		147.278	0.472	No	No
12660	44.634	0.41	No	No		148.395	0.517	No	No
12670	70.811	0.328	No	No		159.464	0.423	No	No
12680	54.734	0.35	No	No		149.896	0.455	No	No
12690	82.141	0.404	No	No		148.41	0.404	No	No
12700	58.258	0.333	No	No		153.75	0.425	No	No
12710	73.478	0.369	No	No		152.663	0.482	No	No
12720	44.172	0.319	No	No		144.203	0.47	No	No
12730	57.979	0.33	No	No		153.749	0.438	No	No
12740	59.357	0.335	No	No		150.755	0.468	No	No
12750	48.499	0.306	No	No		163.404	0.456	No	No
12760	77.261	0.348	No	No		139.185	0.455	No	No
12770	60.884	0.324	No	No		150.107	0.456	No	No
12780	55.098	0.348	No	No		154.82	0.469	No	No
12790	64.708	0.294	No	No		152.939	0.465	No	No
12800	71.239	0.332	No	No		158.238	0.445	No	No
12810	97.178	0.342	No	No		150.489	0.456	No	No
12820	61.51	0.377	No	No		147.505	0.468	No	No
12830	60.172	0.355	No	No		161.225	0.425	No	No
12840	67.806	0.363	No	No		157.432	0.434	No	No
12850	70.278	0.376	No	No		146.836	0.393	No	No
12860	83.073	0.373	No	No		145.493	0.443	No	No
12870	46.171	0.371	No	No		136.032	0.439	No	No
12880	78.519	0.38	No	No		148.971	0.464	No	No
12890	61.829	0.317	No	No		147.342	0.427	No	No
12900	67.255	0.383	No	No		144.546	0.457	No	No
12910	71.639	0.371	No	No		151.362	0.468	No	No
12920	75.304	0.357	No	No		143.042	0.495	No	No
12930	43.646	0.365	No	No		140.852	0.481	No	No
12940	42.277	0.369	No	No		150.046	0.45	No	No
12950	83.063	0.395	No	No		138.959	0.465	No	No
12960	93.945	0.377	No	No		138.698	0.453	No	No
12970	64.661	0.34	No	No		138.386	0.444	No	No
12980	58.859	0.347	No	No		146.289	0.444	No	No
12990	59.609	0.383	No	No		139.066	0.5	No	No
13000	82.82	0.352	No	No		136.465	0.489	No	No
13010	47.209	0.335	No	No		138.691	0.471	No	No
13020	56.764	0.312	No	No		140.26	0.49	No	No
13030	84.167	0.345	No	No		140.415	0.469	No	No
13040	62.14	0.367	No	No		135.921	0.529	No	No
13050	108.865	0.361	No	No		133.487	0.459	No	No
13060	61.064	0.317	No	No		147.145	0.49	No	No
13070	59.586	0.326	No	No		150.178	0.412	No	No
13080	69.465	0.311	No	No		149.831	0.489	No	No
13090	53.519	0.286	No	No		143.85	0.505	No	No
13100	43.009	0.299	No	No		134.977	0.4	No	No
13110	62.523	0.404	No	No		142.973	0.494	No	No
13120	58.797	0.346	No	No		139.671	0.422	No	No
13130	30.894	0.314	No	No		147.402	0.485	No	No
13140	69.022	0.359	No	No		149.909	0.436	No	No
13150	23.582	0.3	0.3	23.582		144.047	0.463	No	No
13160	80.297	0.34	No	No		147.897	0.449	No	No
13170	52.64	0.343	No	No		146.022	0.476	No	No
13180	78.681	0.312	No	No		147.806	0.49	No	No
13190	99.101	0.322	No	No		154.915	0.44	No	No
13200	56.538	0.325	No	No		141.638	0.44	No	No
13210	65.866	0.316	No	No		145.469	0.461	No	No
13220	40.563	0.357	No	No		163.143	0.5	No	No
13230	50.956	0.354	No	No		160.62	0.436	No	No
13240	44.576	0.318	No	No		135.22	0.452	No	No
13250	66.686	0.385	No	No		143.394	0.55	No	No
13260	73.091	0.345	No	No		143.368	0.519	No	No
13270	80.012	0.378	No	No		150.907	0.42	No	No
13280	80.941	0.427	No	No		158.903	0.423	No	No
13290	51.599	0.415	No	No		149.301	0.506	No	No
13300	46.407	0.413	No	No		148.16	0.513	No	No
13310	68.312	0.348	No	No		141.505	0.474	No	No
13320	39.794	0.378	No	No		152.093	0.514	No	No
13330	74.12	0.382	No	No		148.907	0.496	No	No
13340	77.125	0.369	No	No		147.244	0.453	No	No
13350	83.436	0.367	No	No		149.331	0.525	No	No
13360	98.597	0.367	No	No		125.151	0.479	No	No
13370	67.293	0.392	No	No		141.196	0.511	No	No
13380	67.439	0.399	No	No		148.965	0.487	No	No
13390	76.734	0.418	No	No		142.667	0.524	No	No
13400	69.504	0.413	No	No		153.576	0.507	No	No
13410	66.074	0.315	No	No		148.499	0.503	No	No
13420	52.997	0.394	No	No		140.007	0.503	No	No
13430	82.064	0.406	No	No		131.739	0.507	No	No
13440	36.006	0.362	No	No		136.325	0.465	No	No
13450	52.023	0.354	No	No		135.005	0.548	No	No
13460	66.652	0.353	No	No		146.184	0.485	No	No
13470	75.423	0.386	No	No		149.827	0.495	No	No
13480	64.856	0.402	No	No		151.786	0.479	No	No
13490	97.249	0.335	No	No		145.659	0.427	No	No
13500	59.304	0.378	No	No		151.008	0.479	No	No
13510	84.324	0.381	No	No		143.75	0.475	No	No
13520	62.2	0.379	No	No		153.242	0.486	No	No
13530	87.79	0.309	No	No		147.232	0.467	No	No
13540	27.444	0.314	0.314	27.444		149.942	0.468	No	No
13550	69.5	0.386	No	No		153.563	0.473	No	No
13560	52.927	0.403	No	No		148.246	0.506	No	No
13570	78.981	0.374	No	No		144.861	0.496	No	No
13580	73.365	0.394	No	No		138.53	0.457	No	No
13590	50.08	0.378	No	No		148.581	0.42	No	No
13600	81.929	0.429	No	No		138.123	0.455	No	No
13610	66.944	0.327	No	No		142.055	0.474	No	No
13620	73.545	0.406	No	No		148.728	0.459	No	No
13630	77.516	0.383	No	No		152.229	0.455	No	No
13640	87.361	0.354	No	No		150.82	0.507	No	No
13650	53.574	0.357	No	No		147.797	0.461	No	No
13660	108.796	0.386	No	No		152.849	0.483	No	No
13670	77.525	0.406	No	No		140.083	0.454	No	No
13680	53.255	0.394	No	No		135.939	0.507	No	No
13690	33.905	0.288	No	No		127.216	0.51	No	No
13700	71.122	0.322	No	No		151.459	0.479	No	No
13710	73.919	0.379	No	No		156.266	0.45	No	No
13720	76.614	0.413	No	No		151.969	0.469	No	No
13730	79.325	0.332	No	No		159.551	0.504	No	No
13740	87.442	0.395	No	No		145.958	0.469	No	No
13750	76.752	0.37	No	No		145.3	0.502	No	No
13760	57.282	0.371	No	No		147.616	0.428	No	No
13770	54.047	0.358	No	No		130.933	0.464	No	No
13780	43.052	0.351	No	No		141.242	0.487	No	No
13790	61.164	0.354	No	No		145.499	0.439	No	No
13800	53.564	0.32	No	No		150.107	0.492	No	No
13810	76.272	0.347	No	No		145.721	0.476	No	No
13820	48.133	0.376	No	No		148.262	0.442	No	No
13830	69.326	0.408	No	No		148.729	0.431	No	No
13840	57.829	0.336	No	No		147.426	0.434	No	No
13850	68.763	0.356	No	No		150.427	0.413	No	No
13860	73.403	0.396	No	No		143.842	0.457	No	No
13870	59.225	0.355	No	No		153.008	0.449	No	No
13880	93.335	0.419	No	No		148.334	0.46	No	No
13890	30.935	0.297	No	No		126.762	0.47	No	No
13900	79.31	0.344	No	No		147.775	0.477	No	No
13910	82.254	0.374	No	No		160.972	0.421	No	No
13920	78.596	0.426	No	No		132.195	0.476	No	No
13930	41.585	0.355	No	No		153.183	0.476	No	No
13940	71.559	0.423	No	No		165.295	0.414	No	No
13950	70.728	0.383	No	No		153.355	0.439	No	No
13960	43.668	0.343	No	No		153.357	0.441	No	No
13970	70.265	0.38	No	No		155.885	0.452	No	No
13980	58.473	0.394	No	No		162.139	0.439	No	No
13990	58.826	0.368	No	No		151.877	0.511	No	No
14000	42.529	0.338	No	No		166.248	0.47	No	No
14010	51.003	0.342	No	No		147.139	0.436	No	No
14020	39.482	0.298	No	No		150.05	0.503	No	No
14030	72.037	0.345	No	No		142.242	0.484	No	No
14040	62.437	0.381	No	No		145.875	0.466	No	No
14050	59.284	0.32	No	No		136.974	0.523	No	No
14060	58.287	0.343	No	No		131.404	0.501	No	No
14070	76.87	0.337	No	No		136.024	0.548	No	No
14080	99.123	0.349	No	No		155.925	0.485	No	No
14090	24.88	0.325	0.325	24.88		147.405	0.494	No	No
14100	89.565	0.378	No	No		155.046	0.448	No	No
14110	48.489	0.307	No	No		162.711	0.452	No	No
14120	95.378	0.368	No	No		159.567	0.493	No	No
14130	68.586	0.288	No	No		140.96	0.529	No	No
14140	74.232	0.345	No	No		142.64	0.533	No	No
14150	40.779	0.313	No	No		146.529	0.487	No	No
14160	96.675	0.316	No	No		157.177	0.546	No	No
14170	90.083	0.385	No	No		152.269	0.492	No	No
14180	58.159	0.338	No	No		163.819	0.424	No	No
14190	38.342	0.325	No	No		141.37	0.433	No	No
14200	40.035	0.288	No	No		130.589	0.473	No	No
14210	60.58	0.33	No	No		146.46	0.46	No	No
14220	61.877	0.313	No	No		154.673	0.503	No	No
14230	69.202	0.338	No	No		138.204	0.479	No	No
14240	52.841	0.408	No	No		156.428	0.509	No	No
14250	85.05	0.417	No	No		159.694	0.499	No	No
14260	63.43	0.349	No	No		153.169	0.419	No	No
14270	55.037	0.324	No	No		154.97	0.513	No	No
14280	69.334	0.377	No	No		143.296	0.589	No	No
14290	44.542	0.298	No	No		154.845	0.522	No	No
14300	73.912	0.329	No	No		147.025	0.48	No	No
14310	82.164	0.365	No	No		147.917	0.537	No	No
14320	54.642	0.345	No	No		146.586	0.55	No	No
14330	66.427	0.336	No	No		144.18	0.48	No	No
14340	68.595	0.333	No	No		158.417	0.423	No	No
14350	40.597	0.356	No	No		141.485	0.464	No	No
14360	111.368	0.357	No	No		139.986	0.418	No	No
14370	91.914	0.39	No	No		138.674	0.464	No	No
14380	77.58	0.298	No	No		143.503	0.538	No	No
14390	67.537	0.337	No	No		147.88	0.504	No	No
14400	78.798	0.299	No	No		150.007	0.436	No	No
14410	73.89	0.367	No	No		143.576	0.488	No	No
14420	56.081	0.356	No	No		140.849	0.492	No	No
14430	69.62	0.4	No	No		147.959	0.479	No	No
14440	35.585	0.401	No	No		141.279	0.503	No	No
14450	83.339	0.391	No	No		158.597	0.486	No	No
14460	57.128	0.375	No	No		156.583	0.494	No	No
14470	83.175	0.37	No	No		146.531	0.455	No	No
14480	84.181	0.337	No	No		147.199	0.49	No	No
14490	51.884	0.327	No	No		145.971	0.48	No	No
14500	78.224	0.398	No	No		140.237	0.504	No	No
14510	68.248	0.334	No	No		127.501	0.527	No	No
14520	68.656	0.367	No	No		156.857	0.47	No	No
14530	69.808	0.315	No	No		134.57	0.434	No	No
14540	91.091	0.361	No	No		156.973	0.454	No	No
14550	95.802	0.381	No	No		147.268	0.461	No	No
14560	96.469	0.356	No	No		149.297	0.509	No	No
14570	109.837	0.375	No	No		146.351	0.48	No	No
14580	75.475	0.32	No	No		132.615	0.489	No	No
14590	83.926	0.352	No	No		144.604	0.485	No	No
14600	65.324	0.355	No	No		137.63	0.455	No	No
14610	76.283	0.319	No	No		146.161	0.448	No	No
14620	85.129	0.382	No	No		147.455	0.477	No	No
14630	79.382	0.326	No	No		138.626	0.464	No	No
14640	49.875	0.286	No	No		135.046	0.451	No	No
14650	91.128	0.32	No	No		147.71	0.48	No	No
14660	119.024	0.384	No	No		151.983	0.433	No	No
14670	107.416	0.424	No	No		151.202	0.496	No	No
14680	75.837	0.377	No	No		135.508	0.475	No	No
14690	86.125	0.316	No	No		140.549	0.489	No	No
14700	106.041	0.376	No	No		133.085	0.472	No	No
14710	98.297	0.353	No	No		126.466	0.445	No	No
14720	74.318	0.329	No	No		145.737	0.484	No	No
14730	70.075	0.337	No	No		145.553	0.474	No	No
14740	79.517	0.374	No	No		146.82	0.441	No	No
14750	92.399	0.354	No	No		139.656	0.454	No	No
14760	97.322	0.341	No	No		145.877	0.462	No	No
14770	41.876	0.331	No	No		143.437	0.444	No	No
14780	104.633	0.382	No	No		147.29	0.409	No	No
14790	86.135	0.406	No	No		155.843	0.428	No	No
14800	94.995	0.339	No	No		132.077	0.433	No	No
14810	91.625	0.373	No	No		143.814	0.443	No	No
14820	70.123	0.363	No	No		127.522	0.448	No	No
14830	95.976	0.393	No	No		139.075	0.489	No	No
14840	90.257	0.372	No	No		149.265	0.469	No	No
14850	88.604	0.371	No	No		149.827	0.453	No	No
14860	97.603	0.366	No	No		137.894	0.467	No	No
14870	79.971	0.377	No	No		148.535	0.432	No	No
14880	62.851	0.335	No	No		143.533	0.418	No	No
14890	40.077	0.361	No	No		151.278	0.499	No	No
14900	92.44	0.406	No	No		153.139	0.495	No	No
14910	89.835	0.367	No	No		138.601	0.479	No	No
14920	74.959	0.341	No	No		166.269	0.454	No	No
14930	90.746	0.382	No	No		141.914	0.562	No	No
14940	80.916	0.373	No	No		153.965	0.467	No	No
14950	109.337	0.335	No	No		147.04	0.533	No	No
14960	74.594	0.359	No	No		137.253	0.474	No	No
14970	84.809	0.354	No	No		130.76	0.487	No	No
14980	89.767	0.351	No	No		140.004	0.474	No	No
14990	59.689	0.351	No	No		134.763	0.412	No	No
15000	83.359	0.404	No	No		161.902	0.486	No	No
15010	71.037	0.284	No	No		144.013	0.461	No	No
15020	70.602	0.348	No	No		141.893	0.458	No	No
15030	86.287	0.384	No	No		140.184	0.446	No	No
15040	82.898	0.363	No	No		140.815	0.434	No	No
15050	38.852	0.289	No	No		151.312	0.473	No	No
15060	79.938	0.342	No	No		159.648	0.457	No	No
15070	77.411	0.332	No	No		142.738	0.452	No	No
15080	24.338	0.285	0.285	24.338		147.314	0.414	No	No
15090	86.539	0.375	No	No		155.774	0.426	No	No
15100	77.4	0.293	No	No		141.978	0.451	No	No
15110	84.98	0.315	No	No		149.899	0.44	No	No
15120	87.139	0.333	No	No		137.893	0.478	No	No
15130	85.827	0.365	No	No		142.832	0.473	No	No
15140	65.207	0.35	No	No		158.768	0.42	No	No
15150	49.673	0.311	No	No		149.469	0.456	No	No
15160	90.629	0.33	No	No		149.464	0.502	No	No
15170	72.351	0.375	No	No		156.941	0.502	No	No
15180	80.01	0.375	No	No		168.422	0.476	No	No
15190	62.303	0.33	No	No		166.154	0.462	No	No
15200	91.902	0.398	No	No		150.813	0.505	No	No
15210	93.056	0.359	No	No		146.525	0.454	No	No
15220	84.089	0.351	No	No		149.249	0.409	No	No
15230	66.288	0.392	No	No		145.941	0.43	No	No
15240	37.866	0.316	No	No		148.889	0.422	No	No
15250	45.793	0.313	No	No		152.788	0.473	No	No
15260	43.84	0.317	No	No		149.086	0.491	No	No
15270	71.481	0.345	No	No		144.317	0.454	No	No
15280	79.604	0.356	No	No		153.265	0.488	No	No
15290	59.704	0.369	No	No		172.83	0.433	No	No
15300	53.898	0.411	No	No		140.363	0.446	No	No
15310	76.794	0.408	No	No		144.731	0.43	No	No
15320	75.421	0.354	No	No		140.352	0.498	No	No
15330	79.363	0.366	No	No		132.592	0.47	No	No
15340	87.527	0.378	No	No		152.271	0.467	No	No
15350	65.802	0.329	No	No		156.075	0.484	No	No
15360	76.359	0.286	No	No		152.037	0.43	No	No
15370	87.165	0.407	No	No		149.673	0.452	No	No
15380	86.528	0.352	No	No		140.902	0.465	No	No
15390	54.024	0.37	No	No		143.236	0.447	No	No
15400	108.21	0.335	No	No		143.566	0.471	No	No
15410	92.45	0.37	No	No		137.656	0.467	No	No
15420	84.572	0.363	No	No		153.098	0.479	No	No
15430	77.819	0.378	No	No		147.82	0.443	No	No
15440	69.624	0.355	No	No		151.797	0.426	No	No
15450	68.307	0.341	No	No		161.942	0.466	No	No
15460	92.985	0.408	No	No		154.042	0.456	No	No
15470	79.628	0.328	No	No		151.575	0.411	No	No
15480	87.226	0.352	No	No		145.712	0.469	No	No
15490	103.915	0.389	No	No		142.871	0.444	No	No
15500	59.21	0.313	No	No		139.838	0.466	No	No
15510	76.076	0.318	No	No		156.649	0.456	No	No
15520	73.964	0.37	No	No		143.934	0.422	No	No
15530	72.818	0.313	No	No		139.906	0.48	No	No
15540	59.556	0.416	No	No		149.114	0.498	No	No
15550	77.834	0.326	No	No		147.022	0.44	No	No
15560	80.188	0.358	No	No		154.951	0.453	No	No
15570	90.631	0.424	No	No		137.36	0.472	No	No
15580	87.346	0.361	No	No		144.228	0.431	No	No
15590	87.768	0.338	No	No		158.101	0.472	No	No
15600	73.201	0.383	No	No		148.213	0.455	No	No
15610	82.829	0.35	No	No		136.47	0.425	No	No
15620	63.862	0.369	No	No		129.728	0.458	No	No
15630	74.699	0.322	No	No		147.405	0.403	No	No
15640	81.248	0.374	No	No		148.616	0.448	No	No
15650	71.34	0.398	No	No		146.085	0.476	No	No
15660	94.888	0.36	No	No		151.465	0.492	No	No
15670	89.793	0.33	No	No		145.124	0.471	No	No
15680	73.145	0.389	No	No		136.516	0.529	No	No
15690	82.731	0.387	No	No		149.203	0.502	No	No
15700	100.514	0.417	No	No		150.763	0.47	No	No
15710	63.426	0.332	No	No		146.628	0.471	No	No
15720	67.901	0.354	No	No		162.462	0.505	No	No
15730	74.901	0.397	No	No		155.811	0.444	No	No
15740	84.281	0.397	No	No		154.396	0.521	No	No
15750	68.407	0.342	No	No		153.38	0.535	No	No
15760	92.701	0.344	No	No		157.616	0.473	No	No
15770	87.649	0.392	No	No		149.224	0.487	No	No
15780	113.7	0.369	No	No		155.638	0.456	No	No
15790	96.697	0.347	No	No		154.373	0.389	No	No
15800	84.216	0.362	No	No		162.239	0.488	No	No
15810	86.747	0.354	No	No		149.036	0.454	No	No
15820	104.995	0.334	No	No		157.011	0.484	No	No
15830	102.068	0.352	No	No		156.736	0.494	No	No
15840	105.285	0.383	No	No		160.033	0.471	No	No
15850	86.31	0.362	No	No		142.785	0.475	No	No
15860	91.686	0.35	No	No		168.501	0.421	No	No
15870	61.404	0.346	No	No		150.96	0.461	No	No
15880	78.379	0.309	No	No		144.412	0.475	No	No
15890	77.578	0.414	No	No		150.158	0.45	No	No
15900	95.81	0.329	No	No		159.434	0.429	No	No
15910	81.511	0.388	No	No		146.768	0.455	No	No
15920	82.785	0.323	No	No		159.675	0.421	No	No
15930	82.274	0.369	No	No		160.541	0.458	No	No
15940	88.377	0.395	No	No		160.899	0.526	No	No
15950	89.994	0.401	No	No		161.515	0.462	No	No
15960	64.37	0.386	No	No		157.144	0.456	No	No
15970	79.977	0.39	No	No		148.907	0.417	No	No
15980	68.299	0.353	No	No		154.119	0.465	No	No
15990	76.938	0.387	No	No		154.538	0.411	No	No
16000	94.325	0.373	No	No		152.289	0.564	No	No
16010	74.293	0.325	No	No		146.96	0.426	No	No
16020	79.823	0.394	No	No		149.487	0.43	No	No
16030	85.699	0.316	No	No		166.753	0.43	No	No
16040	62.923	0.331	No	No		152.372	0.411	No	No
16050	65.371	0.354	No	No		153.879	0.417	No	No
16060	102.416	0.355	No	No		167.176	0.457	No	No
16070	67.982	0.391	No	No		166.055	0.433	No	No
16080	69.81	0.316	No	No		168.792	0.442	No	No
16090	53.425	0.312	No	No		163.326	0.42	No	No
16100	31.484	0.396	No	No		164.697	0.392	No	No
16110	69.455	0.369	No	No		168.132	0.435	No	No
16120	75.489	0.337	No	No		165.721	0.398	No	No
16130	84.589	0.362	No	No		175.526	0.462	No	No
16140	81.706	0.426	No	No		162.146	0.39	No	No
16150	59.969	0.373	No	No		168.436	0.413	No	No
16160	88.65	0.364	No	No		156.16	0.418	No	No
16170	73.228	0.302	No	No		157.43	0.413	No	No
16180	83.169	0.388	No	No		156.714	0.385	No	No
16190	76.661	0.354	No	No		157.947	0.412	No	No
16200	61.076	0.395	No	No		154.813	0.465	No	No
16210	49.569	0.391	No	No		160.761	0.49	No	No
16220	28.412	0.399	No	No		158.988	0.477	No	No
16230	74.279	0.392	No	No		154.817	0.523	No	No
16240	75.723	0.41	No	No		149.496	0.574	No	No
16250	59.786	0.393	No	No		156.332	0.456	No	No
16260	75.684	0.366	No	No		143.648	0.521	No	No
16270	48.429	0.337	No	No		162.103	0.492	No	No
16280	61.085	0.324	No	No		151.731	0.451	No	No
16290	89.002	0.435	No	No		157.593	0.472	No	No
16300	38.308	0.343	No	No		151.771	0.416	No	No
16310	67.028	0.345	No	No		144.208	0.48	No	No
16320	55.039	0.321	No	No		150.175	0.435	No	No
16330	77.089	0.335	No	No		149.21	0.424	No	No
16340	69.6	0.383	No	No		164.647	0.413	No	No
16350	57.987	0.355	No	No		156.992	0.424	No	No
16360	89.869	0.371	No	No		155.231	0.429	No	No
16370	42.85	0.352	No	No		161.58	0.469	No	No
16380	49.013	0.358	No	No		165.458	0.43	No	No
16390	47.127	0.372	No	No		163.004	0.447	No	No
16400	40.391	0.332	No	No		168.813	0.426	No	No
16410	63.425	0.355	No	No		154.633	0.483	No	No
16420	61.779	0.363	No	No		163.131	0.436	No	No
16430	82.427	0.415	No	No		154.418	0.459	No	No
16440	67.403	0.332	No	No		151.364	0.473	No	No
16450	41.42	0.336	No	No		173.389	0.434	No	No
16460	54.668	0.323	No	No		161.678	0.441	No	No
16470	43.942	0.35	No	No		162.129	0.443	No	No
16480	74.452	0.404	No	No		137.546	0.437	No	No
16490	62.655	0.356	No	No		133.15	0.45	No	No
16500	52.616	0.38	No	No		148.909	0.416	No	No
16510	75.851	0.381	No	No		164.44	0.428	No	No
16520	57.39	0.394	No	No		159.96	0.466	No	No
16530	30.808	0.329	No	No		141.932	0.481	No	No
16540	56.773	0.376	No	No		160.563	0.508	No	No
16550	58.87	0.35	No	No		163.016	0.434	No	No
16560	88.497	0.336	No	No		154.955	0.43	No	No
16570	74.067	0.315	No	No		160.464	0.44	No	No
16580	76.454	0.342	No	No		144.552	0.483	No	No
16590	53.522	0.323	No	No		154.593	0.458	No	No
16600	40.663	0.295	No	No		169.055	0.489	No	No
16610	76.857	0.339	No	No		148.393	0.489	No	No
16620	82.031	0.385	No	No		151.494	0.487	No	No
16630	52.45	0.352	No	No		151.606	0.431	No	No
16640	52.055	0.365	No	No		161.133	0.455	No	No
16650	60.63	0.373	No	No		156.245	0.439	No	No
16660	44.817	0.341	No	No		132.04	0.393	No	No
16670	54.851	0.336	No	No		148.655	0.488	No	No
16680	64.642	0.339	No	No		143.108	0.465	No	No
16690	60.605	0.33	No	No		156.694	0.496	No	No
16700	61.192	0.368	No	No		148.727	0.41	No	No
16710	44.698	0.353	No	No		150.587	0.441	No	No
16720	59.397	0.351	No	No		164.329	0.509	No	No
16730	55.017	0.378	No	No		156.333	0.473	No	No
16740	51.987	0.375	No	No		163.513	0.475	No	No
16750	54.422	0.297	No	No		156.85	0.488	No	No
16760	64.699	0.326	No	No		146.911	0.525	No	No
16770	44.55	0.36	No	No		153.54	0.47	No	No
16780	68.122	0.337	No	No		153.483	0.456	No	No
16790	26.586	0.29	0.29	26.586		164.62	0.447	No	No
16800	27.841	0.313	0.313	27.841		164.45	0.484	No	No
16810	64.885	0.354	No	No		165.122	0.42	No	No
16820	33.161	0.357	No	No		150.853	0.42	No	No
16830	74.456	0.392	No	No		162.792	0.457	No	No
16840	52.961	0.321	No	No		156.972	0.451	No	No
16850	90.109	0.352	No	No		145.54	0.509	No	No
16860	68.803	0.368	No	No		153.4	0.501	No	No
16870	73.64	0.321	No	No		159.944	0.433	No	No
16880	75.476	0.391	No	No		156.662	0.483	No	No
16890	11.984	0.321	0.321	11.984		156.442	0.478	No	No
16900	46.599	0.304	No	No		172.435	0.476	No	No
16910	32.112	0.333	No	No		148.991	0.449	No	No
16920	80.21	0.361	No	No		157.051	0.461	No	No
16930	33.617	0.274	No	No		156.398	0.504	No	No
16940	20.355	0.286	0.286	20.355		162.66	0.47	No	No
16950	24.691	0.304	0.304	24.691		144.858	0.442	No	No
16960	51.09	0.378	No	No		149.821	0.452	No	No
16970	63.36	0.33	No	No		151.171	0.462	No	No
16980	84.207	0.316	No	No		147.013	0.502	No	No
16990	52.568	0.332	No	No		162.206	0.506	No	No
17000	40.904	0.291	No	No		152.852	0.449	No	No
17010	91.205	0.345	No	No		156.249	0.452	No	No
17020	39.827	0.301	No	No		152.991	0.462	No	No
17030	77.513	0.302	No	No		155.979	0.476	No	No
17040	82.593	0.352	No	No		143.041	0.492	No	No
17050	76.922	0.349	No	No		167.242	0.433	No	No
17060	92.143	0.328	No	No		148.443	0.433	No	No
17070	23.286	0.287	0.287	23.286		166.606	0.454	No	No
17080	39.765	0.307	No	No		161.306	0.418	No	No
17090	31.295	0.327	No	No		169.494	0.399	No	No
17100	99.709	0.297	No	No		171.818	0.472	No	No
17110	103.747	0.353	No	No		162.086	0.432	No	No
17120	72.504	0.287	No	No		150.04	0.386	No	No
17130	80.302	0.312	No	No		148.585	0.484	No	No
17140	102.131	0.325	No	No		165.464	0.426	No	No
17150	92.616	0.394	No	No		145.555	0.505	No	No
17160	42.221	0.292	No	No		160.113	0.433	No	No
17170	71.401	0.371	No	No		161.168	0.457	No	No
17180	66.393	0.315	No	No		161.181	0.405	No	No
17190	57.772	0.302	No	No		149.354	0.428	No	No
17200	50.603	0.288	No	No		169.314	0.411	No	No
17210	81.652	0.295	No	No		156.51	0.519	No	No
17220	103.758	0.32	No	No		164.21	0.461	No	No
17230	97.13	0.312	No	No		165.095	0.432	No	No
17240	45.902	0.319	No	No		155.816	0.423	No	No
17250	89.102	0.317	No	No		141.931	0.454	No	No
17260	76.901	0.31	No	No		156.888	0.451	No	No
17270	91.101	0.356	No	No		165.769	0.39	No	No
17280	60.371	0.335	No	No		155.068	0.481	No	No
17290	95.435	0.28	No	No		162.987	0.458	No	No
17300	101.686	0.368	No	No		150.442	0.457	No	No
17310	96.961	0.346	No	No		149.795	0.461	No	No
17320	94.934	0.32	No	No		153.389	0.47	No	No
17330	63.384	0.314	No	No		167.74	0.467	No	No
17340	101.911	0.39	No	No		153.138	0.461	No	No
17350	84.78	0.329	No	No		165.337	0.472	No	No
17360	82.339	0.337	No	No		163.278	0.463	No	No
17370	28.239	0.259	0.259	28.239		155.095	0.531	No	No
17380	104.459	0.376	No	No		147.541	0.485	No	No
17390	82.553	0.339	No	No		148.357	0.486	No	No
17400	105.272	0.324	No	No		157.199	0.481	No	No
17410	47.921	0.295	No	No		157.796	0.525	No	No
17420	71.823	0.312	No	No		149.407	0.498	No	No
17430	72.105	0.326	No	No		164.101	0.452	No	No
17440	49.406	0.39	No	No		147.507	0.511	No	No
17450	24.401	0.288	0.288	24.401		153.591	0.486	No	No
17460	76.044	0.336	No	No		146.562	0.423	No	No
17470	54.203	0.288	No	No		158.595	0.414	No	No
17480	60.067	0.337	No	No		152.592	0.446	No	No
17490	91.58	0.331	No	No		151.293	0.427	No	No
17500	61.885	0.295	No	No		149.993	0.433	No	No
17510	60.499	0.289	No	No		151.827	0.431	No	No
17520	74.978	0.362	No	No		142.83	0.448	No	No
17530	70.083	0.286	No	No		150.888	0.473	No	No
17540	99.827	0.331	No	No		151.992	0.417	No	No
17550	67.945	0.308	No	No		148.168	0.457	No	No
17560	61.865	0.303	No	No		132.046	0.463	No	No
17570	74.834	0.295	No	No		161.538	0.462	No	No
17580	72.784	0.332	No	No		149.173	0.473	No	No
17590	88.018	0.287	No	No		144.877	0.448	No	No
17600	83.376	0.317	No	No		148.792	0.469	No	No
17610	99.636	0.296	No	No		150.665	0.388	No	No
17620	80.142	0.295	No	No		151.122	0.419	No	No
17630	77.723	0.394	No	No		150.311	0.458	No	No
17640	87.42	0.352	No	No		155.359	0.46	No	No
17650	65.273	0.328	No	No		158.2	0.452	No	No
17660	68.844	0.311	No	No		159.582	0.496	No	No
17670	85.318	0.296	No	No		144.488	0.471	No	No
17680	79.126	0.325	No	No		146.786	0.468	No	No
17690	32.837	0.272	No	No		150.011	0.496	No	No
17700	64.892	0.302	No	No		146.411	0.452	No	No
17710	101.923	0.279	No	No		157.992	0.471	No	No
17720	46.479	0.326	No	No		146.61	0.507	No	No
17730	118.827	0.328	No	No		150.848	0.47	No	No
17740	61.733	0.328	No	No		148.622	0.445	No	No
17750	70.944	0.305	No	No		153.437	0.451	No	No
17760	101.923	0.375	No	No		137.963	0.508	No	No
17770	86.904	0.334	No	No		148.28	0.425	No	No
17780	81.313	0.346	No	No		150.892	0.503	No	No
17790	122.913	0.347	No	No		142.804	0.474	No	No
17800	99.763	0.329	No	No		142.999	0.462	No	No
17810	76.508	0.295	No	No		142.652	0.462	No	No
17820	105.362	0.342	No	No		148.03	0.458	No	No
17830	98.051	0.34	No	No		151.359	0.466	No	No
17840	82.765	0.297	No	No		147.535	0.467	No	No
17850	97.26	0.325	No	No		147.852	0.463	No	No
17860	62.544	0.313	No	No		154.576	0.496	No	No
17870	88.854	0.336	No	No		144.406	0.46	No	No
17880	64.186	0.273	No	No		139.803	0.485	No	No
17890	85.805	0.293	No	No		147.346	0.556	No	No
17900	59.752	0.29	No	No		146.817	0.477	No	No
17910	71.466	0.32	No	No		148.498	0.444	No	No
17920	103.713	0.318	No	No		145.265	0.454	No	No
17930	65.693	0.328	No	No		138.376	0.426	No	No
17940	92.346	0.314	No	No		157.358	0.429	No	No
17950	107.133	0.334	No	No		147.756	0.45	No	No
17960	103.544	0.348	No	No		153.114	0.458	No	No
17970	87.302	0.343	No	No		157.993	0.421	No	No
17980	85.831	0.348	No	No		149.961	0.469	No	No
17990	103.377	0.363	No	No		145.599	0.5	No	No
18000	32.553	0.291	No	No		142.905	0.475	No	No
18010	72.873	0.31	No	No		147.178	0.463	No	No
18020	92.704	0.341	No	No		153.544	0.443	No	No
18030	104.036	0.314	No	No		159.426	0.448	No	No
18040	78.378	0.295	No	No		139.483	0.466	No	No
18050	40.804	0.291	No	No		156.929	0.494	No	No
18060	102.833	0.362	No	No		136.849	0.498	No	No
18070	21.515	0.303	0.303	21.515		144.835	0.469	No	No
18080	93.711	0.35	No	No		151.486	0.474	No	No
18090	81.412	0.328	No	No		142.017	0.496	No	No
18100	60.609	0.303	No	No		147.729	0.455	No	No
18110	52.235	0.337	No	No		149.811	0.439	No	No
18120	92.355	0.393	No	No		145.734	0.496	No	No
18130	77.464	0.467	No	No		142.798	0.441	No	No
18140	99.05	0.339	No	No		139.948	0.501	No	No
18150	59.181	0.361	No	No		151.145	0.444	No	No
18160	78.597	0.356	No	No		142.696	0.474	No	No
18170	46.846	0.309	No	No		154.031	0.477	No	No
18180	88.113	0.4	No	No		146.965	0.531	No	No
18190	107.627	0.392	No	No		156.798	0.506	No	No
18200	72.826	0.315	No	No		152.994	0.476	No	No
18210	68.618	0.332	No	No		131.46	0.456	No	No
18220	49.351	0.303	No	No		141.837	0.491	No	No
18230	90.217	0.348	No	No		141.55	0.487	No	No
18240	63.37	0.309	No	No		141.162	0.457	No	No
18250	53.215	0.316	No	No		142.947	0.543	No	No
18260	98.436	0.303	No	No		143.547	0.449	No	No
18270	76.62	0.339	No	No		150.486	0.449	No	No
18280	101.024	0.339	No	No		147.544	0.47	No	No
18290	69.12	0.341	No	No		136.825	0.47	No	No
18300	65.702	0.302	No	No		149.946	0.527	No	No
18310	66.467	0.321	No	No		135.883	0.561	No	No
18320	80.8	0.298	No	No		144.108	0.463	No	No
18330	67.219	0.317	No	No		132.446	0.511	No	No
18340	65.988	0.341	No	No		152.371	0.464	No	No
18350	109.254	0.323	No	No		132.293	0.565	No	No
18360	48.267	0.307	No	No		144.548	0.478	No	No
18370	103.943	0.356	No	No		150.682	0.495	No	No
18380	52.297	0.322	No	No		148.863	0.465	No	No
18390	53.85	0.312	No	No		154.156	0.464	No	No
18400	95.381	0.386	No	No		150.826	0.431	No	No
18410	89.875	0.349	No	No		152.67	0.457	No	No
18420	95.513	0.34	No	No		142.367	0.504	No	No
18430	90.023	0.349	No	No		168.656	0.477	No	No
18440	56.883	0.314	No	No		140.382	0.47	No	No
18450	94.869	0.318	No	No		148.121	0.475	No	No
18460	83.44	0.354	No	No		160.898	0.434	No	No
18470	73.354	0.332	No	No		135.459	0.466	No	No
18480	82.897	0.357	No	No		132.477	0.498	No	No
18490	97.807	0.374	No	No		148.468	0.519	No	No
18500	70.048	0.413	No	No		140.365	0.495	No	No
18510	83.312	0.365	No	No		140.42	0.486	No	No
18520	85.289	0.335	No	No		163.714	0.493	No	No
18530	103.392	0.355	No	No		141.741	0.495	No	No
18540	54.77	0.306	No	No		148.725	0.469	No	No
18550	49.159	0.306	No	No		145.249	0.425	No	No
18560	49.732	0.286	No	No		155.647	0.461	No	No
18570	78.584	0.314	No	No		145.346	0.491	No	No
18580	97.883	0.348	No	No		162.799	0.426	No	No
18590	79.908	0.34	No	No		140.112	0.461	No	No
18600	59.551	0.311	No	No		147.697	0.516	No	No
18610	48.475	0.306	No	No		164.91	0.51	No	No
18620	74.778	0.418	No	No		141.849	0.466	No	No
18630	110.048	0.364	No	No		151.952	0.487	No	No
18640	68.382	0.351	No	No		146.687	0.512	No	No
18650	69.431	0.353	No	No		148.077	0.456	No	No
18660	100.222	0.324	No	No		152.189	0.461	No	No
18670	75.26	0.342	No	No		152.608	0.481	No	No
18680	81.794	0.324	No	No		155.64	0.459	No	No
18690	81.579	0.425	No	No		145.121	0.517	No	No
18700	88.22	0.387	No	No		159.798	0.444	No	No
18710	89.401	0.388	No	No		155.337	0.489	No	No
18720	95.431	0.329	No	No		156.775	0.427	No	No
18730	121.417	0.402	No	No		135.8	0.481	No	No
18740	94.457	0.369	No	No		150.562	0.474	No	No
18750	83.444	0.434	No	No		141.114	0.488	No	No
18760	75.782	0.371	No	No		162.795	0.504	No	No
18770	82.277	0.362	No	No		156.911	0.465	No	No
18780	98.948	0.395	No	No		161.108	0.486	No	No
18790	69.857	0.381	No	No		153.103	0.458	No	No
18800	106.33	0.418	No	No		148.391	0.499	No	No
18810	99.448	0.407	No	No		165.105	0.424	No	No
18820	98.681	0.394	No	No		145.456	0.447	No	No
18830	77.826	0.348	No	No		154.051	0.396	No	No
18840	61.02	0.352	No	No		155.059	0.468	No	No
18850	58.78	0.347	No	No		142.843	0.501	No	No
18860	51.498	0.332	No	No		147.408	0.448	No	No
18870	88.92	0.438	No	No		143.051	0.467	No	No
18880	78.887	0.374	No	No		146.144	0.441	No	No
18890	77.004	0.358	No	No		144.517	0.489	No	No
18900	81.567	0.374	No	No		145.297	0.513	No	No
18910	71.937	0.394	No	No		139.864	0.469	No	No
18920	65.246	0.334	No	No		147.433	0.474	No	No
18930	72.879	0.36	No	No		159.843	0.456	No	No
18940	68.996	0.377	No	No		166.736	0.463	No	No
18950	83.185	0.394	No	No		148.269	0.438	No	No
18960	45.952	0.322	No	No		149.837	0.447	No	No
18970	82.942	0.346	No	No		156.851	0.47	No	No
18980	71.805	0.391	No	No		153.231	0.472	No	No
18990	75.666	0.41	No	No		157.275	0.505	No	No
19000	69.542	0.4	No	No		148.155	0.479	No	No
19010	35.862	0.282	No	No		155.987	0.46	No	No
19020	81.405	0.357	No	No		147.39	0.504	No	No
19030	80.481	0.362	No	No		145.2	0.472	No	No
19040	65.342	0.369	No	No		145.423	0.505	No	No
19050	67.843	0.415	No	No		159.04	0.447	No	No
19060	73.273	0.427	No	No		149.313	0.476	No	No
19070	52.578	0.328	No	No		149.618	0.563	No	No
19080	79.077	0.436	No	No		145.097	0.485	No	No
19090	47.653	0.314	No	No		138.035	0.515	No	No
19100	88.003	0.425	No	No		152.477	0.541	No	No
19110	110.141	0.336	No	No		141.307	0.569	No	No
19120	80.936	0.385	No	No		144.774	0.474	No	No
19130	89.677	0.371	No	No		163.978	0.533	No	No
19140	69.575	0.38	No	No		155.67	0.446	No	No
19150	37.018	0.338	No	No		146.361	0.491	No	No
19160	75.496	0.42	No	No		150.698	0.516	No	No
19170	44.943	0.352	No	No		150.68	0.555	No	No
19180	54.105	0.319	No	No		151.926	0.423	No	No
19190	68.599	0.338	No	No		136.802	0.523	No	No
19200	53.894	0.38	No	No		148.09	0.501	No	No
19210	79.584	0.363	No	No		145.882	0.499	No	No
19220	62.222	0.349	No	No		147.948	0.447	No	No
19230	87.624	0.397	No	No		139.599	0.498	No	No
19240	67.414	0.33	No	No		151.306	0.465	No	No
19250	82.222	0.368	No	No		139.185	0.534	No	No
19260	94.856	0.355	No	No		156.495	0.505	No	No
19270	65.681	0.392	No	No		154.577	0.451	No	No
19280	52.733	0.344	No	No		149.196	0.437	No	No
19290	41.847	0.345	No	No		150.337	0.512	No	No
19300	81.253	0.393	No	No		151.426	0.518	No	No
19310	85.63	0.367	No	No		140.25	0.499	No	No
19320	67.067	0.462	No	No		151.627	0.447	No	No
19330	49.426	0.421	No	No		152.139	0.477	No	No
19340	68.639	0.397	No	No		143.233	0.562	No	No
19350	65.271	0.44	No	No		149.782	0.476	No	No
19360	39.781	0.376	No	No		138.645	0.556	No	No
19370	75.686	0.418	No	No		150.391	0.515	No	No
19380	54.693	0.363	No	No		152.543	0.481	No	No
19390	72.658	0.395	No	No		155.343	0.451	No	No
19400	50.194	0.376	No	No		148.917	0.496	No	No
19410	50.712	0.357	No	No		142.649	0.551	No	No
19420	81.789	0.352	No	No		151.475	0.493	No	No
19430	80.319	0.435	No	No		141.063	0.484	No	No
19440	31.489	0.336	No	No		151.282	0.525	No	No
19450	59.094	0.392	No	No		154.375	0.493	No	No
19460	63.291	0.379	No	No		140.32	0.507	No	No
19470	41.528	0.304	No	No		144.132	0.495	No	No
19480	70.397	0.368	No	No		150.245	0.459	No	No
19490	93.249	0.359	No	No		152.692	0.452	No	No
19500	73.163	0.373	No	No		149.025	0.49	No	No
19510	66.651	0.405	No	No		152.784	0.517	No	No
19520	80.386	0.377	No	No		149.208	0.468	No	No
19530	99.443	0.355	No	No		155.421	0.449	No	No
19540	56.739	0.366	No	No		157.002	0.477	No	No
19550	77.52	0.364	No	No		154.041	0.484	No	No
19560	39.94	0.308	No	No		142.823	0.466	No	No
19570	83.654	0.433	No	No		158.011	0.463	No	No
19580	61.799	0.376	No	No		147.66	0.475	No	No
19590	32.636	0.318	No	No		153.987	0.497	No	No
19600	50	0.371	No	No		148.674	0.47	No	No
19610	47.658	0.306	No	No		147.023	0.503	No	No
19620	40.187	0.326	No	No		147.61	0.479	No	No
19630	74.914	0.365	No	No		150.721	0.491	No	No
19640	46.804	0.334	No	No		135.089	0.475	No	No
19650	82.483	0.439	No	No		147.924	0.507	No	No
19660	80.322	0.377	No	No		150.197	0.463	No	No
19670	62.626	0.385	No	No		153.25	0.452	No	No
19680	50.444	0.361	No	No		163.132	0.479	No	No
19690	64.944	0.348	No	No		156.611	0.463	No	No
19700	47.855	0.362	No	No		167.076	0.45	No	No
19710	60.369	0.412	No	No		168.573	0.467	No	No
19720	91.887	0.399	No	No		148.165	0.518	No	No
19730	101.968	0.357	No	No		154.228	0.446	No	No
19740	68.796	0.332	No	No		150.193	0.47	No	No
19750	58.002	0.332	No	No		159.178	0.511	No	No
19760	71.786	0.368	No	No		154.731	0.492	No	No
19770	42.323	0.344	No	No		155.544	0.552	No	No
19780	64.693	0.377	No	No		150.928	0.472	No	No
19790	64.304	0.388	No	No		153.507	0.477	No	No
19800	74.737	0.384	No	No		136.996	0.546	No	No
19810	80.723	0.38	No	No		153.839	0.533	No	No
19820	61.068	0.423	No	No		147.322	0.614	No	No
19830	93.416	0.404	No	No		149.604	0.513	No	No
19840	66.955	0.432	No	No		147.701	0.564	No	No
19850	65.732	0.373	No	No		148.574	0.494	No	No
19860	65.984	0.317	No	No		147.523	0.559	No	No
19870	63.979	0.371	No	No		151.132	0.481	No	No
19880	70.714	0.376	No	No		150.416	0.502	No	No
19890	71.985	0.334	No	No		145.898	0.504	No	No
19900	76.465	0.329	No	No		151.061	0.509	No	No
19910	48.566	0.326	No	No		146.787	0.498	No	No
19920	71.738	0.342	No	No		155.523	0.505	No	No
19930	87.932	0.356	No	No		140.583	0.485	No	No
19940	59.779	0.379	No	No		159.101	0.496	No	No
19950	49.783	0.301	No	No		154.556	0.48	No	No
19960	74.043	0.365	No	No		143.048	0.472	No	No
19970	73.22	0.317	No	No		145.253	0.459	No	No
19980	54.531	0.369	No	No		153.662	0.482	No	No
[truncated: 3,010 more rows]

## Sheet: Asn501...Tyr41 | Tyr501...Asp38
Time	Asn501…Tyr41 N501 angle	Asn 501…Tyr41 N501 dist	dist<=0.35 nm	angle<=30 deg.		Tyr501…Asp38 N501Y angle	Tyr501…Asp38 N501Y dist	dist<=0.35 nm	angle<=30 deg.
0	142.194	0.573	No	No		107.905	0.461	No	No
10	137.601	0.558	No	No		83.037	0.466	No	No
20	148.257	0.562	No	No		94.253	0.428	No	No
30	145.345	0.609	No	No		98.829	0.421	No	No
40	149.13	0.587	No	No		68.06	0.441	No	No
50	146.66	0.579	No	No		97.515	0.388	No	No
60	153.57	0.643	No	No		86.996	0.467	No	No
70	140.823	0.707	No	No		84.675	0.467	No	No
80	145.593	0.688	No	No		91.6	0.51	No	No
90	141.151	0.672	No	No		94.285	0.487	No	No
100	139.288	0.678	No	No		81.663	0.418	No	No
110	159.884	0.64	No	No		92.878	0.436	No	No
120	142.105	0.746	No	No		80.356	0.421	No	No
130	158.507	0.6	No	No		92.92	0.384	No	No
140	155.226	0.695	No	No		85.62	0.452	No	No
150	153.03	0.654	No	No		90.905	0.349	No	No
160	147.241	0.601	No	No		57.719	0.371	No	No
170	137.659	0.703	No	No		89.598	0.45	No	No
180	167.597	0.599	No	No		89.415	0.431	No	No
190	148.239	0.669	No	No		89.678	0.49	No	No
200	148.729	0.656	No	No		112.126	0.4	No	No
210	157.59	0.758	No	No		94.745	0.425	No	No
220	155.911	0.749	No	No		126.961	0.47	No	No
230	145.236	0.684	No	No		116.061	0.512	No	No
240	129.078	0.739	No	No		118.653	0.659	No	No
250	153.735	0.749	No	No		116.106	0.52	No	No
260	144.809	0.729	No	No		105.26	0.476	No	No
270	143.458	0.85	No	No		117.887	0.526	No	No
280	155.715	0.684	No	No		113.036	0.544	No	No
290	147.336	0.779	No	No		104.375	0.548	No	No
300	152.307	0.753	No	No		81.239	0.535	No	No
310	150.265	0.732	No	No		86.106	0.538	No	No
320	154.599	0.725	No	No		111.304	0.52	No	No
330	136.606	0.762	No	No		129.828	0.554	No	No
340	141.252	0.806	No	No		110.544	0.529	No	No
350	145.885	0.746	No	No		112.162	0.518	No	No
360	152.45	0.835	No	No		106.091	0.595	No	No
370	149.156	0.796	No	No		102.856	0.523	No	No
380	166.757	0.804	No	No		94.847	0.545	No	No
390	150.208	0.746	No	No		107.669	0.542	No	No
400	147.494	0.754	No	No		110.748	0.544	No	No
410	141.517	0.67	No	No		112.032	0.563	No	No
420	133.653	0.641	No	No		118.085	0.483	No	No
430	130.026	0.747	No	No		103.432	0.554	No	No
440	143.713	0.71	No	No		112.196	0.644	No	No
450	139.248	0.704	No	No		112.546	0.53	No	No
460	147.301	0.586	No	No		85.113	0.538	No	No
470	152.911	0.65	No	No		123.871	0.531	No	No
480	151.736	0.731	No	No		116.82	0.596	No	No
490	143.545	0.634	No	No		111.06	0.523	No	No
500	147.693	0.612	No	No		102.762	0.48	No	No
510	160.497	0.582	No	No		107.573	0.544	No	No
520	150.322	0.74	No	No		126.419	0.545	No	No
530	146.625	0.77	No	No		105.001	0.596	No	No
540	138.371	0.828	No	No		84.899	0.48	No	No
550	140.496	0.758	No	No		90.128	0.518	No	No
560	159.422	0.773	No	No		104.896	0.507	No	No
570	147.367	0.825	No	No		121.398	0.541	No	No
580	148.881	0.77	No	No		111.966	0.528	No	No
590	152.99	0.72	No	No		96.217	0.559	No	No
600	152.451	0.743	No	No		117.98	0.578	No	No
610	146.762	0.758	No	No		124.175	0.497	No	No
620	157.362	0.751	No	No		104.406	0.482	No	No
630	149.782	0.764	No	No		86.909	0.517	No	No
640	135	0.8	No	No		102.329	0.572	No	No
650	143.425	0.664	No	No		109.667	0.457	No	No
660	146.617	0.712	No	No		116.004	0.42	No	No
670	143.423	0.686	No	No		101.18	0.424	No	No
680	145.247	0.698	No	No		109.642	0.438	No	No
690	133.393	0.852	No	No		92.932	0.458	No	No
700	155.874	0.78	No	No		108.183	0.451	No	No
710	144.809	0.709	No	No		99.664	0.414	No	No
720	152.31	0.739	No	No		109.126	0.423	No	No
730	153.32	0.791	No	No		98.612	0.423	No	No
740	150.119	0.748	No	No		100.744	0.391	No	No
750	145.64	0.73	No	No		84.115	0.462	No	No
760	147.006	0.789	No	No		86.943	0.493	No	No
770	156.744	0.716	No	No		97.154	0.493	No	No
780	150.696	0.763	No	No		75.256	0.397	No	No
790	147.361	0.723	No	No		87.256	0.48	No	No
800	139.552	0.823	No	No		102.543	0.577	No	No
810	146.358	0.771	No	No		84.012	0.537	No	No
820	155.204	0.768	No	No		74.348	0.485	No	No
830	151.285	0.752	No	No		102.873	0.432	No	No
840	151.737	0.764	No	No		35.147	0.476	No	No
850	142.858	0.857	No	No		51.754	0.371	No	No
860	136.976	0.752	No	No		39.566	0.467	No	No
870	143.232	0.753	No	No		35.718	0.459	No	No
880	140.359	0.702	No	No		30.311	0.395	No	No
890	148.828	0.701	No	No		49.416	0.441	No	No
900	155.954	0.755	No	No		88.655	0.449	No	No
910	141.4	0.842	No	No		84.114	0.531	No	No
920	141.877	0.811	No	No		66.131	0.48	No	No
930	138.459	0.774	No	No		90.401	0.408	No	No
940	139.749	0.763	No	No		78.999	0.473	No	No
950	150.828	0.761	No	No		53.711	0.457	No	No
960	145.064	0.813	No	No		92.642	0.432	No	No
970	141.975	0.728	No	No		90.816	0.434	No	No
980	155.195	0.659	No	No		95.292	0.433	No	No
990	158.205	0.753	No	No		96.137	0.492	No	No
1000	151.113	0.741	No	No		106.805	0.563	No	No
1010	142.041	0.875	No	No		89.024	0.574	No	No
1020	139.465	0.781	No	No		104.964	0.506	No	No
1030	159.549	0.716	No	No		86.138	0.512	No	No
1040	143.545	0.828	No	No		57.771	0.499	No	No
1050	168.112	0.627	No	No		89.256	0.506	No	No
1060	145.094	0.795	No	No		78.818	0.459	No	No
1070	153.494	0.808	No	No		91.871	0.513	No	No
1080	145.945	0.808	No	No		80.72	0.481	No	No
1090	153.406	0.798	No	No		95.689	0.516	No	No
1100	152.593	0.816	No	No		100.47	0.477	No	No
1110	148.926	0.815	No	No		110.418	0.49	No	No
1120	153.479	0.864	No	No		88.089	0.474	No	No
1130	148.864	0.741	No	No		99.802	0.437	No	No
1140	148.857	0.812	No	No		90.916	0.465	No	No
1150	151.52	0.842	No	No		98.148	0.448	No	No
1160	157.169	0.815	No	No		107.326	0.469	No	No
1170	161.138	0.668	No	No		93.486	0.476	No	No
1180	160.207	0.676	No	No		100.862	0.453	No	No
1190	165.055	0.647	No	No		91.445	0.457	No	No
1200	156.37	0.669	No	No		119.455	0.476	No	No
1210	156.631	0.709	No	No		100.027	0.459	No	No
1220	159.117	0.715	No	No		98.968	0.438	No	No
1230	159.814	0.742	No	No		97.227	0.487	No	No
1240	161.352	0.83	No	No		110.537	0.467	No	No
1250	150.516	0.812	No	No		96.191	0.417	No	No
1260	158.513	0.811	No	No		57.542	0.386	No	No
1270	153.086	0.823	No	No		58.877	0.408	No	No
1280	160.702	0.753	No	No		119.435	0.434	No	No
1290	150.355	0.854	No	No		98.322	0.441	No	No
1300	150.298	0.844	No	No		113.159	0.489	No	No
1310	151.586	0.85	No	No		100.016	0.471	No	No
1320	148.973	0.865	No	No		111.298	0.478	No	No
1330	146.657	0.872	No	No		121.461	0.438	No	No
1340	156.53	0.818	No	No		125.468	0.533	No	No
1350	153.55	0.821	No	No		114.853	0.426	No	No
1360	151.548	0.861	No	No		117.295	0.502	No	No
1370	146.199	0.842	No	No		107.346	0.475	No	No
1380	156.048	0.841	No	No		90.475	0.499	No	No
1390	152.142	0.873	No	No		105.15	0.439	No	No
1400	153.93	0.792	No	No		82.14	0.472	No	No
1410	144.97	0.781	No	No		92.038	0.527	No	No
1420	156.583	0.848	No	No		105.251	0.529	No	No
1430	145.168	0.799	No	No		124.725	0.443	No	No
1440	162.033	0.84	No	No		113.754	0.418	No	No
1450	153.464	0.815	No	No		125.83	0.445	No	No
1460	146.784	0.868	No	No		105.31	0.492	No	No
1470	150.967	0.826	No	No		119.338	0.453	No	No
1480	158.18	0.889	No	No		91.216	0.415	No	No
1490	144.14	0.792	No	No		104.662	0.463	No	No
1500	153.193	0.847	No	No		90.136	0.488	No	No
1510	155.043	0.829	No	No		100.05	0.447	No	No
1520	157.42	0.787	No	No		88.639	0.486	No	No
1530	145.202	0.835	No	No		88.827	0.437	No	No
1540	156.945	0.798	No	No		112.618	0.459	No	No
1550	154.329	0.81	No	No		111.591	0.524	No	No
1560	151.759	0.848	No	No		109.193	0.493	No	No
1570	155.324	0.833	No	No		102.841	0.414	No	No
1580	138.981	0.86	No	No		108.308	0.448	No	No
1590	151.511	0.814	No	No		107.75	0.422	No	No
1600	146.993	0.869	No	No		101.271	0.434	No	No
1610	160.241	0.779	No	No		101.019	0.47	No	No
1620	157.063	0.811	No	No		93.295	0.423	No	No
1630	148.222	0.83	No	No		119.311	0.609	No	No
1640	141.81	0.853	No	No		77.921	0.533	No	No
1650	146.376	0.777	No	No		107.195	0.576	No	No
1660	146.92	0.825	No	No		121.962	0.538	No	No
1670	140.766	0.907	No	No		104.822	0.369	No	No
1680	153.183	0.759	No	No		109.627	0.426	No	No
1690	148.056	0.738	No	No		81.57	0.479	No	No
1700	152.498	0.764	No	No		102.021	0.465	No	No
1710	157.716	0.842	No	No		115.915	0.488	No	No
1720	155.284	0.846	No	No		87.465	0.523	No	No
1730	160.195	0.85	No	No		98.808	0.506	No	No
1740	150.695	0.665	No	No		50.584	0.531	No	No
1750	165.165	0.637	No	No		104.584	0.439	No	No
1760	153.836	0.692	No	No		88.833	0.462	No	No
1770	156.051	0.667	No	No		87.222	0.422	No	No
1780	154.501	0.753	No	No		45.531	0.48	No	No
1790	157.276	0.705	No	No		71.819	0.439	No	No
1800	147.79	0.832	No	No		86.189	0.463	No	No
1810	156.968	0.742	No	No		94.271	0.409	No	No
1820	148.182	0.757	No	No		78.49	0.444	No	No
1830	147.447	0.656	No	No		73.003	0.443	No	No
1840	153.003	0.714	No	No		81.529	0.383	No	No
1850	153.11	0.718	No	No		100.811	0.405	No	No
1860	145.669	0.815	No	No		75.044	0.426	No	No
1870	157.339	0.714	No	No		101.485	0.404	No	No
1880	148.185	0.716	No	No		67.606	0.403	No	No
1890	156.757	0.759	No	No		114.882	0.402	No	No
1900	143.052	0.79	No	No		89.953	0.448	No	No
1910	145.252	0.8	No	No		100.766	0.391	No	No
1920	145.669	0.806	No	No		66.676	0.388	No	No
1930	150.836	0.718	No	No		64.497	0.358	No	No
1940	149.288	0.834	No	No		79.419	0.579	No	No
1950	150.562	0.836	No	No		72.181	0.57	No	No
1960	153.518	0.781	No	No		58.243	0.631	No	No
1970	159.48	0.814	No	No		92.199	0.556	No	No
1980	157.376	0.757	No	No		82.164	0.504	No	No
1990	143.042	0.875	No	No		81.054	0.439	No	No
2000	154.561	0.872	No	No		67.162	0.53	No	No
2010	157.686	0.75	No	No		57.125	0.427	No	No
2020	152.296	0.815	No	No		51.902	0.407	No	No
2030	155.34	0.729	No	No		50.837	0.407	No	No
2040	154.379	0.753	No	No		54.825	0.404	No	No
2050	147.107	0.829	No	No		58.9	0.39	No	No
2060	150.497	0.708	No	No		48.522	0.414	No	No
2070	155.995	0.747	No	No		58.604	0.404	No	No
2080	153.009	0.812	No	No		74.977	0.421	No	No
2090	157.502	0.749	No	No		76.375	0.338	No	No
2100	153.667	0.817	No	No		73.128	0.38	No	No
2110	152.711	0.872	No	No		54.217	0.304	No	No
2120	148.039	0.813	No	No		83.372	0.405	No	No
2130	155.789	0.796	No	No		74.182	0.343	No	No
2140	154.727	0.859	No	No		69.352	0.377	No	No
2150	148.737	0.788	No	No		56.608	0.341	No	No
2160	149.346	0.813	No	No		51.116	0.364	No	No
2170	157.764	0.747	No	No		98.224	0.46	No	No
2180	150.278	0.754	No	No		87.047	0.381	No	No
2190	154.002	0.821	No	No		125.079	0.552	No	No
2200	147.671	0.874	No	No		101.473	0.418	No	No
2210	153.622	0.776	No	No		117.802	0.465	No	No
2220	140.559	0.81	No	No		117.743	0.456	No	No
2230	150.684	0.792	No	No		102.645	0.517	No	No
2240	151.709	0.789	No	No		104.173	0.476	No	No
2250	146.008	0.812	No	No		139.652	0.481	No	No
2260	147.086	0.732	No	No		121.539	0.47	No	No
2270	156.287	0.819	No	No		123.036	0.512	No	No
2280	148.241	0.814	No	No		105.075	0.48	No	No
2290	157.683	0.817	No	No		129	0.468	No	No
2300	156.984	0.876	No	No		109.272	0.455	No	No
2310	150.813	0.799	No	No		118.265	0.519	No	No
2320	167.21	0.732	No	No		109.471	0.458	No	No
2330	164.801	0.627	No	No		93.213	0.397	No	No
2340	168.702	0.589	No	No		128.436	0.459	No	No
2350	170.136	0.683	No	No		93.819	0.464	No	No
2360	167.848	0.655	No	No		112.176	0.423	No	No
2370	160.391	0.662	No	No		119.46	0.454	No	No
2380	166.739	0.607	No	No		134.017	0.444	No	No
2390	172.968	0.6	No	No		96.738	0.415	No	No
2400	159.959	0.679	No	No		127.268	0.495	No	No
2410	172.93	0.643	No	No		99.117	0.405	No	No
2420	161.491	0.739	No	No		115.683	0.455	No	No
2430	147.783	0.743	No	No		87.643	0.452	No	No
2440	168.349	0.64	No	No		115.68	0.442	No	No
2450	164.974	0.747	No	No		107.498	0.475	No	No
2460	153.711	0.775	No	No		108.355	0.378	No	No
2470	160.257	0.742	No	No		124.269	0.448	No	No
2480	157.298	0.835	No	No		108.443	0.438	No	No
2490	165.074	0.763	No	No		134.556	0.468	No	No
2500	161.069	0.781	No	No		124.658	0.529	No	No
2510	152.14	0.833	No	No		95.051	0.408	No	No
2520	160.193	0.814	No	No		100.785	0.453	No	No
2530	163.533	0.757	No	No		56.449	0.41	No	No
2540	150.75	0.803	No	No		110.726	0.421	No	No
2550	164.812	0.746	No	No		98.92	0.465	No	No
2560	157.938	0.817	No	No		91.593	0.504	No	No
2570	162.166	0.683	No	No		95.652	0.467	No	No
2580	169.903	0.785	No	No		85.442	0.502	No	No
2590	166.489	0.771	No	No		77.935	0.567	No	No
2600	154.039	0.771	No	No		84.769	0.565	No	No
2610	169.36	0.671	No	No		67.114	0.528	No	No
2620	169.434	0.757	No	No		78.961	0.589	No	No
2630	157.585	0.716	No	No		76.938	0.529	No	No
2640	163.475	0.752	No	No		64.867	0.556	No	No
2650	168.463	0.743	No	No		109.848	0.518	No	No
2660	151.78	0.636	No	No		108.49	0.491	No	No
2670	159.545	0.74	No	No		66.27	0.567	No	No
2680	166.966	0.71	No	No		102.054	0.453	No	No
2690	161.445	0.693	No	No		89.769	0.538	No	No
2700	135.856	0.692	No	No		104.533	0.443	No	No
2710	155.299	0.767	No	No		89.109	0.468	No	No
2720	169.892	0.618	No	No		53.887	0.396	No	No
2730	166.221	0.657	No	No		84.702	0.42	No	No
2740	152.39	0.729	No	No		51.701	0.399	No	No
2750	171.219	0.709	No	No		65.903	0.374	No	No
2760	156.499	0.689	No	No		72.446	0.355	No	No
2770	161.171	0.705	No	No		53.756	0.359	No	No
2780	162.269	0.681	No	No		50.467	0.402	No	No
2790	160.596	0.744	No	No		71.09	0.35	No	No
2800	168.836	0.714	No	No		65.922	0.571	No	No
2810	154.517	0.766	No	No		84.016	0.479	No	No
2820	158.854	0.806	No	No		90.304	0.431	No	No
2830	160.054	0.769	No	No		95.15	0.519	No	No
2840	151.819	0.674	No	No		52.96	0.51	No	No
2850	165.516	0.634	No	No		72.336	0.505	No	No
2860	149.83	0.715	No	No		72.749	0.646	No	No
2870	157.701	0.699	No	No		77.929	0.508	No	No
2880	164.499	0.66	No	No		90.535	0.387	No	No
2890	160.664	0.676	No	No		81.983	0.444	No	No
2900	155.4	0.675	No	No		57.501	0.468	No	No
2910	165.771	0.702	No	No		74.848	0.339	No	No
2920	163.685	0.749	No	No		81.789	0.404	No	No
2930	169.067	0.678	No	No		113.485	0.351	No	No
2940	162.246	0.69	No	No		5.37	0.259	0.259	5.37
2950	167.735	0.738	No	No		10.543	0.281	0.281	10.543
2960	160.724	0.697	No	No		7.6	0.268	0.268	7.6
2970	170.908	0.719	No	No		11.483	0.271	0.271	11.483
2980	168.037	0.691	No	No		49.067	0.473	No	No
2990	152.633	0.703	No	No		7.299	0.276	0.276	7.299
3000	155.251	0.656	No	No		9.106	0.269	0.269	9.106
3010	159.779	0.696	No	No		6.879	0.255	0.255	6.879
3020	160.164	0.72	No	No		3.674	0.27	0.27	3.674
3030	164.48	0.744	No	No		12.566	0.258	0.258	12.566
3040	160.232	0.676	No	No		20.236	0.258	0.258	20.236
3050	160.594	0.719	No	No		74.298	0.29	No	No
3060	149.756	0.74	No	No		4.874	0.265	0.265	4.874
3070	150.448	0.725	No	No		18.161	0.25	0.25	18.161
3080	144.899	0.761	No	No		11.016	0.263	0.263	11.016
3090	160.353	0.744	No	No		11.103	0.258	0.258	11.103
3100	159.083	0.743	No	No		6.936	0.266	0.266	6.936
3110	166	0.731	No	No		11.437	0.27	0.27	11.437
3120	156.161	0.787	No	No		15.636	0.283	0.283	15.636
3130	161.97	0.648	No	No		11.904	0.254	0.254	11.904
3140	159.235	0.646	No	No		44.524	0.461	No	No
3150	168.574	0.757	No	No		10.877	0.291	0.291	10.877
3160	169.958	0.688	No	No		56.899	0.399	No	No
3170	156.114	0.728	No	No		43.912	0.351	No	No
3180	169.134	0.647	No	No		5.248	0.258	0.258	5.248
3190	167.49	0.735	No	No		11.87	0.263	0.263	11.87
3200	168.604	0.7	No	No		4.62	0.262	0.262	4.62
3210	158.451	0.782	No	No		9.761	0.279	0.279	9.761
3220	159.651	0.718	No	No		9.502	0.279	0.279	9.502
3230	160.532	0.702	No	No		47.255	0.327	No	No
3240	162.536	0.67	No	No		59.619	0.328	No	No
3250	144.503	0.739	No	No		11.924	0.265	0.265	11.924
3260	159.674	0.69	No	No		13.88	0.259	0.259	13.88
3270	165.077	0.689	No	No		16.517	0.263	0.263	16.517
3280	164.938	0.691	No	No		23.673	0.287	0.287	23.673
3290	163.192	0.67	No	No		19.95	0.295	0.295	19.95
3300	159.446	0.672	No	No		56.329	0.468	No	No
3310	159.849	0.742	No	No		7.293	0.264	0.264	7.293
3320	162.339	0.7	No	No		16.622	0.285	0.285	16.622
3330	156.476	0.749	No	No		9.318	0.259	0.259	9.318
3340	153.44	0.691	No	No		29.256	0.289	0.289	29.256
3350	165.602	0.702	No	No		14.487	0.264	0.264	14.487
3360	140.112	0.81	No	No		55.834	0.476	No	No
3370	145.662	0.73	No	No		4.362	0.272	0.272	4.362
3380	145.39	0.693	No	No		17.481	0.276	0.276	17.481
3390	152.757	0.865	No	No		15.399	0.302	0.302	15.399
3400	156.475	0.8	No	No		29.605	0.267	0.267	29.605
3410	147.005	0.731	No	No		20.516	0.282	0.282	20.516
3420	140.868	0.875	No	No		7.199	0.264	0.264	7.199
3430	132.105	0.797	No	No		6.247	0.308	0.308	6.247
3440	151.809	0.852	No	No		47.026	0.295	No	No
3450	137.042	0.816	No	No		60.121	0.476	No	No
3460	143.549	0.788	No	No		5.143	0.258	0.258	5.143
3470	156.748	0.838	No	No		6.937	0.261	0.261	6.937
3480	150.106	0.823	No	No		15.586	0.287	0.287	15.586
3490	159.526	0.735	No	No		32.361	0.286	No	No
3500	151.809	0.784	No	No		9.649	0.267	0.267	9.649
3510	154.071	0.748	No	No		22.696	0.276	0.276	22.696
3520	134.727	0.795	No	No		19.499	0.258	0.258	19.499
3530	140.36	0.848	No	No		22.531	0.254	0.254	22.531
3540	162.447	0.719	No	No		3.868	0.261	0.261	3.868
3550	140.862	0.727	No	No		28.978	0.263	0.263	28.978
3560	158.611	0.613	No	No		15.336	0.261	0.261	15.336
3570	158.207	0.722	No	No		4.211	0.26	0.26	4.211
3580	138.39	0.816	No	No		16.064	0.275	0.275	16.064
3590	141.981	0.835	No	No		37.138	0.368	No	No
3600	131.672	0.823	No	No		46.548	0.487	No	No
3610	133.203	0.818	No	No		43.522	0.527	No	No
3620	146.016	0.818	No	No		28.902	0.437	No	No
3630	152.805	0.823	No	No		48.547	0.339	No	No
3640	150.169	0.787	No	No		6.965	0.276	0.276	6.965
3650	133.648	0.601	No	No		41.463	0.428	No	No
3660	144.722	0.893	No	No		54.532	0.362	No	No
3670	148.367	0.877	No	No		15.684	0.267	0.267	15.684
3680	140.684	0.855	No	No		96.496	0.351	No	No
3690	130.905	0.868	No	No		17.855	0.277	0.277	17.855
3700	144.902	0.84	No	No		11.496	0.289	0.289	11.496
3710	151.486	0.847	No	No		2.048	0.259	0.259	2.048
3720	125.033	0.858	No	No		13.912	0.255	0.255	13.912
3730	145.811	0.914	No	No		16	0.267	0.267	16
3740	131.884	0.824	No	No		21.359	0.279	0.279	21.359
3750	147.855	0.876	No	No		19.119	0.275	0.275	19.119
3760	141.848	0.847	No	No		14.083	0.279	0.279	14.083
3770	134.392	0.81	No	No		28.047	0.31	0.31	28.047
3780	143.288	0.887	No	No		9.805	0.248	0.248	9.805
3790	128.175	0.764	No	No		22.42	0.251	0.251	22.42
3800	153.981	0.874	No	No		8.901	0.256	0.256	8.901
3810	141.342	0.91	No	No		6.41	0.285	0.285	6.41
3820	140.505	0.855	No	No		13.402	0.277	0.277	13.402
3830	141.654	0.915	No	No		23.767	0.281	0.281	23.767
3840	153.677	0.81	No	No		20.683	0.263	0.263	20.683
3850	145.716	0.863	No	No		13.478	0.292	0.292	13.478
3860	159.478	0.798	No	No		12.185	0.284	0.284	12.185
3870	133.474	0.851	No	No		10.548	0.27	0.27	10.548
3880	144.788	0.884	No	No		4.047	0.286	0.286	4.047
3890	148.149	0.863	No	No		7.968	0.265	0.265	7.968
3900	142.569	0.862	No	No		2.53	0.262	0.262	2.53
3910	139.719	0.865	No	No		21.674	0.285	0.285	21.674
3920	152.357	0.93	No	No		8.329	0.249	0.249	8.329
3930	148.092	0.792	No	No		8.619	0.256	0.256	8.619
3940	164.053	0.768	No	No		17.647	0.26	0.26	17.647
3950	147.828	0.79	No	No		4.112	0.267	0.267	4.112
3960	153.736	0.743	No	No		22.474	0.263	0.263	22.474
3970	166.877	0.668	No	No		18.238	0.269	0.269	18.238
3980	176.626	0.62	No	No		15.162	0.271	0.271	15.162
3990	153.021	0.726	No	No		23.684	0.491	No	No
4000	164.017	0.719	No	No		6.605	0.261	0.261	6.605
4010	157.786	0.738	No	No		29.654	0.309	0.309	29.654
4020	156.935	0.758	No	No		5.918	0.28	0.28	5.918
4030	170.879	0.741	No	No		29.411	0.343	0.343	29.411
4040	138.099	0.73	No	No		19.846	0.272	0.272	19.846
4050	169.564	0.728	No	No		9.333	0.265	0.265	9.333
4060	166.619	0.703	No	No		9.662	0.272	0.272	9.662
4070	151.979	0.719	No	No		41.305	0.389	No	No
4080	147.575	0.699	No	No		11.656	0.263	0.263	11.656
4090	163.818	0.713	No	No		13.912	0.268	0.268	13.912
4100	162.621	0.764	No	No		6.162	0.26	0.26	6.162
4110	155.256	0.763	No	No		3.27	0.254	0.254	3.27
4120	144.439	0.711	No	No		45.058	0.373	No	No
4130	158.727	0.756	No	No		58.311	0.615	No	No
4140	152.757	0.733	No	No		32.715	0.544	No	No
4150	145.764	0.625	No	No		43.565	0.544	No	No
4160	144.494	0.673	No	No		48.993	0.413	No	No
4170	153.606	0.719	No	No		40.729	0.492	No	No
4180	152.939	0.635	No	No		42.405	0.439	No	No
4190	139.786	0.551	No	No		61.778	0.507	No	No
4200	133.796	0.634	No	No		42.303	0.481	No	No
4210	155.191	0.71	No	No		49.93	0.522	No	No
4220	162.479	0.68	No	No		50.676	0.478	No	No
4230	149.04	0.692	No	No		53.247	0.543	No	No
4240	130.683	0.7	No	No		61.182	0.56	No	No
4250	145.455	0.632	No	No		53.091	0.464	No	No
4260	138.947	0.657	No	No		68.157	0.592	No	No
4270	138.262	0.634	No	No		64.551	0.524	No	No
4280	147.026	0.704	No	No		56.928	0.59	No	No
4290	166.841	0.716	No	No		54.318	0.491	No	No
4300	129.258	0.669	No	No		39.297	0.516	No	No
4310	155.078	0.738	No	No		61.225	0.483	No	No
4320	143.428	0.735	No	No		74.606	0.475	No	No
4330	153.511	0.736	No	No		13.133	0.47	No	No
4340	138.557	0.76	No	No		20.42	0.454	No	No
4350	149.82	0.736	No	No		32.779	0.464	No	No
4360	155.561	0.757	No	No		25.905	0.497	No	No
4370	147.808	0.786	No	No		14.722	0.483	No	No
4380	145.308	0.879	No	No		32.08	0.435	No	No
4390	156.605	0.74	No	No		19.113	0.48	No	No
4400	166.907	0.775	No	No		9.063	0.476	No	No
4410	145.054	0.752	No	No		37.722	0.451	No	No
4420	127.521	0.728	No	No		34.004	0.448	No	No
4430	151.86	0.714	No	No		30.527	0.442	No	No
4440	135.801	0.748	No	No		67.713	0.482	No	No
4450	148.785	0.756	No	No		22.041	0.452	No	No
4460	141.225	0.739	No	No		55.197	0.564	No	No
4470	133.822	0.777	No	No		25.349	0.469	No	No
4480	137.267	0.741	No	No		13.177	0.472	No	No
4490	143.589	0.716	No	No		16.967	0.471	No	No
4500	169.043	0.679	No	No		67.061	0.497	No	No
4510	160.982	0.67	No	No		61.893	0.494	No	No
4520	150.794	0.726	No	No		26.413	0.456	No	No
4530	149.421	0.69	No	No		66.561	0.495	No	No
4540	149.656	0.781	No	No		18.987	0.449	No	No
4550	139.616	0.737	No	No		54.405	0.438	No	No
4560	166.323	0.659	No	No		56.447	0.495	No	No
4570	164.609	0.611	No	No		40.096	0.54	No	No
4580	168.256	0.617	No	No		65.576	0.432	No	No
4590	139.545	0.777	No	No		12.895	0.48	No	No
4600	165.386	0.663	No	No		16.178	0.501	No	No
4610	154.746	0.626	No	No		10.938	0.494	No	No
4620	171.749	0.643	No	No		21.324	0.478	No	No
4630	145.172	0.749	No	No		16.978	0.472	No	No
4640	160.361	0.777	No	No		10.307	0.454	No	No
4650	145.423	0.7	No	No		26.605	0.479	No	No
4660	155.545	0.741	No	No		29.25	0.463	No	No
4670	159.005	0.705	No	No		6.052	0.464	No	No
4680	157.317	0.705	No	No		27.652	0.51	No	No
4690	162.102	0.704	No	No		27.473	0.474	No	No
4700	164.388	0.596	No	No		21.857	0.466	No	No
4710	159.003	0.652	No	No		19.375	0.464	No	No
4720	161.975	0.683	No	No		31.496	0.446	No	No
4730	164.33	0.691	No	No		26.854	0.454	No	No
4740	147.633	0.609	No	No		9.748	0.494	No	No
4750	164.168	0.668	No	No		16.745	0.461	No	No
4760	164.782	0.692	No	No		8.287	0.459	No	No
4770	152.426	0.75	No	No		30.649	0.471	No	No
4780	157.699	0.666	No	No		25.78	0.435	No	No
4790	151.676	0.676	No	No		5.994	0.466	No	No
4800	159.44	0.707	No	No		11.986	0.484	No	No
4810	158.747	0.699	No	No		33.001	0.468	No	No
4820	157.397	0.693	No	No		72.828	0.542	No	No
4830	160.795	0.745	No	No		33.666	0.348	No	No
4840	171.095	0.698	No	No		36.631	0.392	No	No
4850	148.17	0.677	No	No		26.667	0.428	No	No
4860	146.13	0.619	No	No		52.143	0.422	No	No
4870	166.491	0.637	No	No		27.961	0.36	No	No
4880	160.423	0.624	No	No		43.717	0.376	No	No
4890	148.912	0.634	No	No		29.294	0.358	No	No
4900	164.295	0.683	No	No		46.52	0.318	No	No
4910	143.058	0.696	No	No		46.255	0.345	No	No
4920	154.276	0.696	No	No		62.789	0.499	No	No
4930	167.905	0.718	No	No		43.453	0.293	No	No
4940	162.278	0.697	No	No		37.358	0.353	No	No
4950	155.278	0.608	No	No		29.941	0.4	No	No
4960	166.578	0.691	No	No		28.345	0.353	No	No
4970	167.262	0.679	No	No		88.385	0.44	No	No
4980	149.013	0.68	No	No		43.717	0.362	No	No
4990	153.719	0.709	No	No		37.524	0.431	No	No
5000	166.863	0.624	No	No		31.162	0.413	No	No
5010	148.596	0.774	No	No		87.249	0.542	No	No
5020	158.94	0.743	No	No		60.531	0.484	No	No
5030	167.511	0.78	No	No		40.758	0.554	No	No
5040	140.047	0.759	No	No		66.744	0.622	No	No
5050	136.317	0.734	No	No		125.026	0.672	No	No
5060	162.566	0.711	No	No		42.442	0.593	No	No
5070	151.321	0.741	No	No		63.525	0.564	No	No
5080	145.925	0.715	No	No		79.062	0.547	No	No
5090	156.234	0.725	No	No		82.021	0.508	No	No
5100	166.308	0.663	No	No		55.234	0.629	No	No
5110	155.605	0.721	No	No		65.66	0.631	No	No
5120	172.475	0.716	No	No		90.823	0.624	No	No
5130	167.819	0.688	No	No		80.114	0.575	No	No
5140	144.074	0.778	No	No		96.631	0.665	No	No
5150	135.999	0.78	No	No		55.552	0.587	No	No
5160	143.297	0.627	No	No		83.68	0.503	No	No
5170	156.852	0.759	No	No		105.217	0.564	No	No
5180	149.088	0.778	No	No		84.414	0.491	No	No
5190	165.879	0.679	No	No		94.098	0.339	No	No
5200	153.948	0.716	No	No		85.401	0.365	No	No
5210	149.231	0.755	No	No		84.338	0.371	No	No
5220	144.612	0.756	No	No		95.266	0.402	No	No
5230	155.272	0.76	No	No		62.878	0.343	No	No
5240	153.45	0.689	No	No		75.552	0.401	No	No
5250	141.515	0.745	No	No		47.786	0.401	No	No
5260	166.644	0.726	No	No		76.036	0.419	No	No
5270	154.344	0.711	No	No		27.518	0.463	No	No
5280	149.641	0.624	No	No		37.7	0.433	No	No
5290	154.734	0.69	No	No		103.303	0.374	No	No
5300	167.194	0.69	No	No		47.876	0.399	No	No
5310	160.167	0.764	No	No		99.565	0.347	No	No
5320	158.587	0.734	No	No		83.415	0.402	No	No
5330	158.853	0.679	No	No		90.163	0.393	No	No
5340	159.658	0.756	No	No		89.251	0.377	No	No
5350	162.349	0.742	No	No		33.535	0.462	No	No
5360	158.505	0.713	No	No		61.132	0.371	No	No
5370	154.201	0.724	No	No		66.213	0.521	No	No
5380	156.795	0.773	No	No		51.929	0.466	No	No
5390	129.634	0.825	No	No		53.743	0.385	No	No
5400	131.702	0.778	No	No		80.924	0.461	No	No
5410	154.226	0.766	No	No		79.464	0.407	No	No
5420	156.029	0.752	No	No		81.431	0.459	No	No
5430	157	0.742	No	No		101.731	0.441	No	No
5440	154.258	0.745	No	No		86.317	0.495	No	No
5450	143.556	0.739	No	No		93.909	0.484	No	No
5460	147.099	0.744	No	No		113.541	0.433	No	No
5470	149.5	0.797	No	No		69.439	0.41	No	No
5480	160.059	0.759	No	No		84.391	0.414	No	No
5490	134.572	0.682	No	No		119.551	0.418	No	No
5500	143.732	0.781	No	No		71.331	0.329	No	No
5510	145.831	0.666	No	No		51.322	0.369	No	No
5520	147.21	0.683	No	No		37.043	0.539	No	No
5530	150.043	0.686	No	No		51.393	0.607	No	No
5540	148.252	0.741	No	No		33.156	0.466	No	No
5550	149.17	0.516	No	No		38.475	0.467	No	No
5560	145.026	0.66	No	No		41.512	0.553	No	No
5570	150.112	0.691	No	No		45.138	0.548	No	No
5580	142.175	0.731	No	No		39.932	0.486	No	No
5590	152.883	0.663	No	No		21.082	0.72	No	No
5600	146.538	0.775	No	No		40.818	0.521	No	No
5610	148.696	0.742	No	No		57.522	0.466	No	No
5620	152.448	0.675	No	No		46.939	0.585	No	No
5630	143.008	0.674	No	No		61.131	0.571	No	No
5640	147.693	0.666	No	No		7.168	0.265	0.265	7.168
5650	143.475	0.701	No	No		67	0.382	No	No
5660	156.27	0.6	No	No		53.527	0.462	No	No
5670	148.711	0.711	No	No		71.936	0.344	No	No
5680	149.163	0.714	No	No		57.855	0.389	No	No
5690	150.485	0.745	No	No		66.193	0.388	No	No
5700	144.372	0.667	No	No		81.763	0.352	No	No
5710	145.603	0.67	No	No		28.838	0.344	0.344	28.838
5720	149	0.661	No	No		53.83	0.576	No	No
5730	140.233	0.668	No	No		50.954	0.543	No	No
5740	145.05	0.704	No	No		47.925	0.458	No	No
5750	134.842	0.743	No	No		65.345	0.572	No	No
5760	137.104	0.673	No	No		56.167	0.418	No	No
5770	146.977	0.64	No	No		45.417	0.439	No	No
5780	137.711	0.756	No	No		57.358	0.523	No	No
5790	146.205	0.633	No	No		7.511	0.253	0.253	7.511
5800	138.384	0.669	No	No		11.807	0.263	0.263	11.807
5810	161.31	0.716	No	No		7.97	0.256	0.256	7.97
5820	153.708	0.651	No	No		10.598	0.264	0.264	10.598
5830	58.249	0.409	No	No		33.26	0.322	No	No
5840	106.385	0.403	No	No		61.052	0.448	No	No
5850	67.055	0.383	No	No		30.12	0.329	No	No
5860	113.96	0.437	No	No		30.235	0.286	No	No
5870	139.501	0.431	No	No		28.091	0.339	0.339	28.091
5880	109.093	0.4	No	No		50.035	0.597	No	No
5890	117.021	0.47	No	No		61.802	0.54	No	No
5900	127.231	0.469	No	No		75.829	0.582	No	No
5910	63.732	0.339	No	No		62.062	0.441	No	No
5920	95.3	0.412	No	No		44.167	0.636	No	No
5930	65.158	0.382	No	No		69.937	0.503	No	No
5940	104.447	0.309	No	No		54.743	0.594	No	No
5950	119.196	0.357	No	No		56.94	0.595	No	No
5960	106.735	0.306	No	No		50.735	0.467	No	No
5970	86.208	0.39	No	No		54.552	0.581	No	No
5980	52.894	0.381	No	No		6.461	0.309	0.309	6.461
5990	61.945	0.596	No	No		25.19	0.268	0.268	25.19
6000	75.061	0.553	No	No		2.263	0.275	0.275	2.263
6010	54.561	0.388	No	No		8.069	0.273	0.273	8.069
6020	61.778	0.415	No	No		20.08	0.268	0.268	20.08
6030	72.036	0.442	No	No		9.766	0.255	0.255	9.766
6040	64.415	0.326	No	No		9.202	0.277	0.277	9.202
6050	73.163	0.382	No	No		16.617	0.296	0.296	16.617
6060	71.703	0.349	No	No		12.078	0.252	0.252	12.078
6070	100.362	0.401	No	No		23.445	0.271	0.271	23.445
6080	101.41	0.354	No	No		16.068	0.256	0.256	16.068
6090	75.748	0.34	No	No		10.955	0.275	0.275	10.955
6100	56.215	0.49	No	No		23.093	0.279	0.279	23.093
6110	60.628	0.353	No	No		16.757	0.293	0.293	16.757
6120	75.563	0.333	No	No		18.614	0.287	0.287	18.614
6130	67.85	0.349	No	No		49.081	0.372	No	No
6140	96.134	0.338	No	No		27.788	0.607	No	No
6150	80.682	0.368	No	No		56.801	0.525	No	No
6160	73.569	0.368	No	No		62.529	0.551	No	No
6170	59.989	0.388	No	No		51.671	0.479	No	No
6180	60.855	0.407	No	No		40.328	0.582	No	No
6190	78.328	0.311	No	No		49.019	0.533	No	No
6200	57.309	0.336	No	No		77.757	0.521	No	No
6210	67.786	0.344	No	No		56.095	0.525	No	No
6220	88.031	0.398	No	No		45.173	0.398	No	No
6230	70.128	0.382	No	No		43.544	0.545	No	No
6240	96.445	0.413	No	No		52.551	0.6	No	No
6250	76.657	0.39	No	No		45.548	0.564	No	No
6260	84.565	0.385	No	No		31.535	0.622	No	No
6270	83.499	0.365	No	No		44.116	0.506	No	No
6280	103.595	0.378	No	No		57.591	0.775	No	No
6290	61.751	0.396	No	No		28.908	0.613	No	No
6300	76.211	0.354	No	No		19.666	0.666	No	No
6310	63.583	0.342	No	No		18.497	0.693	No	No
6320	68.122	0.376	No	No		26.957	0.627	No	No
6330	66.484	0.365	No	No		58.818	0.679	No	No
6340	72.447	0.366	No	No		30.253	0.596	No	No
6350	75.25	0.399	No	No		46.965	0.729	No	No
6360	53.542	0.357	No	No		59.69	0.719	No	No
6370	49.924	0.418	No	No		54.883	0.734	No	No
6380	58.935	0.406	No	No		67.07	0.749	No	No
6390	65.373	0.373	No	No		113.653	0.652	No	No
6400	67.736	0.385	No	No		52.816	0.617	No	No
6410	73.87	0.365	No	No		16.517	0.479	No	No
6420	89.829	0.343	No	No		87.591	0.525	No	No
6430	67.681	0.368	No	No		43.439	0.42	No	No
6440	56.277	0.392	No	No		24.874	0.474	No	No
6450	59.116	0.411	No	No		8.14	0.452	No	No
6460	47.162	0.4	No	No		26.695	0.436	No	No
6470	69.052	0.433	No	No		37.829	0.414	No	No
6480	68.177	0.335	No	No		36.246	0.596	No	No
6490	53.566	0.383	No	No		65.9	0.46	No	No
6500	70.55	0.388	No	No		30.238	0.414	No	No
6510	65.545	0.421	No	No		46.263	0.42	No	No
6520	81.013	0.374	No	No		42.052	0.448	No	No
6530	60.337	0.37	No	No		22.931	0.439	No	No
6540	106.769	0.355	No	No		70.615	0.408	No	No
6550	81.974	0.36	No	No		81.13	0.371	No	No
6560	56.707	0.414	No	No		70.588	0.46	No	No
6570	75.528	0.444	No	No		87.432	0.374	No	No
6580	57.539	0.382	No	No		102.633	0.426	No	No
6590	78.904	0.337	No	No		70.566	0.474	No	No
6600	66.332	0.43	No	No		37.61	0.465	No	No
6610	59.816	0.37	No	No		38.81	0.443	No	No
6620	70.013	0.351	No	No		49.058	0.459	No	No
6630	74.082	0.388	No	No		46.34	0.445	No	No
6640	40.886	0.346	No	No		41.582	0.42	No	No
6650	70.822	0.384	No	No		116.71	0.502	No	No
6660	84.392	0.383	No	No		101.974	0.43	No	No
6670	99.564	0.431	No	No		97.539	0.469	No	No
6680	43.614	0.427	No	No		74.935	0.415	No	No
6690	75.781	0.296	No	No		73.851	0.43	No	No
6700	58.714	0.458	No	No		55.257	0.452	No	No
6710	60.119	0.407	No	No		56.902	0.507	No	No
6720	63.409	0.362	No	No		49.125	0.569	No	No
6730	27.815	0.345	0.345	27.815		35.984	0.484	No	No
6740	59.954	0.401	No	No		56.408	0.528	No	No
6750	60.898	0.386	No	No		72.996	0.594	No	No
6760	41.579	0.377	No	No		35.133	0.506	No	No
6770	32.256	0.394	No	No		76.681	0.539	No	No
6780	58.136	0.382	No	No		63.398	0.403	No	No
6790	35.254	0.343	No	No		46.164	0.535	No	No
6800	50.276	0.44	No	No		44.288	0.506	No	No
6810	57.565	0.401	No	No		83.008	0.49	No	No
6820	70.762	0.463	No	No		91.606	0.523	No	No
6830	54.897	0.38	No	No		86.116	0.618	No	No
6840	67.451	0.446	No	No		51.236	0.609	No	No
6850	57.609	0.346	No	No		39.919	0.367	No	No
6860	71.536	0.478	No	No		54.002	0.434	No	No
6870	71.33	0.375	No	No		16.32	0.467	No	No
6880	72.392	0.33	No	No		23.078	0.483	No	No
6890	73.717	0.345	No	No		78.399	0.445	No	No
6900	67.944	0.412	No	No		82.839	0.406	No	No
6910	83.47	0.413	No	No		25.271	0.478	No	No
6920	76.655	0.387	No	No		13.905	0.515	No	No
6930	57.214	0.359	No	No		44.161	0.418	No	No
6940	58.056	0.313	No	No		84.513	0.354	No	No
6950	79.447	0.386	No	No		63.636	0.394	No	No
6960	61.849	0.358	No	No		77.669	0.333	No	No
6970	63.463	0.299	No	No		68.207	0.396	No	No
6980	61.31	0.394	No	No		31.981	0.476	No	No
6990	61.275	0.352	No	No		69.407	0.343	No	No
7000	45.952	0.376	No	No		53.175	0.367	No	No
7010	77.242	0.383	No	No		60.747	0.463	No	No
7020	64.276	0.363	No	No		50.571	0.439	No	No
7030	55.127	0.436	No	No		58.383	0.476	No	No
7040	68.853	0.384	No	No		37.567	0.312	No	No
7050	80.004	0.418	No	No		4.402	0.27	0.27	4.402
7060	76.803	0.345	No	No		12.947	0.272	0.272	12.947
7070	72.036	0.327	No	No		82.132	0.421	No	No
7080	57.637	0.389	No	No		82.2	0.364	No	No
7090	51.499	0.357	No	No		82.29	0.391	No	No
7100	56.35	0.386	No	No		57.184	0.348	No	No
7110	78.049	0.37	No	No		76.405	0.413	No	No
7120	56.854	0.319	No	No		86.809	0.389	No	No
7130	61.061	0.32	No	No		9.618	0.265	0.265	9.618
7140	49.863	0.389	No	No		19.078	0.27	0.27	19.078
7150	48.368	0.349	No	No		24.335	0.258	0.258	24.335
7160	57.103	0.482	No	No		93.94	0.384	No	No
7170	68.472	0.329	No	No		21.282	0.34	0.34	21.282
7180	93.048	0.431	No	No		75.643	0.472	No	No
7190	69.515	0.32	No	No		1.48	0.273	0.273	1.48
7200	59.162	0.392	No	No		43.045	0.477	No	No
7210	65.889	0.383	No	No		11.597	0.266	0.266	11.597
7220	46.846	0.358	No	No		4.591	0.266	0.266	4.591
7230	80.989	0.414	No	No		15.486	0.278	0.278	15.486
7240	66.662	0.471	No	No		18.784	0.269	0.269	18.784
7250	71.66	0.512	No	No		4.729	0.25	0.25	4.729
7260	68.504	0.43	No	No		42.675	0.298	No	No
7270	72.669	0.373	No	No		8.357	0.257	0.257	8.357
7280	60.938	0.44	No	No		12.042	0.276	0.276	12.042
7290	70.764	0.344	No	No		6.364	0.253	0.253	6.364
7300	64.891	0.289	No	No		13.814	0.277	0.277	13.814
7310	58.13	0.37	No	No		9.447	0.247	0.247	9.447
7320	48.577	0.411	No	No		19.064	0.286	0.286	19.064
7330	80.4	0.342	No	No		21.991	0.294	0.294	21.991
7340	78.399	0.345	No	No		28.159	0.281	0.281	28.159
7350	71.697	0.471	No	No		9.329	0.284	0.284	9.329
7360	68.914	0.452	No	No		12.177	0.295	0.295	12.177
7370	70.022	0.373	No	No		5.965	0.245	0.245	5.965
7380	78.702	0.438	No	No		12.727	0.282	0.282	12.727
7390	63.466	0.436	No	No		11.86	0.268	0.268	11.86
7400	74.878	0.332	No	No		27.96	0.301	0.301	27.96
7410	45.196	0.32	No	No		27.214	0.298	0.298	27.214
7420	72.102	0.386	No	No		17.781	0.273	0.273	17.781
7430	53.974	0.349	No	No		10.227	0.261	0.261	10.227
7440	63.965	0.374	No	No		15.286	0.265	0.265	15.286
7450	61.201	0.383	No	No		30.067	0.313	No	No
7460	51.066	0.424	No	No		20.55	0.259	0.259	20.55
7470	80.912	0.388	No	No		11.204	0.26	0.26	11.204
7480	44.453	0.38	No	No		5.225	0.261	0.261	5.225
7490	86.105	0.403	No	No		6.61	0.265	0.265	6.61
7500	54	0.317	No	No		10.511	0.272	0.272	10.511
7510	63.145	0.323	No	No		4.059	0.268	0.268	4.059
7520	34	0.338	No	No		17.044	0.265	0.265	17.044
7530	92.229	0.31	No	No		5.711	0.278	0.278	5.711
7540	62.714	0.513	No	No		16.883	0.294	0.294	16.883
7550	75.907	0.359	No	No		6.34	0.256	0.256	6.34
7560	68.91	0.409	No	No		10.701	0.269	0.269	10.701
7570	71.489	0.374	No	No		12.125	0.262	0.262	12.125
7580	60.791	0.376	No	No		15.056	0.256	0.256	15.056
7590	81.004	0.416	No	No		12.371	0.253	0.253	12.371
7600	71.904	0.328	No	No		12.039	0.266	0.266	12.039
7610	86.237	0.375	No	No		16.709	0.256	0.256	16.709
7620	75.782	0.33	No	No		23.872	0.279	0.279	23.872
7630	69.126	0.363	No	No		15.545	0.279	0.279	15.545
7640	81.257	0.358	No	No		33.138	0.409	No	No
7650	60.468	0.346	No	No		13.479	0.281	0.281	13.479
7660	71.477	0.355	No	No		11.08	0.276	0.276	11.08
7670	80.532	0.436	No	No		15.646	0.254	0.254	15.646
7680	53.888	0.388	No	No		9.919	0.269	0.269	9.919
7690	70.131	0.392	No	No		15.103	0.266	0.266	15.103
7700	68.127	0.405	No	No		14.33	0.246	0.246	14.33
7710	85.175	0.339	No	No		93.886	0.436	No	No
7720	92.082	0.348	No	No		98.771	0.531	No	No
7730	63.222	0.366	No	No		80.088	0.564	No	No
7740	85.713	0.372	No	No		97.706	0.518	No	No
7750	70.056	0.338	No	No		95.783	0.61	No	No
7760	79.313	0.384	No	No		104.654	0.615	No	No
7770	80.66	0.377	No	No		57.332	0.586	No	No
7780	54.562	0.384	No	No		61.212	0.577	No	No
7790	76.833	0.414	No	No		94.403	0.655	No	No
7800	85.492	0.396	No	No		75.856	0.65	No	No
7810	70.835	0.37	No	No		80.759	0.622	No	No
7820	78.481	0.421	No	No		96.652	0.582	No	No
7830	65.714	0.316	No	No		60.711	0.543	No	No
7840	69.288	0.41	No	No		86.024	0.52	No	No
7850	71.243	0.412	No	No		82.047	0.485	No	No
7860	96.21	0.383	No	No		69.298	0.581	No	No
7870	76.622	0.386	No	No		77.823	0.577	No	No
7880	56.939	0.378	No	No		77.621	0.602	No	No
7890	77.518	0.456	No	No		78.386	0.593	No	No
7900	77.972	0.315	No	No		89.106	0.588	No	No
7910	74.862	0.343	No	No		77.829	0.635	No	No
7920	82.85	0.389	No	No		74.785	0.644	No	No
7930	60.633	0.363	No	No		39.419	0.47	No	No
7940	77.92	0.386	No	No		89.244	0.586	No	No
7950	54.457	0.411	No	No		95.557	0.64	No	No
7960	59.06	0.364	No	No		80.884	0.632	No	No
7970	73.565	0.364	No	No		81.816	0.602	No	No
7980	47.292	0.352	No	No		99.385	0.646	No	No
7990	78.551	0.388	No	No		65.834	0.642	No	No
8000	51.807	0.437	No	No		76.492	0.654	No	No
8010	60.758	0.385	No	No		56.754	0.656	No	No
8020	73.212	0.423	No	No		58.923	0.47	No	No
8030	65.326	0.425	No	No		84.988	0.385	No	No
8040	65.723	0.325	No	No		65.321	0.332	No	No
8050	79.884	0.425	No	No		66.568	0.496	No	No
8060	79.359	0.359	No	No		52.164	0.425	No	No
8070	84.437	0.354	No	No		63.648	0.404	No	No
8080	91.763	0.336	No	No		52.757	0.468	No	No
8090	84.167	0.326	No	No		35.66	0.446	No	No
8100	57.163	0.333	No	No		31.451	0.434	No	No
8110	46.951	0.449	No	No		52.741	0.381	No	No
8120	71.448	0.371	No	No		67.276	0.415	No	No
8130	76.263	0.421	No	No		59.832	0.404	No	No
8140	77.878	0.39	No	No		37.754	0.431	No	No
8150	66.134	0.409	No	No		56.558	0.339	No	No
8160	88.54	0.387	No	No		85.828	0.385	No	No
8170	62.221	0.41	No	No		49.564	0.394	No	No
8180	45.092	0.364	No	No		46.714	0.386	No	No
8190	62.704	0.435	No	No		87.957	0.352	No	No
8200	65.079	0.32	No	No		128.218	0.434	No	No
8210	76.118	0.44	No	No		78.177	0.389	No	No
8220	82.582	0.386	No	No		78.945	0.402	No	No
8230	72.76	0.474	No	No		106.278	0.414	No	No
8240	57.147	0.355	No	No		47.572	0.532	No	No
8250	70.291	0.349	No	No		38.399	0.501	No	No
8260	67.708	0.396	No	No		44.313	0.569	No	No
8270	78.669	0.432	No	No		48.566	0.564	No	No
8280	87.735	0.415	No	No		56.98	0.558	No	No
8290	58.863	0.356	No	No		77.333	0.609	No	No
8300	59.505	0.373	No	No		84.622	0.554	No	No
8310	67.716	0.333	No	No		75.219	0.529	No	No
8320	75.336	0.359	No	No		63.661	0.562	No	No
8330	73.869	0.427	No	No		59.321	0.531	No	No
8340	69.927	0.419	No	No		50.13	0.547	No	No
8350	71.464	0.345	No	No		68.008	0.523	No	No
8360	61.355	0.382	No	No		102.326	0.597	No	No
8370	75.776	0.402	No	No		54.74	0.57	No	No
8380	68.099	0.369	No	No		51.817	0.613	No	No
8390	76.388	0.419	No	No		53.785	0.586	No	No
8400	57.589	0.34	No	No		28.327	0.562	No	No
8410	73.944	0.389	No	No		51.063	0.656	No	No
8420	58.534	0.351	No	No		45.375	0.532	No	No
8430	69.662	0.34	No	No		77.198	0.527	No	No
8440	57.285	0.374	No	No		96.775	0.617	No	No
8450	68.781	0.327	No	No		61.38	0.498	No	No
8460	67.169	0.311	No	No		104.757	0.587	No	No
8470	57.195	0.406	No	No		69.718	0.497	No	No
8480	74.223	0.348	No	No		57.071	0.482	No	No
8490	61.858	0.404	No	No		80.4	0.574	No	No
8500	59.441	0.375	No	No		44.055	0.594	No	No
8510	43.711	0.405	No	No		55.587	0.507	No	No
8520	61.153	0.438	No	No		53.198	0.532	No	No
8530	66.624	0.336	No	No		30.905	0.418	No	No
8540	59.31	0.436	No	No		52.373	0.39	No	No
8550	51.758	0.401	No	No		43.542	0.531	No	No
8560	81.427	0.479	No	No		53.366	0.529	No	No
8570	74.913	0.402	No	No		49.468	0.507	No	No
8580	80.983	0.39	No	No		35.783	0.611	No	No
8590	74.46	0.36	No	No		55.567	0.501	No	No
8600	94.895	0.364	No	No		52.303	0.492	No	No
8610	77.15	0.333	No	No		62.703	0.526	No	No
8620	80.359	0.46	No	No		66.973	0.586	No	No
8630	59.146	0.37	No	No		45.451	0.512	No	No
8640	96.84	0.386	No	No		36.209	0.627	No	No
8650	93.357	0.411	No	No		60.12	0.541	No	No
8660	63.853	0.365	No	No		29.286	0.653	No	No
8670	83.402	0.363	No	No		64.132	0.581	No	No
8680	69.793	0.33	No	No		91.324	0.583	No	No
8690	62.686	0.336	No	No		72.937	0.55	No	No
8700	74.21	0.364	No	No		56.306	0.608	No	No
8710	67.896	0.373	No	No		51.631	0.632	No	No
8720	139.905	0.414	No	No		54.382	0.601	No	No
8730	135.356	0.418	No	No		74.579	0.544	No	No
8740	140.287	0.423	No	No		72.795	0.559	No	No
8750	135.344	0.374	No	No		67.342	0.544	No	No
8760	129.563	0.407	No	No		66.191	0.62	No	No
8770	122.517	0.511	No	No		69.493	0.642	No	No
8780	140.64	0.393	No	No		60.685	0.467	No	No
8790	132.52	0.493	No	No		52.868	0.374	No	No
8800	139.372	0.441	No	No		51.877	0.413	No	No
8810	139.318	0.461	No	No		60.877	0.419	No	No
8820	156.751	0.489	No	No		43.829	0.491	No	No
8830	147.759	0.505	No	No		40.529	0.428	No	No
8840	160.471	0.489	No	No		47.438	0.376	No	No
8850	145.148	0.472	No	No		35.213	0.393	No	No
8860	102.128	0.657	No	No		42.664	0.385	No	No
8870	83.647	0.636	No	No		70.535	0.431	No	No
8880	93.999	0.533	No	No		44.517	0.371	No	No
8890	121.802	0.484	No	No		65.908	0.401	No	No
8900	63.384	0.407	No	No		59.925	0.418	No	No
8910	68.104	0.464	No	No		62.937	0.41	No	No
8920	91.997	0.353	No	No		66.519	0.407	No	No
8930	49.538	0.358	No	No		42.631	0.445	No	No
8940	108.468	0.317	No	No		89.516	0.387	No	No
8950	113.355	0.422	No	No		101.805	0.301	No	No
8960	96.41	0.391	No	No		103.787	0.423	No	No
8970	110.974	0.524	No	No		74.578	0.373	No	No
8980	90.183	0.398	No	No		101.744	0.406	No	No
8990	89.22	0.493	No	No		57.984	0.402	No	No
9000	57.968	0.38	No	No		48.251	0.431	No	No
9010	95.644	0.367	No	No		69.015	0.394	No	No
9020	94.969	0.502	No	No		84.605	0.385	No	No
9030	69.195	0.413	No	No		74.284	0.439	No	No
9040	117.363	0.355	No	No		44.838	0.52	No	No
9050	90.772	0.379	No	No		66.866	0.508	No	No
9060	79.74	0.384	No	No		88.245	0.454	No	No
9070	78.771	0.387	No	No		47.605	0.446	No	No
9080	95.908	0.374	No	No		92.345	0.447	No	No
9090	63.267	0.35	No	No		93.259	0.584	No	No
9100	69.728	0.368	No	No		46.174	0.592	No	No
9110	87.562	0.327	No	No		46.43	0.496	No	No
9120	123.253	0.325	No	No		77.326	0.508	No	No
9130	65.131	0.328	No	No		43.204	0.441	No	No
9140	114.544	0.325	No	No		93.168	0.473	No	No
9150	72.717	0.39	No	No		81.971	0.523	No	No
9160	127.721	0.351	No	No		57.398	0.582	No	No
9170	41.451	0.401	No	No		53.85	0.533	No	No
9180	95.693	0.342	No	No		44.426	0.534	No	No
9190	52.389	0.355	No	No		92.63	0.57	No	No
9200	97.068	0.331	No	No		81.592	0.494	No	No
9210	94.245	0.407	No	No		51.13	0.532	No	No
9220	69.41	0.35	No	No		35.113	0.643	No	No
9230	84.514	0.377	No	No		48.232	0.584	No	No
9240	89.028	0.339	No	No		43.905	0.553	No	No
9250	93.304	0.335	No	No		35.605	0.532	No	No
9260	52.561	0.328	No	No		48.292	0.583	No	No
9270	88.795	0.383	No	No		54.674	0.58	No	No
9280	117.125	0.321	No	No		53.186	0.531	No	No
9290	70.773	0.311	No	No		42.642	0.564	No	No
9300	70.711	0.405	No	No		36.73	0.588	No	No
9310	73.595	0.356	No	No		54.416	0.593	No	No
9320	109.716	0.369	No	No		76.15	0.589	No	No
9330	77.157	0.347	No	No		61.513	0.602	No	No
9340	62.89	0.322	No	No		52.595	0.619	No	No
9350	77.446	0.366	No	No		56.099	0.592	No	No
9360	73.155	0.396	No	No		49.142	0.594	No	No
9370	67.19	0.328	No	No		51.701	0.56	No	No
9380	78.355	0.334	No	No		52.699	0.561	No	No
9390	71.331	0.322	No	No		61.614	0.596	No	No
9400	87.57	0.36	No	No		44.637	0.516	No	No
9410	73.903	0.419	No	No		49.53	0.546	No	No
9420	97.17	0.42	No	No		53.001	0.575	No	No
9430	79.414	0.306	No	No		60.945	0.558	No	No
9440	81.933	0.347	No	No		47.259	0.577	No	No
9450	79.622	0.425	No	No		83.558	0.536	No	No
9460	63.984	0.39	No	No		49.446	0.555	No	No
9470	49.287	0.358	No	No		45.462	0.448	No	No
9480	57.194	0.374	No	No		62.155	0.469	No	No
9490	103.309	0.334	No	No		90.889	0.498	No	No
9500	77.518	0.309	No	No		84.822	0.571	No	No
9510	86.951	0.331	No	No		25.334	0.685	No	No
9520	77.804	0.334	No	No		55.197	0.651	No	No
9530	65.176	0.415	No	No		47.438	0.645	No	No
9540	75.431	0.356	No	No		35.974	0.656	No	No
9550	62.109	0.38	No	No		42.166	0.65	No	No
9560	74.927	0.317	No	No		68.014	0.695	No	No
9570	71.634	0.408	No	No		56.164	0.741	No	No
9580	66.358	0.313	No	No		51.42	0.741	No	No
9590	63.853	0.318	No	No		34.48	0.671	No	No
9600	66.682	0.345	No	No		49.405	0.674	No	No
9610	36.119	0.335	No	No		26.591	0.538	No	No
9620	61.746	0.343	No	No		42.007	0.534	No	No
9630	45.44	0.317	No	No		52.67	0.45	No	No
9640	75.925	0.32	No	No		46.129	0.58	No	No
9650	59.617	0.364	No	No		38.175	0.594	No	No
9660	65.281	0.387	No	No		40.385	0.547	No	No
9670	44.402	0.332	No	No		36.522	0.472	No	No
9680	81.938	0.356	No	No		43.642	0.541	No	No
9690	52.811	0.321	No	No		56.729	0.598	No	No
9700	58.87	0.347	No	No		37.888	0.498	No	No
9710	66.327	0.328	No	No		48.541	0.561	No	No
9720	61.104	0.382	No	No		25.083	0.612	No	No
9730	31.697	0.322	No	No		55.136	0.683	No	No
9740	39.796	0.339	No	No		25.016	0.55	No	No
9750	55.904	0.373	No	No		58	0.6	No	No
9760	55.802	0.314	No	No		41.592	0.57	No	No
9770	48.55	0.384	No	No		54.186	0.541	No	No
9780	28.34	0.38	No	No		35.895	0.547	No	No
9790	51.523	0.435	No	No		84.985	0.503	No	No
9800	65.836	0.353	No	No		26.192	0.586	No	No
9810	65.836	0.349	No	No		35	0.585	No	No
9820	45.608	0.34	No	No		49.879	0.635	No	No
9830	63.672	0.392	No	No		40.57	0.652	No	No
9840	54.269	0.341	No	No		33.15	0.505	No	No
9850	70.944	0.38	No	No		92.636	0.604	No	No
9860	86.999	0.389	No	No		99.919	0.593	No	No
9870	67.304	0.354	No	No		94.604	0.506	No	No
9880	67.5	0.338	No	No		43.962	0.497	No	No
9890	80.461	0.37	No	No		42.642	0.444	No	No
9900	56.807	0.453	No	No		47.615	0.408	No	No
9910	69.289	0.395	No	No		76.15	0.426	No	No
9920	95.446	0.414	No	No		95.568	0.45	No	No
9930	52.423	0.366	No	No		72.544	0.465	No	No
9940	58.531	0.447	No	No		95.559	0.476	No	No
9950	91.134	0.365	No	No		52.165	0.451	No	No
9960	81.073	0.352	No	No		44.648	0.478	No	No
9970	71.127	0.392	No	No		74.361	0.56	No	No
9980	88.535	0.535	No	No		77.386	0.399	No	No
9990	53.444	0.486	No	No		85.942	0.42	No	No
10000	55.677	0.329	No	No		104.716	0.456	No	No
10010	61.503	0.365	No	No		80.641	0.36	No	No
10020	48.884	0.389	No	No		98.803	0.353	No	No
10030	64.462	0.359	No	No		80.239	0.397	No	No
10040	80.072	0.412	No	No		59.744	0.317	No	No
10050	80.328	0.343	No	No		40.61	0.469	No	No
10060	82.166	0.363	No	No		43.457	0.414	No	No
10070	72.182	0.463	No	No		60.706	0.425	No	No
10080	68.381	0.465	No	No		66.852	0.36	No	No
10090	67.091	0.383	No	No		72.116	0.425	No	No
10100	55.4	0.391	No	No		114.261	0.43	No	No
10110	72.582	0.322	No	No		69.533	0.383	No	No
10120	75.823	0.38	No	No		77.93	0.451	No	No
10130	55.709	0.691	No	No		50.013	0.367	No	No
10140	62.964	0.375	No	No		51.894	0.5	No	No
10150	60.688	0.467	No	No		98.997	0.552	No	No
10160	93.429	0.523	No	No		69.89	0.544	No	No
10170	69.64	0.359	No	No		72.73	0.593	No	No
10180	63.783	0.365	No	No		43.199	0.445	No	No
10190	73.738	0.387	No	No		39.958	0.474	No	No
10200	79.615	0.376	No	No		37.787	0.52	No	No
10210	92.253	0.444	No	No		44.771	0.457	No	No
10220	56.498	0.355	No	No		56.087	0.448	No	No
10230	80.496	0.356	No	No		44.628	0.414	No	No
10240	52.359	0.406	No	No		38.734	0.462	No	No
10250	67.404	0.399	No	No		44.9	0.415	No	No
10260	71.774	0.327	No	No		54.091	0.456	No	No
10270	67.047	0.326	No	No		48.916	0.396	No	No
10280	65.812	0.427	No	No		57.67	0.411	No	No
10290	61.082	0.41	No	No		46.908	0.399	No	No
10300	68.279	0.392	No	No		56.054	0.436	No	No
10310	96.37	0.493	No	No		37.852	0.476	No	No
10320	61.149	0.334	No	No		41.993	0.417	No	No
10330	46.599	0.459	No	No		77.16	0.46	No	No
10340	61.799	0.423	No	No		47.383	0.434	No	No
10350	62.749	0.391	No	No		50.849	0.582	No	No
10360	63.691	0.338	No	No		43.457	0.538	No	No
10370	83.747	0.309	No	No		41.878	0.554	No	No
10380	65.731	0.35	No	No		37.788	0.488	No	No
10390	67.817	0.482	No	No		48.153	0.583	No	No
10400	58.002	0.386	No	No		65.79	0.469	No	No
10410	66.212	0.37	No	No		60.752	0.504	No	No
10420	71.779	0.425	No	No		50.002	0.541	No	No
10430	72.271	0.414	No	No		49.702	0.551	No	No
10440	81.434	0.49	No	No		54.562	0.575	No	No
10450	67.637	0.456	No	No		60.906	0.507	No	No
10460	65.653	0.418	No	No		51.565	0.545	No	No
10470	65.524	0.374	No	No		40.462	0.464	No	No
10480	68.323	0.343	No	No		44.963	0.399	No	No
10490	88.203	0.404	No	No		39.199	0.455	No	No
10500	65.039	0.317	No	No		33.706	0.459	No	No
10510	79.498	0.3	No	No		46.712	0.444	No	No
10520	60.596	0.453	No	No		49.41	0.436	No	No
10530	56.777	0.337	No	No		41.969	0.454	No	No
10540	49.126	0.359	No	No		38.027	0.426	No	No
10550	67.578	0.386	No	No		43.613	0.472	No	No
10560	50.417	0.614	No	No		47.741	0.523	No	No
10570	70.415	0.462	No	No		56.191	0.412	No	No
10580	64.385	0.396	No	No		31.084	0.424	No	No
10590	68.273	0.292	No	No		41.106	0.459	No	No
10600	64.194	0.371	No	No		36.171	0.46	No	No
10610	67.894	0.366	No	No		44.266	0.449	No	No
10620	92.854	0.484	No	No		39.563	0.459	No	No
10630	71.737	0.339	No	No		42.756	0.382	No	No
10640	71.334	0.38	No	No		39.761	0.447	No	No
10650	82.948	0.354	No	No		35.491	0.474	No	No
10660	57.75	0.381	No	No		38.807	0.48	No	No
10670	61.986	0.439	No	No		33.343	0.506	No	No
10680	66.704	0.423	No	No		36.162	0.527	No	No
10690	66.226	0.419	No	No		39.098	0.519	No	No
10700	52.242	0.451	No	No		41.204	0.488	No	No
10710	51.451	0.46	No	No		46.355	0.512	No	No
10720	61.14	0.387	No	No		41.349	0.51	No	No
10730	57.31	0.346	No	No		47.181	0.437	No	No
10740	66.195	0.385	No	No		37.417	0.463	No	No
10750	75.111	0.369	No	No		69.591	0.547	No	No
10760	61.071	0.375	No	No		45.367	0.472	No	No
10770	63.989	0.351	No	No		35.328	0.493	No	No
10780	70.129	0.449	No	No		47.648	0.466	No	No
10790	65.381	0.367	No	No		35.584	0.456	No	No
10800	47.887	0.568	No	No		62.815	0.503	No	No
10810	83.284	0.436	No	No		44.562	0.44	No	No
10820	61.945	0.621	No	No		49.681	0.564	No	No
10830	75.217	0.713	No	No		51.527	0.549	No	No
10840	52.015	0.757	No	No		44.928	0.526	No	No
10850	77.797	0.719	No	No		39.397	0.587	No	No
10860	75.423	0.729	No	No		40.657	0.51	No	No
10870	71.435	0.696	No	No		28.092	0.587	No	No
10880	65.252	0.585	No	No		49.914	0.603	No	No
10890	92.165	0.517	No	No		49.84	0.506	No	No
10900	62.311	0.497	No	No		54.454	0.566	No	No
10910	52.042	0.306	No	No		45.063	0.52	No	No
10920	76.677	0.336	No	No		35.404	0.585	No	No
10930	82.852	0.389	No	No		74.526	0.519	No	No
10940	90.539	0.647	No	No		45.413	0.526	No	No
10950	68.088	0.561	No	No		40.621	0.475	No	No
10960	66.825	0.362	No	No		42.555	0.515	No	No
10970	86.928	0.387	No	No		43.019	0.499	No	No
10980	63.418	0.448	No	No		43.308	0.452	No	No
10990	61.775	0.318	No	No		47.738	0.416	No	No
11000	83.107	0.332	No	No		74.332	0.547	No	No
11010	69.624	0.351	No	No		43.851	0.496	No	No
11020	62.099	0.396	No	No		45.784	0.501	No	No
11030	68.121	0.378	No	No		61.063	0.585	No	No
11040	78.169	0.317	No	No		40.038	0.54	No	No
11050	77.181	0.362	No	No		44.768	0.445	No	No
11060	63.592	0.374	No	No		42.248	0.441	No	No
11070	51.862	0.39	No	No		55.999	0.441	No	No
11080	51.517	0.501	No	No		66.321	0.488	No	No
11090	57.245	0.381	No	No		50.349	0.419	No	No
11100	61.097	0.369	No	No		50.976	0.45	No	No
11110	74.024	0.363	No	No		78.046	0.466	No	No
11120	76.545	0.391	No	No		44.543	0.429	No	No
11130	76.926	0.483	No	No		48.824	0.394	No	No
11140	53.277	0.325	No	No		57.762	0.408	No	No
11150	55.679	0.403	No	No		71.622	0.428	No	No
11160	82.499	0.406	No	No		48.757	0.435	No	No
11170	92.034	0.372	No	No		52.507	0.393	No	No
11180	89.496	0.412	No	No		39.627	0.419	No	No
11190	93.496	0.322	No	No		43.749	0.417	No	No
11200	62.505	0.311	No	No		53.986	0.451	No	No
11210	63.664	0.412	No	No		55.626	0.382	No	No
11220	64.92	0.336	No	No		46.323	0.489	No	No
11230	96.456	0.459	No	No		52.727	0.398	No	No
11240	75.2	0.367	No	No		44.766	0.537	No	No
11250	75.153	0.311	No	No		34.703	0.549	No	No
11260	84.094	0.344	No	No		49.571	0.612	No	No
11270	105.4	0.402	No	No		44.966	0.518	No	No
11280	90.87	0.349	No	No		47.841	0.523	No	No
11290	76.322	0.37	No	No		49.896	0.477	No	No
11300	74.474	0.415	No	No		47.221	0.452	No	No
11310	102.208	0.381	No	No		40.84	0.532	No	No
11320	93.969	0.33	No	No		56.437	0.503	No	No
11330	55.945	0.333	No	No		44.321	0.456	No	No
11340	91.116	0.416	No	No		41.607	0.495	No	No
11350	52.785	0.459	No	No		52.29	0.526	No	No
11360	67.931	0.385	No	No		54.178	0.486	No	No
11370	63.056	0.471	No	No		37.395	0.465	No	No
11380	55.619	0.353	No	No		47.568	0.484	No	No
11390	89.553	0.423	No	No		55.243	0.561	No	No
11400	63.683	0.425	No	No		49.18	0.543	No	No
11410	78.78	0.575	No	No		63.706	0.509	No	No
11420	77.768	0.44	No	No		34.921	0.498	No	No
11430	59.807	0.452	No	No		34.631	0.553	No	No
11440	70.072	0.43	No	No		47.004	0.495	No	No
11450	79.158	0.368	No	No		54.083	0.554	No	No
11460	85.374	0.397	No	No		42.116	0.571	No	No
11470	79.567	0.373	No	No		82.901	0.598	No	No
11480	73.775	0.396	No	No		33.554	0.587	No	No
11490	56.09	0.33	No	No		40.365	0.58	No	No
11500	70.722	0.398	No	No		54.197	0.568	No	No
11510	64.926	0.457	No	No		42.446	0.586	No	No
11520	64.048	0.32	No	No		42.162	0.566	No	No
11530	79.135	0.379	No	No		51.52	0.534	No	No
11540	62.134	0.309	No	No		43.104	0.549	No	No
11550	64.332	0.614	No	No		43.469	0.526	No	No
11560	73.989	0.53	No	No		52.617	0.503	No	No
11570	75.812	0.419	No	No		49.734	0.561	No	No
11580	55.876	0.407	No	No		25.803	0.584	No	No
11590	71.227	0.346	No	No		45.087	0.509	No	No
11600	57.616	0.486	No	No		49.805	0.566	No	No
11610	69.622	0.408	No	No		42.218	0.577	No	No
11620	88.831	0.417	No	No		52.097	0.537	No	No
11630	50.083	0.467	No	No		53.505	0.566	No	No
11640	56.662	0.467	No	No		60.4	0.579	No	No
11650	58.818	0.411	No	No		46.157	0.601	No	No
11660	45.355	0.432	No	No		54.903	0.523	No	No
11670	78.317	0.477	No	No		50.461	0.62	No	No
11680	78.65	0.461	No	No		41.247	0.555	No	No
11690	87.417	0.442	No	No		29.963	0.601	No	No
11700	72.835	0.485	No	No		58.961	0.553	No	No
11710	71.338	0.369	No	No		70.859	0.618	No	No
11720	59.371	0.403	No	No		35.053	0.606	No	No
11730	74.188	0.41	No	No		52.442	0.552	No	No
11740	78.554	0.399	No	No		71.328	0.532	No	No
11750	90.146	0.455	No	No		65.373	0.572	No	No
11760	71.264	0.354	No	No		74.146	0.602	No	No
11770	75.299	0.316	No	No		70.885	0.552	No	No
11780	81.151	0.306	No	No		91.655	0.585	No	No
11790	85.925	0.471	No	No		53.255	0.554	No	No
11800	63.311	0.388	No	No		54.45	0.546	No	No
11810	84.284	0.433	No	No		35.758	0.568	No	No
11820	80.054	0.392	No	No		46.075	0.506	No	No
11830	65.635	0.336	No	No		44.631	0.558	No	No
11840	88.193	0.47	No	No		30.467	0.591	No	No
11850	79.41	0.405	No	No		34.192	0.618	No	No
11860	70.03	0.463	No	No		29.722	0.611	No	No
11870	111.072	0.449	No	No		52.401	0.519	No	No
11880	88.185	0.473	No	No		48.824	0.576	No	No
11890	69.235	0.442	No	No		46.661	0.581	No	No
11900	66.615	0.346	No	No		35.796	0.631	No	No
11910	74.507	0.415	No	No		58.27	0.663	No	No
11920	66.986	0.343	No	No		52.42	0.692	No	No
11930	81.819	0.42	No	No		45.706	0.744	No	No
11940	104.217	0.513	No	No		41.851	0.754	No	No
11950	70.7	0.475	No	No		53.525	0.691	No	No
11960	53.292	0.386	No	No		70.446	0.816	No	No
11970	59.687	0.457	No	No		51.827	0.731	No	No
11980	90.615	0.499	No	No		40.084	0.67	No	No
11990	101.998	0.462	No	No		46.3	0.711	No	No
12000	84.644	0.396	No	No		50.961	0.72	No	No
12010	80.461	0.457	No	No		55.045	0.723	No	No
12020	105.692	0.498	No	No		80.695	0.827	No	No
12030	78.204	0.503	No	No		55.427	0.79	No	No
12040	90.214	0.401	No	No		88.335	0.705	No	No
12050	77.668	0.48	No	No		85.438	0.615	No	No
12060	74.9	0.473	No	No		47.204	0.59	No	No
12070	74.273	0.442	No	No		60.97	0.641	No	No
12080	99.157	0.501	No	No		48.135	0.592	No	No
12090	84.978	0.467	No	No		71.055	0.643	No	No
12100	86.187	0.368	No	No		47.535	0.628	No	No
12110	79.637	0.349	No	No		46.401	0.7	No	No
12120	96.287	0.363	No	No		49.912	0.634	No	No
12130	84.876	0.376	No	No		42.148	0.655	No	No
12140	95.391	0.381	No	No		37.948	0.65	No	No
12150	73.355	0.446	No	No		27.533	0.659	No	No
12160	76.571	0.455	No	No		53.782	0.641	No	No
12170	79.194	0.333	No	No		46.072	0.727	No	No
12180	68.451	0.338	No	No		63.269	0.724	No	No
12190	69.152	0.389	No	No		45.54	0.617	No	No
12200	99.076	0.482	No	No		50.163	0.673	No	No
12210	55.401	0.364	No	No		60.229	0.594	No	No
12220	63.834	0.419	No	No		68.907	0.612	No	No
12230	60.841	0.387	No	No		33.774	0.607	No	No
12240	54.973	0.479	No	No		34.024	0.643	No	No
12250	79.819	0.471	No	No		57.594	0.603	No	No
12260	64.203	0.497	No	No		60.757	0.561	No	No
12270	82.753	0.425	No	No		43.779	0.56	No	No
12280	73.718	0.474	No	No		91.081	0.571	No	No
12290	64.997	0.417	No	No		67.457	0.593	No	No
12300	82.61	0.334	No	No		43.969	0.569	No	No
12310	85.615	0.454	No	No		50.746	0.451	No	No
12320	80.439	0.549	No	No		40.274	0.402	No	No
12330	79.537	0.479	No	No		77.912	0.439	No	No
12340	71.842	0.396	No	No		40.459	0.51	No	No
12350	75.087	0.33	No	No		53.434	0.459	No	No
12360	89.615	0.475	No	No		83.898	0.477	No	No
12370	72.289	0.374	No	No		43.452	0.524	No	No
12380	67.788	0.424	No	No		54.524	0.421	No	No
12390	64.99	0.424	No	No		44.399	0.427	No	No
12400	75.623	0.346	No	No		49.374	0.356	No	No
12410	85.578	0.426	No	No		44.859	0.529	No	No
12420	74.137	0.43	No	No		37.794	0.495	No	No
12430	68.175	0.462	No	No		45.969	0.642	No	No
12440	85.708	0.457	No	No		76.606	0.671	No	No
12450	80.672	0.391	No	No		59.475	0.716	No	No
12460	57.176	0.375	No	No		44.054	0.629	No	No
12470	69.754	0.472	No	No		51.719	0.658	No	No
12480	86.052	0.341	No	No		59.957	0.662	No	No
12490	70.079	0.518	No	No		44.526	0.71	No	No
12500	77.909	0.468	No	No		79.622	0.625	No	No
12510	81.907	0.399	No	No		61.142	0.656	No	No
12520	56.753	0.374	No	No		84.521	0.656	No	No
12530	78.414	0.422	No	No		50.732	0.624	No	No
12540	44.24	0.414	No	No		42.937	0.467	No	No
12550	48.036	0.36	No	No		29.033	0.501	No	No
12560	76.413	0.43	No	No		53.738	0.573	No	No
12570	86.338	0.455	No	No		33.224	0.493	No	No
12580	74.031	0.475	No	No		75.791	0.604	No	No
12590	76.242	0.397	No	No		31.025	0.628	No	No
12600	60.154	0.412	No	No		55.122	0.373	No	No
12610	74.605	0.421	No	No		52.92	0.407	No	No
12620	74.75	0.356	No	No		77.487	0.389	No	No
12630	61.867	0.424	No	No		48.175	0.394	No	No
12640	80.565	0.43	No	No		42.893	0.427	No	No
12650	90.352	0.514	No	No		60.487	0.43	No	No
12660	80.639	0.497	No	No		53.478	0.49	No	No
12670	73.855	0.42	No	No		79.388	0.437	No	No
12680	83.916	0.465	No	No		42.733	0.445	No	No
12690	70.989	0.369	No	No		70.168	0.413	No	No
12700	70.732	0.379	No	No		47.643	0.406	No	No
12710	60.844	0.435	No	No		74.322	0.474	No	No
12720	89.379	0.37	No	No		60.369	0.435	No	No
12730	65.646	0.412	No	No		42.34	0.447	No	No
12740	71.963	0.452	No	No		67.675	0.409	No	No
12750	81.82	0.344	No	No		37.595	0.447	No	No
12760	58.771	0.5	No	No		48.621	0.402	No	No
12770	66.285	0.448	No	No		64.181	0.489	No	No
12780	88.121	0.366	No	No		67.187	0.505	No	No
12790	87.379	0.343	No	No		56.231	0.464	No	No
12800	77.538	0.384	No	No		66.082	0.496	No	No
12810	52.146	0.503	No	No		69.622	0.47	No	No
12820	77.737	0.346	No	No		90.968	0.487	No	No
12830	90.037	0.44	No	No		53.108	0.42	No	No
12840	75.241	0.338	No	No		53.746	0.426	No	No
12850	59.852	0.321	No	No		52.941	0.437	No	No
12860	75.293	0.34	No	No		76.698	0.428	No	No
12870	91.154	0.425	No	No		84.288	0.569	No	No
12880	87.744	0.337	No	No		63.284	0.577	No	No
12890	78.798	0.375	No	No		46.184	0.523	No	No
12900	71.851	0.396	No	No		51.975	0.574	No	No
12910	68.718	0.371	No	No		40.911	0.535	No	No
12920	72.756	0.379	No	No		54.462	0.606	No	No
12930	85.578	0.454	No	No		37.636	0.52	No	No
12940	71.771	0.464	No	No		72.458	0.535	No	No
12950	66.632	0.421	No	No		53.858	0.588	No	No
12960	71.542	0.424	No	No		93.247	0.549	No	No
12970	84.95	0.332	No	No		66.043	0.549	No	No
12980	75.132	0.382	No	No		82.271	0.528	No	No
12990	80.585	0.467	No	No		61.512	0.553	No	No
13000	67.938	0.422	No	No		90.712	0.419	No	No
13010	85.076	0.456	No	No		78.071	0.467	No	No
13020	87.492	0.41	No	No		69.921	0.539	No	No
13030	63.44	0.448	No	No		88.074	0.532	No	No
13040	54.096	0.418	No	No		67.927	0.533	No	No
13050	60.735	0.327	No	No		95.928	0.47	No	No
13060	84.912	0.411	No	No		80.082	0.506	No	No
13070	84.621	0.379	No	No		71.55	0.528	No	No
13080	81.042	0.455	No	No		28.809	0.477	No	No
13090	89.942	0.485	No	No		100.02	0.546	No	No
13100	95.923	0.522	No	No		68.269	0.488	No	No
13110	57.992	0.392	No	No		80.107	0.545	No	No
13120	86.228	0.425	No	No		87.731	0.464	No	No
13130	113.597	0.433	No	No		44.8	0.52	No	No
13140	72.997	0.442	No	No		59.079	0.491	No	No
13150	94.709	0.583	No	No		85.598	0.552	No	No
13160	72.333	0.333	No	No		83.837	0.553	No	No
13170	74.336	0.519	No	No		78.681	0.53	No	No
13180	62.457	0.456	No	No		50.976	0.567	No	No
13190	64.463	0.399	No	No		69.145	0.562	No	No
13200	68.035	0.418	No	No		42.389	0.542	No	No
13210	63.564	0.505	No	No		50.79	0.475	No	No
13220	87.843	0.479	No	No		79.33	0.551	No	No
13230	79.564	0.456	No	No		57.179	0.448	No	No
13240	83.719	0.47	No	No		70.873	0.501	No	No
13250	67.234	0.459	No	No		78.657	0.517	No	No
13260	70.07	0.453	No	No		65.963	0.534	No	No
13270	55.46	0.442	No	No		77.816	0.425	No	No
13280	49.178	0.4	No	No		70.333	0.373	No	No
13290	55.189	0.344	No	No		67.959	0.388	No	No
13300	73.19	0.409	No	No		78.6	0.497	No	No
13310	63.681	0.402	No	No		92.352	0.464	No	No
13320	74.185	0.384	No	No		96.995	0.455	No	No
13330	47.428	0.305	No	No		60.52	0.421	No	No
13340	63.102	0.347	No	No		42.936	0.52	No	No
13350	55.449	0.349	No	No		102.168	0.52	No	No
13360	46.899	0.304	No	No		59.422	0.49	No	No
13370	57.561	0.294	No	No		80.063	0.497	No	No
13380	63.323	0.371	No	No		47.568	0.51	No	No
13390	53.312	0.323	No	No		34.239	0.539	No	No
13400	88.965	0.395	No	No		76.2	0.509	No	No
13410	78.269	0.475	No	No		71.195	0.487	No	No
13420	73.995	0.306	No	No		104.869	0.604	No	No
13430	72.17	0.324	No	No		86.335	0.548	No	No
13440	82.117	0.398	No	No		101.849	0.514	No	No
13450	82.909	0.393	No	No		80.649	0.516	No	No
13460	75.965	0.387	No	No		72.309	0.571	No	No
13470	56.393	0.375	No	No		35.956	0.525	No	No
13480	65.429	0.348	No	No		64.685	0.535	No	No
13490	56.65	0.462	No	No		41.92	0.463	No	No
13500	83.255	0.428	No	No		92.374	0.452	No	No
13510	61.788	0.315	No	No		96.984	0.54	No	No
13520	75.717	0.386	No	No		44.409	0.489	No	No
13530	54.822	0.379	No	No		50.522	0.475	No	No
13540	95.545	0.441	No	No		77.239	0.537	No	No
13550	65.153	0.382	No	No		64.844	0.502	No	No
13560	82.261	0.416	No	No		60.963	0.485	No	No
13570	43.337	0.34	No	No		40.029	0.502	No	No
13580	64.041	0.394	No	No		74.396	0.503	No	No
13590	90.693	0.323	No	No		74.185	0.565	No	No
13600	51.939	0.326	No	No		55.776	0.589	No	No
13610	72.701	0.407	No	No		56.632	0.562	No	No
13620	45.25	0.346	No	No		35.989	0.528	No	No
13630	75.948	0.314	No	No		40.732	0.477	No	No
13640	77.675	0.317	No	No		56.075	0.601	No	No
13650	75.036	0.41	No	No		64.647	0.597	No	No
13660	74.844	0.333	No	No		48.551	0.6	No	No
13670	79.026	0.331	No	No		59.808	0.567	No	No
13680	85.437	0.382	No	No		46.771	0.613	No	No
13690	90.129	0.467	No	No		40.202	0.632	No	No
13700	79.8	0.462	No	No		47.338	0.65	No	No
13710	63.185	0.432	No	No		43.719	0.459	No	No
13720	80.061	0.304	No	No		44.152	0.558	No	No
13730	76.903	0.433	No	No		50.301	0.562	No	No
13740	63.694	0.301	No	No		39.111	0.535	No	No
13750	54.033	0.349	No	No		42.838	0.614	No	No
13760	65.919	0.427	No	No		50.696	0.523	No	No
13770	73.729	0.385	No	No		38.296	0.566	No	No
13780	77.26	0.351	No	No		60.043	0.519	No	No
13790	68.277	0.343	No	No		60.208	0.567	No	No
13800	74.712	0.47	No	No		50.529	0.591	No	No
13810	66.528	0.347	No	No		51.744	0.571	No	No
13820	80.426	0.467	No	No		41.2	0.539	No	No
13830	66.145	0.309	No	No		53.497	0.542	No	No
13840	61.985	0.387	No	No		47.321	0.517	No	No
13850	68.634	0.314	No	No		79.597	0.498	No	No
13860	65.177	0.292	No	No		38.159	0.562	No	No
13870	77.333	0.334	No	No		65.953	0.558	No	No
13880	58.33	0.368	No	No		40.435	0.552	No	No
13890	97.319	0.512	No	No		68.387	0.517	No	No
13900	65.403	0.376	No	No		62.973	0.66	No	No
13910	56.948	0.447	No	No		69.303	0.621	No	No
13920	70.506	0.355	No	No		57.026	0.689	No	No
13930	81.336	0.426	No	No		66.875	0.57	No	No
13940	37.386	0.332	No	No		50.242	0.544	No	No
13950	51.756	0.315	No	No		60.312	0.588	No	No
13960	69.943	0.373	No	No		37.178	0.624	No	No
13970	70.943	0.361	No	No		45.037	0.648	No	No
13980	80.955	0.324	No	No		39.707	0.612	No	No
13990	83.594	0.453	No	No		46.114	0.632	No	No
14000	96.348	0.443	No	No		31.334	0.588	No	No
14010	81.978	0.445	No	No		74.817	0.655	No	No
14020	93.81	0.469	No	No		82.719	0.68	No	No
14030	73.016	0.443	No	No		111.199	0.616	No	No
14040	73.05	0.36	No	No		120.276	0.63	No	No
14050	86.606	0.36	No	No		110.702	0.707	No	No
14060	77.374	0.356	No	No		103.84	0.628	No	No
14070	60.758	0.383	No	No		114.563	0.666	No	No
14080	53.09	0.304	No	No		94.162	0.661	No	No
14090	111.634	0.438	No	No		95.363	0.632	No	No
14100	65.106	0.351	No	No		43.499	0.619	No	No
14110	86.153	0.456	No	No		62.657	0.611	No	No
14120	62.508	0.343	No	No		101.164	0.619	No	No
14130	80.684	0.451	No	No		100.191	0.666	No	No
14140	68.599	0.425	No	No		83.237	0.689	No	No
14150	92.546	0.489	No	No		81.04	0.616	No	No
14160	71.819	0.368	No	No		80.152	0.613	No	No
14170	63.042	0.305	No	No		70.58	0.493	No	No
14180	81.88	0.373	No	No		48.749	0.371	No	No
14190	86.954	0.511	No	No		52.834	0.435	No	No
14200	99.51	0.48	No	No		89.006	0.402	No	No
14210	77.514	0.405	No	No		81.421	0.504	No	No
14220	79.885	0.373	No	No		100.56	0.475	No	No
14230	67.117	0.47	No	No		113.141	0.423	No	No
14240	72.803	0.304	No	No		94.729	0.447	No	No
14250	53.298	0.324	No	No		110.93	0.465	No	No
14260	74.383	0.377	No	No		67.421	0.468	No	No
14270	80.536	0.389	No	No		90.501	0.543	No	No
14280	61.488	0.362	No	No		87.891	0.539	No	No
14290	103.573	0.348	No	No		94.823	0.443	No	No
14300	73.587	0.456	No	No		101.717	0.568	No	No
14310	59.804	0.423	No	No		94.491	0.616	No	No
14320	70.83	0.429	No	No		69.474	0.577	No	No
14330	70.463	0.494	No	No		73.567	0.604	No	No
14340	78.784	0.404	No	No		55.027	0.476	No	No
14350	75.942	0.393	No	No		76.971	0.571	No	No
14360	75.302	0.347	No	No		87.062	0.51	No	No
14370	50.489	0.461	No	No		94.042	0.664	No	No
14380	83.113	0.413	No	No		11.611	0.624	No	No
14390	86.701	0.307	No	No		53.802	0.632	No	No
14400	67.711	0.474	No	No		86.492	0.543	No	No
14410	76.946	0.328	No	No		83.016	0.624	No	No
14420	71.155	0.413	No	No		53.826	0.632	No	No
14430	55.107	0.331	No	No		95.396	0.575	No	No
14440	77.178	0.363	No	No		47.015	0.597	No	No
14450	71.943	0.343	No	No		52.586	0.601	No	No
14460	85.876	0.368	No	No		47.068	0.601	No	No
14470	55.251	0.394	No	No		67.001	0.559	No	No
14480	77.196	0.346	No	No		73.177	0.567	No	No
14490	81.768	0.415	No	No		65.563	0.578	No	No
14500	74.001	0.399	No	No		85.237	0.636	No	No
14510	80.88	0.427	No	No		82.052	0.743	No	No
14520	74.011	0.382	No	No		65.232	0.658	No	No
14530	81.633	0.336	No	No		36.703	0.709	No	No
14540	69.196	0.391	No	No		51.547	0.66	No	No
14550	88.629	0.432	No	No		45.292	0.7	No	No
14560	86.679	0.355	No	No		52.74	0.701	No	No
14570	73.506	0.363	No	No		35.525	0.637	No	No
14580	90.939	0.399	No	No		41.503	0.652	No	No
14590	76.374	0.347	No	No		48.733	0.633	No	No
14600	95.186	0.364	No	No		45.756	0.658	No	No
14610	86.436	0.372	No	No		43.28	0.691	No	No
14620	90.249	0.345	No	No		65.362	0.674	No	No
14630	84.316	0.344	No	No		41.115	0.713	No	No
14640	87.904	0.439	No	No		41.242	0.735	No	No
14650	69.473	0.412	No	No		40.477	0.683	No	No
14660	84.581	0.329	No	No		63.186	0.644	No	No
14670	83.848	0.46	No	No		62.862	0.751	No	No
14680	84.785	0.411	No	No		56.267	0.735	No	No
14690	90.77	0.392	No	No		62.886	0.732	No	No
14700	84.765	0.445	No	No		65.063	0.707	No	No
14710	86.879	0.388	No	No		60.224	0.761	No	No
14720	87.414	0.443	No	No		61.657	0.712	No	No
14730	86.759	0.479	No	No		65.288	0.685	No	No
14740	74.74	0.354	No	No		69.788	0.692	No	No
14750	79.823	0.407	No	No		73.916	0.68	No	No
14760	73.476	0.357	No	No		80.229	0.675	No	No
14770	101.937	0.386	No	No		71.514	0.68	No	No
14780	85.439	0.361	No	No		65.075	0.667	No	No
14790	77.229	0.343	No	No		73.197	0.665	No	No
14800	78.431	0.352	No	No		83.927	0.746	No	No
14810	62.335	0.383	No	No		69.205	0.73	No	No
14820	68.887	0.349	No	No		65.331	0.693	No	No
14830	66.91	0.366	No	No		63.636	0.708	No	No
14840	85.534	0.374	No	No		50.441	0.674	No	No
14850	70.351	0.316	No	No		85.851	0.688	No	No
14860	97.957	0.303	No	No		69.251	0.71	No	No
14870	82.531	0.369	No	No		57.441	0.745	No	No
14880	114.049	0.345	No	No		51.708	0.659	No	No
14890	101.946	0.331	No	No		38.104	0.701	No	No
14900	83.7	0.318	No	No		62.209	0.674	No	No
14910	83.036	0.331	No	No		68.391	0.724	No	No
14920	77.395	0.333	No	No		57.103	0.64	No	No
14930	86.475	0.326	No	No		75.207	0.698	No	No
14940	68.6	0.476	No	No		71.338	0.647	No	No
14950	67.361	0.388	No	No		71.432	0.731	No	No
14960	98.219	0.338	No	No		80.072	0.705	No	No
14970	79.024	0.348	No	No		76.707	0.748	No	No
14980	88.79	0.329	No	No		83.031	0.702	No	No
14990	91.942	0.402	No	No		78.712	0.619	No	No
15000	79.018	0.33	No	No		80.883	0.658	No	No
15010	82.953	0.406	No	No		69.745	0.616	No	No
15020	89.984	0.405	No	No		54.03	0.455	No	No
15030	86.219	0.341	No	No		82.034	0.495	No	No
15040	73.593	0.369	No	No		56.463	0.522	No	No
15050	88.663	0.435	No	No		62.914	0.49	No	No
15060	77.804	0.385	No	No		69.367	0.521	No	No
15070	77.674	0.362	No	No		38.829	0.426	No	No
15080	105.248	0.453	No	No		48.659	0.459	No	No
15090	77.448	0.321	No	No		59.579	0.439	No	No
15100	74.822	0.372	No	No		51.662	0.515	No	No
15110	76.54	0.368	No	No		83.946	0.438	No	No
15120	77.632	0.405	No	No		43.862	0.522	No	No
15130	66.48	0.324	No	No		47.092	0.4	No	No
15140	75.535	0.348	No	No		61.866	0.393	No	No
15150	90.776	0.368	No	No		66.082	0.515	No	No
15160	71.298	0.343	No	No		62.703	0.516	No	No
15170	61.609	0.317	No	No		39.693	0.408	No	No
15180	72.299	0.414	No	No		45.217	0.425	No	No
15190	73.393	0.392	No	No		67.958	0.509	No	No
15200	65.008	0.313	No	No		91.868	0.496	No	No
15210	75.881	0.342	No	No		88.186	0.505	No	No
15220	54.668	0.325	No	No		57.215	0.441	No	No
15230	81.904	0.335	No	No		60.879	0.461	No	No
15240	65.661	0.504	No	No		67.286	0.463	No	No
15250	85.109	0.38	No	No		49.794	0.409	No	No
15260	90.119	0.47	No	No		46.067	0.455	No	No
15270	75.194	0.378	No	No		45.752	0.459	No	No
15280	66.198	0.405	No	No		45.372	0.451	No	No
15290	83.438	0.351	No	No		52.252	0.366	No	No
15300	60.797	0.391	No	No		41.282	0.452	No	No
15310	74.706	0.342	No	No		64.627	0.393	No	No
15320	70.318	0.329	No	No		52.804	0.47	No	No
15330	56.445	0.353	No	No		85.476	0.495	No	No
15340	59.862	0.402	No	No		40.107	0.432	No	No
15350	93.817	0.347	No	No		69.69	0.477	No	No
15360	91.908	0.382	No	No		55.633	0.455	No	No
15370	66.307	0.383	No	No		60.233	0.467	No	No
15380	71.843	0.343	No	No		50.282	0.459	No	No
15390	69.912	0.417	No	No		48.507	0.428	No	No
15400	57.415	0.487	No	No		39.815	0.415	No	No
15410	83.454	0.319	No	No		30.086	0.453	No	No
15420	68.219	0.377	No	No		50.164	0.433	No	No
15430	70.553	0.383	No	No		57.924	0.415	No	No
15440	79.15	0.405	No	No		47.133	0.449	No	No
15450	77.425	0.378	No	No		53.603	0.484	No	No
15460	65.678	0.377	No	No		79.518	0.481	No	No
15470	72.84	0.316	No	No		54.488	0.399	No	No
15480	83.102	0.366	No	No		40.136	0.443	No	No
15490	77.702	0.35	No	No		56.084	0.48	No	No
15500	85.76	0.434	No	No		65.946	0.611	No	No
15510	65.67	0.37	No	No		74.824	0.64	No	No
15520	75.964	0.342	No	No		71.479	0.657	No	No
15530	87.217	0.402	No	No		77.226	0.696	No	No
15540	67.043	0.403	No	No		60.125	0.675	No	No
15550	64.756	0.394	No	No		55.803	0.697	No	No
15560	76.872	0.412	No	No		53.686	0.681	No	No
15570	55.791	0.385	No	No		41.79	0.74	No	No
15580	61.447	0.35	No	No		75.842	0.675	No	No
15590	77.037	0.396	No	No		36.865	0.633	No	No
15600	75.81	0.451	No	No		51.514	0.673	No	No
15610	75.537	0.356	No	No		68.491	0.733	No	No
15620	80.795	0.297	No	No		74.87	0.748	No	No
15630	63.803	0.422	No	No		56.517	0.591	No	No
15640	61.222	0.423	No	No		50.161	0.636	No	No
15650	71.269	0.376	No	No		68.257	0.585	No	No
15660	59.458	0.412	No	No		81.062	0.685	No	No
15670	54.297	0.406	No	No		48.254	0.624	No	No
15680	76.442	0.353	No	No		46.545	0.67	No	No
15690	78.093	0.379	No	No		52.384	0.62	No	No
15700	60.583	0.375	No	No		44.244	0.668	No	No
15710	97.193	0.333	No	No		42.543	0.643	No	No
15720	83.266	0.343	No	No		51.764	0.586	No	No
15730	65.748	0.308	No	No		63.556	0.602	No	No
15740	78.847	0.322	No	No		48.135	0.601	No	No
15750	79.709	0.368	No	No		40.274	0.578	No	No
15760	73.733	0.331	No	No		46.958	0.552	No	No
15770	74.874	0.327	No	No		63.935	0.48	No	No
15780	79.599	0.363	No	No		52.351	0.513	No	No
15790	72.686	0.314	No	No		59.662	0.575	No	No
15800	61.645	0.348	No	No		49.633	0.666	No	No
15810	90.316	0.367	No	No		63.735	0.628	No	No
15820	92.943	0.342	No	No		60.2	0.662	No	No
15830	61.195	0.37	No	No		39.888	0.646	No	No
15840	68.119	0.305	No	No		34.139	0.579	No	No
15850	80.511	0.323	No	No		45.912	0.61	No	No
15860	78.318	0.379	No	No		60.596	0.584	No	No
15870	85.064	0.334	No	No		73.629	0.627	No	No
15880	89.241	0.374	No	No		55.705	0.632	No	No
15890	71.961	0.307	No	No		80.859	0.618	No	No
15900	52.338	0.347	No	No		56.853	0.58	No	No
15910	81.616	0.366	No	No		61.882	0.674	No	No
15920	70.386	0.419	No	No		43.562	0.603	No	No
15930	67.133	0.369	No	No		53.827	0.589	No	No
15940	58.554	0.369	No	No		38.491	0.638	No	No
15950	73.019	0.398	No	No		46.767	0.58	No	No
15960	63.451	0.351	No	No		61.669	0.59	No	No
15970	83.596	0.312	No	No		45.972	0.577	No	No
15980	58.489	0.427	No	No		41.643	0.559	No	No
15990	68.325	0.386	No	No		38.863	0.649	No	No
16000	68.974	0.337	No	No		42.57	0.662	No	No
16010	76.455	0.362	No	No		83.667	0.604	No	No
16020	76.977	0.349	No	No		66.175	0.62	No	No
16030	81.697	0.357	No	No		72.234	0.557	No	No
16040	82.499	0.403	No	No		62.747	0.618	No	No
16050	70.932	0.397	No	No		72.574	0.574	No	No
16060	73.918	0.354	No	No		44.711	0.586	No	No
16070	92.647	0.407	No	No		84.401	0.54	No	No
16080	70.329	0.394	No	No		49.679	0.566	No	No
16090	81.499	0.481	No	No		47.721	0.542	No	No
16100	71.366	0.473	No	No		67.803	0.507	No	No
16110	63.355	0.4	No	No		75.011	0.563	No	No
16120	71.99	0.405	No	No		40.368	0.571	No	No
16130	79.018	0.343	No	No		44.762	0.592	No	No
16140	66.478	0.388	No	No		50.266	0.557	No	No
16150	68.027	0.458	No	No		37.609	0.484	No	No
16160	64.478	0.392	No	No		48.426	0.517	No	No
16170	75.375	0.36	No	No		47.565	0.546	No	No
16180	55.626	0.374	No	No		40.677	0.59	No	No
16190	47.301	0.344	No	No		75.055	0.633	No	No
16200	57.048	0.341	No	No		23.264	0.617	No	No
16210	62.356	0.393	No	No		42.017	0.568	No	No
16220	80.909	0.363	No	No		54.74	0.603	No	No
16230	54.335	0.314	No	No		87.323	0.651	No	No
16240	62.678	0.373	No	No		69.015	0.621	No	No
16250	66.298	0.422	No	No		58.613	0.572	No	No
16260	65.255	0.386	No	No		53.681	0.576	No	No
16270	90.489	0.483	No	No		67.697	0.642	No	No
16280	92.971	0.387	No	No		64.294	0.379	No	No
16290	59.608	0.392	No	No		60.717	0.386	No	No
16300	93.45	0.428	No	No		64.471	0.418	No	No
16310	67.899	0.451	No	No		75.112	0.541	No	No
16320	90.53	0.371	No	No		54.65	0.389	No	No
16330	77.725	0.391	No	No		35.156	0.591	No	No
16340	67.157	0.419	No	No		75.985	0.514	No	No
16350	79.547	0.421	No	No		69.088	0.415	No	No
16360	59.108	0.336	No	No		50.62	0.404	No	No
16370	85.599	0.373	No	No		56.257	0.387	No	No
16380	86.289	0.404	No	No		46.022	0.413	No	No
16390	63.235	0.483	No	No		72.959	0.502	No	No
16400	91.849	0.466	No	No		62.894	0.575	No	No
16410	77.501	0.42	No	No		76.942	0.39	No	No
16420	90.963	0.397	No	No		51.714	0.374	No	No
16430	76.221	0.323	No	No		71.59	0.45	No	No
16440	73.933	0.436	No	No		54.618	0.476	No	No
16450	87.453	0.401	No	No		51.474	0.369	No	No
16460	72.779	0.426	No	No		50.049	0.548	No	No
16470	74.336	0.509	No	No		49.046	0.58	No	No
16480	70.558	0.384	No	No		44.108	0.553	No	No
16490	75.379	0.449	No	No		46.104	0.381	No	No
16500	81.538	0.416	No	No		59.638	0.382	No	No
16510	63.476	0.441	No	No		62.159	0.368	No	No
16520	68.005	0.446	No	No		46.691	0.42	No	No
16530	88.754	0.47	No	No		64.585	0.407	No	No
16540	80.792	0.373	No	No		96.024	0.413	No	No
16550	82.743	0.318	No	No		68.117	0.4	No	No
16560	68.473	0.487	No	No		45.198	0.37	No	No
16570	66.397	0.522	No	No		66.201	0.466	No	No
16580	55.75	0.332	No	No		52.392	0.439	No	No
16590	79.212	0.421	No	No		57.239	0.384	No	No
16600	90.042	0.513	No	No		94.226	0.377	No	No
16610	65.627	0.356	No	No		83.414	0.429	No	No
16620	61.118	0.401	No	No		70.268	0.366	No	No
16630	71.247	0.498	No	No		54.825	0.349	No	No
16640	64.944	0.512	No	No		70.224	0.404	No	No
16650	62.053	0.483	No	No		62.66	0.435	No	No
16660	80.364	0.383	No	No		88.763	0.43	No	No
16670	84.072	0.408	No	No		45.086	0.554	No	No
16680	65.356	0.462	No	No		48.63	0.52	No	No
16690	84.337	0.37	No	No		37.27	0.626	No	No
16700	66.439	0.498	No	No		53.085	0.598	No	No
16710	72.334	0.435	No	No		45.771	0.606	No	No
16720	81.425	0.41	No	No		26.337	0.6	No	No
16730	73.108	0.396	No	No		29.693	0.628	No	No
16740	90.874	0.334	No	No		54.358	0.559	No	No
16750	85.424	0.422	No	No		39.514	0.62	No	No
16760	82.23	0.415	No	No		91.956	0.635	No	No
16770	82.275	0.462	No	No		57.947	0.603	No	No
16780	73.643	0.499	No	No		53.184	0.541	No	No
16790	91.453	0.594	No	No		50.909	0.601	No	No
16800	105.287	0.473	No	No		76.762	0.637	No	No
16810	69.353	0.454	No	No		69.754	0.549	No	No
16820	74.522	0.541	No	No		93.001	0.566	No	No
16830	60.163	0.34	No	No		71.956	0.571	No	No
16840	87.829	0.527	No	No		60.276	0.542	No	No
16850	59.126	0.421	No	No		62.432	0.614	No	No
16860	76.548	0.408	No	No		67.443	0.583	No	No
16870	83.942	0.444	No	No		83.56	0.598	No	No
16880	65.854	0.324	No	No		74.421	0.561	No	No
16890	125.104	0.4	No	No		69.862	0.6	No	No
16900	98.544	0.452	No	No		81.128	0.598	No	No
16910	102.619	0.501	No	No		94.033	0.637	No	No
16920	72.539	0.425	No	No		73.091	0.64	No	No
16930	119.436	0.469	No	No		87.073	0.609	No	No
16940	106.746	0.526	No	No		49.003	0.604	No	No
16950	101.926	0.504	No	No		50.099	0.569	No	No
16960	88.252	0.46	No	No		54.166	0.561	No	No
16970	82.837	0.467	No	No		40.803	0.559	No	No
16980	80.089	0.342	No	No		43.286	0.632	No	No
16990	55.408	0.642	No	No		79.812	0.628	No	No
17000	110.13	0.487	No	No		43.361	0.592	No	No
17010	66.099	0.337	No	No		37	0.583	No	No
17020	105.224	0.481	No	No		40.642	0.673	No	No
17030	82.667	0.351	No	No		58.428	0.623	No	No
17040	81.241	0.373	No	No		63.528	0.659	No	No
17050	82.627	0.47	No	No		37.956	0.474	No	No
17060	61.093	0.467	No	No		54	0.597	No	No
17070	91.679	0.537	No	No		51.447	0.522	No	No
17080	70.802	0.509	No	No		46.296	0.557	No	No
17090	100.85	0.41	No	No		64.143	0.552	No	No
17100	82.836	0.475	No	No		34.46	0.581	No	No
17110	94.531	0.342	No	No		43.578	0.566	No	No
17120	76.468	0.411	No	No		45.331	0.484	No	No
17130	79.269	0.427	No	No		35.609	0.556	No	No
17140	80.08	0.372	No	No		42.645	0.524	No	No
17150	88.268	0.354	No	No		87.98	0.576	No	No
17160	90.466	0.455	No	No		35.121	0.568	No	No
17170	73.712	0.332	No	No		61.88	0.572	No	No
17180	72.837	0.412	No	No		50.499	0.569	No	No
17190	87.453	0.427	No	No		65.204	0.585	No	No
17200	92.955	0.347	No	No		32.166	0.559	No	No
17210	77.34	0.348	No	No		34.613	0.535	No	No
17220	72.759	0.391	No	No		55.74	0.495	No	No
17230	72.047	0.401	No	No		54.693	0.432	No	No
17240	99.102	0.397	No	No		55.45	0.462	No	No
17250	78.896	0.33	No	No		51.342	0.543	No	No
17260	81.326	0.344	No	No		72.636	0.456	No	No
17270	77.977	0.379	No	No		62.094	0.442	No	No
17280	88.706	0.407	No	No		56.727	0.497	No	No
17290	62.795	0.326	No	No		56.102	0.486	No	No
17300	69.084	0.347	No	No		63.174	0.49	No	No
17310	68.6	0.38	No	No		53.567	0.524	No	No
17320	77.031	0.332	No	No		54.372	0.53	No	No
17330	100.735	0.478	No	No		53.757	0.444	No	No
17340	63.47	0.374	No	No		60.472	0.538	No	No
17350	75.158	0.399	No	No		50.958	0.516	No	No
17360	75.262	0.45	No	No		55.116	0.471	No	No
17370	92.328	0.528	No	No		70.588	0.551	No	No
17380	56.01	0.365	No	No		60.088	0.554	No	No
17390	76.593	0.363	No	No		18.331	0.516	No	No
17400	86.2	0.375	No	No		50.703	0.534	No	No
17410	93.801	0.434	No	No		34.925	0.569	No	No
17420	71.168	0.377	No	No		41.075	0.593	No	No
17430	66.816	0.44	No	No		57.118	0.547	No	No
17440	71.79	0.328	No	No		85.997	0.539	No	No
17450	96.932	0.358	No	No		57.76	0.566	No	No
17460	73.853	0.383	No	No		66.591	0.539	No	No
17470	96.984	0.359	No	No		43.541	0.443	No	No
17480	82.268	0.369	No	No		51.637	0.494	No	No
17490	64.4	0.369	No	No		54.329	0.504	No	No
17500	66.085	0.416	No	No		60.833	0.555	No	No
17510	74.746	0.429	No	No		59.718	0.522	No	No
17520	84.938	0.354	No	No		44.275	0.526	No	No
17530	82.294	0.365	No	No		76.689	0.54	No	No
17540	61.146	0.355	No	No		72.063	0.54	No	No
17550	74.746	0.431	No	No		55.201	0.549	No	No
17560	100.268	0.389	No	No		51.096	0.576	No	No
17570	55.691	0.477	No	No		63.786	0.509	No	No
17580	83.757	0.38	No	No		63.605	0.496	No	No
17590	82.441	0.463	No	No		58.814	0.59	No	No
17600	81.457	0.316	No	No		41.94	0.563	No	No
17610	64.652	0.388	No	No		73.724	0.494	No	No
17620	55.312	0.495	No	No		85.383	0.508	No	No
17630	94.509	0.369	No	No		73.015	0.511	No	No
17640	76.672	0.404	No	No		48.013	0.505	No	No
17650	84.003	0.39	No	No		70.361	0.527	No	No
17660	79.736	0.511	No	No		64.209	0.525	No	No
17670	83.457	0.399	No	No		57.434	0.545	No	No
17680	80.997	0.388	No	No		45.732	0.536	No	No
17690	93.625	0.43	No	No		74.118	0.512	No	No
17700	90.939	0.43	No	No		74.228	0.563	No	No
17710	87.357	0.492	No	No		52.653	0.547	No	No
17720	91.735	0.448	No	No		70.582	0.603	No	No
17730	68.047	0.497	No	No		77.977	0.611	No	No
17740	78.969	0.337	No	No		46.953	0.514	No	No
17750	69.232	0.43	No	No		62.886	0.507	No	No
17760	72.325	0.448	No	No		74.359	0.56	No	No
17770	57.674	0.464	No	No		83.806	0.513	No	No
17780	55.657	0.375	No	No		57.692	0.514	No	No
17790	56.498	0.368	No	No		52.878	0.551	No	No
17800	78.027	0.399	No	No		64	0.557	No	No
17810	89.132	0.381	No	No		54.241	0.521	No	No
17820	72.125	0.368	No	No		81.627	0.538	No	No
17830	79.128	0.363	No	No		42.437	0.487	No	No
17840	81.212	0.422	No	No		73.911	0.563	No	No
17850	80.83	0.382	No	No		63.688	0.601	No	No
17860	63.242	0.45	No	No		51.895	0.571	No	No
17870	86.788	0.455	No	No		39.738	0.546	No	No
17880	70.507	0.439	No	No		55.432	0.587	No	No
17890	74.538	0.464	No	No		38.505	0.622	No	No
17900	83.629	0.489	No	No		54.046	0.587	No	No
17910	59.959	0.439	No	No		70.291	0.552	No	No
17920	79.09	0.355	No	No		44.832	0.583	No	No
17930	80.641	0.411	No	No		52.251	0.509	No	No
17940	74.802	0.447	No	No		72.249	0.47	No	No
17950	69.867	0.404	No	No		65.33	0.568	No	No
17960	86.208	0.345	No	No		53.185	0.594	No	No
17970	88.471	0.415	No	No		57.039	0.588	No	No
17980	69.617	0.399	No	No		43.698	0.599	No	No
17990	94.195	0.322	No	No		98.382	0.599	No	No
18000	85.47	0.451	No	No		50.274	0.545	No	No
18010	87.197	0.358	No	No		24.567	0.528	No	No
18020	67.276	0.442	No	No		50.826	0.607	No	No
18030	89.018	0.445	No	No		42.781	0.488	No	No
18040	74.634	0.471	No	No		41.972	0.568	No	No
18050	116.044	0.413	No	No		50.457	0.479	No	No
18060	77.385	0.374	No	No		44.634	0.423	No	No
18070	100.883	0.432	No	No		48.619	0.488	No	No
18080	80.324	0.357	No	No		39.122	0.46	No	No
18090	88.051	0.33	No	No		35.876	0.488	No	No
18100	74.772	0.435	No	No		36.786	0.502	No	No
18110	83.125	0.366	No	No		53.911	0.534	No	No
18120	59.08	0.363	No	No		63.721	0.541	No	No
18130	56.898	0.353	No	No		66.68	0.659	No	No
18140	43.221	0.383	No	No		50.415	0.629	No	No
18150	64.849	0.402	No	No		36.986	0.48	No	No
18160	81.36	0.376	No	No		74.952	0.572	No	No
18170	85.4	0.465	No	No		66.153	0.638	No	No
18180	72.118	0.331	No	No		68.326	0.691	No	No
18190	88.868	0.384	No	No		62.65	0.641	No	No
18200	76.472	0.345	No	No		74.387	0.739	No	No
18210	58.991	0.387	No	No		63.007	0.757	No	No
18220	70.926	0.448	No	No		74.061	0.709	No	No
18230	68.21	0.435	No	No		86.714	0.778	No	No
18240	74.861	0.418	No	No		43.256	0.677	No	No
18250	86.393	0.403	No	No		41.169	0.725	No	No
18260	78.811	0.454	No	No		33.252	0.646	No	No
18270	88.264	0.43	No	No		53.297	0.577	No	No
18280	74.539	0.32	No	No		39.779	0.613	No	No
18290	99.603	0.352	No	No		43.187	0.662	No	No
18300	98.778	0.378	No	No		39.86	0.702	No	No
18310	88.021	0.421	No	No		26.215	0.735	No	No
18320	67.455	0.448	No	No		43.606	0.711	No	No
18330	89.751	0.415	No	No		82.311	0.735	No	No
18340	75.989	0.419	No	No		40.189	0.691	No	No
18350	65.219	0.383	No	No		53.944	0.801	No	No
18360	74.895	0.45	No	No		71.679	0.678	No	No
18370	77.13	0.349	No	No		74.27	0.695	No	No
18380	67.579	0.417	No	No		62.381	0.572	No	No
18390	77.163	0.414	No	No		32.194	0.603	No	No
18400	71.336	0.339	No	No		48.353	0.627	No	No
18410	82.407	0.389	No	No		39.241	0.627	No	No
18420	63.431	0.365	No	No		48.231	0.571	No	No
18430	78.097	0.322	No	No		47.475	0.407	No	No
18440	88.521	0.417	No	No		65.032	0.413	No	No
18450	76.662	0.432	No	No		65.613	0.568	No	No
18460	74.871	0.359	No	No		39.287	0.541	No	No
18470	68.755	0.486	No	No		34.995	0.492	No	No
18480	79.938	0.32	No	No		39.568	0.495	No	No
18490	75.313	0.308	No	No		81.094	0.538	No	No
18500	52.708	0.426	No	No		57.934	0.455	No	No
18510	58.7	0.34	No	No		43.267	0.454	No	No
18520	71.946	0.368	No	No		31.624	0.489	No	No
18530	73.239	0.319	No	No		54.601	0.542	No	No
18540	73.726	0.343	No	No		43.312	0.415	No	No
18550	97.266	0.362	No	No		51.243	0.685	No	No
18560	97.992	0.442	No	No		46.038	0.709	No	No
18570	68.835	0.446	No	No		67.843	0.637	No	No
18580	59.162	0.317	No	No		56.261	0.616	No	No
18590	67.188	0.411	No	No		46.676	0.663	No	No
18600	82.854	0.311	No	No		37.149	0.671	No	No
18610	84.502	0.418	No	No		39.799	0.657	No	No
18620	74.5	0.399	No	No		35.697	0.661	No	No
18630	61.508	0.403	No	No		57.631	0.67	No	No
18640	75.216	0.464	No	No		30.079	0.623	No	No
18650	78.311	0.397	No	No		78.061	0.702	No	No
18660	68.672	0.315	No	No		41.511	0.616	No	No
18670	70.172	0.407	No	No		51.005	0.464	No	No
18680	84.339	0.367	No	No		35.704	0.633	No	No
18690	66.144	0.418	No	No		54.099	0.745	No	No
18700	65.252	0.304	No	No		47.067	0.565	No	No
18710	72.895	0.349	No	No		39.129	0.608	No	No
18720	62.888	0.349	No	No		40.835	0.64	No	No
18730	51.964	0.309	No	No		52.216	0.71	No	No
18740	71.343	0.357	No	No		58.717	0.661	No	No
18750	73.484	0.354	No	No		41.606	0.457	No	No
18760	90.541	0.315	No	No		34.45	0.434	No	No
18770	79.584	0.378	No	No		46.416	0.454	No	No
18780	83.565	0.347	No	No		37.138	0.544	No	No
18790	73.946	0.381	No	No		46.088	0.428	No	No
18800	73.252	0.353	No	No		52.688	0.403	No	No
18810	81.457	0.352	No	No		57.78	0.436	No	No
18820	58.02	0.36	No	No		69.119	0.389	No	No
18830	65.883	0.311	No	No		55.765	0.408	No	No
18840	83.524	0.393	No	No		29.846	0.469	No	No
18850	74.681	0.382	No	No		35.781	0.431	No	No
18860	71.041	0.376	No	No		50.342	0.426	No	No
18870	62.241	0.351	No	No		46.345	0.426	No	No
18880	58.15	0.441	No	No		50.744	0.434	No	No
18890	63.707	0.363	No	No		36.922	0.439	No	No
18900	76.071	0.328	No	No		34.096	0.448	No	No
18910	60.981	0.34	No	No		46.166	0.492	No	No
18920	67.748	0.32	No	No		35.608	0.419	No	No
18930	69.373	0.4	No	No		50.635	0.421	No	No
18940	69.474	0.422	No	No		54.104	0.401	No	No
18950	66.714	0.298	No	No		51.116	0.369	No	No
18960	80.215	0.391	No	No		53.142	0.387	No	No
18970	75.674	0.361	No	No		46.121	0.383	No	No
18980	76.675	0.372	No	No		55.182	0.416	No	No
18990	56.705	0.321	No	No		54.925	0.362	No	No
19000	69.163	0.406	No	No		41.604	0.403	No	No
19010	101.716	0.407	No	No		37.783	0.42	No	No
19020	77.697	0.358	No	No		32.45	0.42	No	No
19030	70.952	0.402	No	No		47.312	0.347	No	No
19040	56.975	0.475	No	No		24.998	0.453	No	No
19050	43.416	0.308	No	No		39.671	0.427	No	No
19060	74.462	0.363	No	No		43.648	0.428	No	No
19070	58.7	0.413	No	No		39.694	0.468	No	No
19080	53.548	0.334	No	No		35.983	0.45	No	No
19090	80.556	0.405	No	No		32.881	0.477	No	No
19100	55.763	0.366	No	No		44.965	0.48	No	No
19110	67.993	0.363	No	No		80.756	0.549	No	No
19120	56.577	0.354	No	No		53.843	0.498	No	No
19130	73.628	0.368	No	No		75.879	0.448	No	No
19140	68.749	0.362	No	No		50.494	0.426	No	No
19150	82.655	0.315	No	No		49.753	0.416	No	No
19160	74.803	0.31	No	No		79.029	0.465	No	No
19170	82.529	0.429	No	No		71.253	0.543	No	No
19180	65.966	0.494	No	No		50.301	0.401	No	No
19190	60.731	0.368	No	No		53.551	0.428	No	No
19200	76.009	0.368	No	No		58.856	0.433	No	No
19210	59.627	0.406	No	No		85.265	0.452	No	No
19220	73.935	0.404	No	No		39.924	0.467	No	No
19230	56.993	0.357	No	No		33.987	0.443	No	No
19240	76.686	0.349	No	No		41.143	0.463	No	No
19250	44.77	0.391	No	No		36.228	0.478	No	No
19260	69.571	0.394	No	No		36.068	0.462	No	No
19270	59.473	0.452	No	No		39.971	0.451	No	No
19280	64.009	0.418	No	No		37.371	0.407	No	No
19290	84.149	0.404	No	No		31.954	0.444	No	No
19300	53.849	0.32	No	No		35.715	0.473	No	No
19310	83.089	0.4	No	No		42.102	0.447	No	No
19320	80.157	0.393	No	No		41.239	0.433	No	No
19330	64.867	0.371	No	No		48.749	0.454	No	No
19340	66.491	0.373	No	No		35.098	0.441	No	No
19350	72.204	0.295	No	No		35.07	0.465	No	No
19360	74.549	0.412	No	No		29.153	0.435	No	No
19370	56.152	0.346	No	No		35.707	0.538	No	No
19380	77.268	0.435	No	No		37.894	0.442	No	No
19390	73.666	0.333	No	No		48.182	0.355	No	No
19400	82.821	0.374	No	No		66.624	0.403	No	No
19410	77.186	0.366	No	No		36.515	0.474	No	No
19420	69.542	0.412	No	No		40.238	0.447	No	No
19430	76.726	0.408	No	No		45.381	0.439	No	No
19440	76.504	0.484	No	No		31.367	0.465	No	No
19450	57.554	0.428	No	No		59.668	0.475	No	No
19460	77.456	0.397	No	No		78.392	0.538	No	No
19470	90.33	0.391	No	No		42.785	0.414	No	No
19480	67.688	0.356	No	No		31.317	0.412	No	No
19490	63.481	0.437	No	No		40.31	0.435	No	No
19500	74.144	0.375	No	No		67.75	0.397	No	No
19510	56.117	0.417	No	No		45.946	0.458	No	No
19520	51.598	0.409	No	No		41.996	0.428	No	No
19530	51.445	0.319	No	No		43.099	0.413	No	No
19540	77.007	0.482	No	No		44.546	0.364	No	No
19550	66.466	0.393	No	No		52.799	0.408	No	No
19560	83.594	0.417	No	No		35.716	0.443	No	No
19570	72.284	0.291	No	No		32.662	0.469	No	No
19580	89.644	0.338	No	No		39.475	0.429	No	No
19590	78.337	0.467	No	No		41.808	0.424	No	No
19600	79.399	0.408	No	No		43.459	0.458	No	No
19610	83.835	0.521	No	No		32.521	0.478	No	No
19620	83.612	0.3	No	No		47.507	0.5	No	No
19630	65.588	0.365	No	No		37.335	0.45	No	No
19640	83.414	0.438	No	No		40.125	0.464	No	No
19650	55.914	0.306	No	No		33.998	0.412	No	No
19660	65.724	0.37	No	No		44.8	0.402	No	No
19670	55.98	0.337	No	No		67.581	0.382	No	No
19680	88.437	0.349	No	No		43.567	0.558	No	No
19690	72.197	0.366	No	No		35.923	0.582	No	No
19700	90.809	0.427	No	No		36.441	0.593	No	No
19710	77.655	0.407	No	No		47.478	0.422	No	No
19720	33.312	0.338	No	No		36.455	0.473	No	No
19730	53.531	0.421	No	No		41.193	0.452	No	No
19740	70.765	0.369	No	No		56.967	0.322	No	No
19750	70.689	0.409	No	No		34.869	0.434	No	No
19760	59.052	0.375	No	No		48.545	0.402	No	No
19770	89.711	0.379	No	No		50.656	0.422	No	No
19780	64.425	0.48	No	No		24.382	0.654	No	No
19790	78.698	0.408	No	No		48.179	0.464	No	No
19800	46.057	0.399	No	No		57.458	0.602	No	No
19810	62.648	0.425	No	No		24.574	0.529	No	No
19820	61.438	0.376	No	No		71.649	0.444	No	No
19830	40.576	0.345	No	No		39.505	0.478	No	No
19840	65.027	0.355	No	No		63.227	0.748	No	No
19850	65.006	0.363	No	No		61.342	0.72	No	No
19860	65.099	0.444	No	No		27.838	0.47	No	No
19870	79.303	0.31	No	No		51.726	0.501	No	No
19880	36.493	0.327	No	No		54.417	0.449	No	No
19890	58.337	0.446	No	No		54.151	0.418	No	No
19900	76.072	0.331	No	No		67.373	0.465	No	No
19910	88.664	0.394	No	No		64.398	0.429	No	No
19920	82.653	0.393	No	No		44.874	0.424	No	No
19930	67.902	0.403	No	No		39.005	0.435	No	No
19940	65.713	0.321	No	No		30.228	0.452	No	No
19950	78.898	0.491	No	No		47.467	0.45	No	No
19960	62.317	0.381	No	No		37.175	0.44	No	No
19970	50.01	0.406	No	No		41.213	0.443	No	No
19980	66.752	0.422	No	No		47.6	0.444	No	No
[truncated: 3,010 more rows]

## Sheet: Asn501...Asp355
Time	Asn501…Asp355 N501 angle	Asn501…Asp355 N501 dist	dist<=0.35 nm	angle<=30 deg.
0	127.555	0.787	No	No
10	124.557	0.763	No	No
20	131.947	0.77	No	No
30	132.248	0.818	No	No
40	129.357	0.764	No	No
50	128.359	0.738	No	No
60	136.122	0.792	No	No
70	125.2	0.846	No	No
80	133.659	0.878	No	No
90	128.312	0.84	No	No
100	123.066	0.85	No	No
110	143.053	0.834	No	No
120	122.305	0.775	No	No
130	137.993	0.708	No	No
140	134.982	0.778	No	No
150	133.571	0.778	No	No
160	130.219	0.784	No	No
170	120.525	0.821	No	No
180	147.372	0.683	No	No
190	131.075	0.764	No	No
200	127.874	0.787	No	No
210	144.078	0.804	No	No
220	141.773	0.876	No	No
230	129.945	0.832	No	No
240	114.361	0.877	No	No
250	134.915	0.811	No	No
260	127.374	0.842	No	No
270	126.453	0.918	No	No
280	142.065	0.859	No	No
290	132.391	0.869	No	No
300	138.187	0.895	No	No
310	137.026	0.849	No	No
320	135.384	0.827	No	No
330	119.266	0.842	No	No
340	124.036	0.843	No	No
350	131.696	0.874	No	No
360	135.563	0.913	No	No
370	131.35	0.86	No	No
380	148.758	0.795	No	No
390	127.548	0.754	No	No
400	131.802	0.77	No	No
410	127.661	0.858	No	No
420	125.238	0.874	No	No
430	113.427	0.841	No	No
440	131.181	0.893	No	No
450	127.795	0.901	No	No
460	133.926	0.823	No	No
470	135.447	0.808	No	No
480	135.874	0.81	No	No
490	129.076	0.779	No	No
500	129.185	0.791	No	No
510	143.587	0.776	No	No
520	133.258	0.813	No	No
530	127.108	0.789	No	No
540	121.325	0.907	No	No
550	122.228	0.814	No	No
560	143.752	0.864	No	No
570	129.318	0.868	No	No
580	133.632	0.816	No	No
590	140.881	0.803	No	No
600	134.898	0.825	No	No
610	129.404	0.832	No	No
620	140.464	0.851	No	No
630	130.877	0.799	No	No
640	117.815	0.851	No	No
650	124.4	0.768	No	No
660	132.744	0.846	No	No
670	129.79	0.801	No	No
680	125.999	0.829	No	No
690	116.549	0.923	No	No
700	140.782	0.855	No	No
710	128.531	0.838	No	No
720	132.539	0.771	No	No
730	136.94	0.873	No	No
740	132.544	0.828	No	No
750	129.298	0.847	No	No
760	129.119	0.847	No	No
770	137.155	0.752	No	No
780	134.202	0.844	No	No
790	133.853	0.85	No	No
800	123.009	0.852	No	No
810	129.122	0.863	No	No
820	136.18	0.819	No	No
830	136.802	0.824	No	No
840	134.857	0.85	No	No
850	127.595	0.899	No	No
860	122.855	0.887	No	No
870	128.654	0.833	No	No
880	125.571	0.861	No	No
890	129.937	0.784	No	No
900	140.746	0.869	No	No
910	127.811	0.916	No	No
920	124.367	0.837	No	No
930	123.179	0.865	No	No
940	122.718	0.869	No	No
950	132.845	0.874	No	No
960	129.207	0.881	No	No
970	126.626	0.839	No	No
980	137.196	0.783	No	No
990	137.447	0.762	No	No
1000	134.319	0.837	No	No
1010	124.355	0.887	No	No
1020	125.162	0.924	No	No
1030	139.867	0.769	No	No
1040	129.941	0.831	No	No
1050	150.504	0.707	No	No
1060	128.751	0.873	No	No
1070	135.231	0.843	No	No
1080	136.444	0.885	No	No
1090	133.923	0.837	No	No
1100	134.775	0.84	No	No
1110	131.104	0.868	No	No
1120	136.219	0.918	No	No
1130	130.305	0.843	No	No
1140	132.231	0.81	No	No
1150	133.592	0.818	No	No
1160	140.978	0.78	No	No
1170	142.085	0.697	No	No
1180	139.871	0.755	No	No
1190	147.202	0.689	No	No
1200	135.722	0.754	No	No
1210	135.396	0.795	No	No
1220	141.616	0.818	No	No
1230	143.776	0.839	No	No
1240	144.823	0.889	No	No
1250	137.75	0.877	No	No
1260	140.754	0.823	No	No
1270	135.578	0.889	No	No
1280	143.158	0.743	No	No
1290	131.603	0.814	No	No
1300	132.361	0.844	No	No
1310	133.551	0.822	No	No
1320	132.521	0.9	No	No
1330	128.35	0.899	No	No
1340	139.636	0.863	No	No
1350	136.261	0.884	No	No
1360	135.382	0.881	No	No
1370	129.647	0.856	No	No
1380	138.417	0.843	No	No
1390	137.79	0.902	No	No
1400	138.668	0.863	No	No
1410	128.469	0.843	No	No
1420	140.27	0.864	No	No
1430	127.792	0.861	No	No
1440	143.113	0.877	No	No
1450	136.047	0.88	No	No
1460	129.366	0.915	No	No
1470	134.398	0.884	No	No
1480	142.074	0.885	No	No
1490	130.887	0.839	No	No
1500	136.585	0.848	No	No
1510	139.199	0.899	No	No
1520	138.51	0.839	No	No
1530	128.792	0.917	No	No
1540	137.422	0.878	No	No
1550	134.858	0.832	No	No
1560	134.282	0.9	No	No
1570	138.89	0.887	No	No
1580	124.187	0.899	No	No
1590	133.313	0.845	No	No
1600	129.696	0.861	No	No
1610	140.909	0.819	No	No
1620	142.919	0.878	No	No
1630	133.513	0.841	No	No
1640	127.403	0.89	No	No
1650	129.837	0.851	No	No
1660	128.643	0.898	No	No
1670	131.94	0.943	No	No
1680	131.709	0.793	No	No
1690	130.737	0.849	No	No
1700	134.374	0.823	No	No
1710	141.983	0.857	No	No
1720	143.067	0.817	No	No
1730	144.952	0.928	No	No
1740	130.967	0.776	No	No
1750	149.602	0.734	No	No
1760	136.028	0.772	No	No
1770	135.319	0.737	No	No
1780	136.892	0.837	No	No
1790	140.659	0.833	No	No
1800	133.956	0.878	No	No
1810	141.472	0.805	No	No
1820	132.997	0.87	No	No
1830	130.623	0.831	No	No
1840	132.659	0.761	No	No
1850	133.082	0.794	No	No
1860	130.403	0.864	No	No
1870	138.81	0.816	No	No
1880	131.608	0.839	No	No
1890	139.847	0.854	No	No
1900	126.293	0.84	No	No
1910	127.776	0.845	No	No
1920	129.746	0.898	No	No
1930	134.886	0.844	No	No
1940	131.506	0.875	No	No
1950	134.187	0.869	No	No
1960	135.562	0.841	No	No
1970	142.832	0.824	No	No
1980	142.143	0.829	No	No
1990	129.495	0.897	No	No
2000	136.836	0.842	No	No
2010	139.96	0.761	No	No
2020	135.125	0.786	No	No
2030	136.857	0.772	No	No
2040	137.12	0.836	No	No
2050	129.354	0.853	No	No
2060	129.471	0.8	No	No
2070	136.797	0.789	No	No
2080	136.999	0.84	No	No
2090	139.837	0.751	No	No
2100	136.104	0.864	No	No
2110	136.542	0.89	No	No
2120	130.512	0.828	No	No
2130	135.94	0.764	No	No
2140	139.066	0.856	No	No
2150	128.618	0.776	No	No
2160	132.289	0.829	No	No
2170	131.857	0.714	No	No
2180	130.674	0.776	No	No
2190	136.074	0.802	No	No
2200	135.017	0.88	No	No
2210	135.035	0.793	No	No
2220	124.815	0.866	No	No
2230	133.059	0.828	No	No
2240	129.938	0.736	No	No
2250	135.086	0.875	No	No
2260	131.345	0.84	No	No
2270	140.985	0.839	No	No
2280	134.774	0.856	No	No
2290	145.916	0.798	No	No
2300	139.548	0.841	No	No
2310	132.572	0.817	No	No
2320	151.814	0.764	No	No
2330	142.302	0.668	No	No
2340	148.433	0.663	No	No
2350	150.173	0.707	No	No
2360	145.775	0.701	No	No
2370	143.946	0.693	No	No
2380	155.365	0.717	No	No
2390	153.186	0.676	No	No
2400	139.615	0.719	No	No
2410	151.563	0.757	No	No
2420	143.129	0.788	No	No
2430	135.461	0.707	No	No
2440	147.542	0.693	No	No
2450	145.556	0.731	No	No
2460	141.185	0.734	No	No
2470	141.128	0.803	No	No
2480	139.939	0.845	No	No
2490	149.084	0.781	No	No
2500	142.082	0.774	No	No
2510	134.373	0.823	No	No
2520	143.116	0.806	No	No
2530	141.116	0.722	No	No
2540	139.221	0.776	No	No
2550	145.425	0.726	No	No
2560	139.379	0.765	No	No
2570	142.596	0.759	No	No
2580	152.324	0.745	No	No
2590	146.109	0.741	No	No
2600	134.118	0.791	No	No
2610	150.026	0.713	No	No
2620	149.33	0.768	No	No
2630	144.096	0.704	No	No
2640	145.244	0.775	No	No
2650	148.378	0.733	No	No
2660	135.08	0.688	No	No
2670	141.488	0.719	No	No
2680	148.849	0.753	No	No
2690	142.859	0.732	No	No
2700	129.169	0.724	No	No
2710	145.342	0.808	No	No
2720	148.022	0.693	No	No
2730	145.313	0.713	No	No
2740	131.904	0.772	No	No
2750	157.716	0.649	No	No
2760	135.472	0.698	No	No
2770	140.317	0.747	No	No
2780	142.807	0.701	No	No
2790	141.776	0.758	No	No
2800	146.675	0.672	No	No
2810	134.96	0.721	No	No
2820	140.6	0.797	No	No
2830	140.829	0.756	No	No
2840	143.715	0.731	No	No
2850	142.882	0.674	No	No
2860	130.907	0.709	No	No
2870	138.044	0.764	No	No
2880	140.679	0.696	No	No
2890	142.112	0.719	No	No
2900	136.388	0.673	No	No
2910	145.464	0.73	No	No
2920	141.981	0.749	No	No
2930	146.192	0.73	No	No
2940	139.585	0.73	No	No
2950	147.217	0.691	No	No
2960	141.231	0.738	No	No
2970	150.451	0.759	No	No
2980	147.515	0.804	No	No
2990	136.571	0.721	No	No
3000	134.843	0.759	No	No
3010	141.619	0.773	No	No
3020	147.479	0.754	No	No
3030	143.762	0.766	No	No
3040	141.903	0.782	No	No
3050	142.535	0.742	No	No
3060	136.839	0.759	No	No
3070	132.146	0.716	No	No
3080	135.943	0.791	No	No
3090	139.59	0.719	No	No
3100	145.927	0.795	No	No
3110	144.155	0.736	No	No
3120	141.414	0.795	No	No
3130	138.774	0.693	No	No
3140	139.015	0.682	No	No
3150	150.688	0.793	No	No
3160	152.487	0.678	No	No
3170	137.486	0.725	No	No
3180	144.955	0.669	No	No
3190	147.545	0.755	No	No
3200	148.433	0.756	No	No
3210	139.686	0.74	No	No
3220	140.276	0.702	No	No
3230	141.973	0.767	No	No
3240	141.697	0.721	No	No
3250	130.626	0.814	No	No
3260	141.205	0.719	No	No
3270	142.813	0.699	No	No
3280	145.946	0.748	No	No
3290	143.383	0.752	No	No
3300	152.738	0.692	No	No
3310	139.778	0.762	No	No
3320	141.648	0.711	No	No
3330	140.957	0.747	No	No
3340	138.659	0.754	No	No
3350	149.301	0.72	No	No
3360	129.342	0.795	No	No
3370	134.931	0.809	No	No
3380	128.476	0.833	No	No
3390	141.809	0.872	No	No
3400	136.011	0.827	No	No
3410	132.913	0.781	No	No
3420	135.083	0.898	No	No
3430	125.666	0.821	No	No
3440	144.218	0.839	No	No
3450	128.824	0.816	No	No
3460	137.441	0.877	No	No
3470	139.149	0.832	No	No
3480	138.522	0.832	No	No
3490	141.432	0.771	No	No
3500	140.982	0.79	No	No
3510	139.766	0.743	No	No
3520	127.124	0.835	No	No
3530	129.215	0.839	No	No
3540	142.062	0.73	No	No
3550	126.537	0.751	No	No
3560	138.866	0.709	No	No
3570	137.763	0.752	No	No
3580	134.834	0.809	No	No
3590	130.605	0.867	No	No
3600	128.346	0.823	No	No
3610	122.473	0.865	No	No
3620	131.282	0.817	No	No
3630	142.338	0.779	No	No
3640	133.334	0.81	No	No
3650	120.529	0.756	No	No
3660	131.868	0.9	No	No
3670	134.321	0.858	No	No
3680	133.279	0.856	No	No
3690	126.772	0.853	No	No
3700	137.923	0.856	No	No
3710	134.522	0.846	No	No
3720	125.239	0.921	No	No
3730	134.888	0.897	No	No
3740	131.192	0.859	No	No
3750	138.717	0.909	No	No
3760	134.566	0.846	No	No
3770	126.144	0.807	No	No
3780	130.419	0.847	No	No
3790	121.17	0.819	No	No
3800	144.932	0.898	No	No
3810	137.792	0.927	No	No
3820	135.963	0.955	No	No
3830	133.791	0.972	No	No
3840	143.454	0.857	No	No
3850	133.73	0.856	No	No
3860	146.147	0.807	No	No
3870	130.474	0.842	No	No
3880	130.09	0.866	No	No
3890	133.342	0.797	No	No
3900	125.797	0.885	No	No
3910	123.101	0.881	No	No
3920	136.352	0.91	No	No
3930	134.287	0.825	No	No
3940	147.645	0.745	No	No
3950	134.917	0.782	No	No
3960	139.592	0.74	No	No
3970	160.981	0.7	No	No
3980	153.569	0.655	No	No
3990	144.412	0.787	No	No
4000	144.524	0.717	No	No
4010	144.645	0.761	No	No
4020	145.28	0.767	No	No
4030	149.208	0.72	No	No
4040	133.719	0.718	No	No
4050	151.953	0.681	No	No
4060	156.308	0.702	No	No
4070	142.647	0.695	No	No
4080	133.825	0.767	No	No
4090	149.414	0.719	No	No
4100	144.865	0.699	No	No
4110	136.1	0.732	No	No
4120	133.621	0.726	No	No
4130	149.151	0.712	No	No
4140	141.165	0.706	No	No
4150	126.121	0.681	No	No
4160	134.978	0.779	No	No
4170	136.402	0.725	No	No
4180	145.237	0.777	No	No
4190	123.646	0.77	No	No
4200	124.743	0.801	No	No
4210	142.306	0.749	No	No
4220	142.991	0.752	No	No
4230	138.66	0.738	No	No
4240	123.589	0.828	No	No
4250	127.993	0.764	No	No
4260	129.009	0.776	No	No
4270	129.447	0.727	No	No
4280	145.275	0.864	No	No
4290	146.921	0.844	No	No
4300	118.137	0.768	No	No
4310	142.541	0.87	No	No
4320	132.58	0.78	No	No
4330	139.11	0.806	No	No
4340	128.588	0.801	No	No
4350	136.766	0.766	No	No
4360	141.646	0.791	No	No
4370	139.856	0.803	No	No
4380	137.629	0.841	No	No
4390	149.209	0.753	No	No
4400	151.189	0.743	No	No
4410	134.125	0.826	No	No
4420	121.908	0.801	No	No
4430	142.59	0.754	No	No
4440	128.94	0.725	No	No
4450	134.834	0.808	No	No
4460	129.223	0.887	No	No
4470	125.291	0.856	No	No
4480	125.947	0.763	No	No
4490	135.628	0.787	No	No
4500	147.219	0.688	No	No
4510	145.378	0.732	No	No
4520	142.732	0.795	No	No
4530	142.523	0.789	No	No
4540	135.953	0.821	No	No
4550	131.886	0.806	No	No
4560	145.341	0.689	No	No
4570	148.815	0.695	No	No
4580	154.299	0.697	No	No
4590	132.367	0.835	No	No
4600	154.891	0.756	No	No
4610	140.381	0.685	No	No
4620	148.506	0.666	No	No
4630	140.158	0.738	No	No
4640	144.217	0.783	No	No
4650	136.661	0.748	No	No
4660	143.077	0.786	No	No
4670	141.522	0.753	No	No
4680	140.979	0.758	No	No
4690	141.76	0.754	No	No
4700	142.11	0.676	No	No
4710	142.445	0.798	No	No
4720	149.939	0.689	No	No
4730	143.282	0.711	No	No
4740	137.225	0.688	No	No
4750	148.473	0.688	No	No
4760	146.729	0.716	No	No
4770	134.541	0.731	No	No
4780	141.82	0.715	No	No
4790	147.615	0.728	No	No
4800	136.79	0.714	No	No
4810	143.043	0.717	No	No
4820	137.201	0.734	No	No
4830	147.632	0.762	No	No
4840	158.003	0.744	No	No
4850	134.501	0.719	No	No
4860	131.024	0.675	No	No
4870	144.758	0.68	No	No
4880	140.275	0.702	No	No
4890	132.95	0.668	No	No
4900	144.616	0.749	No	No
4910	129.141	0.737	No	No
4920	132.569	0.696	No	No
4930	145.856	0.722	No	No
4940	137.965	0.721	No	No
4950	135.276	0.706	No	No
4960	144.922	0.72	No	No
4970	146.857	0.766	No	No
4980	133.459	0.686	No	No
4990	138.617	0.72	No	No
5000	153.174	0.604	No	No
5010	129.545	0.823	No	No
5020	144.035	0.776	No	No
5030	146.739	0.807	No	No
5040	127.406	0.785	No	No
5050	129.854	0.851	No	No
5060	145.815	0.718	No	No
5070	143.163	0.833	No	No
5080	140.601	0.829	No	No
5090	137.78	0.743	No	No
5100	146.954	0.709	No	No
5110	138.415	0.772	No	No
5120	152.54	0.791	No	No
5130	149.124	0.741	No	No
5140	133.516	0.787	No	No
5150	129.66	0.77	No	No
5160	132.331	0.756	No	No
5170	136.393	0.729	No	No
5180	138.317	0.764	No	No
5190	143.048	0.687	No	No
5200	145.617	0.739	No	No
5210	140.396	0.753	No	No
5220	135.858	0.785	No	No
5230	143.617	0.792	No	No
5240	139.684	0.73	No	No
5250	126.371	0.815	No	No
5260	145.258	0.71	No	No
5270	134.106	0.693	No	No
5280	135.822	0.716	No	No
5290	147.876	0.769	No	No
5300	149.439	0.715	No	No
5310	143.636	0.731	No	No
5320	144.289	0.755	No	No
5330	138.252	0.71	No	No
5340	150.484	0.758	No	No
5350	142.238	0.76	No	No
5360	139.92	0.704	No	No
5370	136.8	0.747	No	No
5380	142.302	0.782	No	No
5390	124.793	0.805	No	No
5400	125.112	0.896	No	No
5410	143.473	0.731	No	No
5420	144.328	0.771	No	No
5430	142.471	0.816	No	No
5440	143.188	0.711	No	No
5450	129.836	0.845	No	No
5460	138.757	0.829	No	No
5470	135.982	0.789	No	No
5480	142.705	0.766	No	No
5490	116.957	0.795	No	No
5500	137.366	0.87	No	No
5510	137.394	0.776	No	No
5520	131.33	0.798	No	No
5530	130.846	0.81	No	No
5540	135.838	0.883	No	No
5550	138.181	0.695	No	No
5560	128.949	0.777	No	No
5570	141.268	0.781	No	No
5580	128.586	0.795	No	No
5590	135.484	0.772	No	No
5600	135.082	0.842	No	No
5610	130.708	0.816	No	No
5620	141.964	0.762	No	No
5630	132.16	0.802	No	No
5640	139.133	0.837	No	No
5650	134.611	0.763	No	No
5660	142.621	0.722	No	No
5670	136.896	0.788	No	No
5680	136.422	0.817	No	No
5690	135.739	0.843	No	No
5700	128.427	0.738	No	No
5710	137.685	0.786	No	No
5720	133.953	0.777	No	No
5730	129.906	0.783	No	No
5740	132.266	0.812	No	No
5750	126.304	0.858	No	No
5760	124.94	0.763	No	No
5770	129.599	0.731	No	No
5780	126.038	0.743	No	No
5790	130.378	0.782	No	No
5800	129.952	0.801	No	No
5810	144.909	0.829	No	No
5820	137.34	0.731	No	No
5830	28.837	0.52	No	No
5840	75.641	0.408	No	No
5850	27.932	0.383	No	No
5860	80.667	0.434	No	No
5870	104.817	0.424	No	No
5880	82.215	0.422	No	No
5890	84.857	0.421	No	No
5900	100.127	0.488	No	No
5910	39.547	0.52	No	No
5920	59.614	0.427	No	No
5930	36.223	0.533	No	No
5940	75.173	0.48	No	No
5950	89.542	0.477	No	No
5960	79.703	0.443	No	No
5970	59.607	0.555	No	No
5980	25.536	0.511	No	No
5990	40.124	0.634	No	No
6000	50.484	0.553	No	No
6010	22.48	0.474	No	No
6020	28.076	0.457	No	No
6030	36.357	0.39	No	No
6040	32.917	0.482	No	No
6050	36.406	0.484	No	No
6060	37.74	0.467	No	No
6070	66.459	0.417	No	No
6080	60.865	0.403	No	No
6090	35.082	0.311	No	No
6100	27.433	0.505	No	No
6110	23.298	0.438	No	No
6120	36.603	0.404	No	No
6130	35.187	0.472	No	No
6140	51.818	0.365	No	No
6150	39.392	0.413	No	No
6160	31.527	0.413	No	No
6170	44.748	0.598	No	No
6180	25.838	0.447	No	No
6190	43.732	0.401	No	No
6200	18.185	0.417	No	No
6210	32.447	0.473	No	No
6220	48.995	0.408	No	No
6230	31.055	0.391	No	No
6240	59.996	0.419	No	No
6250	33.404	0.363	No	No
6260	51.076	0.437	No	No
6270	49.072	0.453	No	No
6280	64.04	0.44	No	No
6290	35.275	0.426	No	No
6300	34.485	0.437	No	No
6310	28.727	0.456	No	No
6320	32.622	0.467	No	No
6330	29.289	0.44	No	No
6340	34.216	0.462	No	No
6350	37.107	0.429	No	No
6360	21.473	0.453	No	No
6370	18.923	0.467	No	No
6380	22.733	0.48	No	No
6390	21.649	0.387	No	No
6400	22.927	0.358	No	No
6410	36.545	0.439	No	No
6420	45.29	0.408	No	No
6430	23.309	0.338	0.338	23.309
6440	22.811	0.459	No	No
6450	22.711	0.462	No	No
6460	20.297	0.545	No	No
6470	33.927	0.444	No	No
6480	43.215	0.458	No	No
6490	22.928	0.5	No	No
6500	34.937	0.451	No	No
6510	37.028	0.471	No	No
6520	43.941	0.43	No	No
6530	23.142	0.461	No	No
6540	67.206	0.412	No	No
6550	38.22	0.381	No	No
6560	18.127	0.497	No	No
6570	42.942	0.515	No	No
6580	21.295	0.433	No	No
6590	41.483	0.437	No	No
6600	36.936	0.549	No	No
6610	31.662	0.493	No	No
6620	32.681	0.401	No	No
6630	44.005	0.507	No	No
6640	17.684	0.586	No	No
6650	38.332	0.494	No	No
6660	44.893	0.391	No	No
6670	70.464	0.489	No	No
6680	19.097	0.508	No	No
6690	44.092	0.384	No	No
6700	23.832	0.48	No	No
6710	29.154	0.478	No	No
6720	23.96	0.408	No	No
6730	14.17	0.548	No	No
6740	30.396	0.498	No	No
6750	27.527	0.445	No	No
6760	14.233	0.534	No	No
6770	10.085	0.553	No	No
6780	34.711	0.505	No	No
6790	12.789	0.525	No	No
6800	18.864	0.52	No	No
6810	24.436	0.507	No	No
6820	43.11	0.544	No	No
6830	25.447	0.512	No	No
6840	38.001	0.461	No	No
6850	18.588	0.42	No	No
6860	43.243	0.536	No	No
6870	34.941	0.415	No	No
6880	33.354	0.382	No	No
6890	38.698	0.421	No	No
6900	36.815	0.453	No	No
6910	53.876	0.486	No	No
6920	41.655	0.48	No	No
6930	25.383	0.43	No	No
6940	27.041	0.495	No	No
6950	52.817	0.434	No	No
6960	25.274	0.439	No	No
6970	29.048	0.435	No	No
6980	25.076	0.449	No	No
6990	27.599	0.47	No	No
7000	20.956	0.444	No	No
7010	34.393	0.343	No	No
7020	27.845	0.453	No	No
7030	23.919	0.491	No	No
7040	31.51	0.394	No	No
7050	41.509	0.462	No	No
7060	36.111	0.366	No	No
7070	25.893	0.398	No	No
7080	19.559	0.453	No	No
7090	32.59	0.565	No	No
7100	21.302	0.479	No	No
7110	46.709	0.464	No	No
7120	27.722	0.492	No	No
7130	24.519	0.412	No	No
7140	17.977	0.467	No	No
7150	20.606	0.513	No	No
7160	28.053	0.553	No	No
7170	29.474	0.422	No	No
7180	60.157	0.443	No	No
7190	31.966	0.452	No	No
7200	19.481	0.463	No	No
7210	30.216	0.471	No	No
7220	22.859	0.549	No	No
7230	46.715	0.483	No	No
7240	38.065	0.491	No	No
7250	39.896	0.482	No	No
7260	27.555	0.419	No	No
7270	49.244	0.527	No	No
7280	32.319	0.494	No	No
7290	37.142	0.456	No	No
7300	34.381	0.465	No	No
7310	27.07	0.497	No	No
7320	18.268	0.504	No	No
7330	47.389	0.486	No	No
7340	44.054	0.468	No	No
7350	41.306	0.521	No	No
7360	41.105	0.488	No	No
7370	41.622	0.448	No	No
7380	43.535	0.454	No	No
7390	29.126	0.479	No	No
7400	39.169	0.454	No	No
7410	16.308	0.52	No	No
7420	38.971	0.461	No	No
7430	29.62	0.52	No	No
7440	30.396	0.462	No	No
7450	27.538	0.447	No	No
7460	24.441	0.561	No	No
7470	48.575	0.468	No	No
7480	31.769	0.501	No	No
7490	53.065	0.476	No	No
7500	27.516	0.444	No	No
7510	27.819	0.42	No	No
7520	9.012	0.485	No	No
7530	46.695	0.336	No	No
7540	31.848	0.503	No	No
7550	37.005	0.423	No	No
7560	35.103	0.475	No	No
7570	40.494	0.486	No	No
7580	26.447	0.488	No	No
7590	47.298	0.468	No	No
7600	32.176	0.44	No	No
7610	49.863	0.431	No	No
7620	30.918	0.399	No	No
7630	32.933	0.45	No	No
7640	39.845	0.357	No	No
7650	17.834	0.38	No	No
7660	41.09	0.446	No	No
7670	46.623	0.461	No	No
7680	19.63	0.453	No	No
7690	38.306	0.418	No	No
7700	42.656	0.43	No	No
7710	44.596	0.386	No	No
7720	51.282	0.379	No	No
7730	21.05	0.336	0.336	21.05
7740	45.983	0.395	No	No
7750	26.444	0.365	No	No
7760	39.18	0.406	No	No
7770	40.455	0.401	No	No
7780	33.399	0.374	No	No
7790	39.269	0.412	No	No
7800	44.699	0.41	No	No
7810	33.753	0.372	No	No
7820	41.764	0.378	No	No
7830	28.999	0.359	No	No
7840	33.681	0.399	No	No
7850	36.15	0.446	No	No
7860	60.137	0.384	No	No
7870	42.702	0.431	No	No
7880	22.627	0.455	No	No
7890	48.945	0.466	No	No
7900	49.269	0.475	No	No
7910	39.624	0.423	No	No
7920	47.18	0.43	No	No
7930	32.348	0.492	No	No
7940	41.246	0.426	No	No
7950	25.248	0.454	No	No
7960	22.95	0.468	No	No
7970	44.003	0.473	No	No
7980	18.645	0.505	No	No
7990	45.471	0.432	No	No
8000	20.727	0.432	No	No
8010	27.009	0.511	No	No
8020	39.57	0.466	No	No
8030	27.361	0.415	No	No
8040	19.642	0.346	0.346	19.642
[truncated: 4,204 more rows]

## Sheet: Gly502...Lys353
Time	Gly502…Lys353 N501 angle	Gly502…Lys353 N501 dist	dist<=0.35 nm	angle<=30 deg.		Gly502…Lys353 N501Y angle	Gly502…Lys353 N501Y dist	dist<=0.35 nm	angle<=30 deg.
[truncated: 5,009 more rows]

[truncated: 4 more sheets: Gly502...Gly354, Tyr505...(OE1)Glu37, Tyr505...(OE2)Glu37, Tyr505...Ala386]
